# Supplementary material
Source: MDPI journal article supplement (https://www.mdpi.com/2304-6740/6/3/76)
Supplement: s1 [file s1]

Archive with 3 entries (3 files):
- cf1707.cif
- checkcif.pdf
- inorganics-328290-supplementary.pdf
