# Supplementary material
Source: MDPI journal article supplement (https://www.mdpi.com/2304-6740/6/3/76)
Supplement: s1 [file s1 › cf1707.cif]

data_cf1707

_audit_creation_method            'SHELXL-2014/7'
_shelx_SHELXL_version_number      '2014/7'
_chemical_name_systematic         ?
_chemical_name_common             ?
_chemical_melting_point           ?
_chemical_formula_moiety    'C47 H69 Cl Ge N2 S'
_chemical_formula_sum
 'C47 H69 Cl Ge N2 S'
_chemical_formula_weight          802.14

loop_
 _atom_type_symbol
 _atom_type_description
 _atom_type_scat_dispersion_real
 _atom_type_scat_dispersion_imag
 _atom_type_scat_source
 'Ge'  'Ge'   0.1547   1.8001
 'International Tables Vol C Tables 4.2.6.8 and 6.1.1.4'
 'Cl'  'Cl'   0.1484   0.1585
 'International Tables Vol C Tables 4.2.6.8 and 6.1.1.4'
 'S'  'S'   0.1246   0.1234
 'International Tables Vol C Tables 4.2.6.8 and 6.1.1.4'
 'N'  'N'   0.0061   0.0033
 'International Tables Vol C Tables 4.2.6.8 and 6.1.1.4'
 'C'  'C'   0.0033   0.0016
 'International Tables Vol C Tables 4.2.6.8 and 6.1.1.4'
 'H'  'H'   0.0000   0.0000
 'International Tables Vol C Tables 4.2.6.8 and 6.1.1.4'

_space_group_crystal_system       monoclinic
_space_group_IT_number            14
_space_group_name_H-M_alt         'P 21/n'
_space_group_name_Hall            '-P 2yn'

_shelx_space_group_comment
;
The symmetry employed for this shelxl refinement is uniquely defined
by the following loop, which should always be used as a source of
symmetry information in preference to the above space-group names.
They are only intended as comments.
;

loop_
 _space_group_symop_operation_xyz
 'x, y, z'
 '-x+1/2, y+1/2, -z+1/2'
 '-x, -y, -z'
 'x-1/2, -y-1/2, z-1/2'

_cell_length_a                    9.3421(10)
_cell_length_b                    19.570(2)
_cell_length_c                    23.901(3)
_cell_angle_alpha                 90
_cell_angle_beta                  90.387(3)
_cell_angle_gamma                 90
_cell_volume                      4369.6(8)
_cell_formula_units_Z             4
_cell_measurement_temperature     123

_cell_measurement_reflns_used     8819

_cell_measurement_theta_min       3.0

_cell_measurement_theta_max       27.5


_exptl_crystal_description        Prism

_exptl_crystal_colour             Colorless

_exptl_crystal_density_meas       ?
_exptl_crystal_density_method     ?
_exptl_crystal_density_diffrn     1.219
_exptl_crystal_F_000              1720
_exptl_transmission_factor_min    ?
_exptl_transmission_factor_max    ?
_exptl_crystal_size_max           0.100
_exptl_crystal_size_mid           0.050
_exptl_crystal_size_min           0.020
_exptl_absorpt_coefficient_mu     0.843
_shelx_estimated_absorpt_T_min    0.920
_shelx_estimated_absorpt_T_max    0.983
_exptl_absorpt_correction_type    Numerical

_exptl_absorpt_correction_T_min   0.939

_exptl_absorpt_correction_T_max   0.980

_exptl_absorpt_process_details    ?

_exptl_absorpt_special_details    ?
_diffrn_ambient_temperature       123(2)
_diffrn_radiation_wavelength      0.71075
_diffrn_radiation_type            MoK\a
_diffrn_source                    'Rotating Anode'
_diffrn_measurement_device_type
;
Rigaku CrystalClear-SM Expert 2.1 b29
;

_diffrn_measurement_method        'profile data from \w-scans'

_diffrn_detector_area_resol_mean  5.8140

_diffrn_reflns_number             70412
_diffrn_reflns_av_unetI/netI      0.0872
_diffrn_reflns_av_R_equivalents   0.1358
_diffrn_reflns_limit_h_min        -11
_diffrn_reflns_limit_h_max        12
_diffrn_reflns_limit_k_min        -25
_diffrn_reflns_limit_k_max        25
_diffrn_reflns_limit_l_min        -31
_diffrn_reflns_limit_l_max        31
_diffrn_reflns_theta_min          3.015
_diffrn_reflns_theta_max          27.484
_diffrn_reflns_theta_full         25.242
_diffrn_measured_fraction_theta_max   0.997
_diffrn_measured_fraction_theta_full  0.996
_diffrn_reflns_Laue_measured_fraction_max    0.997
_diffrn_reflns_Laue_measured_fraction_full   0.996
_diffrn_reflns_point_group_measured_fraction_max   0.997
_diffrn_reflns_point_group_measured_fraction_full  0.996
_reflns_number_total              9966
_reflns_number_gt                 6471
_reflns_threshold_expression      'I > 2\s(I)'
_reflns_Friedel_coverage          0.000
_reflns_Friedel_fraction_max      .
_reflns_Friedel_fraction_full     .

_reflns_special_details
;
 Reflections were merged by SHELXL according to the crystal
 class for the calculation of statistics and refinement.

 _reflns_Friedel_fraction is defined as the number of unique
 Friedel pairs measured divided by the number that would be
 possible theoretically, ignoring centric projections and
 systematic absences.
;

_computing_data_collection
;
Rigaku CrystalClear-SM Expert 2.1 b29
;
_computing_cell_refinement
;
Rigaku CrystalClear-SM Expert 2.1 b29
;
_computing_data_reduction
;
Rigaku CrystalClear-SM Expert 2.1 b29
;
_computing_structure_solution  'SHELXT (Sheldrick, 2015)'
_computing_structure_refinement 'SHELXL-2014/7 (Sheldrick, 2014)'
_computing_molecular_graphics 'Yadokari-XG 2009 (Wakita Nemoto et al., 2009)'

_computing_publication_material
;Yadokari-XG 2009 (Wakita,Nemoto et al., 2009)
;

_refine_special_details           ?
_refine_ls_structure_factor_coef  Fsqd
_refine_ls_matrix_type            full
_refine_ls_weighting_scheme       calc
_refine_ls_weighting_details
'w=1/[\s^2^(Fo^2^)+(0.0666P)^2^] where P=(Fo^2^+2Fc^2^)/3'
_atom_sites_solution_primary      ?
_atom_sites_solution_secondary    ?
_atom_sites_solution_hydrogens    geom
_refine_ls_hydrogen_treatment     ?

_refine_ls_extinction_method      none
_refine_ls_extinction_coef        .
_refine_ls_number_reflns          9966
_refine_ls_number_parameters      487
_refine_ls_number_restraints      0
_refine_ls_R_factor_all           0.0868
_refine_ls_R_factor_gt            0.0486
_refine_ls_wR_factor_ref          0.1243
_refine_ls_wR_factor_gt           0.1086
_refine_ls_goodness_of_fit_ref    0.906
_refine_ls_restrained_S_all       0.906
_refine_ls_shift/su_max           0.001
_refine_ls_shift/su_mean          0.000

loop_
 _atom_site_label
 _atom_site_type_symbol
 _atom_site_fract_x
 _atom_site_fract_y
 _atom_site_fract_z
 _atom_site_U_iso_or_equiv
 _atom_site_adp_type
 _atom_site_occupancy
 _atom_site_site_symmetry_order
 _atom_site_calc_flag
 _atom_site_refinement_flags_posn
 _atom_site_refinement_flags_adp
 _atom_site_refinement_flags_occupancy
 _atom_site_disorder_assembly
 _atom_site_disorder_group
Ge1 Ge 0.48034(3) 0.61912(2) 0.62525(2) 0.02372(9) Uani 1 1 d . . . . .
S1 S 0.27182(8) 0.62923(4) 0.65463(3) 0.03540(18) Uani 1 1 d . . . . .
Cl1 Cl 0.47531(8) 0.63079(3) 0.53261(3) 0.03204(17) Uani 1 1 d . . . . .
C1 C 0.6339(3) 0.68079(13) 0.65366(10) 0.0224(5) Uani 1 1 d . . . . .
C2 C 0.6841(3) 0.73864(14) 0.62367(10) 0.0248(6) Uani 1 1 d . . . . .
C3 C 0.7984(3) 0.77628(15) 0.64532(11) 0.0313(6) Uani 1 1 d . . . . .
H1 H 0.8336 0.8141 0.6246 0.038 Uiso 1 1 calc R U . . .
C4 C 0.8622(3) 0.76031(15) 0.69608(11) 0.0340(7) Uani 1 1 d . . . . .
H2 H 0.9435 0.7850 0.7090 0.041 Uiso 1 1 calc R U . . .
C5 C 0.8058(3) 0.70798(15) 0.72760(11) 0.0306(6) Uani 1 1 d . . . . .
H3 H 0.8459 0.6984 0.7634 0.037 Uiso 1 1 calc R U . . .
C6 C 0.6916(3) 0.66889(13) 0.70823(10) 0.0239(6) Uani 1 1 d . . . . .
C7 C 0.6166(3) 0.76873(13) 0.57129(10) 0.0258(6) Uani 1 1 d . . . . .
C8 C 0.4835(3) 0.80180(14) 0.57481(11) 0.0290(6) Uani 1 1 d . . . . .
C9 C 0.4285(3) 0.83403(15) 0.52680(12) 0.0339(7) Uani 1 1 d . . . . .
H4 H 0.3370 0.8551 0.5286 0.041 Uiso 1 1 calc R U . . .
C10 C 0.5030(3) 0.83625(15) 0.47689(12) 0.0348(7) Uani 1 1 d . . . . .
C11 C 0.6339(3) 0.80521(15) 0.47493(11) 0.0332(7) Uani 1 1 d . . . . .
H5 H 0.6863 0.8069 0.4410 0.040 Uiso 1 1 calc R U . . .
C12 C 0.6940(3) 0.77098(14) 0.52096(11) 0.0283(6) Uani 1 1 d . . . . .
C13 C 0.4040(3) 0.80718(15) 0.62985(12) 0.0321(6) Uani 1 1 d . . . . .
H6 H 0.4276 0.7654 0.6522 0.039 Uiso 1 1 calc R U . . .
C14 C 0.2417(3) 0.81032(16) 0.62393(13) 0.0389(7) Uani 1 1 d . . . . .
H64 H 0.2140 0.8540 0.6069 0.058 Uiso 1 1 calc R U . . .
H65 H 0.1980 0.8064 0.6610 0.058 Uiso 1 1 calc R U . . .
H66 H 0.2086 0.7726 0.6001 0.058 Uiso 1 1 calc R U . . .
C15 C 0.4597(4) 0.86891(17) 0.66278(14) 0.0462(8) Uani 1 1 d . . . . .
H67 H 0.5635 0.8647 0.6681 0.069 Uiso 1 1 calc R U . . .
H68 H 0.4130 0.8706 0.6993 0.069 Uiso 1 1 calc R U . . .
H69 H 0.4383 0.9109 0.6420 0.069 Uiso 1 1 calc R U . . .
C16 C 0.4416(4) 0.87329(17) 0.42571(13) 0.0452(8) Uani 1 1 d . . . . .
H13 H 0.5097 0.8647 0.3944 0.054 Uiso 1 1 calc R U . . .
C17 C 0.2999(4) 0.84506(18) 0.40719(14) 0.0497(9) Uani 1 1 d . . . . .
H70 H 0.2279 0.8546 0.4358 0.075 Uiso 1 1 calc R U . . .
H71 H 0.3081 0.7956 0.4019 0.075 Uiso 1 1 calc R U . . .
H72 H 0.2711 0.8666 0.3718 0.075 Uiso 1 1 calc R U . . .
C18 C 0.4402(4) 0.94906(17) 0.43486(15) 0.0526(9) Uani 1 1 d . . . . .
H73 H 0.4081 0.9720 0.4005 0.079 Uiso 1 1 calc R U . . .
H74 H 0.5369 0.9646 0.4446 0.079 Uiso 1 1 calc R U . . .
H75 H 0.3747 0.9601 0.4654 0.079 Uiso 1 1 calc R U . . .
C19 C 0.8374(3) 0.73596(15) 0.51300(12) 0.0338(7) Uani 1 1 d . . . . .
H20 H 0.8561 0.7067 0.5466 0.041 Uiso 1 1 calc R U . . .
C20 C 0.8347(4) 0.68929(17) 0.46138(12) 0.0408(8) Uani 1 1 d . . . . .
H76 H 0.7496 0.6600 0.4626 0.061 Uiso 1 1 calc R U . . .
H77 H 0.9208 0.6607 0.4612 0.061 Uiso 1 1 calc R U . . .
H78 H 0.8318 0.7173 0.4274 0.061 Uiso 1 1 calc R U . . .
C21 C 0.9613(4) 0.78670(18) 0.50789(14) 0.0471(8) Uani 1 1 d . . . . .
H79 H 0.9443 0.8167 0.4757 0.071 Uiso 1 1 calc R U . . .
H80 H 1.0510 0.7616 0.5026 0.071 Uiso 1 1 calc R U . . .
H81 H 0.9679 0.8142 0.5421 0.071 Uiso 1 1 calc R U . . .
C22 C 0.6297(3) 0.61959(14) 0.75050(10) 0.0248(6) Uani 1 1 d . . . . .
C23 C 0.5112(3) 0.64038(14) 0.78232(11) 0.0280(6) Uani 1 1 d . . . . .
C24 C 0.4618(3) 0.59701(16) 0.82469(11) 0.0328(7) Uani 1 1 d . . . . .
H27 H 0.3800 0.6103 0.8454 0.039 Uiso 1 1 calc R U . . .
C25 C 0.5273(3) 0.53570(15) 0.83754(11) 0.0330(7) Uani 1 1 d . . . . .
C26 C 0.6473(3) 0.51793(14) 0.80703(11) 0.0299(6) Uani 1 1 d . . . . .
H28 H 0.6954 0.4765 0.8160 0.036 Uiso 1 1 calc R U . . .
C27 C 0.7007(3) 0.55806(13) 0.76376(10) 0.0258(6) Uani 1 1 d . . . . .
C28 C 0.4437(3) 0.71080(15) 0.77580(12) 0.0352(7) Uani 1 1 d . . . . .
H29 H 0.4560 0.7249 0.7359 0.042 Uiso 1 1 calc R U . . .
C29 C 0.2834(4) 0.71323(18) 0.78837(14) 0.0466(8) Uani 1 1 d . . . . .
H82 H 0.2342 0.6771 0.7674 0.070 Uiso 1 1 calc R U . . .
H83 H 0.2448 0.7578 0.7772 0.070 Uiso 1 1 calc R U . . .
H84 H 0.2685 0.7064 0.8285 0.070 Uiso 1 1 calc R U . . .
C30 C 0.5238(4) 0.76302(16) 0.81216(15) 0.0482(9) Uani 1 1 d . . . . .
H85 H 0.5189 0.7492 0.8515 0.072 Uiso 1 1 calc R U . . .
H86 H 0.4796 0.8081 0.8076 0.072 Uiso 1 1 calc R U . . .
H87 H 0.6242 0.7652 0.8006 0.072 Uiso 1 1 calc R U . . .
C31 C 0.4718(4) 0.48733(16) 0.88249(12) 0.0417(8) Uani 1 1 d . . . . .
H36 H 0.4589 0.4417 0.8644 0.050 Uiso 1 1 calc R U . . .
C32 C 0.3280(4) 0.50764(19) 0.90565(15) 0.0536(10) Uani 1 1 d . . . . .
H88 H 0.3359 0.5523 0.9239 0.080 Uiso 1 1 calc R U . . .
H89 H 0.2969 0.4735 0.9330 0.080 Uiso 1 1 calc R U . . .
H90 H 0.2578 0.5103 0.8751 0.080 Uiso 1 1 calc R U . . .
C33 C 0.5811(5) 0.4780(2) 0.92940(14) 0.0603(11) Uani 1 1 d . . . . .
H91 H 0.5984 0.5220 0.9478 0.090 Uiso 1 1 calc R U . . .
H92 H 0.6709 0.4608 0.9138 0.090 Uiso 1 1 calc R U . . .
H93 H 0.5442 0.4452 0.9567 0.090 Uiso 1 1 calc R U . . .
C34 C 0.8347(3) 0.53600(14) 0.73357(11) 0.0307(6) Uani 1 1 d . . . . .
H43 H 0.8391 0.5619 0.6976 0.037 Uiso 1 1 calc R U . . .
C35 C 0.8346(3) 0.45930(14) 0.71935(12) 0.0326(7) Uani 1 1 d . . . . .
H94 H 0.8454 0.4327 0.7538 0.049 Uiso 1 1 calc R U . . .
H95 H 0.9143 0.4492 0.6942 0.049 Uiso 1 1 calc R U . . .
H96 H 0.7440 0.4473 0.7009 0.049 Uiso 1 1 calc R U . . .
C36 C 0.9713(3) 0.55339(17) 0.76770(14) 0.0436(8) Uani 1 1 d . . . . .
H97 H 0.9695 0.6017 0.7783 0.065 Uiso 1 1 calc R U . . .
H98 H 1.0561 0.5444 0.7449 0.065 Uiso 1 1 calc R U . . .
H99 H 0.9749 0.5250 0.8015 0.065 Uiso 1 1 calc R U . . .
C37 C 0.5574(3) 0.52054(13) 0.62443(10) 0.0238(6) Uani 1 1 d . . . . .
N1 N 0.4898(2) 0.46465(11) 0.64532(9) 0.0251(5) Uani 1 1 d . . . . .
C38 C 0.5568(3) 0.40575(14) 0.62663(11) 0.0267(6) Uani 1 1 d . . . . .
C39 C 0.6693(3) 0.42527(14) 0.59522(11) 0.0292(6) Uani 1 1 d . . . . .
N2 N 0.6680(2) 0.49650(11) 0.59386(9) 0.0255(5) Uani 1 1 d . . . . .
C40 C 0.3672(3) 0.46696(14) 0.68476(11) 0.0274(6) Uani 1 1 d . . . . .
H50 H 0.3587 0.5152 0.6981 0.033 Uiso 1 1 calc R U . . .
C41 C 0.3913(4) 0.42235(15) 0.73642(11) 0.0356(7) Uani 1 1 d . . . . .
H100 H 0.3736 0.3744 0.7268 0.053 Uiso 1 1 calc R U . . .
H101 H 0.3255 0.4364 0.7660 0.053 Uiso 1 1 calc R U . . .
H102 H 0.4902 0.4276 0.7496 0.053 Uiso 1 1 calc R U . . .
C42 C 0.2284(3) 0.44971(16) 0.65424(12) 0.0345(7) Uani 1 1 d . . . . .
H103 H 0.2128 0.4824 0.6238 0.052 Uiso 1 1 calc R U . . .
H104 H 0.1484 0.4522 0.6805 0.052 Uiso 1 1 calc R U . . .
H105 H 0.2345 0.4034 0.6388 0.052 Uiso 1 1 calc R U . . .
C43 C 0.5121(4) 0.33384(15) 0.63935(13) 0.0387(7) Uani 1 1 d . . . . .
H112 H 0.5426 0.3036 0.6090 0.058 Uiso 1 1 calc R U . . .
H113 H 0.4077 0.3318 0.6428 0.058 Uiso 1 1 calc R U . . .
H114 H 0.5568 0.3191 0.6745 0.058 Uiso 1 1 calc R U . . .
C44 C 0.7823(3) 0.37943(15) 0.57206(12) 0.0362(7) Uani 1 1 d . . . . .
H115 H 0.8692 0.3830 0.5951 0.054 Uiso 1 1 calc R U . . .
H116 H 0.8037 0.3931 0.5336 0.054 Uiso 1 1 calc R U . . .
H117 H 0.7480 0.3321 0.5723 0.054 Uiso 1 1 calc R U . . .
C45 C 0.7639(3) 0.53907(15) 0.55893(11) 0.0308(6) Uani 1 1 d . . . . .
H63 H 0.7317 0.5875 0.5633 0.037 Uiso 1 1 calc R U . . .
C46 C 0.9194(3) 0.53627(18) 0.57840(13) 0.0428(8) Uani 1 1 d . . . . .
H106 H 0.9250 0.5479 0.6182 0.064 Uiso 1 1 calc R U . . .
H107 H 0.9760 0.5690 0.5569 0.064 Uiso 1 1 calc R U . . .
H108 H 0.9571 0.4901 0.5726 0.064 Uiso 1 1 calc R U . . .
C47 C 0.7447(3) 0.52092(16) 0.49753(11) 0.0371(7) Uani 1 1 d . . . . .
H109 H 0.7714 0.4730 0.4917 0.056 Uiso 1 1 calc R U . . .
H110 H 0.8059 0.5504 0.4747 0.056 Uiso 1 1 calc R U . . .
H111 H 0.6444 0.5276 0.4866 0.056 Uiso 1 1 calc R U . . .

loop_
 _atom_site_aniso_label
 _atom_site_aniso_U_11
 _atom_site_aniso_U_22
 _atom_site_aniso_U_33
 _atom_site_aniso_U_23
 _atom_site_aniso_U_13
 _atom_site_aniso_U_12
Ge1 0.02674(16) 0.02474(15) 0.01967(14) -0.00081(12) -0.00113(10) 0.00005(12)
S1 0.0275(4) 0.0337(4) 0.0451(4) -0.0018(3) 0.0060(3) 0.0020(3)
Cl1 0.0436(4) 0.0328(4) 0.0196(3) 0.0012(3) -0.0069(3) -0.0037(3)
C1 0.0245(14) 0.0243(13) 0.0185(12) -0.0015(11) 0.0007(10) -0.0008(11)
C2 0.0283(15) 0.0280(13) 0.0180(12) -0.0023(11) 0.0005(11) 0.0017(12)
C3 0.0381(17) 0.0332(15) 0.0225(13) 0.0039(12) -0.0003(12) -0.0094(13)
C4 0.0363(17) 0.0398(16) 0.0258(14) 0.0035(13) -0.0066(12) -0.0114(14)
C5 0.0345(16) 0.0378(16) 0.0195(13) 0.0031(12) -0.0038(12) -0.0024(13)
C6 0.0306(15) 0.0239(13) 0.0174(12) -0.0016(11) 0.0022(11) 0.0039(11)
C7 0.0353(16) 0.0237(13) 0.0183(12) 0.0006(11) -0.0046(11) -0.0043(12)
C8 0.0393(17) 0.0244(13) 0.0232(13) -0.0034(12) -0.0034(12) -0.0026(12)
C9 0.0357(17) 0.0338(15) 0.0322(15) 0.0006(13) -0.0052(13) 0.0042(13)
C10 0.0439(19) 0.0350(16) 0.0253(14) 0.0048(13) -0.0054(13) 0.0001(14)
C11 0.0435(18) 0.0354(16) 0.0205(13) 0.0046(13) -0.0001(12) -0.0030(14)
C12 0.0362(16) 0.0271(14) 0.0215(13) 0.0019(11) -0.0002(12) -0.0036(12)
C13 0.0367(17) 0.0320(15) 0.0277(14) -0.0003(13) -0.0004(12) 0.0048(13)
C14 0.0429(19) 0.0362(16) 0.0378(17) 0.0000(14) 0.0040(14) 0.0081(14)
C15 0.050(2) 0.051(2) 0.0378(17) -0.0171(16) 0.0013(15) 0.0025(16)
C16 0.056(2) 0.052(2) 0.0275(15) 0.0100(15) -0.0055(15) 0.0060(17)
C17 0.068(2) 0.0423(19) 0.0388(18) 0.0058(16) -0.0197(17) 0.0018(17)
C18 0.065(2) 0.049(2) 0.0433(19) 0.0175(17) -0.0122(18) -0.0074(18)
C19 0.0406(18) 0.0391(16) 0.0219(13) 0.0032(13) 0.0027(12) 0.0034(14)
C20 0.048(2) 0.0437(18) 0.0307(16) -0.0010(14) 0.0135(14) -0.0003(15)
C21 0.042(2) 0.058(2) 0.0415(18) 0.0003(17) 0.0054(15) -0.0060(17)
C22 0.0284(14) 0.0312(14) 0.0148(11) -0.0018(11) -0.0049(10) -0.0054(12)
C23 0.0340(16) 0.0324(14) 0.0174(12) -0.0024(11) 0.0003(11) -0.0010(12)
C24 0.0352(17) 0.0413(16) 0.0218(13) -0.0040(13) 0.0047(12) -0.0043(14)
C25 0.0472(19) 0.0349(16) 0.0170(13) 0.0008(12) 0.0024(12) -0.0109(14)
C26 0.0401(17) 0.0292(14) 0.0202(13) 0.0016(12) -0.0038(12) -0.0025(13)
C27 0.0337(16) 0.0273(14) 0.0162(12) -0.0010(11) -0.0046(11) -0.0034(12)
C28 0.0446(18) 0.0377(16) 0.0234(14) 0.0009(13) 0.0074(13) 0.0071(14)
C29 0.049(2) 0.054(2) 0.0373(17) -0.0026(16) 0.0061(15) 0.0150(17)
C30 0.063(2) 0.0331(16) 0.049(2) -0.0065(16) 0.0124(17) 0.0036(16)
C31 0.062(2) 0.0351(16) 0.0279(15) 0.0001(13) 0.0099(15) -0.0135(15)
C32 0.070(3) 0.048(2) 0.0423(19) 0.0010(17) 0.0260(18) -0.0148(19)
C33 0.086(3) 0.064(2) 0.0306(17) 0.0174(18) 0.0047(18) -0.018(2)
C34 0.0355(16) 0.0333(15) 0.0234(14) 0.0011(12) -0.0001(12) 0.0011(13)
C35 0.0349(17) 0.0330(15) 0.0298(15) -0.0004(13) -0.0030(13) 0.0065(13)
C36 0.0379(18) 0.0466(19) 0.0463(19) -0.0126(16) 0.0001(15) -0.0007(15)
C37 0.0261(14) 0.0280(14) 0.0172(12) -0.0013(11) -0.0012(11) 0.0011(12)
N1 0.0304(13) 0.0259(11) 0.0190(10) -0.0002(9) 0.0008(9) 0.0012(10)
C38 0.0331(16) 0.0263(13) 0.0207(13) -0.0018(11) -0.0021(11) 0.0038(12)
C39 0.0367(17) 0.0293(14) 0.0216(13) -0.0013(12) -0.0017(12) 0.0066(12)
N2 0.0288(13) 0.0280(12) 0.0197(11) -0.0001(10) 0.0013(9) 0.0021(10)
C40 0.0328(16) 0.0306(15) 0.0190(13) -0.0018(11) 0.0051(11) -0.0040(12)
C41 0.0502(19) 0.0356(16) 0.0212(13) 0.0019(13) 0.0017(13) -0.0104(14)
C42 0.0334(17) 0.0417(17) 0.0285(15) -0.0040(13) 0.0034(13) -0.0036(13)
C43 0.050(2) 0.0281(15) 0.0380(17) 0.0002(14) 0.0032(15) 0.0020(14)
C44 0.0398(17) 0.0376(16) 0.0312(15) 0.0003(14) 0.0014(13) 0.0097(14)
C45 0.0342(16) 0.0355(16) 0.0227(14) 0.0008(12) 0.0063(12) -0.0008(13)
C46 0.0339(18) 0.062(2) 0.0326(16) 0.0032(16) 0.0074(13) -0.0048(16)
C47 0.0464(19) 0.0426(17) 0.0225(14) -0.0015(13) 0.0087(13) -0.0028(15)

_geom_special_details
;
 All esds (except the esd in the dihedral angle between two l.s. planes)
 are estimated using the full covariance matrix.  The cell esds are taken
 into account individually in the estimation of esds in distances, angles
 and torsion angles; correlations between esds in cell parameters are only
 used when they are defined by crystal symmetry.  An approximate (isotropic)
 treatment of cell esds is used for estimating esds involving l.s. planes.
;

loop_
 _geom_bond_atom_site_label_1
 _geom_bond_atom_site_label_2
 _geom_bond_distance
 _geom_bond_site_symmetry_2
 _geom_bond_publ_flag
Ge1 C1 1.991(3) . ?
Ge1 C37 2.060(3) . ?
Ge1 S1 2.0846(8) . ?
Ge1 Cl1 2.2261(7) . ?
C1 C2 1.421(4) . ?
C1 C6 1.427(3) . ?
C2 C3 1.394(4) . ?
C2 C7 1.517(3) . ?
C3 C4 1.384(4) . ?
C3 H1 0.9500 . ?
C4 C5 1.378(4) . ?
C4 H2 0.9500 . ?
C5 C6 1.390(4) . ?
C5 H3 0.9500 . ?
C6 C22 1.514(4) . ?
C7 C8 1.405(4) . ?
C7 C12 1.409(4) . ?
C8 C9 1.403(4) . ?
C8 C13 1.519(4) . ?
C9 C10 1.386(4) . ?
C9 H4 0.9500 . ?
C10 C11 1.366(4) . ?
C10 C16 1.530(4) . ?
C11 C12 1.402(4) . ?
C11 H5 0.9500 . ?
C12 C19 1.518(4) . ?
C13 C14 1.523(4) . ?
C13 C15 1.531(4) . ?
C13 H6 1.0000 . ?
C14 H64 0.9800 . ?
C14 H65 0.9800 . ?
C14 H66 0.9800 . ?
C15 H67 0.9800 . ?
C15 H68 0.9800 . ?
C15 H69 0.9800 . ?
C16 C17 1.499(5) . ?
C16 C18 1.499(5) . ?
C16 H13 1.0000 . ?
C17 H70 0.9800 . ?
C17 H71 0.9800 . ?
C17 H72 0.9800 . ?
C18 H73 0.9800 . ?
C18 H74 0.9800 . ?
C18 H75 0.9800 . ?
C19 C21 1.530(4) . ?
C19 C20 1.535(4) . ?
C19 H20 1.0000 . ?
C20 H76 0.9800 . ?
C20 H77 0.9800 . ?
C20 H78 0.9800 . ?
C21 H79 0.9800 . ?
C21 H80 0.9800 . ?
C21 H81 0.9800 . ?
C22 C23 1.407(4) . ?
C22 C27 1.410(4) . ?
C23 C24 1.402(4) . ?
C23 C28 1.523(4) . ?
C24 C25 1.381(4) . ?
C24 H27 0.9500 . ?
C25 C26 1.386(4) . ?
C25 C31 1.525(4) . ?
C26 C27 1.394(4) . ?
C26 H28 0.9500 . ?
C27 C34 1.512(4) . ?
C28 C29 1.530(4) . ?
C28 C30 1.533(4) . ?
C28 H29 1.0000 . ?
C29 H82 0.9800 . ?
C29 H83 0.9800 . ?
C29 H84 0.9800 . ?
C30 H85 0.9800 . ?
C30 H86 0.9800 . ?
C30 H87 0.9800 . ?
C31 C32 1.510(5) . ?
C31 C33 1.522(5) . ?
C31 H36 1.0000 . ?
C32 H88 0.9800 . ?
C32 H89 0.9800 . ?
C32 H90 0.9800 . ?
C33 H91 0.9800 . ?
C33 H92 0.9800 . ?
C33 H93 0.9800 . ?
C34 C35 1.539(4) . ?
C34 C36 1.548(4) . ?
C34 H43 1.0000 . ?
C35 H94 0.9800 . ?
C35 H95 0.9800 . ?
C35 H96 0.9800 . ?
C36 H97 0.9800 . ?
C36 H98 0.9800 . ?
C36 H99 0.9800 . ?
C37 N2 1.353(3) . ?
C37 N1 1.360(3) . ?
N1 C38 1.387(3) . ?
N1 C40 1.489(3) . ?
C38 C39 1.352(4) . ?
C38 C43 1.500(4) . ?
C39 N2 1.394(3) . ?
C39 C44 1.494(4) . ?
N2 C45 1.485(4) . ?
C40 C42 1.522(4) . ?
C40 C41 1.528(4) . ?
C40 H50 1.0000 . ?
C41 H100 0.9800 . ?
C41 H101 0.9800 . ?
C41 H102 0.9800 . ?
C42 H103 0.9800 . ?
C42 H104 0.9800 . ?
C42 H105 0.9800 . ?
C43 H112 0.9800 . ?
C43 H113 0.9800 . ?
C43 H114 0.9800 . ?
C44 H115 0.9800 . ?
C44 H116 0.9800 . ?
C44 H117 0.9800 . ?
C45 C47 1.519(4) . ?
C45 C46 1.523(4) . ?
C45 H63 1.0000 . ?
C46 H106 0.9800 . ?
C46 H107 0.9800 . ?
C46 H108 0.9800 . ?
C47 H109 0.9800 . ?
C47 H110 0.9800 . ?
C47 H111 0.9800 . ?

loop_
 _geom_angle_atom_site_label_1
 _geom_angle_atom_site_label_2
 _geom_angle_atom_site_label_3
 _geom_angle
 _geom_angle_site_symmetry_1
 _geom_angle_site_symmetry_3
 _geom_angle_publ_flag
C1 Ge1 C37 108.65(10) . . ?
C1 Ge1 S1 120.04(8) . . ?
C37 Ge1 S1 114.82(8) . . ?
C1 Ge1 Cl1 106.70(7) . . ?
C37 Ge1 Cl1 95.26(7) . . ?
S1 Ge1 Cl1 108.17(3) . . ?
C2 C1 C6 117.9(2) . . ?
C2 C1 Ge1 123.38(18) . . ?
C6 C1 Ge1 118.65(19) . . ?
C3 C2 C1 119.2(2) . . ?
C3 C2 C7 114.5(2) . . ?
C1 C2 C7 126.1(2) . . ?
C4 C3 C2 122.0(3) . . ?
C4 C3 H1 119.0 . . ?
C2 C3 H1 119.0 . . ?
C5 C4 C3 118.9(3) . . ?
C5 C4 H2 120.6 . . ?
C3 C4 H2 120.6 . . ?
C4 C5 C6 121.5(2) . . ?
C4 C5 H3 119.2 . . ?
C6 C5 H3 119.2 . . ?
C5 C6 C1 119.9(2) . . ?
C5 C6 C22 115.1(2) . . ?
C1 C6 C22 124.8(2) . . ?
C8 C7 C12 119.8(2) . . ?
C8 C7 C2 119.5(2) . . ?
C12 C7 C2 120.3(2) . . ?
C9 C8 C7 118.5(3) . . ?
C9 C8 C13 119.9(3) . . ?
C7 C8 C13 121.5(2) . . ?
C10 C9 C8 122.3(3) . . ?
C10 C9 H4 118.8 . . ?
C8 C9 H4 118.8 . . ?
C11 C10 C9 118.0(3) . . ?
C11 C10 C16 120.9(3) . . ?
C9 C10 C16 121.0(3) . . ?
C10 C11 C12 122.6(3) . . ?
C10 C11 H5 118.7 . . ?
C12 C11 H5 118.7 . . ?
C11 C12 C7 118.7(3) . . ?
C11 C12 C19 117.8(2) . . ?
C7 C12 C19 123.5(2) . . ?
C8 C13 C14 114.5(2) . . ?
C8 C13 C15 109.5(3) . . ?
C14 C13 C15 110.5(2) . . ?
C8 C13 H6 107.3 . . ?
C14 C13 H6 107.3 . . ?
C15 C13 H6 107.3 . . ?
C13 C14 H64 109.5 . . ?
C13 C14 H65 109.5 . . ?
H64 C14 H65 109.5 . . ?
C13 C14 H66 109.5 . . ?
H64 C14 H66 109.5 . . ?
H65 C14 H66 109.5 . . ?
C13 C15 H67 109.5 . . ?
C13 C15 H68 109.5 . . ?
H67 C15 H68 109.5 . . ?
C13 C15 H69 109.5 . . ?
H67 C15 H69 109.5 . . ?
H68 C15 H69 109.5 . . ?
C17 C16 C18 113.5(3) . . ?
C17 C16 C10 112.8(3) . . ?
C18 C16 C10 110.8(3) . . ?
C17 C16 H13 106.4 . . ?
C18 C16 H13 106.4 . . ?
C10 C16 H13 106.4 . . ?
C16 C17 H70 109.5 . . ?
C16 C17 H71 109.5 . . ?
H70 C17 H71 109.5 . . ?
C16 C17 H72 109.5 . . ?
H70 C17 H72 109.5 . . ?
H71 C17 H72 109.5 . . ?
C16 C18 H73 109.5 . . ?
C16 C18 H74 109.5 . . ?
H73 C18 H74 109.5 . . ?
C16 C18 H75 109.5 . . ?
H73 C18 H75 109.5 . . ?
H74 C18 H75 109.5 . . ?
C12 C19 C21 112.7(3) . . ?
C12 C19 C20 111.1(2) . . ?
C21 C19 C20 109.3(3) . . ?
C12 C19 H20 107.9 . . ?
C21 C19 H20 107.9 . . ?
C20 C19 H20 107.9 . . ?
C19 C20 H76 109.5 . . ?
C19 C20 H77 109.5 . . ?
H76 C20 H77 109.5 . . ?
C19 C20 H78 109.5 . . ?
H76 C20 H78 109.5 . . ?
H77 C20 H78 109.5 . . ?
C19 C21 H79 109.5 . . ?
C19 C21 H80 109.5 . . ?
H79 C21 H80 109.5 . . ?
C19 C21 H81 109.5 . . ?
H79 C21 H81 109.5 . . ?
H80 C21 H81 109.5 . . ?
C23 C22 C27 119.7(2) . . ?
C23 C22 C6 118.8(2) . . ?
C27 C22 C6 120.9(2) . . ?
C24 C23 C22 118.6(3) . . ?
C24 C23 C28 118.9(3) . . ?
C22 C23 C28 122.2(2) . . ?
C25 C24 C23 122.6(3) . . ?
C25 C24 H27 118.7 . . ?
C23 C24 H27 118.7 . . ?
C24 C25 C26 117.4(3) . . ?
C24 C25 C31 122.9(3) . . ?
C26 C25 C31 119.7(3) . . ?
C25 C26 C27 122.9(3) . . ?
C25 C26 H28 118.5 . . ?
C27 C26 H28 118.5 . . ?
C26 C27 C22 118.6(3) . . ?
C26 C27 C34 119.6(2) . . ?
C22 C27 C34 121.8(2) . . ?
C23 C28 C29 114.4(3) . . ?
C23 C28 C30 110.2(2) . . ?
C29 C28 C30 110.0(3) . . ?
C23 C28 H29 107.3 . . ?
C29 C28 H29 107.3 . . ?
C30 C28 H29 107.3 . . ?
C28 C29 H82 109.5 . . ?
C28 C29 H83 109.5 . . ?
H82 C29 H83 109.5 . . ?
C28 C29 H84 109.5 . . ?
H82 C29 H84 109.5 . . ?
H83 C29 H84 109.5 . . ?
C28 C30 H85 109.5 . . ?
C28 C30 H86 109.5 . . ?
H85 C30 H86 109.5 . . ?
C28 C30 H87 109.5 . . ?
H85 C30 H87 109.5 . . ?
H86 C30 H87 109.5 . . ?
C32 C31 C33 110.8(3) . . ?
C32 C31 C25 113.7(3) . . ?
C33 C31 C25 111.3(3) . . ?
C32 C31 H36 106.8 . . ?
C33 C31 H36 106.8 . . ?
C25 C31 H36 106.8 . . ?
C31 C32 H88 109.5 . . ?
C31 C32 H89 109.5 . . ?
H88 C32 H89 109.5 . . ?
C31 C32 H90 109.5 . . ?
H88 C32 H90 109.5 . . ?
H89 C32 H90 109.5 . . ?
C31 C33 H91 109.5 . . ?
C31 C33 H92 109.5 . . ?
H91 C33 H92 109.5 . . ?
C31 C33 H93 109.5 . . ?
H91 C33 H93 109.5 . . ?
H92 C33 H93 109.5 . . ?
C27 C34 C35 112.6(2) . . ?
C27 C34 C36 111.6(2) . . ?
C35 C34 C36 109.3(2) . . ?
C27 C34 H43 107.7 . . ?
C35 C34 H43 107.7 . . ?
C36 C34 H43 107.7 . . ?
C34 C35 H94 109.5 . . ?
C34 C35 H95 109.5 . . ?
H94 C35 H95 109.5 . . ?
C34 C35 H96 109.5 . . ?
H94 C35 H96 109.5 . . ?
H95 C35 H96 109.5 . . ?
C34 C36 H97 109.5 . . ?
C34 C36 H98 109.5 . . ?
H97 C36 H98 109.5 . . ?
C34 C36 H99 109.5 . . ?
H97 C36 H99 109.5 . . ?
H98 C36 H99 109.5 . . ?
N2 C37 N1 106.1(2) . . ?
N2 C37 Ge1 126.79(19) . . ?
N1 C37 Ge1 125.92(19) . . ?
C37 N1 C38 109.8(2) . . ?
C37 N1 C40 124.7(2) . . ?
C38 N1 C40 125.4(2) . . ?
C39 C38 N1 107.4(2) . . ?
C39 C38 C43 126.6(3) . . ?
N1 C38 C43 126.0(3) . . ?
C38 C39 N2 106.8(2) . . ?
C38 C39 C44 126.2(3) . . ?
N2 C39 C44 126.7(3) . . ?
C37 N2 C39 110.0(2) . . ?
C37 N2 C45 125.0(2) . . ?
C39 N2 C45 124.7(2) . . ?
N1 C40 C42 110.3(2) . . ?
N1 C40 C41 112.6(2) . . ?
C42 C40 C41 112.4(2) . . ?
N1 C40 H50 107.1 . . ?
C42 C40 H50 107.1 . . ?
C41 C40 H50 107.1 . . ?
C40 C41 H100 109.5 . . ?
C40 C41 H101 109.5 . . ?
H100 C41 H101 109.5 . . ?
C40 C41 H102 109.5 . . ?
H100 C41 H102 109.5 . . ?
H101 C41 H102 109.5 . . ?
C40 C42 H103 109.5 . . ?
C40 C42 H104 109.5 . . ?
H103 C42 H104 109.5 . . ?
C40 C42 H105 109.5 . . ?
H103 C42 H105 109.5 . . ?
H104 C42 H105 109.5 . . ?
C38 C43 H112 109.5 . . ?
C38 C43 H113 109.5 . . ?
H112 C43 H113 109.5 . . ?
C38 C43 H114 109.5 . . ?
H112 C43 H114 109.5 . . ?
H113 C43 H114 109.5 . . ?
C39 C44 H115 109.5 . . ?
C39 C44 H116 109.5 . . ?
H115 C44 H116 109.5 . . ?
C39 C44 H117 109.5 . . ?
H115 C44 H117 109.5 . . ?
H116 C44 H117 109.5 . . ?
N2 C45 C47 110.1(2) . . ?
N2 C45 C46 112.7(2) . . ?
C47 C45 C46 113.1(2) . . ?
N2 C45 H63 106.8 . . ?
C47 C45 H63 106.8 . . ?
C46 C45 H63 106.8 . . ?
C45 C46 H106 109.5 . . ?
C45 C46 H107 109.5 . . ?
H106 C46 H107 109.5 . . ?
C45 C46 H108 109.5 . . ?
H106 C46 H108 109.5 . . ?
H107 C46 H108 109.5 . . ?
C45 C47 H109 109.5 . . ?
C45 C47 H110 109.5 . . ?
H109 C47 H110 109.5 . . ?
C45 C47 H111 109.5 . . ?
H109 C47 H111 109.5 . . ?
H110 C47 H111 109.5 . . ?

loop_
 _geom_torsion_atom_site_label_1
 _geom_torsion_atom_site_label_2
 _geom_torsion_atom_site_label_3
 _geom_torsion_atom_site_label_4
 _geom_torsion
 _geom_torsion_site_symmetry_1
 _geom_torsion_site_symmetry_2
 _geom_torsion_site_symmetry_3
 _geom_torsion_site_symmetry_4
 _geom_torsion_publ_flag
C6 C1 C2 C3 7.7(4) . . . . ?
Ge1 C1 C2 C3 -175.9(2) . . . . ?
C6 C1 C2 C7 -166.5(2) . . . . ?
Ge1 C1 C2 C7 9.9(4) . . . . ?
C1 C2 C3 C4 -2.0(4) . . . . ?
C7 C2 C3 C4 172.9(3) . . . . ?
C2 C3 C4 C5 -3.7(5) . . . . ?
C3 C4 C5 C6 3.4(5) . . . . ?
C4 C5 C6 C1 2.6(4) . . . . ?
C4 C5 C6 C22 -172.5(3) . . . . ?
C2 C1 C6 C5 -8.1(4) . . . . ?
Ge1 C1 C6 C5 175.4(2) . . . . ?
C2 C1 C6 C22 166.5(2) . . . . ?
Ge1 C1 C6 C22 -10.1(4) . . . . ?
C3 C2 C7 C8 -105.1(3) . . . . ?
C1 C2 C7 C8 69.3(4) . . . . ?
C3 C2 C7 C12 67.2(3) . . . . ?
C1 C2 C7 C12 -118.4(3) . . . . ?
C12 C7 C8 C9 2.6(4) . . . . ?
C2 C7 C8 C9 174.9(2) . . . . ?
C12 C7 C8 C13 -173.3(3) . . . . ?
C2 C7 C8 C13 -1.0(4) . . . . ?
C7 C8 C9 C10 -2.2(4) . . . . ?
C13 C8 C9 C10 173.8(3) . . . . ?
C8 C9 C10 C11 0.6(4) . . . . ?
C8 C9 C10 C16 -178.5(3) . . . . ?
C9 C10 C11 C12 0.7(4) . . . . ?
C16 C10 C11 C12 179.8(3) . . . . ?
C10 C11 C12 C7 -0.2(4) . . . . ?
C10 C11 C12 C19 177.5(3) . . . . ?
C8 C7 C12 C11 -1.5(4) . . . . ?
C2 C7 C12 C11 -173.7(2) . . . . ?
C8 C7 C12 C19 -179.1(3) . . . . ?
C2 C7 C12 C19 8.7(4) . . . . ?
C9 C8 C13 C14 33.3(4) . . . . ?
C7 C8 C13 C14 -150.8(3) . . . . ?
C9 C8 C13 C15 -91.4(3) . . . . ?
C7 C8 C13 C15 84.4(3) . . . . ?
C11 C10 C16 C17 121.7(3) . . . . ?
C9 C10 C16 C17 -59.2(4) . . . . ?
C11 C10 C16 C18 -109.7(4) . . . . ?
C9 C10 C16 C18 69.3(4) . . . . ?
C11 C12 C19 C21 71.9(3) . . . . ?
C7 C12 C19 C21 -110.5(3) . . . . ?
C11 C12 C19 C20 -51.1(3) . . . . ?
C7 C12 C19 C20 126.6(3) . . . . ?
C5 C6 C22 C23 94.5(3) . . . . ?
C1 C6 C22 C23 -80.3(3) . . . . ?
C5 C6 C22 C27 -76.5(3) . . . . ?
C1 C6 C22 C27 108.7(3) . . . . ?
C27 C22 C23 C24 -3.5(4) . . . . ?
C6 C22 C23 C24 -174.6(2) . . . . ?
C27 C22 C23 C28 170.8(2) . . . . ?
C6 C22 C23 C28 -0.2(4) . . . . ?
C22 C23 C24 C25 2.0(4) . . . . ?
C28 C23 C24 C25 -172.6(3) . . . . ?
C23 C24 C25 C26 0.7(4) . . . . ?
C23 C24 C25 C31 -178.3(3) . . . . ?
C24 C25 C26 C27 -1.8(4) . . . . ?
C31 C25 C26 C27 177.2(3) . . . . ?
C25 C26 C27 C22 0.2(4) . . . . ?
C25 C26 C27 C34 178.3(3) . . . . ?
C23 C22 C27 C26 2.5(4) . . . . ?
C6 C22 C27 C26 173.4(2) . . . . ?
C23 C22 C27 C34 -175.6(2) . . . . ?
C6 C22 C27 C34 -4.7(4) . . . . ?
C24 C23 C28 C29 -35.3(4) . . . . ?
C22 C23 C28 C29 150.3(3) . . . . ?
C24 C23 C28 C30 89.3(3) . . . . ?
C22 C23 C28 C30 -85.1(3) . . . . ?
C24 C25 C31 C32 8.3(4) . . . . ?
C26 C25 C31 C32 -170.6(3) . . . . ?
C24 C25 C31 C33 -117.8(3) . . . . ?
C26 C25 C31 C33 63.3(4) . . . . ?
C26 C27 C34 C35 44.1(3) . . . . ?
C22 C27 C34 C35 -137.8(3) . . . . ?
C26 C27 C34 C36 -79.2(3) . . . . ?
C22 C27 C34 C36 98.9(3) . . . . ?
N2 C37 N1 C38 -1.3(3) . . . . ?
Ge1 C37 N1 C38 166.70(18) . . . . ?
N2 C37 N1 C40 175.7(2) . . . . ?
Ge1 C37 N1 C40 -16.3(3) . . . . ?
C37 N1 C38 C39 1.8(3) . . . . ?
C40 N1 C38 C39 -175.2(2) . . . . ?
C37 N1 C38 C43 -178.5(3) . . . . ?
C40 N1 C38 C43 4.5(4) . . . . ?
N1 C38 C39 N2 -1.5(3) . . . . ?
C43 C38 C39 N2 178.8(3) . . . . ?
N1 C38 C39 C44 172.3(3) . . . . ?
C43 C38 C39 C44 -7.5(5) . . . . ?
N1 C37 N2 C39 0.4(3) . . . . ?
Ge1 C37 N2 C39 -167.49(19) . . . . ?
N1 C37 N2 C45 174.1(2) . . . . ?
Ge1 C37 N2 C45 6.3(4) . . . . ?
C38 C39 N2 C37 0.7(3) . . . . ?
C44 C39 N2 C37 -173.0(3) . . . . ?
C38 C39 N2 C45 -173.1(2) . . . . ?
C44 C39 N2 C45 13.2(4) . . . . ?
C37 N1 C40 C42 105.2(3) . . . . ?
C38 N1 C40 C42 -78.3(3) . . . . ?
C37 N1 C40 C41 -128.4(3) . . . . ?
C38 N1 C40 C41 48.2(3) . . . . ?
C37 N2 C45 C47 -114.5(3) . . . . ?
C39 N2 C45 C47 58.3(3) . . . . ?
C37 N2 C45 C46 118.1(3) . . . . ?
C39 N2 C45 C46 -69.1(3) . . . . ?

_refine_diff_density_max    0.911
_refine_diff_density_min   -0.958
_refine_diff_density_rms    0.090

_shelx_res_file
;

    cf1707.res created by SHELXL-2014/7

TITL cf1707
REM  Yadorkari-X generated
CELL 0.71075 9.3421 19.5700 23.9010 90.0000 90.3870 90.0000
ZERR 4.0 0.0010 0.0020 0.0030 0.0000 0.0030 0.0000
LATT 1
SYMM 1/2-X, 1/2+Y, 1/2-Z
REM  SPGR P21/n monoclinic
SFAC Ge Cl S N C H
UNIT 4 4 4 8 188 276
SIZE 0.10 0.05 0.02
TEMP -150.0
L.S. 10
FMAP 2
PLAN -20
ACTA
CONF
LIST 4
WPDB -1
BOND $H
MERG 2
OMIT -10.000000 55.000000
OMIT    2    6   11
OMIT    4    1   16
OMIT    0   11   10
OMIT    0    9    7
OMIT    3    1   11
OMIT    2   14    3
OMIT    1    1    3
OMIT    6   14    7
OMIT   -4   14    5
OMIT    4    8    7
OMIT    1   11    2
OMIT    1    8    3
OMIT    3   15    4
OMIT    0    9    1
OMIT   10   12    8
OMIT    3    0   15

WGHT    0.066600
FVAR       0.56945
GE1   1    0.480342    0.619122    0.625247    11.00000    0.02674    0.02474 =
         0.01967   -0.00081   -0.00113    0.00005
S1    3    0.271825    0.629228    0.654627    11.00000    0.02751    0.03369 =
         0.04507   -0.00176    0.00599    0.00200
CL1   2    0.475307    0.630793    0.532608    11.00000    0.04361    0.03282 =
         0.01961    0.00122   -0.00692   -0.00368
C1    5    0.633940    0.680792    0.653658    11.00000    0.02453    0.02428 =
         0.01853   -0.00145    0.00071   -0.00076
C2    5    0.684080    0.738644    0.623674    11.00000    0.02827    0.02800 =
         0.01805   -0.00232    0.00050    0.00170
C3    5    0.798422    0.776284    0.645316    11.00000    0.03810    0.03324 =
         0.02252    0.00391   -0.00029   -0.00943
AFIX  43
H1    6    0.833626    0.814057    0.624578    11.00000   -1.20000
AFIX   0
C4    5    0.862218    0.760314    0.696079    11.00000    0.03634    0.03985 =
         0.02578    0.00348   -0.00656   -0.01143
AFIX  43
H2    6    0.943528    0.785008    0.708983    11.00000   -1.20000
AFIX   0
C5    5    0.805804    0.707983    0.727596    11.00000    0.03453    0.03775 =
         0.01949    0.00313   -0.00380   -0.00238
AFIX  43
H3    6    0.845917    0.698411    0.763375    11.00000   -1.20000
AFIX   0
C6    5    0.691574    0.668892    0.708232    11.00000    0.03056    0.02392 =
         0.01735   -0.00155    0.00220    0.00385
C7    5    0.616566    0.768725    0.571292    11.00000    0.03528    0.02367 =
         0.01835    0.00064   -0.00464   -0.00427
C8    5    0.483458    0.801795    0.574806    11.00000    0.03929    0.02438 =
         0.02321   -0.00342   -0.00343   -0.00259
C9    5    0.428538    0.834027    0.526798    11.00000    0.03569    0.03381 =
         0.03223    0.00061   -0.00521    0.00425
AFIX  43
H4    6    0.337040    0.855067    0.528580    11.00000   -1.20000
AFIX   0
C10   5    0.503028    0.836253    0.476889    11.00000    0.04390    0.03504 =
         0.02530    0.00483   -0.00540    0.00007
C11   5    0.633905    0.805210    0.474929    11.00000    0.04354    0.03541 =
         0.02051    0.00464   -0.00011   -0.00305
AFIX  43
H5    6    0.686272    0.806884    0.441023    11.00000   -1.20000
AFIX   0
C12   5    0.694010    0.770983    0.520959    11.00000    0.03618    0.02710 =
         0.02152    0.00188   -0.00024   -0.00359
C13   5    0.403978    0.807176    0.629847    11.00000    0.03668    0.03199 =
         0.02772   -0.00029   -0.00036    0.00479
AFIX  13
H6    6    0.427559    0.765394    0.652162    11.00000   -1.20000
AFIX   0
C14   5    0.241694    0.810317    0.623931    11.00000    0.04287    0.03622 =
         0.03778   -0.00004    0.00405    0.00812
AFIX 137
H64   6    0.214025    0.853961    0.606911    11.00000   -1.50000
H65   6    0.198012    0.806364    0.660954    11.00000   -1.50000
H66   6    0.208616    0.772647    0.600122    11.00000   -1.50000
AFIX   0
C15   5    0.459716    0.868912    0.662776    11.00000    0.04972    0.05117 =
         0.03784   -0.01710    0.00125    0.00252
AFIX 137
H67   6    0.563462    0.864743    0.668076    11.00000   -1.50000
H68   6    0.413022    0.870614    0.699342    11.00000   -1.50000
H69   6    0.438337    0.910890    0.641983    11.00000   -1.50000
AFIX   0
C16   5    0.441643    0.873293    0.425711    11.00000    0.05581    0.05223 =
         0.02748    0.00996   -0.00550    0.00599
AFIX  13
H13   6    0.509736    0.864694    0.394385    11.00000   -1.20000
AFIX   0
C17   5    0.299941    0.845060    0.407192    11.00000    0.06781    0.04230 =
         0.03880    0.00584   -0.01975    0.00179
AFIX 137
H70   6    0.227905    0.854597    0.435768    11.00000   -1.50000
H71   6    0.308117    0.795565    0.401862    11.00000   -1.50000
H72   6    0.271133    0.866554    0.371836    11.00000   -1.50000
AFIX   0
C18   5    0.440238    0.949059    0.434860    11.00000    0.06498    0.04929 =
         0.04333    0.01754   -0.01222   -0.00743
AFIX 137
H73   6    0.408110    0.971965    0.400544    11.00000   -1.50000
H74   6    0.536938    0.964631    0.444607    11.00000   -1.50000
H75   6    0.374747    0.960120    0.465411    11.00000   -1.50000
AFIX   0
C19   5    0.837406    0.735955    0.513001    11.00000    0.04056    0.03906 =
         0.02189    0.00322    0.00268    0.00344
AFIX  13
H20   6    0.856093    0.706741    0.546591    11.00000   -1.20000
AFIX   0
C20   5    0.834659    0.689291    0.461381    11.00000    0.04801    0.04373 =
         0.03070   -0.00103    0.01347   -0.00025
AFIX 137
H76   6    0.749587    0.660041    0.462571    11.00000   -1.50000
H77   6    0.920825    0.660733    0.461211    11.00000   -1.50000
H78   6    0.831809    0.717307    0.427407    11.00000   -1.50000
AFIX   0
C21   5    0.961294    0.786695    0.507889    11.00000    0.04175    0.05802 =
         0.04149    0.00029    0.00539   -0.00601
AFIX 137
H79   6    0.944299    0.816743    0.475722    11.00000   -1.50000
H80   6    1.051002    0.761628    0.502600    11.00000   -1.50000
H81   6    0.967910    0.814204    0.542070    11.00000   -1.50000
AFIX   0
C22   5    0.629718    0.619592    0.750500    11.00000    0.02838    0.03124 =
         0.01479   -0.00182   -0.00487   -0.00537
C23   5    0.511214    0.640381    0.782322    11.00000    0.03404    0.03241 =
         0.01742   -0.00241    0.00034   -0.00100
C24   5    0.461815    0.597005    0.824692    11.00000    0.03524    0.04132 =
         0.02183   -0.00397    0.00469   -0.00431
AFIX  43
H27   6    0.379980    0.610336    0.845395    11.00000   -1.20000
AFIX   0
C25   5    0.527325    0.535697    0.837536    11.00000    0.04717    0.03494 =
         0.01696    0.00083    0.00241   -0.01086
C26   5    0.647328    0.517927    0.807032    11.00000    0.04013    0.02922 =
         0.02021    0.00159   -0.00378   -0.00253
AFIX  43
H28   6    0.695366    0.476532    0.816021    11.00000   -1.20000
AFIX   0
C27   5    0.700697    0.558064    0.763756    11.00000    0.03373    0.02727 =
         0.01619   -0.00096   -0.00465   -0.00343
C28   5    0.443688    0.710796    0.775805    11.00000    0.04461    0.03767 =
         0.02343    0.00094    0.00738    0.00713
AFIX  13
H29   6    0.455984    0.724917    0.735915    11.00000   -1.20000
AFIX   0
C29   5    0.283371    0.713234    0.788368    11.00000    0.04891    0.05363 =
         0.03735   -0.00260    0.00607    0.01502
AFIX 137
H82   6    0.234176    0.677066    0.767394    11.00000   -1.50000
H83   6    0.244763    0.757801    0.777227    11.00000   -1.50000
H84   6    0.268503    0.706397    0.828529    11.00000   -1.50000
AFIX   0
C30   5    0.523831    0.763019    0.812165    11.00000    0.06285    0.03307 =
         0.04876   -0.00654    0.01245    0.00360
AFIX 137
H85   6    0.518882    0.749164    0.851506    11.00000   -1.50000
H86   6    0.479637    0.808110    0.807602    11.00000   -1.50000
H87   6    0.624191    0.765159    0.800623    11.00000   -1.50000
AFIX   0
C31   5    0.471791    0.487328    0.882487    11.00000    0.06219    0.03512 =
         0.02788    0.00007    0.00993   -0.01352
AFIX  13
H36   6    0.458945    0.441666    0.864356    11.00000   -1.20000
AFIX   0
C32   5    0.327973    0.507644    0.905648    11.00000    0.07044    0.04842 =
         0.04229    0.00099    0.02597   -0.01477
AFIX 137
H88   6    0.335934    0.552321    0.923926    11.00000   -1.50000
H89   6    0.296872    0.473489    0.932976    11.00000   -1.50000
H90   6    0.257768    0.510308    0.875074    11.00000   -1.50000
AFIX   0
C33   5    0.581062    0.477979    0.929399    11.00000    0.08619    0.06407 =
         0.03056    0.01738    0.00469   -0.01813
AFIX 137
H91   6    0.598393    0.521972    0.947824    11.00000   -1.50000
H92   6    0.670889    0.460764    0.913831    11.00000   -1.50000
H93   6    0.544249    0.445183    0.956744    11.00000   -1.50000
AFIX   0
C34   5    0.834732    0.536003    0.733567    11.00000    0.03551    0.03329 =
         0.02340    0.00108   -0.00007    0.00107
AFIX  13
H43   6    0.839053    0.561905    0.697553    11.00000   -1.20000
AFIX   0
C35   5    0.834606    0.459302    0.719352    11.00000    0.03492    0.03304 =
         0.02975   -0.00044   -0.00303    0.00655
AFIX 137
H94   6    0.845364    0.432658    0.753842    11.00000   -1.50000
H95   6    0.914331    0.449158    0.694241    11.00000   -1.50000
H96   6    0.744045    0.447250    0.700923    11.00000   -1.50000
AFIX   0
C36   5    0.971334    0.553392    0.767704    11.00000    0.03789    0.04662 =
         0.04628   -0.01256    0.00006   -0.00067
AFIX 137
H97   6    0.969511    0.601744    0.778344    11.00000   -1.50000
H98   6    1.056053    0.544395    0.744896    11.00000   -1.50000
H99   6    0.974923    0.525046    0.801486    11.00000   -1.50000
AFIX   0
C37   5    0.557436    0.520536    0.624427    11.00000    0.02613    0.02797 =
         0.01721   -0.00129   -0.00123    0.00109
N1    4    0.489802    0.464648    0.645321    11.00000    0.03040    0.02585 =
         0.01898   -0.00017    0.00081    0.00117
C38   5    0.556756    0.405749    0.626632    11.00000    0.03312    0.02631 =
         0.02066   -0.00176   -0.00213    0.00379
C39   5    0.669349    0.425272    0.595223    11.00000    0.03671    0.02934 =
         0.02163   -0.00133   -0.00167    0.00655
N2    4    0.667983    0.496498    0.593863    11.00000    0.02883    0.02795 =
         0.01971   -0.00006    0.00128    0.00215
C40   5    0.367190    0.466957    0.684756    11.00000    0.03280    0.03057 =
         0.01897   -0.00183    0.00515   -0.00398
AFIX  13
H50   6    0.358731    0.515210    0.698100    11.00000   -1.20000
AFIX   0
C41   5    0.391301    0.422348    0.736423    11.00000    0.05015    0.03565 =
         0.02116    0.00188    0.00165   -0.01044
AFIX 137
H100  6    0.373627    0.374400    0.726779    11.00000   -1.50000
H101  6    0.325494    0.436418    0.766030    11.00000   -1.50000
H102  6    0.490250    0.427613    0.749602    11.00000   -1.50000
AFIX   0
C42   5    0.228356    0.449713    0.654244    11.00000    0.03340    0.04169 =
         0.02845   -0.00403    0.00336   -0.00360
AFIX 137
H103  6    0.212765    0.482428    0.623764    11.00000   -1.50000
H104  6    0.148379    0.452194    0.680489    11.00000   -1.50000
H105  6    0.234505    0.403412    0.638828    11.00000   -1.50000
AFIX   0
C43   5    0.512089    0.333840    0.639351    11.00000    0.05016    0.02808 =
         0.03801    0.00022    0.00316    0.00204
AFIX 137
H112  6    0.542598    0.303628    0.608984    11.00000   -1.50000
H113  6    0.407714    0.331829    0.642841    11.00000   -1.50000
H114  6    0.556766    0.319068    0.674540    11.00000   -1.50000
AFIX   0
C44   5    0.782255    0.379430    0.572057    11.00000    0.03984    0.03757 =
         0.03124    0.00030    0.00141    0.00971
AFIX 137
H115  6    0.869161    0.383018    0.595063    11.00000   -1.50000
H116  6    0.803697    0.393095    0.533568    11.00000   -1.50000
H117  6    0.747973    0.332105    0.572344    11.00000   -1.50000
AFIX   0
C45   5    0.763909    0.539070    0.558928    11.00000    0.03423    0.03548 =
         0.02273    0.00079    0.00629   -0.00078
AFIX  13
H63   6    0.731665    0.587487    0.563321    11.00000   -1.20000
AFIX   0
C46   5    0.919353    0.536274    0.578401    11.00000    0.03391    0.06212 =
         0.03261    0.00317    0.00743   -0.00478
AFIX 137
H106  6    0.924975    0.547887    0.618240    11.00000   -1.50000
H107  6    0.976030    0.569036    0.556851    11.00000   -1.50000
H108  6    0.957083    0.490099    0.572642    11.00000   -1.50000
AFIX   0
C47   5    0.744685    0.520915    0.497530    11.00000    0.04641    0.04256 =
         0.02250   -0.00149    0.00865   -0.00284
AFIX 137
H109  6    0.771420    0.473039    0.491657    11.00000   -1.50000
H110  6    0.805859    0.550407    0.474750    11.00000   -1.50000
H111  6    0.644374    0.527589    0.486582    11.00000   -1.50000

AFIX   0
HKLF 4 1 1 0 0 0 1 0 0 0 1

REM  cf1707
REM R1 =  0.0486 for    6471 Fo > 4sig(Fo)  and  0.0868 for all    9966 data
REM    487 parameters refined using      0 restraints

END

WGHT      0.0665      0.0000

REM Highest difference peak  0.911,  deepest hole -0.958,  1-sigma level  0.090
Q1    1   0.5759  0.6353  0.6303  11.00000  0.05    0.91
Q2    1   0.3784  0.6311  0.6283  11.00000  0.05    0.75
Q3    1   0.3803  0.6093  0.6261  11.00000  0.05    0.74
Q4    1   0.5528  0.5892  0.6267  11.00000  0.05    0.66
Q5    1   0.3766  0.6212  0.5357  11.00000  0.05    0.52
Q6    1   0.5558  0.6521  0.5380  11.00000  0.05    0.47
Q7    1   0.1778  0.6235  0.6560  11.00000  0.05    0.46
Q8    1   0.4414  0.6576  0.6442  11.00000  0.05    0.45
Q9    1   0.1941  0.6268  0.6209  11.00000  0.05    0.41
Q10   1   0.4687  0.5796  0.6488  11.00000  0.05    0.39
Q11   1   0.3243  0.6563  0.6761  11.00000  0.05    0.38
Q12   1   0.8615  0.7821  0.5011  11.00000  0.05    0.37
Q13   1   0.6623  0.6418  0.7281  11.00000  0.05    0.35
Q14   1   0.5515  0.4388  0.9002  11.00000  0.05    0.35
Q15   1   0.7226  0.3971  0.5845  11.00000  0.05    0.35
Q16   1   0.4968  0.5541  0.8178  11.00000  0.05    0.34
Q17   1   0.6971  0.6973  0.6443  11.00000  0.05    0.33
Q18   1   0.0457  0.8804  0.6207  11.00000  0.05    0.33
Q19   1   0.3278  0.8172  0.6339  11.00000  0.05    0.33
Q20   1   0.8973  0.5522  0.7473  11.00000  0.05    0.32
;
_shelx_res_checksum   23152

_shelx_hkl_file
;
   0   0  -4 6833.85  253.73
   0   0   4 6739.29  245.72
   0   0  -4 6247.96  219.61
   0   0   4 6318.30  220.76
   0   0  -4 6152.69  233.56
   0   0   4 5914.18  206.71
   0   0  -4 5626.72  199.72
   0   0  -4 6015.49  211.15
   0   0  -5   20.90   54.57
   0   0   5    2.41   53.12
   0   0  -5    4.62   41.90
   0   0   5    1.83   46.46
   0   0   5   12.03   54.00
   0   0   5   15.59   40.63
   0   0  -5    3.59   37.62
   0   0  -5   24.10   42.04
   0   0  -6   12.12   48.86
   0   0   6   -6.29   59.59
   0   0  -6   40.20   44.98
   0   0   6   12.05   47.45
   0   0   6   24.98   41.55
   0   0  -6   -6.34   41.20
   0   0   6   21.16   26.80
   0   0  -6   19.30   39.70
   0   0  -6   23.31   39.32
   0   0   6   21.77   41.55
   0   0  -7    4.62   56.20
   0   0   7    9.10   52.19
   0   0  -7    6.84   41.03
   0   0   7  -26.38   40.83
   0   0   7   15.31   50.66
   0   0  -7  -10.71   41.61
   0   0   7   -6.07   35.17
   0   0  -7   12.25   41.02
   0   0  -7   33.32   35.80
   0   0   7  -25.40   41.40
   0   0  -8 8113.61  285.28
   0   0   8 8465.44  292.76
   0   0  -8 8726.47  289.36
   0   0   8 9060.06  299.02
   0   0   8 8300.90  280.25
   0   0  -8 7534.32  252.29
   0   0   8 7687.13  256.24
   0   0  -8 7679.50  269.37
   0   0   8 8006.50  263.81
   0   0  -9   18.53   41.94
   0   0   9   -7.89   51.81
   0   0  -9    8.92   38.80
   0   0   9  -27.05   58.34
   0   0  -9  -16.21   40.07
   0   0   9    8.53   34.92
   0   0  -9  -13.42   38.48
   0   0  -9   -1.66   33.83
   0   0   9  -23.74   38.77
   0   0 -10 1806.75  152.27
   0   0  10 1899.74  159.04
   0   0 -10 1555.52  126.43
   0   0  10 1664.87  133.66
   0   0 -10 1739.97  141.08
   0   0  10 1430.85  115.38
   0   0 -10 1489.01  121.66
   0   0 -10 1614.75  128.97
   0   0  10 1492.92  120.60
   0   0 -11   33.93   57.75
   0   0  11   26.19   42.11
   0   0 -11    0.34   53.47
   0   0 -11   19.97   48.29
   0   0  11   20.40   33.46
   0   0 -11   20.99   35.91
   0   0 -11    0.92   38.77
   0   0  11  -10.28   43.40
   0   0 -12 1984.37  161.95
   0   0  12 1895.99  176.20
   0   0 -12 1834.96  143.97
   0   0  12 1982.17  154.93
   0   0 -12 1873.74  148.57
   0   0 -12 1995.15  154.79
   0   0  12 2247.02  172.94
   0   0 -13   55.42   53.86
   0   0  13   -1.59   66.56
   0   0 -13   18.01   41.52
   0   0  13   63.48   43.64
   0   0 -13   12.94   38.41
   0   0 -13   46.11   41.24
   0   0  13   59.86   34.50
   0   0 -14  800.71   92.52
   0   0  14  890.22  104.57
   0   0 -14  807.94   99.27
   0   0  14  852.78   88.81
   0   0 -14  852.74   95.53
   0   0 -14  980.35  102.78
   0   0  14  894.97   93.68
   0   0 -15    0.15   51.89
   0   0  15    2.91   48.73
   0   0 -15   32.33   41.11
   0   0  15   28.80   41.10
   0   0 -15   34.27   49.15
   0   0 -15   31.06   41.03
   0   0  15   34.43   44.12
   0   0 -16  158.49   50.09
   0   0  16  198.21   63.68
   0   0 -16  142.47   44.98
   0   0  16  213.42   41.59
   0   0 -16  147.23   50.21
   0   0 -16  162.77   36.40
   0   0  16  183.15   42.92
   0   0 -17   16.92   54.48
   0   0  17   46.77   50.90
   0   0 -17    6.62   40.59
   0   0  17  -14.30   30.98
   0   0 -17  -34.98   40.83
   0   0 -17   -1.06   42.48
   0   0  17  -11.55   39.71
   0   0 -18  887.83  126.73
   0   0  18  788.97  125.27
   0   0 -18  688.51   85.32
   0   0  18  867.12   97.37
   0   0 -18  759.25   91.96
   0   0 -18  879.91  105.56
   0   0 -19   22.41   57.76
   0   0  19   37.25   71.02
   0   0 -19   -3.88   48.08
   0   0  19   -5.91   43.40
   0   0 -19    5.76   41.95
   0   0 -20 4267.92  189.41
   0   0 -20 3650.57  347.35
   0   0  20 3642.92  318.52
   0   0 -20 3426.09  304.73
   0   0 -21    9.29   56.22
   0   0 -21   10.87   47.05
   0   0  21   32.50   48.60
   0   0 -21  -11.19   44.21
   0   0 -22  180.46   63.16
   0   0 -22  153.49   51.62
   0   0  22  282.24   51.76
   0   0 -22  308.13   57.66
   0   0 -23   22.44   64.11
   0   0 -23   38.40   47.06
   0   0  23   15.10   49.04
   0   0 -23  -11.88   51.50
   0   0 -24  362.98   65.41
   0   0 -24  270.26   50.18
   0   0  24  346.89   57.68
   0   0 -24  264.38   59.71
   0   0 -25   30.48   63.42
   0   0 -25   -5.25   53.47
   0   0  25   61.88   47.72
   0   0 -25  -37.74   50.96
   0   0 -26  399.53   83.01
   0   0 -26  248.95   55.64
   0   0  26  276.19   61.68
   0   0 -26  320.00   59.39
   0   0 -27  130.54   74.66
   0   0 -27    1.71   47.54
   0   0  27   -2.25   52.32
   0   0 -27    2.62   54.93
   0   0 -28  457.66   81.18
   0   0 -28  355.26   72.32
   0   0  28  540.85   80.50
   0   0 -28  352.89   56.51
   0   0 -29    8.76   71.96
   0   0 -29  -15.45   70.15
   0   0  29  -17.24   57.79
   0   0 -29   52.27   71.87
   0   0 -30   79.94   65.85
   0   0  30   76.39   60.99
   0   0 -30   71.19   60.01
   0   0 -31   55.18   89.97
   0   0  31   23.73   73.69
   0   0 -31   -1.66   54.45
   0   1  -4  159.67   62.27
   0  -1   4  151.42   55.33
   0   1   4  183.02   62.27
   0   1  -4  129.46   40.34
   0  -1   4  157.82   49.92
   0  -1   4  154.19   46.16
   0   1  -4   64.79   39.10
   0   1   4  117.31   47.00
   0  -1  -4  124.41   35.87
   0   1  -4  100.67   43.62
   0  -1  -4  148.93   42.66
   0   1  -5  686.38   69.92
   0  -1   5  795.77   83.32
   0   1   5  619.40   65.65
   0   1  -5  651.65   58.65
   0  -1   5  719.36   62.53
   0  -1  -5  776.10   65.25
   0   1  -5  646.89   62.95
   0   1   5  647.31   59.59
   0  -1   5  629.84   54.88
   0   1  -5  586.89   49.60
   0   1   5  618.26   52.13
   0  -1  -5  643.31   56.66
   0   1  -5  647.72   54.74
   0  -1  -5  612.79   52.82
   0   1   5  602.07   55.13
   0   1  -6 6650.15  241.53
   0  -1   6 6737.23  243.38
   0  -1  -6 6441.51  237.67
   0   1   6 6036.88  222.19
   0   1  -6 6245.19  217.99
   0  -1   6 6476.79  224.81
   0  -1  -6 7219.31  250.64
   0   1  -6 6365.94  223.55
   0   1   6 6127.21  215.18
   0  -1   6 6424.10  222.99
   0   1  -6 6312.13  217.56
   0   1   6 5651.74  197.74
   0  -1  -6 6053.24  210.25
   0   1  -6 6170.12  214.91
   0  -1  -6 6395.41  222.18
   0   1   6 6631.78  228.57
   0   1  -7 6372.01  232.11
   0  -1  -7 5666.06  215.86
   0  -1   7 6707.36  243.05
   0   1   7 5856.61  215.61
   0   1  -7 6068.59  213.40
   0  -1   7 6436.74  223.48
   0  -1  -7 6489.50  225.33
   0   1  -7 6038.09  213.07
   0   1   7 5238.08  185.38
   0  -1   7 5415.62  189.60
   0   1  -7 6000.00  208.32
   0   1   7 6103.87  214.38
   0  -1  -7 6081.13  211.68
   0   1  -7 6034.02  211.69
   0  -1   7 5653.15  200.25
   0  -1  -7 5810.25  203.45
   0   1   7 6584.94  229.83
   0   1  -8 6050.49  223.07
   0  -1  -8 5462.46  207.39
   0  -1   8 5972.25  218.06
   0   1   8 5615.95  212.87
   0   1  -8 5723.51  203.34
   0  -1   8 5600.77  196.38
   0  -1  -8 5523.47  195.47
   0   1   8 4758.80  170.29
   0   1  -8 4825.85  171.49
   0  -1   8 5157.14  181.99
   0   1  -8 5631.51  199.00
   0   1   8 5413.36  191.52
   0  -1  -8 5441.80  202.56
   0   1  -8 5792.25  204.38
   0  -1   8 5685.73  198.79
   0  -1  -8 5662.11  201.72
   0   1   8 5596.57  202.04
   0   1  -9 1060.31   84.97
   0  -1  -9 1140.16   98.30
   0  -1   9 1035.23   87.94
   0   1   9 1130.86   98.54
   0   1  -9  932.24   78.72
   0  -1  -9 1029.96   76.89
   0  -1   9 1053.53   81.02
   0   1   9  941.03   73.65
   0   1  -9  924.86   72.59
   0  -1   9  883.69   69.44
   0   1   9 1035.31   78.03
   0   1  -9 1016.47   77.84
   0  -1  -9  947.46   75.74
   0   1  -9  992.01   74.91
   0  -1  -9 1053.59   76.48
   0  -1   9 1150.46   86.88
   0   1   9  982.80   75.72
   0   1 -10 3878.64  289.67
   0  -1 -10 4152.19  319.88
   0  -1  10 4227.66  323.36
   0   1  10 3848.74  290.42
   0   1 -10 3849.16  282.70
   0  -1 -10 3701.07  298.50
   0  -1  10 3976.03  289.32
   0   1  10 3638.12  286.28
   0   1 -10 3188.53  234.24
   0  -1  10 3309.57  242.30
   0   1  10 3626.99  265.51
   0   1 -10 3716.44  271.02
   0  -1 -10 3521.58  259.77
   0   1 -10 3900.72  285.76
   0  -1 -10 3939.92  288.81
   0  -1  10 4062.82  295.58
   0   1  10 3697.24  269.64
   0   1 -11 3415.44  260.36
   0  -1 -11 3599.90  295.87
   0  -1  11 3389.53  272.25
   0   1  11 3018.06  244.58
   0   1 -11 3126.10  233.10
   0  -1 -11 3085.39  242.61
   0  -1  11 3617.22  269.96
   0   1  11 2743.15  211.31
   0   1 -11 3066.94  229.02
   0  -1  11 2944.92  217.99
   0   1  11 3158.83  234.81
   0   1 -11 3293.73  244.55
   0  -1 -11 3074.92  233.85
   0   1 -11 3256.85  241.71
   0  -1 -11 3293.21  242.41
   0  -1  11 3388.34  249.65
   0   1  11 3512.16  259.37
   0   1 -12   13.95   53.16
   0  -1 -12    4.87   59.64
   0  -1  12   18.83   59.42
   0   1  12   -7.59   53.89
   0   1 -12  -15.24   31.57
   0  -1 -12    5.47   30.01
   0  -1  12    7.98   61.26
   0   1  12   11.45   44.17
   0   1 -12  -10.73   36.98
   0  -1  12    5.43   37.06
   0   1  12    5.09   33.74
   0   1 -12   34.28   39.60
   0  -1 -12   31.66   44.02
   0   1 -12   -1.00   33.50
   0  -1 -12   -1.01   37.70
   0  -1  12   21.71   32.54
   0   1  12   18.51   44.90
   0   1 -13  274.83   61.95
   0  -1 -13  268.43   53.97
   0  -1  13  237.61   60.03
   0   1  13  195.49   55.01
   0   1 -13  289.62   60.03
   0  -1 -13  239.21   57.35
   0  -1  13  295.16   60.42
   0   1  13  167.28   35.60
   0   1 -13  238.28   50.50
   0  -1  13  260.54   47.84
   0   1  13  242.29   43.73
   0   1 -13  215.10   47.34
   0  -1 -13  209.04   46.65
   0   1 -13  261.95   47.63
   0  -1 -13  241.69   39.00
   0  -1  13  231.30   45.03
   0   1  13  329.96   49.82
   0   1 -14 1045.02  117.07
   0  -1 -14 1115.17  127.54
   0  -1  14  771.41   91.25
   0   1  14  893.29  112.57
   0   1 -14  955.08   98.17
   0  -1 -14  880.76  104.88
   0  -1  14 1141.94  118.45
   0   1 -14  887.77   94.36
   0  -1  14  785.38   81.23
   0   1  14  921.71   95.54
   0   1 -14  975.66  103.13
   0  -1 -14  827.00   97.63
   0   1 -14  984.88  103.19
   0  -1 -14  974.96   99.40
   0  -1  14 1075.98  109.21
   0   1  14 1001.52  103.01
   0   1 -15  436.94   61.31
   0  -1 -15  336.63   60.02
   0  -1  15  417.36   67.14
   0   1  15  431.24   63.09
   0   1 -15  454.37   60.71
   0  -1 -15  355.80   46.52
   0  -1  15  548.36   59.65
   0   1 -15  460.22   50.07
   0  -1  15  524.59   51.81
   0   1  15  458.33   44.31
   0   1 -15  434.18   49.08
   0  -1 -15  418.12   49.20
   0   1 -15  546.31   55.82
   0  -1 -15  414.31   49.28
   0  -1  15  434.83   47.16
   0   1  15  539.95   54.47
   0   1 -16  597.62   82.98
   0  -1 -16  492.28   73.64
   0  -1  16  435.22   77.08
   0   1  16  446.43   67.24
   0   1 -16  463.72   53.75
   0  -1 -16  328.73   54.04
   0   1 -16  428.27   50.07
   0  -1  16  519.08   50.57
   0   1  16  506.11   54.14
   0   1 -16  404.12   47.72
   0  -1 -16  415.27   54.01
   0   1 -16  483.49   58.34
   0  -1 -16  418.33   49.25
   0  -1  16  539.87   69.46
   0   1  16  437.69   52.33
   0   1 -17    7.01   53.11
   0  -1 -17   -4.10   46.71
   0  -1  17    8.08   55.65
   0   1  17   14.25   59.22
   0   1 -17  -15.68   42.60
   0  -1 -17   56.50   42.06
   0  -1  17    5.91   38.48
   0   1  17  -33.84   37.22
   0   1 -17   -1.56   40.35
   0  -1 -17    6.25   34.70
   0   1 -17   42.63   46.84
   0  -1 -17   47.48   41.74
   0  -1  17   15.90   57.25
   0   1  17   38.73   50.15
   0   1 -18  591.53   88.68
   0  -1 -18  539.38   82.11
   0  -1  18  399.49   61.24
   0   1  18  596.15   95.80
   0   1 -18  506.31   75.41
   0  -1 -18  390.58   64.36
   0  -1  18  555.69   77.36
   0   1  18  565.18   72.03
   0   1 -18  435.75   48.76
   0  -1 -18  503.50   62.77
   0   1 -18  588.51   78.96
   0  -1 -18  593.52   83.69
   0   1 -19  232.06   60.51
   0  -1 -19  194.93   61.37
   0  -1  19  166.45   69.76
   0   1 -19  196.07   54.06
   0  -1 -19  153.71   39.00
   0  -1  19  187.76   49.31
   0   1  19  215.21   50.02
   0   1 -19  197.75   49.58
   0  -1 -19  262.54   49.83
   0   1 -20  128.30   63.46
   0  -1 -20   10.67   60.19
   0   1 -20   77.16   42.79
   0  -1 -20   73.40   43.07
   0  -1  20  158.17   50.60
   0   1  20   42.62   44.28
   0   1 -20  118.94   47.20
   0  -1 -20  101.11   47.30
   0   1 -21   84.40   53.38
   0  -1 -21   47.49   61.92
   0   1 -21   -0.08   51.29
   0  -1 -21   10.30   48.32
   0  -1  21   18.44   54.94
   0   1  21   14.48   50.08
   0   1 -21    3.38   45.98
   0  -1 -21  -28.47   45.86
   0   1 -22  467.40   70.81
   0  -1 -22  474.10   88.48
   0   1 -22  383.63   52.12
   0  -1 -22  482.71   76.82
   0  -1  22  504.37   68.79
   0   1  22  462.29   65.88
   0   1 -22  462.89   66.51
   0  -1 -22  486.72   72.64
   0   1 -23  318.89   75.31
   0  -1 -23  369.37   72.90
   0   1 -23  293.04   68.25
   0  -1 -23  252.14   54.38
   0  -1  23  316.71   53.08
   0   1  23  363.77   54.64
   0   1 -23  355.72   53.66
   0  -1 -23  343.54   59.91
   0   1 -24  455.84   83.95
   0  -1 -24  468.14   86.85
   0   1 -24  351.00   58.96
   0  -1 -24  393.99   62.49
   0  -1  24  379.49   60.87
   0   1  24  426.58   53.78
   0   1 -24  384.09   54.11
   0  -1 -24  527.94   71.09
   0   1 -25  246.33   75.56
   0  -1 -25  302.10   85.46
   0   1 -25  222.56   52.49
   0  -1 -25  175.25   48.76
   0  -1  25  292.70   59.23
   0   1  25  183.14   55.15
   0   1 -25  257.97   60.60
   0  -1 -25  238.74   62.23
   0   1 -26  461.72   86.07
   0  -1 -26  380.37   70.43
   0   1 -26  291.69   65.26
   0  -1 -26  283.58   62.48
   0  -1  26  441.92   66.33
   0   1  26  421.19   58.18
   0   1 -26  291.07   53.75
   0  -1 -26  295.48   60.66
   0   1 -27  -38.20   71.49
   0  -1 -27  -30.00   82.55
   0   1 -27  -24.02   40.99
   0  -1 -27   38.83   50.52
   0  -1  27   78.56   62.74
   0   1  27    5.55   58.26
   0   1 -27   -6.49   53.63
   0  -1 -27  -50.28   53.69
   0   1 -28   52.81   68.23
   0  -1 -28  -42.09   77.38
   0   1 -28   -9.59   60.43
   0  -1 -28  -25.47   54.67
   0  -1  28   40.94   60.89
   0   1  28    2.33   59.66
   0   1 -28  -47.90   59.18
   0  -1 -28  -31.34   58.45
   0   1 -29   17.10   86.47
   0  -1 -29   36.34   77.50
   0   1 -29   72.88   67.44
   0  -1  29   91.53   51.64
   0   1  29   41.46   61.74
   0   1 -29    1.36   54.43
   0  -1 -29   64.43   61.94
   0   1 -30  153.98   64.19
   0  -1 -30  183.88   74.45
   0  -1  30  189.99   54.79
   0   1  30  122.36   59.43
   0   1 -30  225.14   78.83
   0  -1 -30  133.05   61.40
   0  -1  31  189.60   67.47
   0   1  31  143.10   66.25
   0   1 -31  211.95   76.09
   0  -1 -31  147.67   58.65
   0  -2  -3   -4.41   40.38
   0   2   3   12.05   43.87
   0  -2   3   26.39   40.19
   0   2  -4 3568.96  227.94
   0  -2   4 3532.32  225.02
   0   2  -4 3011.82  186.17
   0  -2  -4 3292.23  204.32
   0   2   4 3079.19  192.24
   0  -2   4 3080.07  190.07
   0   2  -5  594.71   68.36
   0  -2   5  588.81   68.59
   0   2  -5  539.85   51.20
   0  -2   5  566.47   56.58
   0   2   5  482.34   54.41
   0  -2   5  557.58   49.79
   0   2  -5  554.56   58.30
   0   2  -6 6563.40  240.15
   0  -2   6 6882.93  249.65
   0   2   6 6041.50  224.79
   0   2  -6 6117.62  214.45
   0  -2   6 5490.64  191.38
   0   2   6 5956.20  211.43
   0  -2   6 5906.98  207.47
   0   2  -6 6076.64  212.10
   0   2   6 5994.29  211.63
   0  -2  -6 6344.92  221.15
   0   2  -7  123.51   50.26
   0  -2   7  154.28   57.36
   0  -2  -7  116.87   46.27
   0   2   7  105.20   53.61
   0   2  -7  202.93   46.74
   0  -2   7  134.38   48.51
   0   2  -7  104.78   38.43
   0   2   7  103.11   43.03
   0  -2   7  163.79   38.16
   0   2  -7  102.84   38.97
   0   2   7  166.16   43.23
   0   2  -7  152.70   42.78
   0  -2  -7  133.15   39.33
   0   2  -8  204.71   50.05
   0  -2   8  154.33   57.43
   0  -2  -8  151.79   48.32
   0   2   8  178.35   60.57
   0   2  -8  207.27   50.73
   0  -2   8  217.76   48.71
   0  -2  -8  210.95   46.64
   0   2  -8  175.28   46.39
   0   2   8  127.55   38.55
   0   2   8  198.27   44.17
   0  -2   8  161.73   37.56
   0   2  -8  162.10   38.40
   0   2   8  128.37   33.46
   0   2  -8  212.46   42.46
   0  -2   8  112.57   38.34
   0  -2  -8  170.86   41.95
   0   2  -9 3598.30  225.64
   0  -2   9 2916.91  185.54
   0  -2  -9 3769.63  237.96
   0   2   9 3155.79  222.19
   0   2  -9 3614.49  222.11
   0  -2   9 3584.34  218.05
   0  -2  -9 3257.33  203.73
   0   2  -9 3390.29  208.52
   0   2   9 2905.43  179.39
   0   2   9 3149.99  195.86
   0  -2   9 3191.09  195.22
   0   2  -9 3275.86  199.73
   0   2   9 3384.25  206.81
   0   2  -9 3411.05  208.25
   0  -2   9 3130.74  190.51
   0  -2  -9 3179.75  193.90
   0   2 -10   80.14   50.94
   0  -2 -10   62.36   47.52
   0  -2  10   21.69   52.75
   0   2  10   88.02   53.39
   0   2 -10  139.57   49.75
   0  -2  10   39.75   43.17
   0  -2 -10   62.33   41.57
   0   2 -10   -1.75   49.67
   0   2  10   62.51   36.73
   0   2  10   93.17   59.30
   0  -2  10   78.95   40.55
   0   2 -10   20.16   38.49
   0   2  10   59.39   35.63
   0   2 -10   56.05   35.62
   0  -2  10   70.03   43.26
   0  -2 -10   60.08   30.54
   0   2 -11  826.44   82.78
   0  -2 -11  728.30   95.31
   0  -2  11  968.72   74.98
   0   2  11  815.80   84.60
   0   2 -11  930.79   76.21
   0  -2 -11  714.00   78.05
   0  -2  11  825.65   68.75
   0   2 -11  670.66   60.63
   0   2  11  733.55   66.31
   0   2  11  780.43   71.78
   0  -2  11  785.88   69.63
   0   2 -11  784.51   70.15
   0   2  11  827.71   67.38
   0   2 -11  783.00   68.53
   0  -2  11  918.71   73.42
   0  -2 -11  816.69   71.40
   0   2 -12 1888.57  156.78
   0  -2 -12 1609.82  167.19
   0  -2  12 1810.49  154.53
   0   2  12 1511.92  162.36
   0   2 -12 1973.71  195.86
   0  -2 -12 1623.23  174.74
   0  -2  12 1776.19  141.51
   0   2  12 1549.63  142.35
   0   2 -12 1856.54  152.02
   0  -2  12 1822.57  143.55
   0   2 -12 1341.46  108.64
   0   2  12 1786.73  144.23
   0   2 -12 1878.20  184.31
   0  -2  12 1718.16  137.70
   0  -2 -12 1811.01  144.23
   0   2 -13  210.65   62.52
   0  -2 -13  280.36   63.50
   0  -2  13  290.33   60.65
   0   2  13  222.50   65.75
   0   2 -13  274.30   53.09
   0  -2 -13  207.22   47.53
   0  -2  13  196.82   44.07
   0   2  13  240.31   49.02
   0   2 -13  210.09   39.90
   0   2  13  254.33   45.50
   0  -2  13  235.62   51.43
   0   2  13  210.85   33.53
   0   2 -13  233.48   49.20
   0   2 -13  228.93   44.18
   0  -2 -13  271.19   43.14
   0  -2  13  248.50   53.53
   0   2 -14  152.60   53.07
   0  -2 -14  123.00   51.61
   0  -2  14  141.12   51.18
   0   2  14  190.70   66.42
   0   2 -14  215.86   45.10
   0  -2 -14  168.94   52.16
   0  -2  14  156.29   45.94
   0   2  14  124.11   40.53
   0   2 -14  167.46   44.74
   0   2  14  152.68   43.38
   0  -2  14  150.96   42.75
   0   2  14  180.56   47.32
   0   2 -14  120.23   45.44
   0   2 -14  200.80   43.57
   0  -2 -14  171.58   38.29
   0  -2  14  177.84   47.73
   0   2 -15  197.28   56.19
   0  -2 -15  102.56   45.31
   0  -2  15  164.18   66.42
   0   2  15  110.42   55.84
   0   2 -15  109.75   49.92
   0  -2 -15  103.52   38.04
   0  -2  15  116.84   50.31
   0   2  15   89.27   44.47
   0   2 -15  125.46   42.82
   0   2  15  123.17   42.59
   0  -2  15  118.12   40.62
   0   2  15  127.28   39.06
   0   2 -15  115.91   46.28
   0   2 -15   84.10   41.73
   0  -2 -15  147.03   44.62
   0  -2  15   84.45   36.59
   0   2 -16  424.38   62.02
   0  -2 -16  398.54   71.68
   0  -2  16  363.10   54.01
   0   2  16  355.29   64.70
   0   2 -16  378.89   61.03
   0  -2 -16  330.37   72.41
   0  -2  16  462.32   59.40
   0   2 -16  373.18   52.15
   0   2  16  386.80   50.95
   0  -2  16  336.45   53.40
   0   2  16  304.07   34.30
   0   2 -16  411.47   51.72
   0   2 -16  433.77   47.51
   0  -2 -16  338.40   44.18
   0  -2  16  424.36   59.77
   0   2 -17  -22.77   47.63
   0  -2 -17   -1.09   45.98
   0  -2  17   41.11   53.03
   0   2  17   23.85   53.52
   0   2 -17   33.40   44.82
   0  -2 -17   20.36   35.07
   0  -2  17   10.74   53.42
   0   2 -17  -20.15   48.92
   0   2  17   17.69   43.41
   0  -2  17   -5.22   41.30
   0   2  17    8.53   41.26
   0   2 -17   -3.27   42.38
   0   2 -17    7.26   43.44
   0  -2 -17   -1.58   33.11
   0  -2  17    5.23   53.05
   0   2 -18  172.17   55.88
   0  -2 -18  184.00   63.59
   0  -2  18  150.46   52.52
   0   2  18  176.30   58.77
   0   2 -18  183.25   44.22
   0  -2 -18  197.81   46.43
   0  -2  18  239.09   49.67
   0   2 -18  230.29   49.91
   0   2  18  190.96   54.12
   0  -2  18  201.00   42.19
   0   2  18  225.14   49.14
   0   2 -18  183.46   50.04
   0   2 -18  211.04   49.41
   0  -2 -18  187.32   44.49
   0   2 -19  484.39   84.73
   0  -2 -19  232.94   56.44
   0  -2  19  320.62   64.20
   0   2 -19  348.46   47.15
   0  -2 -19  256.35   59.12
   0   2 -19  397.47   57.64
   0  -2  19  428.53   58.40
   0   2  19  405.38   46.32
   0   2 -19  458.42   67.50
   0  -2 -19  375.14   51.74
   0   2 -20  143.77   57.43
   0  -2 -20  205.90   56.29
   0  -2  20  165.78   65.01
   0   2 -20  149.65   55.47
   0  -2 -20  145.08   52.72
   0  -2  20  167.44   54.84
   0   2  20  183.41   48.23
   0   2 -20  146.31   55.21
   0  -2 -20  116.18   47.38
   0   2 -21  443.50   73.19
   0  -2 -21  346.83   80.40
   0   2 -21  274.28   48.23
   0  -2 -21  238.45   45.25
   0  -2  21  422.95   57.97
   0   2  21  342.56   44.63
   0   2 -21  398.13   52.46
   0  -2 -21  392.13   56.87
   0   2 -22  179.61   54.05
   0  -2 -22  218.13   76.16
   0   2 -22  142.69   50.58
   0  -2 -22  134.48   52.73
   0  -2  22  175.84   53.36
   0   2  22  237.79   54.36
   0   2 -22  138.29   39.61
   0  -2 -22  158.75   52.08
   0   2 -23 1394.69  179.08
   0  -2 -23 1030.71   84.62
   0   2 -23  970.14  118.65
   0  -2 -23 1147.82  146.80
   0  -2  23 1409.38  154.20
   0   2  23 1219.16  139.32
   0   2 -23 1237.84  141.58
   0  -2 -23 1072.11  129.58
   0   2 -24  -12.37   62.72
   0  -2 -24   63.48   70.29
   0   2 -24    6.62   49.47
   0  -2 -24    3.81   48.97
   0  -2  24   16.45   50.66
   0   2  24    4.53   43.74
   0   2 -24   25.02   50.78
   0  -2 -24  -42.07   50.79
   0   2 -25  -24.20   66.52
   0  -2 -25  107.44   61.51
   0   2 -25   -3.02   61.78
   0  -2 -25   24.68   51.93
   0  -2  25   30.71   59.02
   0   2  25   54.67   48.45
   0   2 -25   38.31   46.55
   0  -2 -25   44.50   47.78
   0   2 -26   41.26   68.72
   0  -2 -26   67.04   70.67
   0   2 -26   15.26   57.88
   0  -2 -26   13.64   60.55
   0  -2  26   -9.04   52.57
   0   2  26   -6.98   49.63
   0   2 -26   16.72   42.82
   0  -2 -26  -48.78   58.59
   0   2 -27   22.07   57.02
   0  -2 -27   66.29   74.08
   0   2 -27   14.79   54.00
   0  -2 -27   66.12   58.46
   0  -2  27   30.05   57.01
   0   2  27  -23.23   56.78
   0   2 -27    2.57   53.52
   0  -2 -27   81.46   63.35
   0   2 -28   79.60   75.92
   0  -2 -28   23.35   64.85
   0   2 -28  -19.01   52.43
   0  -2  28   20.23   54.48
   0   2  28  117.79   50.35
   0   2 -28  104.75   60.82
   0  -2 -28  -22.01   68.02
   0   2 -29  254.71   93.27
   0  -2 -29  190.91   86.15
   0   2 -29  195.78   58.26
   0  -2  29  227.56   68.77
   0   2  29  199.01   60.75
   0   2 -29  154.88   62.73
   0  -2 -29  236.82   63.34
   0   2 -30    8.94   71.46
   0  -2 -30   13.56   86.73
   0   2 -30  -44.17   69.29
   0  -2  30   34.86   63.85
   0   2  30   37.37   48.02
   0   2 -30   36.70   72.34
   0  -2 -30  -10.01   65.18
   0  -3   0  -11.59  105.01
   0  -3   0   15.10   59.79
   0   3   0  -30.55   31.38
   0  -3  -1  310.50   65.05
   0  -3   1  334.14   87.65
   0  -3  -1  286.97   51.17
   0  -3   1  278.84   46.41
   0   3   1  315.73   47.54
   0   3   1  248.60   48.72
   0  -3  -2 1442.71  111.61
   0   3   2 1070.38   93.57
   0   3   2 1270.39   91.02
   0  -3  -2 1279.23   91.22
   0   3   2 1240.29   89.78
   0   3   2 1073.97   76.64
   0  -3  -2 1038.36   76.46
   0   3  -3 2335.37  225.34
   0  -3  -3 2401.96  167.63
   0   3   3 2060.40  149.54
   0  -3  -3 2005.45  134.17
   0   3   3 2164.16  143.20
   0  -3  -3 2040.12  146.00
   0   3   3 2125.46  152.26
   0   3  -4  141.47   61.55
   0  -3  -4  111.83   46.27
   0  -3  -4  155.57   42.69
   0   3   4   82.27   47.13
   0  -3   4  115.60   37.22
   0   3  -5 1149.07  106.80
   0  -3   5 1135.51  107.96
   0   3  -5  868.27   64.66
   0  -3  -5  996.95   75.03
   0   3   5 1056.55   83.29
   0  -3   5  892.46   64.93
   0   3  -5  911.36   72.52
   0   3  -6 1204.26  104.52
   0  -3   6 1286.30  118.98
   0   3  -6 1147.54   88.03
   0  -3   6 1064.83   86.67
   0  -3  -6 1206.36   90.07
   0   3   6 1205.66   93.52
   0  -3   6 1202.84   96.43
   0   3  -6 1157.93   85.63
   0   3  -7  856.29   80.14
   0  -3   7  841.62   79.77
   0   3   7  568.26   73.63
   0   3  -7  654.26   52.31
   0  -3   7  717.94   55.07
   0   3   7  665.74   55.71
   0  -3   7  665.89   48.67
   0   3  -7  812.03   67.60
   0   3   7  672.21   51.77
   0   3  -7  649.91   51.96
   0   3  -8 1581.72  115.43
   0  -3   8 1266.26   92.28
   0   3   8 1284.48  120.13
   0   3  -8 1388.29   93.18
   0  -3   8 1201.35   82.56
   0   3   8 1032.76   72.31
   0  -3   8 1353.41   89.92
   0   3  -8 1359.75   93.95
   0   3   8 1254.73   84.95
   0   3  -8 1334.52   91.04
   0  -3  -8 1275.47   87.80
   0   3   8 1046.93   75.06
   0   3  -9 1210.26   95.82
   0  -3   9 1332.29  106.50
   0  -3  -9  908.78   91.18
   0   3   9 1009.29   89.49
   0   3  -9  961.95  111.15
   0  -3   9 1239.93   90.31
   0   3  -9 1048.32   74.59
   0   3   9 1013.14   76.67
   0  -3   9 1110.76   84.44
   0   3  -9 1129.29   80.65
   0   3   9  999.15   71.70
   0   3  -9 1017.63   72.39
   0  -3   9 1001.93   80.09
   0  -3  -9 1139.42   79.67
   0   3   9 1180.23   85.39
   0   3 -10 1219.74  113.56
   0  -3  10 1351.15  123.03
   0  -3 -10 1256.11  144.43
   0   3  10 1272.20  132.48
   0   3 -10 1086.80  163.04
   0  -3  10 1286.36  113.20
   0  -3 -10 1139.54  137.68
   0   3 -10 1244.04  110.34
   0   3  10 1072.77   93.94
   0   3  10 1237.75  108.96
   0  -3  10 1267.81  109.95
   0   3 -10 1195.43  104.91
   0   3  10 1119.19   96.03
   0   3 -10 1155.54   98.90
   0  -3  10 1237.07  104.82
   0  -3 -10 1258.02  108.74
   0   3 -11 2805.53  220.02
   0  -3 -11 2298.48  192.48
   0  -3  11 2947.77  230.21
   0   3  11 2452.56  231.71
   0   3 -11 2343.22   80.79
   0  -3  11 2706.42  206.98
   0  -3 -11 2230.36  212.43
   0   3 -11 2662.34  203.41
   0   3  11 2373.96  189.19
   0   3  11 2428.14  184.94
   0  -3  11 2635.77  200.33
   0   3 -11 2646.33  200.84
   0   3  11 2388.99  181.82
   0   3 -11 2409.79  182.42
   0  -3  11 2289.75  171.75
   0  -3 -11 2634.85  199.66
   0   3 -12  249.61   57.22
   0  -3 -12  192.20   60.39
   0  -3  12  178.04   58.90
   0   3  12  255.23   62.14
   0   3 -12  185.06   37.62
   0  -3  12  217.40   45.43
   0  -3 -12  200.15   52.74
   0   3 -12  235.64   49.46
   0   3  12  126.40   36.69
   0   3  12  208.67   52.22
   0  -3  12  233.66   45.30
   0   3 -12  120.59   34.28
   0   3  12  200.60   41.18
   0   3 -12  223.29   39.63
   0  -3  12  182.91   45.86
   0  -3 -12  212.81   50.09
   0   3 -13 1938.66  198.12
   0  -3 -13 1680.45  185.11
   0  -3  13 1700.57  142.65
   0   3  13 1439.50  154.34
   0   3 -13 1626.75  138.71
   0  -3  13 1789.71  140.62
   0  -3 -13 1459.29  154.30
   0   3 -13 1704.55  135.63
   0   3  13 1566.39  154.78
   0   3  13 1716.27  138.38
   0  -3  13 1829.71   78.81
   0   3 -13 1664.94  131.91
   0   3  13 1757.82  139.07
   0   3 -13 1716.10  134.98
   0  -3  13 1912.02  187.24
   0  -3 -13 1527.56  127.76
   0   3 -14 2580.30  241.93
   0  -3 -14 2283.55  246.80
   0  -3  14 2782.07  265.29
   0   3  14 2091.27  238.39
   0   3 -14 2174.57  198.22
   0  -3 -14 1877.32  201.16
   0  -3  14 2616.30  237.82
   0   3  14 1779.93  177.68
   0   3 -14 2593.74  238.94
   0   3  14 2395.78  219.95
   0  -3  14 2352.91  215.23
   0   3 -14 2258.32  207.40
   0   3  14 2307.63  210.62
   0   3 -14 2466.84  223.83
   0  -3  14 2582.84  234.44
   0  -3 -14 2450.13  224.72
   0   3 -15   26.98   48.26
   0  -3 -15   19.15   54.72
   0  -3  15   19.90   61.88
   0   3  15   -4.67   77.09
   0   3 -15   44.99   36.41
   0  -3 -15   21.84   40.84
   0  -3  15   49.47   48.84
   0   3  15  -12.35   41.29
   0   3 -15   23.22   38.64
   0   3  15   -5.52   46.20
   0  -3  15    7.87   38.12
   0   3  15   26.06   35.34
   0   3 -15    9.31   41.69
   0   3 -15   37.67   38.26
   0  -3 -15    2.72   41.94
   0  -3  15   13.39   43.77
   0   3 -16  209.07   61.17
   0  -3 -16  205.69   75.71
   0  -3  16  160.96   60.17
   0   3  16  126.94   61.54
   0   3 -16  173.47   43.64
   0  -3 -16  138.57   51.05
   0  -3  16  221.90   57.81
   0   3  16  137.42   47.16
   0   3 -16  157.88   39.49
   0   3  16  186.75   49.17
   0  -3  16  234.71   45.76
   0   3  16  158.89   43.20
   0   3 -16  159.69   50.93
   0   3 -16  176.63   43.13
   0  -3 -16  136.26   43.83
   0  -3  16  217.18   49.50
   0   3 -17   17.26   52.79
   0  -3 -17   61.85   47.24
   0  -3  17   28.97   48.09
   0   3  17   26.22   58.45
   0   3 -17   -2.41   43.90
   0  -3 -17  -13.05   38.70
   0  -3  17   -2.58   44.51
   0   3  17    9.82   44.01
   0   3 -17   20.48   44.17
   0   3  17   15.85   45.06
   0  -3  17   55.65   37.12
   0   3  17   50.79   38.45
   0   3 -17    3.61   41.71
   0   3 -17   -0.45   40.90
   0  -3 -17   -1.44   40.85
   0   3 -18   28.55   52.66
   0  -3 -18  111.68   69.38
   0  -3  18    1.68   57.56
   0   3 -18   11.78   44.52
   0  -3 -18   19.46   51.88
   0  -3  18   87.87   47.14
   0   3 -18   30.72   47.61
   0   3  18   14.94   46.70
   0  -3  18   88.61   47.91
   0   3  18   62.86   43.46
   0   3 -18   23.53   39.25
   0   3 -18   41.96   36.77
   0  -3 -18   79.35   41.72
   0   3 -19   45.20   58.43
   0  -3 -19   36.36   54.81
   0  -3  19   58.89   61.87
   0   3 -19  -17.62   51.01
   0  -3 -19   28.46   39.46
   0  -3  19   83.40   39.50
   0   3 -19   40.42   52.94
   0  -3  19   25.40   42.14
   0   3  19   28.57   40.79
   0   3 -19   53.01   41.29
   0  -3 -19   14.45   37.03
   0   3 -20   14.59   60.12
   0  -3 -20   26.19   53.23
   0  -3  20   69.17   55.74
   0   3 -20   -8.46   52.51
   0  -3 -20  -29.38   45.79
   0   3 -20   10.77   46.82
   0  -3  20    0.46   54.03
   0   3  20   13.51   38.83
   0   3 -20   -0.13   40.11
   0  -3 -20  -12.54   42.45
   0   3 -21   47.40   58.69
   0  -3 -21   72.09   55.73
   0   3 -21   39.05   55.23
   0  -3 -21  105.99   54.45
   0   3 -21   72.38   50.81
   0  -3  21   32.90   48.64
   0   3  21   75.57   46.85
   0   3 -21   73.32   40.70
   0  -3 -21   75.26   50.80
   0   3 -22 1553.58  183.20
   0  -3 -22 1121.43  154.80
   0   3 -22 1372.51  185.68
   0  -3 -22 1116.97  153.54
   0  -3  22 1403.37  154.27
   0   3  22 1314.14  147.23
   0   3 -22 1249.34  135.96
   0  -3 -22 1101.57  140.20
   0   3 -23    5.23   75.75
   0  -3 -23   24.23   60.01
   0   3 -23   32.25   41.05
   0  -3 -23   14.74   50.73
   0  -3  23   48.50   45.28
   0   3  23    0.07   50.13
   0   3 -23   22.91   41.46
   0  -3 -23   20.18   42.13
   0   3 -24   25.73   52.16
   0  -3 -24    3.96   73.47
   0   3 -24   98.40   47.86
   0  -3 -24   63.86   56.56
   0  -3  24   82.61   48.27
   0   3  24   76.94   52.00
   0   3 -24  142.55   52.98
   0  -3 -24   66.24   49.91
   0   3 -25  907.88  142.52
   0  -3 -25  746.92  125.77
   0   3 -25  772.06  121.61
   0  -3 -25  732.76  106.75
   0  -3  25  879.40  128.00
   0   3  25  908.66  136.99
   0   3 -25  935.68  135.77
   0  -3 -25  711.17   93.77
   0   3 -26  113.98   76.91
   0  -3 -26  101.35   59.82
   0   3 -26   29.98   58.46
   0  -3 -26   41.58   53.75
   0  -3  26   32.58   59.97
   0   3  26  101.38   52.41
   0   3 -26   47.40   60.99
   0  -3 -26   39.17   59.85
   0   3 -27   69.22   69.79
   0  -3 -27  -71.69   69.83
   0   3 -27  -10.93   63.70
   0  -3 -27  -50.36   51.22
   0  -3  27  -13.82   59.09
   0   3  27    1.73   47.21
   0   3 -27  -15.28   59.69
   0  -3 -27  -58.04   53.52
   0   3 -28   23.32   81.37
   0  -3 -28  -98.11   75.54
   0   3 -28  -11.60   56.40
   0  -3  28   18.12   44.61
   0   3  28  -61.01   60.44
   0   3 -28   35.37   58.87
   0  -3 -28    8.68   62.22
   0   3 -29   26.83   77.57
   0  -3 -29   75.21   83.65
   0   3 -29   -8.72   70.95
   0  -3  29   -5.17   59.91
   0   3  29   44.30   63.65
   0   3 -29   19.80   64.01
   0  -3 -29   10.29   70.82
   0   3 -30  266.23   76.40
   0  -3 -30  278.49   87.68
   0   3 -30  368.39   73.28
   0  -3  30  223.49   56.77
   0   3  30  198.00   63.87
   0   3 -30  214.48   70.77
   0  -3 -30  151.04   62.92
   0  -4   0  103.66   58.05
   0   4   0   50.00   56.56
   0   4   0  104.95   42.65
   0  -4   0   59.29   43.84
   0   4   0   82.35   41.42
   0  -4   0   70.06   50.27
   0   4   0   48.85   42.81
   0  -4  -1   28.08   57.48
   0   4   1   11.40   50.33
   0  -4   1   18.17   52.23
   0   4  -1   14.14   42.22
   0   4   1   14.55   36.46
   0  -4  -1   37.44   42.61
   0   4  -1  -18.16   39.22
   0  -4   1   17.00   47.47
   0   4   1    1.24    1.36
   0  -4  -1    8.91   35.80
   0   4  -1   25.77   43.03
   0   4   1   17.33   40.85
   0  -4  -2   51.65   55.65
   0   4   2   63.16   59.29
   0  -4   2  -12.46   90.61
   0   4   2   10.44   35.17
   0  -4  -2   27.37   33.20
   0  -4   2   33.89   43.53
   0   4   2   42.11   40.10
   0  -4  -2   18.84   42.09
   0  -4  -2   42.35   42.32
   0   4   2   12.30   38.99
   0  -4  -3 4353.97  180.38
   0   4   3 3936.66  261.97
   0   4   3 3927.69  235.80
   0  -4  -3 3780.28  227.13
   0   4   3 4136.44  112.89
   0  -4  -3 3805.89  226.12
   0  -4  -3 3727.55  224.54
   0   4   3 3905.47  233.27
   0  -4  -3 3952.06  235.44
   0   4  -4 3483.31  230.25
   0  -4  -4 3446.39  219.44
   0   4   4 2688.78  180.48
   0   4   4 3453.43  217.83
   0  -4  -4 3500.89  216.27
   0   4   4 3513.91  226.98
   0  -4  -4 2667.99  168.95
   0  -4  -4 3410.12  208.87
   0   4   4 3026.44  187.47
   0  -4   4 3009.74  187.76
   0  -4  -4 2974.57  186.03
   0   4  -5   48.92   49.92
   0  -4   5   51.14   54.79
   0  -4  -5   47.67   46.45
   0  -4  -5   -3.49   38.97
   0  -4  -5   28.15   40.54
   0   4   5   10.58   30.66
   0  -4   5   11.46   39.00
   0   4  -6  283.45   55.03
   0  -4   6  291.82   58.81
   0  -4  -6  228.15   44.83
   0   4  -6  275.83   44.95
   0  -4  -6  249.25   37.91
   0   4   6  227.18   37.64
   0  -4   6  255.70   40.64
   0   4  -6  259.98   41.70
   0   4  -7   40.67   41.66
   0  -4   7   -4.81   43.92
   0   4  -7   36.75   74.48
   0  -4   7  -11.78   40.09
   0  -4  -7   24.53   40.45
   0   4   7   16.17   39.04
   0  -4   7   20.79   32.88
   0   4  -7   18.99   41.39
   0   4  -8 2330.64  153.61
   0  -4   8 3129.93  200.74
   0   4  -8 2368.86  146.40
   0  -4   8 3050.26  189.65
   0  -4  -8 2668.36  169.41
   0   4   8 2651.55  169.02
   0  -4   8 2862.54  178.00
   0   4  -8 2912.92  182.13
   0   4  -8 2474.06  157.85
   0   4  -9   33.78   51.94
   0  -4   9   84.90   75.73
   0   4   9   25.88   60.56
   0  -4   9   -2.15   40.79
   0   4   9   12.39   44.57
   0  -4   9   44.56   38.02
   0   4  -9   21.35   43.87
   0   4   9   34.10   38.03
   0   4  -9   36.55   36.01
   0  -4  -9   38.82   39.03
   0   4   9  -26.61   38.95
   0   4 -10 6180.95  445.78
   0  -4  10 6682.87  480.20
   0   4  10 4799.51  376.12
   0   4 -10 5492.61  395.92
   0  -4  10 5921.04  421.02
   0  -4 -10 4121.20  306.49
   0   4  10 5749.42  410.84
   0  -4  10 5673.92  405.65
   0   4 -10 5278.62  375.90
   0   4  10 5691.22  405.11
   0   4 -10 5710.46  406.69
   0  -4 -10 5837.60  415.92
   0   4  10 5097.96  371.75
   0   4 -11  550.73   72.28
   0  -4  11  657.49   76.52
   0  -4 -11  362.99   79.44
   0   4  11  544.11   80.05
   0   4 -11  518.38  156.59
   0  -4  11  519.10   55.49
   0  -4 -11  485.08   58.53
   0   4 -11  677.63   66.68
   0   4  11  538.05   59.45
   0  -4  11  444.30   71.61
   0   4 -11  520.60   56.74
   0   4  11  605.33   61.43
   0   4 -11  556.63   64.98
   0  -4  11  531.19   59.00
   0  -4 -11  450.01   50.10
   0   4  11  442.54   54.41
   0   4 -12 2684.09  261.67
   0  -4  12 2508.85  242.43
   0  -4 -12 2136.04  262.48
   0   4  12 2068.74  223.85
   0   4 -12 2817.45  268.70
   0  -4  12 2901.52  275.28
   0  -4 -12 2277.93  266.02
   0  -4 -12 2236.73  220.21
   0   4 -12 2514.43  239.62
   0   4  12 2301.35  224.71
   0   4  12 2373.41  227.60
   0  -4  12 2586.83  247.78
   0   4 -12 2581.01  245.39
   0   4  12 2438.96  231.77
   0   4 -12 2504.62  238.47
   0  -4  12 2508.20  237.33
   0  -4 -12 2455.58  236.19
   0   4  12 1765.16  137.25
   0   4 -13  182.56   54.81
   0  -4 -13  152.25   50.89
   0  -4  13  130.50   61.15
   0   4  13  125.39   67.99
   0   4 -13  171.69   45.25
   0  -4  13  134.40   47.95
   0  -4 -13  127.50   45.11
   0  -4 -13   91.02   50.11
   0   4 -13  140.55   54.53
   0   4  13  128.09   41.70
   0   4  13  151.82   41.82
   0  -4  13  145.88   44.51
   0   4 -13  123.54   45.39
   0   4  13  129.55   37.90
   0   4 -13  146.67   40.96
   0  -4  13  106.34   40.22
   0  -4 -13  163.58   42.00
   0   4  13  148.55   37.43
   0   4 -14  666.90   79.04
   0  -4 -14  669.90  100.06
   0  -4  14  832.60   98.96
   0   4  14  608.09  107.49
   0   4 -14  905.23   97.11
   0  -4  14  801.60   89.77
   0  -4 -14  619.58  103.93
   0  -4 -14  656.57   80.05
   0   4 -14  988.36  106.28
   0   4  14  617.16   67.97
   0  -4  14  827.11   90.22
   0   4 -14  791.53   88.37
   0   4  14  779.93   85.15
   0   4 -14  809.72   90.59
   0  -4  14  810.61   88.37
   0  -4 -14  714.19   82.95
   0   4  14  634.33   83.02
   0   4 -15 1218.25  113.87
   0  -4 -15 1369.64  183.89
   0  -4  15 1530.89  168.36
   0   4  15 1265.75  172.02
   0   4 -15 1307.55  139.33
   0  -4  15 1528.57  160.21
   0  -4 -15 1213.07  154.86
   0  -4 -15 1229.53  142.82
   0   4 -15 1436.14  152.46
   0   4  15 1156.68  133.10
   0   4  15 1086.85  100.31
   0  -4  15 1539.75  160.26
   0   4 -15 1507.90  157.24
   0   4  15 1356.08  143.13
   0   4 -15 1556.40  163.72
   0  -4  15 1625.02  170.25
   0  -4 -15 1355.37  144.78
   0   4  15 1214.65  116.28
   0   4 -16   51.89   38.71
   0  -4 -16   75.15   65.33
   0  -4  16   83.55   62.51
   0   4  16   16.65   60.76
   0   4 -16   51.65   41.41
   0  -4 -16   51.60   37.09
   0  -4  16   33.63   45.27
   0  -4 -16  104.88   43.53
   0   4  16   47.54   43.46
   0   4 -16   52.23   44.06
   0   4  16   28.59   36.96
   0  -4  16   42.26   39.58
   0   4 -16   35.94   45.28
   0   4  16   69.09   40.65
   0   4 -16   57.41   47.01
   0  -4  16   66.57   44.23
   0  -4 -16   52.97   44.84
   0   4  16  104.52   43.59
   0   4 -17  796.18   93.82
   0  -4 -17  774.64  104.81
   0  -4  17 1083.35  144.68
   0   4 -17  949.09  105.40
   0  -4 -17  716.79   99.35
   0  -4  17 1102.03  133.46
   0   4  17  687.04  109.39
   0   4 -17  848.96   95.69
   0   4  17  629.04   77.75
   0  -4  17 1005.36  110.94
   0   4 -17  841.34   91.84
   0   4  17  925.35  104.28
   0   4 -17 1009.09  112.04
   0  -4 -17  887.85  104.53
   0   4 -18  186.19   45.95
   0  -4 -18  178.05   54.88
   0  -4  18  188.51   49.97
   0   4 -18  203.99   49.38
   0  -4 -18  166.13   48.66
   0  -4  18  205.57   59.45
   0   4  18   69.20   42.09
   0   4 -18  185.41   44.47
   0   4  18  104.49   35.77
   0  -4  18  204.68   44.06
   0   4  18  123.80   43.31
   0   4 -18  187.74   53.17
   0  -4 -18  150.55   49.45
   0   4 -19  110.86   60.63
   0  -4 -19   47.14   66.45
   0  -4  19  151.90   56.80
   0   4 -19   92.35   46.00
   0  -4 -19  151.70   46.58
   0   4  19   84.41   54.64
   0   4 -19  154.00   56.94
   0  -4  19  114.91   52.98
   0   4  19   76.60   44.85
   0   4 -19   93.84   47.60
   0  -4 -19  118.48   46.43
   0   4 -20 1232.13  161.08
   0  -4 -20 1165.00  176.41
   0  -4  20 1156.57  150.34
   0   4 -20  935.74  114.67
   0  -4 -20  936.41  133.81
   0   4 -20 1109.48  138.00
   0  -4  20 1213.48  146.94
   0   4  20 1165.11  145.14
   0   4 -20 1331.03  161.39
   0  -4 -20 1046.96  140.99
   0   4 -21   55.97   63.18
   0  -4 -21   85.80   70.87
   0  -4  21  103.19   55.11
   0   4 -21   70.61   38.17
   0  -4 -21   56.79   47.37
   0  -4  21    1.70   47.12
   0   4  21   48.60   49.45
   0   4 -21   64.69   43.21
   0  -4 -21   31.06   41.09
   0   4 -22  294.33   63.97
   0  -4 -22  168.19   55.79
   0   4 -22  317.19   57.55
   0  -4 -22  165.69   55.02
   0  -4  22  298.72   58.44
   0   4  22  280.56   58.07
   0   4 -22  288.26   57.30
   0  -4 -22  171.02   53.02
   0   4 -23   45.83   56.80
   0  -4 -23   10.60   67.81
   0   4 -23   50.46   54.90
   0  -4 -23   12.69   57.79
   0  -4  23   34.27   42.90
   0   4  23   77.31   44.89
   0   4 -23  104.53   51.85
   0  -4 -23   24.63   47.88
   0   4 -24 1419.95  198.32
   0  -4 -24 1270.47  192.01
   0   4 -24 1514.95  204.86
   0  -4 -24 1039.16  161.33
   0  -4  24 1359.63  180.35
   0   4  24 1296.02  186.13
   0   4 -24 1564.31  210.16
   0  -4 -24 1177.36  174.46
   0   4 -25   -1.80   70.40
   0  -4 -25  -18.89   93.37
   0   4 -25   10.04   55.06
   0  -4 -25   10.42   53.36
   0  -4  25   72.62   49.32
   0   4  25   91.91   51.20
   0   4 -25    0.71   49.48
   0  -4 -25    4.07   56.19
   0   4 -26   -6.29   78.84
   0  -4 -26   74.80   65.53
   0   4 -26   -8.19   53.89
   0  -4 -26    3.80   59.92
   0  -4  26   23.78   56.98
   0   4  26  -24.55   56.34
   0   4 -26   47.69   57.24
   0  -4 -26   21.28   51.24
   0   4 -27   37.71   69.93
   0  -4 -27   17.57   94.88
   0   4 -27   37.95   60.70
   0  -4  27   40.74   47.02
   0   4  27   -9.71   56.30
   0   4 -27    9.29   50.30
   0  -4 -27   41.96   60.87
   0   4 -28   13.15   69.22
   0  -4 -28  -49.19   82.48
   0   4 -28    6.86   59.46
   0  -4  28    0.36   55.58
   0   4  28  -35.34   63.18
   0   4 -28   29.85   51.35
   0  -4 -28   34.71   60.30
   0   4 -29    4.62   72.01
   0  -4 -29   37.40   82.07
   0   4 -29   -7.08   65.87
   0  -4  29   71.36   69.48
   0   4  29  102.37   52.38
   0   4 -29  -26.15   46.11
   0  -4 -29    6.05   54.13
   0  -4 -30   49.12   73.81
   0   4 -30  -22.61   61.97
   0  -4  30   20.94   57.46
   0   4  30  -31.87   63.33
   0   4 -30  -15.47   60.42
   0  -4 -30   13.27   60.83
   0  -5   0   24.98   48.55
   0   5   0  -16.62   44.57
   0   5   0   -8.81   37.92
   0  -5   0   27.14   53.65
   0   5   0   -4.41   29.97
   0  -5   0   -9.21   36.53
   0   5   0   -2.75   30.40
   0  -5  -114178.50  490.51
   0   5   112993.13  410.62
   0  -5   114274.30  448.84
   0   5  -113016.98  408.29
   0  -5  -114144.14  437.07
   0  -5   113017.12  401.54
   0   5   113066.94  403.62
   0   5  -113293.57  409.90
   0   5   111585.83  357.27
   0  -5  -2 4630.87  271.08
   0   5   2 4766.18  236.70
   0  -5   2 4400.91  220.64
   0   5  -2 4352.77  232.92
   0   5   2 4415.83  167.36
   0  -5  -2 4391.09  167.65
   0   5  -2 3571.79  215.52
   0  -5   2 4835.82  179.12
   0   5   2 4453.93  177.98
   0  -5  -2 4353.84  160.99
   0  -5  -2 3889.08  233.35
   0   5   2 4273.39  109.58
   0  -5   3  382.41   62.64
   0  -5  -3  416.89   84.79
   0   5   3  347.73   58.49
   0  -5   3  452.79  155.84
   0   5   3  400.70   49.67
   0  -5  -3  335.46   42.38
   0  -5   3  433.49   55.22
   0   5   3  416.05   49.97
   0  -5  -3  382.82   48.15
   0  -5  -3  419.07   46.84
   0   5   3  402.00   47.89
   0  -5   3  338.24   40.12
   0  -5  -3  442.82   49.54
   0   5   4 8910.86  397.86
   0  -5  -4 9092.23  295.37
   0   5   4 9637.32  312.27
   0  -5  -4 9058.18  293.27
   0   5   4 9682.76  313.17
   0   5  -5 3086.83  200.94
   0  -5   5 3259.58  211.41
   0  -5  -5 2537.26  197.49
   0   5   5 2905.59  226.20
   0  -5  -5 2654.28  167.94
   0   5   5 2448.47  161.28
   0  -5  -5 2846.64  178.36
   0  -5  -5 2862.28  184.41
   0   5   5 2648.65  166.05
   0  -5   5 2625.32  163.49
   0  -5  -5 2349.98  149.21
   0   5  -6  141.07   55.76
   0  -5   6  201.26   55.23
   0  -5  -6  104.37   44.21
   0  -5  -6  145.89   41.51
   0  -5  -6  119.45   43.75
   0  -5  -6  152.87   43.13
   0   5   6  105.64   41.30
   0  -5   6  131.77   36.94
   0   5  -6   64.88   37.40
   0  -5  -6   96.99   32.82
   0   5  -7 1735.33  118.71
   0  -5   7 1854.88  134.78
   0  -5  -7 1321.08  161.63
   0  -5  -7 1561.74  101.74
   0   5  -7 1834.12  128.03
   0  -5  -7 1534.72   98.77
   0   5   7 1601.03  101.68
   0  -5   7 1650.32  101.98
   0   5  -7 1524.28   94.39
   0   5  -8 2607.04  203.56
   0  -5   8 2903.33  226.00
   0  -5  -8 2077.53  163.70
   0   5  -8 2632.87  202.72
   0  -5   8 2772.22  210.35
   0  -5  -8 2404.48  196.66
   0   5   8 2051.77  155.57
   0  -5   8 2356.28   82.25
   0   5  -8 2655.69  201.07
   0   5  -9 1326.31  114.65
   0  -5   9 1676.95  144.02
   0   5  -9 1519.20  181.72
   0  -5   9 1685.36  136.70
   0  -5  -9 1275.48  113.49
   0   5   9 1582.40  131.47
   0  -5   9 1722.16  139.91
   0   5  -9 1558.62  126.35
   0   5 -10  936.33   84.39
   0  -5  10  848.45   72.75
   0   5 -10  941.81  102.19
   0  -5  10  971.62   62.47
   0   5  10  884.28   74.15
   0  -5  10  893.83   68.79
   0   5 -10  896.90   74.76
   0   5 -10  840.13   65.86
   0   5 -11 2111.62  212.50
   0  -5  11 2356.57  231.28
   0   5  11 1569.58  171.60
   0   5 -11 2316.37  224.14
   0  -5  11 1951.23  187.78
   0   5  11 1881.64  185.08
   0  -5  11 1723.67  130.77
   0   5 -11 1727.21  133.90
   0   5  11 1702.70  132.02
   0   5 -11 2010.35  194.20
   0  -5 -11 1923.24  189.75
   0   5  11 1365.36  126.47
   0   5 -12   20.08   37.54
   0  -5  12   -4.07   54.07
   0   5  12   59.88   58.78
   0  -5  12   27.14   45.31
   0  -5 -12    9.45   49.08
   0   5 -12   22.26   37.14
   0   5  12   27.03   41.78
   0  -5  12    7.93   36.62
   0   5 -12  -30.84   43.25
   0   5  12   41.45   40.04
   0   5 -12   11.44   34.73
   0  -5  12   24.28   45.72
   0  -5 -12   29.22   33.33
   0   5  12   -4.55   38.92
   0   5 -13 1486.09  153.44
   0  -5  13 1399.62   80.82
   0  -5 -13  963.31  127.90
   0   5  13 1117.21  150.92
   0   5 -13 1530.28  151.16
   0  -5  13 1521.97  148.55
   0  -5 -13 1076.26  134.00
   0  -5 -13 1213.52  126.02
   0   5 -13 1352.28  133.78
   0   5  13 1246.95  122.86
   0  -5  13 1498.79  145.34
   0   5 -13 1336.08  128.51
   0   5  13 1376.49   72.97
   0   5 -13 1100.67  105.47
   0  -5  13 1291.43  124.15
   0  -5 -13 1289.64  124.70
   0   5  13 1251.76  124.43
   0   5 -14    6.58   50.24
   0  -5 -14    0.56   43.54
   0  -5  14   -1.68   53.38
   0   5  14  -71.51   60.07
   0   5 -14  -38.13   37.47
   0  -5  14  -20.96   43.32
   0  -5 -14  -14.83   33.12
   0  -5 -14  -20.73   49.49
   0   5 -14   -0.27   55.24
   0   5  14   18.89   36.10
   0   5  14   19.79   54.02
   0  -5  14   24.01   40.93
   0   5 -14   28.57   42.70
   0   5  14   13.19   35.52
   0   5 -14   20.72   38.78
   0  -5  14   19.60   42.95
   0  -5 -14   -7.58   35.65
   0   5  14  -16.89   47.64
   0   5 -15  644.48   86.82
   0  -5 -15  424.76   66.85
   0  -5  15  728.95   95.34
   0   5  15  490.51   86.43
   0   5 -15  787.52   86.25
   0  -5  15  780.37   86.68
   0  -5 -15  499.92   82.48
   0  -5 -15  463.80   57.19
   0   5 -15  637.74   81.67
   0   5  15  442.50   50.00
   0   5  15  598.13   76.28
   0  -5  15  529.77   62.76
   0   5 -15  647.08   74.17
   0   5  15  609.84   69.45
   0   5 -15  605.08   67.28
   0  -5  15  563.09   66.05
   0  -5 -15  605.53   71.24
   0   5  15  602.43   82.54
   0   5 -16  652.91   76.05
   0  -5 -16  349.61   59.32
   0  -5  16  651.34   96.56
   0   5  16  500.98   89.09
   0   5 -16  609.82   69.03
   0  -5  16  666.31   72.82
   0  -5 -16  480.97   74.24
   0   5 -16  588.47   68.67
   0   5  16  428.65   65.57
   0   5  16  557.90   69.72
   0  -5  16  530.62   55.92
   0   5 -16  443.33   48.01
   0   5  16  541.74   60.76
   0   5 -16  556.06   61.66
   0  -5  16  619.83   65.73
   0  -5 -16  558.13   64.33
   0   5  16  484.86   75.03
   0   5 -17    8.91   49.68
   0  -5 -17  -16.83   51.84
   0  -5  17  -19.10   55.99
   0   5 -17  -39.92   46.32
   0  -5 -17   -0.24   44.45
   0  -5  17  -42.82   46.91
   0   5 -17   -6.31   43.32
   0   5  17   -8.23   44.51
   0   5  17   -2.42   44.58
   0  -5  17   22.44   37.43
   0   5 -17   18.32   48.74
   0   5  17   23.27   45.03
   0   5 -17   -9.33   38.32
   0  -5 -17  -22.61   39.88
   0   5 -18  368.55   59.02
   0  -5 -18  300.73   65.51
   0  -5  18  343.08   62.64
   0   5 -18  300.78   61.51
   0  -5 -18  258.84   54.88
   0   5  18  233.62   63.20
   0   5 -18  366.93   59.19
   0   5  18  238.99   53.92
   0  -5  18  303.39   43.31
   0   5  18  314.68   50.92
   0   5 -18  370.69   51.93
   0  -5 -18  283.50   50.79
   0   5 -19 1386.97  142.67
   0  -5 -19 1086.98  148.72
   0  -5  19 1080.45  125.07
   0   5 -19 1374.10  138.84
   0  -5 -19 1031.69  142.96
   0   5  19  845.25  112.73
   0   5 -19 1105.09  111.57
   0  -5  19 1179.28  114.98
   0   5  19 1395.78  145.28
   0   5 -19 1262.91  124.00
   0  -5 -19 1093.73  121.11
   0   5 -20  192.54   55.10
   0  -5 -20   95.03   69.40
   0  -5  20  129.64   59.71
   0   5 -20   81.04   71.53
   0  -5 -20  110.09   41.02
   0   5  20   63.58   53.10
   0  -5  20  103.23   41.57
   0   5  20  100.13   42.67
   0   5 -20  142.77   47.31
   0  -5 -20  162.94   52.20
   0   5 -21 1361.21  151.17
   0  -5 -21 1125.54  154.66
   0  -5  21 1396.75  163.68
   0   5 -21 1374.30  154.33
   0  -5 -21 1096.86  153.35
   0  -5  21 1253.68  132.73
   0   5  21 1303.09  146.78
   0   5 -21 1328.37  139.12
   0  -5 -21 1068.50  130.22
   0   5 -22  271.77   58.19
   0  -5 -22  147.40   58.73
   0   5 -22  220.72   56.32
   0  -5 -22  125.72   45.45
   0  -5  22  153.06   43.45
   0   5  22  135.67   41.02
   0   5 -22  250.50   48.71
   0  -5 -22  196.16   50.21
   0   5 -23   10.11   69.82
   0  -5 -23   41.28   53.19
   0   5 -23  -31.86   41.57
   0  -5 -23   -7.20   52.83
   0  -5  23   15.73   48.00
   0   5  23    3.48   45.75
   0   5 -23   -5.04   53.54
   0  -5 -23  -29.35   38.22
   0   5 -24  239.87   65.94
   0  -5 -24  158.51   71.29
   0   5 -24  202.97   54.48
   0  -5 -24  137.52   57.85
   0  -5  24  186.34   58.14
   0   5  24  207.64   53.96
   0   5 -24  179.90   47.96
   0  -5 -24  195.36   52.93
   0   5 -25  273.80   64.04
   0  -5 -25  201.56   87.42
   0   5 -25  300.14   64.02
   0  -5 -25  137.38   55.04
   0  -5  25  308.43   64.28
   0   5  25  214.21   58.78
   0   5 -25  277.43   47.96
   0  -5 -25  237.60   59.01
   0   5 -26   -1.27   61.97
   0  -5 -26  130.54   78.44
   0   5 -26   94.28   64.75
   0  -5  26   47.60   52.67
   0   5  26   64.05   55.48
   0   5 -26   45.43   57.42
   0  -5 -26   88.74   56.11
   0   5 -27  150.56   64.07
   0  -5 -27  143.20   82.56
   0   5 -27  208.55   68.84
   0  -5  27  205.18   63.10
   0   5  27  140.64   58.63
   0   5 -27  177.59   62.36
   0  -5 -27  108.57   56.81
   0   5 -28    1.43   76.56
   0  -5 -28   62.78   90.40
   0   5 -28    9.73   55.11
   0  -5  28    3.67   57.79
   0   5  28   50.51   61.84
   0   5 -28  -65.90   58.46
   0  -5 -28   15.79   55.47
   0  -5 -29   79.04   82.78
   0   5 -29   25.94   63.02
   0  -5  29   50.34   47.52
   0   5  29   55.35   57.39
   0   5 -29   50.16   59.68
   0  -5 -29    2.63   66.33
   0  -5 -30  148.47   90.56
   0   5 -30  151.94   68.64
   0  -5  30  231.44   69.73
   0   5  30  113.73   58.38
   0   5 -30  250.75   67.90
   0  -5 -30  195.18   69.48
   0  -6   0 2169.50  167.33
   0   6   0 2287.15  156.36
   0   6   0 2572.38  165.65
   0  -6   0 2364.40  152.25
   0   6   0 2359.38  151.04
   0  -6   0 2497.62  159.53
   0   6   0 2186.07  140.75
   0  -6  -1 6084.51  361.38
   0   6   1 5793.83  306.89
   0   6  -1 5140.72  185.30
   0   6   1 4673.22  165.78
   0   6  -1 4787.81  168.36
   0  -6   1 5593.82  195.76
   0   6   1 5689.17  199.71
   0   6  -1 5693.69  197.42
   0  -6  -1 4311.79  108.89
   0   6  -1 4466.65  163.57
   0  -6  -2 2929.51  270.06
   0   6   2 3184.11  208.82
   0  -6   2 2810.87  178.29
   0   6  -2 2795.49  175.91
   0   6   2 2766.89  171.32
   0  -6  -2 3053.76  190.70
   0   6  -2 2717.89  168.30
   0  -6   2 2849.54  176.00
   0   6   2 2727.94  173.29
   0  -6  -2 2791.92  171.25
   0   6  -2 2637.40  162.00
   0  -6  -2 2633.55  167.03
   0   6   2 2732.82  169.25
   0  -6   3 8393.85  286.80
   0  -6  -310009.34  447.22
   0   6   3 7561.93  326.57
   0  -6   3 8860.36  294.36
   0   6   3 9312.78  303.00
   0  -6  -3 7540.57  251.77
   0   6  -3 7373.34  254.64
   0  -6  -3 8883.69  287.28
   0  -6  -3 8207.38  275.17
   0   6   3 9289.20  298.82
   0  -6  -3 7467.83  243.89
   0  -6   4  386.52   57.49
   0  -6  -4  321.88   55.50
   0   6   4  276.42   53.69
   0  -6   4  325.18   46.94
   0   6   4  317.97   43.33
   0  -6  -4  273.74   41.91
   0  -6   4  390.11   50.56
   0   6   4  294.27   42.61
   0  -6  -4  326.80   45.32
   0  -6  -4  297.67   42.84
   0   6   4  262.41   39.58
   0  -6   4  293.18   44.59
   0  -6  -4  307.79   43.93
   0  -6   5 5434.57  195.30
   0  -6  -5 6288.36  356.64
   0   6   5 6383.28  265.59
   0   6   5 6701.55  230.11
   0  -6  -5 6311.99  226.98
   0   6   5 6881.81  254.23
   0  -6  -5 6280.31  238.34
   0  -6  -5 6673.18  237.46
   0   6   5 6280.66  213.74
   0  -6   5 6266.52  217.16
   0  -6   5 5519.56  189.88
   0  -6  -5 7166.93  257.80
   0   6  -6   80.58   38.60
   0  -6   6  134.69   52.13
   0  -6  -6   89.53   46.31
   0   6   6  112.50   53.31
   0  -6  -6  119.40   41.51
   0   6   6   56.55   41.95
   0  -6  -6   95.63   44.62
   0  -6  -6  132.60   42.56
   0   6   6  101.73   47.26
   0  -6   6   94.63   35.68
   0  -6  -6   89.60   35.64
   0   6  -7   29.66   48.60
   0  -6   7   24.03   45.45
   0  -6  -7   51.91   39.60
   0   6   7   57.11   53.41
   0  -6  -7   36.21   35.19
   0   6  -7   39.30   36.70
   0  -6  -7   79.31   45.42
   0  -6  -7   29.14   37.77
   0   6   7   24.63   45.42
   0  -6   7   93.21   37.75
   0   6  -7   47.30   41.23
   0  -6  -7   26.33   35.32
   0   6  -8  145.15   49.79
   0  -6   8  232.31   57.36
   0  -6  -8  161.65   55.52
   0  -6  -8  152.96   42.12
   0   6  -8  155.01   36.80
   0  -6   8  130.26   44.48
   0  -6  -8   82.26   38.15
   0  -6  -8  114.35   45.48
   0   6   8  155.03   44.15
   0  -6   8  214.21   41.54
   0   6  -8  138.22   40.30
   0   6  -9 4562.66  336.72
   0  -6   9 4571.42  335.23
   0  -6  -9 3391.68  346.55
   0  -6  -9 3769.85  289.69
   0   6  -9 4771.76  343.91
   0  -6   9 4643.59  334.70
   0  -6  -9 4120.29  307.90
   0   6   9 4216.14  307.55
   0  -6   9 4447.00  321.97
   0   6  -9 4498.35  326.56
   0   6 -10  105.85   49.06
   0  -6  10   98.97   50.09
   0  -6 -10  102.19   45.50
   0   6 -10  149.73   66.16
   0  -6  10   92.14   47.69
   0  -6 -10   86.60   41.86
   0   6  10  118.75   44.19
   0  -6  10  168.96   38.94
   0   6 -10  124.10   42.76
   0   6 -11 1323.41  114.96
   0  -6  11 1646.52  138.62
   0  -6 -11 1377.25  142.60
   0   6 -11 1710.65  143.24
   0  -6  11 1618.47  130.88
   0  -6 -11 1337.29  112.85
   0   6  11 1374.19  119.39
   0  -6  11 1475.04  119.16
   0   6 -11 1610.29  129.31
   0   6 -11 1412.56  114.72
   0   6 -12   92.25   42.81
   0  -6  12  132.69   50.59
   0   6 -12   97.19   80.68
   0  -6  12  134.57   43.23
   0   6  12   88.62   43.68
   0  -6  12   97.93   42.60
   0   6 -12  125.85   47.91
   0   6  12  126.99   40.88
   0   6 -12  127.86   44.40
   0  -6 -12   96.38   41.51
   0   6 -13  309.06   51.81
   0  -6  13  437.61   69.31
   0   6  13  312.60   64.98
   0   6 -13  346.23   48.60
   0  -6  13  374.90   54.69
   0   6  13  314.96   56.44
   0  -6  13  361.35   50.04
   0   6 -13  304.58   44.88
   0   6  13  326.69   45.24
   0   6 -13  333.26   40.19
   0  -6  13  369.22   51.10
   0  -6 -13  348.26   51.01
   0   6  13  277.75   52.73
   0   6 -14   35.15   52.48
   0  -6  14  -13.46   50.06
   0   6  14   78.28   56.23
   0   6 -14    8.42   40.75
   0  -6  14   26.88   40.11
   0  -6 -14    6.23   42.80
   0   6 -14    9.87   52.80
   0   6  14  -12.15   51.98
   0  -6  14    2.39   38.98
   0   6 -14  -45.93   35.25
   0   6  14   21.15   33.30
   0   6 -14  -21.03   38.73
   0  -6  14    0.56   45.84
   0  -6 -14  -19.09   37.81
   0   6  14   16.88   31.86
   0   6 -15  140.88   48.42
   0  -6 -15   82.12   49.54
   0  -6  15  111.52   57.70
   0   6  15  124.01   70.71
   0   6 -15  101.25   48.99
   0  -6  15  169.08   61.16
   0  -6 -15   44.17   45.79
   0  -6 -15   68.20   51.01
   0   6 -15  104.44   46.25
   0   6  15   63.91   42.31
   0   6  15  100.57   43.60
   0  -6  15   53.20   46.24
   0   6 -15   73.83   44.57
   0   6  15   70.34   33.64
   0   6 -15  117.99   40.49
   0  -6  15  154.28   47.32
   0  -6 -15   84.76   46.40
   0   6  15   41.63   39.32
   0   6 -16 1325.95  159.35
   0  -6 -16 1101.74  189.00
   0  -6  16 1559.38  191.04
   0   6 -16 1465.73  172.21
   0  -6  16 1558.23  181.62
   0  -6 -16  918.98  129.76
   0   6 -16 1470.33  173.93
   0   6  16 1017.12  140.23
   0   6  16 1104.35  135.61
   0  -6  16 1198.63  139.09
   0   6 -16 1227.53  145.17
   0   6  16 1268.65  150.38
   0   6 -16 1440.35  167.64
   0  -6 -16 1067.57  136.54
   0   6 -17 1151.18  145.59
   0  -6 -17  912.44  141.87
   0  -6  17 1245.10  167.07
   0   6 -17 1110.00  131.75
   0  -6 -17  896.10  137.39
   0   6 -17 1266.76  153.00
   0   6  17  737.78  101.33
   0   6  17  835.06   71.28
   0  -6  17  921.11  108.44
   0   6  17 1032.96  128.38
   0   6 -17 1181.56  141.25
   0  -6 -17 1007.23  127.07
   0   6 -18   79.90   57.32
   0  -6 -18   12.99   67.55
   0  -6  18   39.64   61.30
   0   6 -18   62.99   50.74
   0  -6 -18   30.50   47.99
   0   6 -18  110.65   57.34
   0   6  18   64.59   51.75
   0  -6  18   82.87   37.03
   0   6  18   69.17   40.84
   0   6 -18   76.43   49.59
   0  -6 -18   58.75   37.73
   0   6 -19  146.79   59.60
   0  -6 -19   70.60   69.74
   0  -6  19   75.82   61.81
   0   6 -19   78.78   40.24
   0  -6 -19   54.49   44.47
   0   6  19   49.84   41.79
   0  -6  19   94.76   46.96
   0   6  19  119.99   50.33
   0   6 -19   85.52   52.96
   0  -6 -19   39.22   50.59
   0   6 -20  105.11   65.70
   0  -6 -20   91.60   59.07
   0  -6  20   58.09   54.28
   0   6 -20  123.31   52.94
   0  -6 -20  105.72   49.33
   0   6  20   43.30   43.66
   0  -6  20   58.14   48.14
   0   6  20   77.70   49.25
   0   6 -20   97.62   43.73
   0  -6 -20   46.45   43.52
   0   6 -21  532.34   77.86
   0  -6 -21  448.35   88.38
   0  -6  21  540.78   86.84
   0   6 -21  552.77   78.04
   0  -6 -21  320.83   69.23
   0   6  21  273.60   70.20
   0  -6  21  532.07   68.22
   0   6  21  325.32   45.81
   0   6 -21  563.45   70.58
   0  -6 -21  403.17   53.57
   0   6 -22   12.89   71.96
   0  -6 -22   54.23   71.92
   0   6 -22  -31.69   48.58
   0  -6 -22   -7.30   44.19
   0   6  22    6.87   40.67
   0  -6  22   29.16   49.65
   0   6  22   46.34   52.47
   0   6 -22  -52.83   46.46
   0  -6 -22  -24.78   46.34
   0   6 -23 1080.37  148.27
   0  -6 -23  921.03  142.64
   0   6 -23 1116.25  144.34
   0  -6 -23  473.81   82.17
   0  -6  23  863.45  110.11
   0   6  23  800.19  112.58
   0   6 -23 1052.59  131.83
   0  -6 -23  770.78   77.28
   0   6 -24  -48.88   57.05
   0  -6 -24   13.17   56.77
   0   6 -24   51.07   58.29
   0  -6 -24   58.05   54.71
   0  -6  24  -22.87   39.24
   0   6  24   -7.56   39.21
   0   6 -24  -66.86   52.19
   0  -6 -24    4.21   58.54
   0   6 -25   -7.06   56.83
   0  -6 -25   28.70   80.08
   0   6 -25   63.37   59.16
   0  -6  25  121.37   40.70
   0   6  25   35.39   49.96
   0   6 -25  111.96   54.61
   0  -6 -25  -24.82   51.30
   0   6 -26  -16.88   69.83
   0  -6 -26   38.69   65.47
   0   6 -26  -12.99   46.08
   0  -6  26   46.01   52.95
   0   6  26   16.09   50.81
   0   6 -26   79.36   57.10
   0  -6 -26   65.60   52.96
   0   6 -27   -1.30   75.61
   0  -6 -27  -98.31   75.42
   0   6 -27   -8.22   44.68
   0  -6  27   68.85   56.44
   0   6  27   57.98   63.78
   0   6 -27   66.41   48.41
   0  -6 -27   26.64   61.13
   0  -6 -28   73.75   75.82
   0   6 -28  104.05   69.32
   0  -6  28  118.03   63.58
   0   6  28   61.67   63.91
   0   6 -28   62.41   57.79
   0  -6 -28   -9.01   60.74
   0  -6 -29  -41.02  102.57
   0   6 -29  133.74   58.64
   0  -6  29   49.20   67.42
   0   6  29   66.62   57.20
   0   6 -29  166.79   66.31
   0  -6 -29  104.24   62.27
   0  -6 -30  -27.60   74.10
   0   6 -30   13.63   57.83
   0  -6  30  -37.92   68.34
   0   6  30   43.27   58.39
   0   6 -30   36.83   63.26
   0  -6 -30   14.24   61.67
   0  -7   0   -1.22   43.84
   0   7   0   -6.64   44.68
   0   7   0  -21.59   39.18
   0  -7   0   13.87   41.81
   0   7   0    7.90   40.02
   0  -7   0   -8.00   34.25
   0   7   0   15.76   33.59
   0  -7  -1 3748.68  293.02
   0  -7   1 3688.98  244.22
   0   7   1 3702.80  245.04
   0   7  -1 3777.77  229.34
   0   7   1 3161.06  188.93
   0   7  -1 4092.69  113.19
   0  -7  -1 3711.49  231.37
   0  -7   1 4180.17  121.06
   0   7   1 3788.35  233.24
   0   7  -1 3959.69  234.86
   0  -7  -1 3317.04  200.74
   0  -7  -1 3509.44  213.97
   0   7   1 3944.90  235.67
   0   7  -1 3392.32  202.87
   0  -7  -2 5265.76  310.28
   0   7   2 4582.31  223.68
   0  -7   2 4511.31  186.51
   0   7  -2 5494.08  200.33
   0   7   2 5115.09  184.09
   0  -7  -2 5205.92  207.59
   0   7  -2 4015.62  233.21
   0  -7   2 5158.88  182.75
   0   7   2 5030.43  213.13
   0  -7  -2 4721.58  181.73
   0   7  -2 5927.40  210.19
   0  -7  -2 5189.63  187.01
   0   7   2 5205.56  184.48
   0  -7  -3   -0.04   46.61
   0   7   3   -2.56   54.59
   0  -7   3   62.80   41.35
   0   7   3   61.60   35.21
   0  -7  -3    8.08   43.69
   0   7  -3   32.95   35.55
   0  -7   3   28.77   41.16
   0   7   3   44.07   38.86
   0  -7  -3   40.67   43.49
   0  -7  -3   58.43   37.40
   0   7   3   38.88   36.71
   0  -7  -3   63.28   39.43
   0  -7   4  631.29   68.18
   0  -7  -4  681.18   78.15
   0   7   4  715.69   84.48
   0  -7   4  642.58   56.61
   0   7   4  631.12   59.40
   0  -7  -4  666.71   62.23
   0  -7   4  642.64   55.56
   0   7   4  512.85   46.07
   0  -7  -4  653.98   56.20
   0  -7  -4  607.55   54.79
   0   7   4  603.97   50.04
   0  -7   4  683.38   57.25
   0  -7  -4  641.88   52.69
   0  -7   5   31.51   56.64
   0  -7  -5   26.07   48.59
   0   7   5   10.33   61.74
   0  -7   5   30.29   38.62
   0   7   5   22.08   36.61
   0  -7  -5   19.64   34.96
   0  -7   5    6.54   34.78
   0   7   5   30.44   39.06
   0  -7  -5   26.32   38.55
   0  -7  -5   -3.70   27.48
   0   7   5    9.98   34.95
   0  -7   5   -7.62   28.00
   0  -7   5   17.74   26.72
   0  -7  -5   42.64   36.27
   0  -7   6  332.25   54.58
   0  -7  -6  277.33   66.97
   0   7   6  330.63   71.46
   0  -7   6  382.01   51.37
   0   7   6  325.21   45.52
   0  -7  -6  284.74   49.95
   0   7   6  306.40   49.92
   0  -7  -6  269.84   44.78
   0  -7  -6  286.39   37.52
   0   7   6  335.98   45.49
   0  -7   6  342.45   45.58
   0  -7   6  339.08   45.74
   0  -7  -6  418.32   56.41
   0   7  -7 2095.61  167.05
   0  -7   7 1981.47  154.96
   0  -7  -7 1837.74  194.68
   0   7   7 1775.11  167.13
   0  -7  -7 2114.46  182.64
   0   7   7 2415.74  201.43
   0  -7  -7 2140.77  180.27
   0  -7  -7 2205.31  184.54
   0   7   7 2265.59  173.78
   0  -7   7 1768.57  133.47
   0   7  -7 2316.35  177.38
   0  -7  -7 2280.35  175.06
   0   7   7 1814.47  141.52
   0   7  -8 3602.23  271.40
   0  -7   8 4173.28  311.26
   0  -7  -8 3440.91  308.39
   0   7   8 3048.54  266.53
   0  -7  -8 3073.13  249.86
   0   7  -8 3282.24  245.39
   0  -7  -8 3612.08  276.82
   0  -7  -8 3623.70  271.96
   0   7   8 3449.63  255.43
   0  -7   8 3720.99  271.00
   0   7  -8 3903.70  283.92
   0  -7  -8 2890.37  214.96
   0   7  -9   21.04   50.45
   0  -7   9   49.45   51.28
   0  -7  -9   42.66   45.28
   0   7   9   10.05   66.74
   0  -7  -9   14.50   36.00
   0  -7   9   32.81   39.21
   0  -7  -9   34.46   47.85
   0  -7  -9   11.57   31.09
   0   7   9   49.48   41.61
   0  -7   9   54.61   45.88
   0   7  -9   -1.18   37.16
   0   7 -10 3730.17  351.82
   0  -7  10 3880.25  363.72
   0  -7 -10 3175.42  363.57
   0  -7 -10 3114.00  299.27
   0   7 -10 4132.61  387.23
   0  -7  10 4026.07  372.45
   0  -7 -10 3010.51  293.28
   0  -7 -10 3750.67  365.79
   0   7  10 3371.13  317.56
   0  -7  10 3475.67  322.69
   0   7 -10 3941.19  365.74
   0   7 -11 1625.96  163.51
   0  -7  11 1826.48  178.74
   0  -7 -11 1143.39  117.21
   0   7 -11 1635.47  162.34
   0  -7  11 1816.95  171.83
   0  -7 -11 1398.25   80.59
   0   7  11 1562.60  155.55
   0  -7  11 1753.72  167.05
   0   7 -11 1665.06  157.01
   0   7 -12  249.71   63.00
   0  -7  12  221.47   52.28
   0  -7 -12  161.64   44.75
   0   7 -12  282.48   51.28
   0  -7  12  241.84   46.54
   0  -7 -12  208.75   42.33
   0   7  12  240.58   45.38
   0  -7  12  216.39   43.66
   0   7 -12  222.58   51.52
   0   7 -12  125.50   28.91
   0   7 -13   18.62   47.19
   0  -7  13    9.75   50.69
   0  -7 -13    9.86   37.57
   0   7 -13   14.25   41.62
   0  -7  13   20.32   38.67
   0   7  13   -9.60   48.66
   0  -7  13    1.01   35.99
   0   7 -13   11.68   38.86
   0   7  13  -15.61   34.94
   0   7 -13   -6.74   33.25
   0  -7 -13   14.57   36.51
   0   7 -14   63.30   49.00
   0  -7  14   42.97   52.04
   0   7  14    5.75   45.93
   0  -7 -14   38.59   37.19
   0   7 -14   63.81   60.00
   0  -7  14   37.63   53.51
   0   7  14   32.47   37.21
   0  -7  14   38.66   37.64
   0   7 -14   51.75   46.28
   0   7  14   61.22   37.33
   0   7 -14   -9.16   40.17
   0  -7  14   24.83   42.72
   0  -7 -14   30.79   40.29
   0   7  14   13.62   37.95
   0   7 -15  206.34   59.88
   0  -7  15  305.85   60.97
   0  -7 -15  108.32   43.54
   0   7 -15  222.68   50.05
   0  -7  15  234.97   51.97
   0   7 -15  242.69   54.83
   0   7  15  195.21   51.08
   0  -7  15  197.71   40.73
   0   7 -15  253.99   54.02
   0   7  15  155.71   40.83
   0   7 -15  221.53   44.18
   0  -7 -15  162.55   44.31
   0   7 -16   53.82   50.28
   0  -7 -16   -2.72   43.38
   0  -7  16   38.61   52.71
   0   7 -16   32.24   45.92
   0  -7 -16   34.73   44.21
   0   7 -16   87.36   49.73
   0   7  16   62.62   41.76
   0   7  16   30.61   42.95
   0  -7  16   27.52   42.74
   0   7  16   47.66   48.79
   0   7 -16   22.06   38.83
   0  -7 -16   39.73   35.91
   0   7 -17   31.36   44.37
   0  -7 -17   48.89   59.36
   0  -7  17   58.81   49.70
   0   7 -17   -0.12   43.89
   0  -7 -17    0.07   42.43
   0   7  17   20.89   40.47
   0   7  17   -6.27   50.80
   0  -7  17   17.10   45.73
   0   7  17   68.82   48.57
   0   7 -17   22.00   41.69
   0  -7 -17   35.42   45.08
   0   7 -18   -9.14   43.18
   0  -7 -18    9.74   65.14
   0  -7  18   14.14   69.36
   0   7 -18   29.98   70.20
   0  -7 -18  -20.40   41.06
   0   7  18   29.79   42.99
   0  -7  18   -8.49   50.31
   0   7  18   24.32   37.00
   0   7 -18   24.42   38.67
   0  -7 -18   -1.49   49.17
   0   7 -19  352.42   71.76
   0  -7 -19  279.15   77.94
   0  -7  19  389.80   66.18
   0   7 -19  398.77   62.54
   0  -7 -19  214.50   60.01
   0   7  19  189.64   51.00
   0  -7  19  337.22   51.80
   0   7  19  317.94   54.33
   0   7 -19  375.68   56.45
   0  -7 -19  210.87   37.19
   0   7 -20   63.35   60.95
   0  -7 -20   62.13   66.09
   0  -7  20   11.94   69.10
   0   7 -20   27.89   60.24
   0  -7 -20   18.76   53.03
   0   7  20   38.22   47.60
   0  -7  20   64.76   47.83
   0   7  20   20.32   50.48
   0   7 -20   -0.10   42.03
   0  -7 -20   27.11   47.58
   0   7 -21  290.26   77.73
   0  -7 -21  190.61   66.68
   0   7 -21  253.50   59.47
   0  -7 -21  150.74   51.17
   0   7  21  112.08   51.47
   0  -7  21  303.50   57.27
   0   7  21  156.55   52.03
   0   7 -21  264.10   50.43
   0  -7 -21  182.72   59.60
   0   7 -22  108.61   75.50
   0  -7 -22    4.17   70.93
   0   7 -22  107.88   52.94
   0  -7 -22   43.40   48.43
   0   7  22   39.30   41.14
   0  -7  22   77.19   56.02
   0   7  22  113.99   49.54
   0   7 -22   68.07   51.41
   0  -7 -22   68.58   47.53
   0   7 -23   27.15   66.10
   0  -7 -23   30.92   78.54
   0   7 -23   41.20   51.96
   0  -7 -23   58.74   51.23
   0  -7  23   69.55   56.51
   0   7  23   34.88   47.22
   0   7 -23   69.00   51.92
   0  -7 -23    2.73   50.11
   0   7 -24  -10.73   66.49
   0  -7 -24  -55.98   62.92
   0   7 -24   45.06   53.20
   0  -7 -24   42.15   48.70
   0  -7  24   28.73   56.84
   0   7  24  -24.95   50.91
   0   7 -24   24.79   50.58
   0  -7 -24   13.78   53.04
   0   7 -25  219.89   69.14
   0  -7 -25   71.06   59.67
   0   7 -25  126.19   54.00
   0  -7  25  158.93   53.90
   0   7  25   71.29   37.47
   0   7 -25  108.15   61.43
   0  -7 -25  130.87   52.39
   0   7 -26   97.34   64.31
   0  -7 -26  -21.67   71.26
   0   7 -26  196.64   54.80
   0  -7  26  107.85   50.93
   0   7  26   67.19   61.51
   0   7 -26   77.07   47.32
   0  -7 -26  -13.23   53.94
   0  -7 -27  -43.70   78.37
   0   7 -27   39.46   53.27
   0  -7  27   24.07   49.00
   0   7  27  -26.62   53.41
   0   7 -27   46.68   53.84
   0  -7 -27   53.04   61.24
   0  -7 -28   26.06   82.58
   0   7 -28  -22.57   63.40
   0  -7  28  -18.31   51.31
   0   7  28   17.91   52.36
   0   7 -28   57.23   53.79
   0  -7 -28  -13.88   55.66
   0  -7 -29   36.46   71.87
   0   7 -29  113.25   69.29
   0  -7  29   53.26   61.05
   0   7  29   75.30   61.35
   0   7 -29   18.83   60.33
   0  -7 -29   50.05   68.38
   0  -8   0 6418.04  353.61
   0   8   0 6713.06  272.64
   0   8   0 6626.32  230.16
   0  -8   0 5056.24  192.61
   0   8   0 5793.19  201.72
   0  -8   0 4896.99  189.00
   0  -8   0 4744.58  194.86
   0   8   0 5702.58  194.47
   0  -8  -1  219.48   48.89
   0  -8   1  210.45   49.13
   0   8   1  271.05   55.20
   0   8  -1  230.60   47.22
   0   8   1  198.62   36.37
   0   8  -1  198.19   39.79
   0  -8  -1  234.91   44.95
   0  -8   1  205.83   42.66
   0   8   1  215.71   45.25
   0   8  -1  215.91   36.38
   0  -8  -1  173.14   34.42
   0  -8  -1  146.81   32.53
   0   8   1  218.37   43.13
   0   8  -1  206.54   39.35
   0  -8  -2  729.86  102.31
   0  -8   2  729.21   87.31
   0   8   2  682.66   64.09
   0   8  -2  806.59   60.41
   0   8   2  739.89   51.45
   0   8  -2  675.98   47.50
   0  -8  -2  670.94   53.71
   0  -8   2  820.99   64.68
   0   8   2  777.40   55.49
   0  -8  -2  813.16   71.15
   0   8  -2  769.14   51.57
   0  -8  -2  601.04   44.46
   0   8   2  838.84   65.60
   0   8  -2  707.44   59.72
   0  -8  -3  691.25   90.18
   0   8   3  655.44   73.95
   0  -8   3  672.15   75.75
   0   8  -3  798.92   71.25
   0   8   3  552.82   51.58
   0  -8  -3  737.99   85.02
   0   8  -3  741.97   67.33
   0  -8   3  682.99   60.17
   0   8   3  637.14   59.11
   0  -8  -3  556.76   52.87
   0   8  -3  662.55   56.18
   0  -8  -3  680.83   64.94
   0   8   3  654.29   57.52
   0  -8  -3  588.69   53.98
   0  -8   4 5525.84  399.86
   0  -8  -4 5798.89  478.93
   0   8   4 5930.05  464.04
   0  -8   4 6437.33  493.41
   0   8   4 5754.73  419.02
   0  -8  -4 5564.21  438.80
   0   8  -4 6887.91  490.11
   0  -8   4 6423.90  454.28
   0   8   4 5220.70  380.74
   0  -8  -4 5668.58  412.87
   0  -8  -4 5909.53  423.44
   0   8   4 5932.60  420.93
   0  -8   4 4873.98  344.62
   0  -8  -4 5731.61  407.19
   0  -8   5 1293.37  121.18
   0  -8  -5 1302.62  149.29
   0   8   5 1210.21  127.87
   0  -8   5 1176.86  102.21
   0   8   5 1178.86  102.60
   0  -8  -5  891.76   89.62
   0  -8   5 1400.20  124.44
   0   8   5  987.83   96.62
   0  -8  -5  988.80   91.80
   0  -8  -5 1184.67  103.57
   0   8   5 1257.92  103.94
   0  -8   5 1252.31  107.38
   0  -8  -5 1165.25  106.83
   0  -8   6  846.99   82.45
   0  -8  -6  627.67   95.23
   0   8   6  805.78  116.47
   0  -8   6  762.16   67.50
   0   8   6  722.65   60.64
   0  -8  -6  514.83   51.99
   0  -8   6  820.67   71.82
   0   8   6  820.92   85.46
   0  -8  -6  687.00   64.60
   0  -8  -6  725.06   66.29
   0   8   6  605.15   54.33
   0  -8   6  678.21   54.83
   0  -8   6  772.53   60.81
   0  -8  -6  720.03   73.87
   0  -8   7   11.58   41.94
   0  -8  -7   24.54   48.51
   0   8   7  -10.23   49.03
   0  -8   7   28.18   37.85
   0  -8  -7   11.14   37.87
   0   8   7    8.14   39.71
   0  -8  -7    4.75   34.19
   0  -8  -7   -6.06   34.84
   0   8   7  -13.47   34.56
   0  -8   7   33.66   38.83
   0   8  -7  -18.19   35.42
   0  -8   7    4.97   38.20
   0  -8  -7  -39.82   30.48
   0   8  -8  926.90   92.59
   0  -8   8  942.84   94.73
   0  -8  -8  663.55   87.00
   0   8   8  800.89  104.41
   0  -8  -8  644.36   61.73
   0  -8  -8  705.90   56.15
   0  -8  -8  780.26   76.11
   0   8   8  846.63   81.76
   0  -8   8  875.70   82.11
   0   8  -8  968.52   90.17
   0  -8   8  629.01   49.23
   0  -8  -8  916.78   86.91
   0   8  -9  232.12   40.03
   0  -8   9  278.46   55.68
   0  -8  -9  199.90   57.96
   0   8   9  185.15   57.55
   0  -8  -9  233.32   46.69
   0   8  -9  237.23   46.19
   0  -8  -9  216.32   35.28
   0  -8  -9  253.11   46.44
   0   8   9  297.53   51.69
   0  -8   9  288.87   47.42
   0   8  -9  266.63   41.48
   0  -8  -9  191.45   45.67
   0   8   9  246.33   46.77
   0   8 -10  249.26   49.61
   0  -8  10  274.91   51.28
   0  -8 -10  218.51   56.64
   0   8  10  208.77   53.59
   0  -8 -10  156.79   43.16
   0   8 -10  268.67   45.82
   0  -8  10  312.33   52.63
   0  -8 -10  235.31   49.63
   0  -8 -10  227.27   44.16
   0   8  10  225.61   48.35
   0  -8  10  240.85   46.22
   0   8 -10  311.19   47.72
   0   8 -11  132.07   54.17
   0  -8  11  136.54   55.78
   0  -8 -11   86.76   57.42
   0   8  11  127.35   50.20
   0  -8 -11   89.07   40.74
   0   8 -11  199.23   89.61
   0  -8  11  101.03   46.07
   0  -8 -11   89.79   47.08
   0  -8 -11  138.08   45.36
   0   8  11  104.01   49.24
   0  -8  11   86.62   39.93
   0   8 -11  124.87   45.19
   0   8 -12  940.14  104.47
   0  -8  12 1095.28  111.40
   0  -8 -12  609.90  102.30
   0  -8 -12  675.80   99.89
   0   8 -12  856.26   85.22
   0  -8  12 1011.23  104.46
   0  -8 -12  706.30   90.83
   0  -8 -12  794.69   97.20
   0   8  12  712.36   80.43
   0  -8  12  909.05   92.57
   0   8 -12  852.34   87.94
   0   8 -13  114.28   52.39
   0  -8  13  180.05   60.06
   0  -8 -13   67.66   39.02
   0   8 -13   77.77   52.27
   0  -8  13   92.67   41.66
   0  -8 -13  165.48   45.62
   0   8  13  103.04   46.85
   0  -8  13  102.81   40.87
   0   8 -13  108.93   52.51
   0   8 -13   72.17   36.28
   0   8 -14  136.08   57.04
   0  -8  14  185.28   52.37
   0  -8 -14   68.97   41.34
   0   8 -14   92.40   42.48
   0  -8  14  109.13   41.26
   0   8  14  107.40   50.62
   0  -8  14   79.16   50.73
   0   8 -14  105.84   41.45
   0   8  14   58.56   30.80
   0   8 -14  108.19   38.25
   0  -8 -14  140.68   45.75
   0   8 -15  160.28   63.97
   0  -8  15  238.62   66.40
   0  -8 -15   89.90   45.69
   0   8 -15  175.36  132.63
   0   8 -15  141.36   41.40
   0   8  15   84.56   42.30
   0  -8  15  155.84   39.56
   0   8  15  202.58   42.35
   0   8 -15   78.35   28.04
   0  -8 -15  122.63   45.17
   0   8 -16 1093.80  137.81
   0  -8  16  937.46  120.39
   0  -8 -16  551.60   85.01
   0   8 -16  914.17  110.52
   0   8  16  736.59   93.84
   0  -8  16  902.09  112.99
   0   8  16  894.84  113.71
   0   8 -16  718.88   76.78
   0  -8 -16  679.01   90.43
   0   8 -17   22.94   55.92
   0  -8  17   14.94   57.40
   0  -8 -17   11.77   40.77
   0   8 -17   29.14   44.02
   0  -8 -17    5.81   41.42
   0   8  17  -30.01   39.75
   0  -8  17    2.74   45.61
   0   8  17   43.23   43.62
   0   8 -17   23.70   40.31
   0  -8 -17  -34.68   36.57
   0   8 -18  162.10   60.10
   0  -8 -18  167.24   62.19
   0  -8  18  201.17   62.50
   0  -8 -18  106.34   44.73
   0   8 -18  207.11   49.36
   0  -8 -18  127.19   48.70
   0   8  18   90.61   47.15
   0  -8  18  179.81   47.63
   0   8  18  144.33   45.59
   0   8 -18  164.52   51.47
   0  -8 -18  172.62   53.51
   0   8 -19  187.29   63.00
   0  -8 -19  112.05   70.19
   0  -8  19  160.66   59.29
   0  -8 -19   62.21   41.70
   0   8 -19  195.07   72.93
   0  -8 -19   82.86   47.83
   0   8  19   97.74   44.56
   0  -8  19  200.00   45.67
   0   8  19  180.89   45.41
   0   8 -19  166.77   41.80
   0  -8 -19  158.45   50.37
   0   8 -20  602.50   78.19
   0  -8 -20  421.43   87.39
   0   8 -20  555.46   68.47
   0  -8 -20  348.03   69.59
   0   8  20  271.83   67.75
   0  -8  20  484.57   67.75
   0   8  20  495.99   72.53
   0   8 -20  439.62   57.38
   0  -8 -20  437.88   74.72
   0   8 -21  218.24   61.58
   0  -8 -21  106.84   76.71
   0   8 -21  167.08   53.53
   0  -8 -21  102.25   51.99
   0   8  21   76.17   49.17
   0  -8  21  219.77   46.37
   0   8  21  227.82   54.77
   0   8 -21  119.48   46.26
   0  -8 -21  104.05   46.07
   0   8 -22  147.57   58.89
   0  -8 -22  165.59   61.59
   0   8 -22  193.37   57.63
   0  -8 -22   82.39   48.16
   0  -8  22  201.26   48.62
   0   8  22  158.08   50.69
   0   8 -22  151.02   48.92
   0  -8 -22  156.58   53.88
   0   8 -23   11.31   58.56
   0  -8 -23  -27.26   79.45
   0   8 -23  -15.23   50.75
   0  -8 -23   11.09   48.47
   0  -8  23   51.04   47.66
   0   8  23  -40.85   57.51
   0   8 -23  -10.43   41.63
   0  -8 -23   10.59   49.55
   0   8 -24  917.33  125.52
   0  -8 -24  849.53  156.21
   0   8 -24  991.98  132.27
   0  -8  24 1069.48  134.37
   0   8  24  636.32   88.94
   0   8 -24  991.84  125.10
   0  -8 -24  659.43  102.42
   0   8 -25   43.63   69.25
   0  -8 -25   58.52   67.17
   0   8 -25   65.20   58.53
   0  -8  25    9.82   60.81
   0   8  25   18.99   58.16
   0   8 -25   47.24   49.58
   0  -8 -25    1.52   62.24
   0  -8 -26   19.60   59.11
   0   8 -26   16.49   58.49
   0  -8  26   31.37   54.64
   0   8  26   43.43   53.20
   0   8 -26  101.36   51.13
   0  -8 -26  -13.61   61.05
   0  -8 -27   88.02   89.44
   0   8 -27  -19.07   53.68
   0  -8  27   30.81   54.30
   0   8  27   27.35   54.29
   0   8 -27   -0.45   53.85
   0  -8 -27   69.67   54.47
   0  -8 -28  105.93   76.32
   0   8 -28  121.91   66.45
   0  -8  28  113.79   61.01
   0   8  28   37.78   58.41
   0   8 -28   50.65   63.98
   0  -8 -28  -47.09   53.24
   0  -8 -29   40.13   75.44
   0   8 -29  153.28   66.96
   0  -8  29   75.27   69.75
   0   8  29   73.03   59.70
   0   8 -29   57.53   70.03
   0  -8 -29  121.56   67.18
   0  -9   0  -20.95   48.58
   0   9   0    9.38   45.30
   0   9   0   -8.25   35.26
   0  -9   0    3.38   43.53
   0   9   0  -33.69   34.89
   0  -9   0    3.09   29.05
   0   9   0    0.76   42.82
   0   9   1   44.23    2.56
   0  -9  -2 1574.29  197.74
   0  -9   2 1488.03  143.10
   0   9   2 1370.55  149.14
   0   9  -2 1577.48  129.83
   0   9   2 1444.88  122.47
   0   9  -2 1840.11  146.57
   0  -9  -2 1525.85  140.35
   0  -9   2 1728.77  137.58
   0   9   2 1503.85  135.41
   0   9  -2 1693.79  134.38
   0  -9  -2 1489.86  125.95
   0  -9  -2 1243.86  101.73
   0   9   2 1145.02   92.61
   0   9  -2 1644.50  132.73
   0  -9  -3  101.55   51.36
   0   9   3  157.85   58.34
   0  -9   3  159.77   48.24
   0   9  -3  104.49   39.32
   0   9   3  109.23   39.08
   0  -9  -3   60.99   36.87
   0   9  -3  158.80   40.43
   0  -9   3  130.02   46.02
   0   9   3  132.38   40.88
   0  -9  -3  217.55   53.57
   0   9  -3  104.50   30.44
   0  -9  -3  124.43   33.96
   0   9   3   86.61   42.52
   0  -9   4  893.39   85.43
   0  -9  -4  845.17  110.27
   0   9   4  743.68   90.51
   0  -9   4  800.21  111.57
   0   9   4  832.64   67.00
   0  -9  -4  627.03   64.32
   0   9  -4  974.77   62.13
   0  -9   4  996.38   92.25
   0   9   4  859.71   70.29
   0  -9  -4  816.05   68.93
   0   9  -4  736.71   53.90
   0  -9  -4  823.45   75.59
   0   9   4  809.65   66.54
   0  -9   4  936.44   69.09
   0  -9  -4  764.39   60.93
   0  -9   5 1984.60  160.45
   0  -9  -5 2049.88  223.59
   0   9   5 1648.06  179.06
   0  -9   5 2154.64  184.81
   0   9   5 1998.84  154.31
   0  -9  -5 1760.47  189.12
   0   9  -5 2410.76  186.64
   0  -9   5 2405.08  186.23
   0   9   5 1995.40  172.23
   0  -9  -5 1945.94  158.95
   0  -9  -5 1969.98  162.87
   0   9   5 1595.78  124.36
   0  -9   5 2242.11  172.34
   0  -9  -5 1947.85  164.34
   0  -9   6   59.34   56.55
   0  -9  -6   18.63   53.75
   0   9   6   64.31   63.18
   0  -9   6   31.17   34.24
   0   9   6   45.79   42.14
   0  -9  -6   36.77   37.79
   0  -9   6   44.55   51.32
   0   9   6   17.97   40.80
   0  -9  -6    6.97   43.11
   0  -9  -6   56.84   40.51
   0   9   6    9.00   34.46
   0  -9   6   19.11   29.10
   0  -9   6    3.61   29.54
   0  -9  -6   36.60   34.15
   0  -9  -7   49.91    2.95
   0  -9   8 1118.26  105.34
   0  -9  -8  765.84  111.77
   0   9   8  862.78  104.20
   0  -9   8 1236.71  107.99
   0  -9  -8  836.06  104.93
   0   9   8  995.45  121.06
   0  -9  -8  892.25   89.51
   0  -9  -8 1117.77  100.19
   0   9   8 1041.25   93.61
   0  -9   8 1251.79  106.51
   0   9  -8 1279.00  108.39
   0  -9   8 1329.62  111.91
   0  -9  -8 1041.56  123.70
   0  -9   9 1426.68  144.95
   0  -9  -9 1316.12  168.72
   0   9   9 1322.06  159.38
   0  -9  -9  881.87  107.62
   0  -9  -9 1054.29  120.36
   0  -9  -9 1223.69  121.22
   0   9   9 1241.98  128.16
   0  -9   9 1420.25  135.93
   0   9  -9 1176.73  114.02
   0  -9   9 1270.12  121.38
   0  -9  -9 1221.84  129.04
   0   9 -10 1876.48  178.44
   0  -9  10 2315.55  216.95
   0  -9 -10 1380.66  110.30
   0   9  10 1936.74  211.24
   0  -9 -10 1324.21  153.11
   0   9 -10 2201.23  205.44
   0  -9 -10 1624.79  171.28
   0  -9 -10 1904.53  195.10
   0   9  10 1886.60  178.13
   0  -9  10 2321.27  211.64
   0   9 -10 2476.43  227.11
   0  -9 -10 1965.53  193.13
   0   9  10 1912.78  176.69
   0   9 -11 1009.57  101.88
   0  -9  11 1280.89  147.56
   0  -9 -11  806.73  121.40
   0   9  11  898.12  116.51
   0  -9 -11  680.05   88.73
   0   9 -11 1023.13   97.42
   0  -9  11 1012.64   99.81
   0  -9 -11  820.26   98.73
   0  -9 -11  729.89   77.40
   0   9  11  870.68   94.71
   0  -9  11 1116.00  106.96
   0   9 -11 1142.12  109.16
   0   9  11  740.56   87.17
   0   9 -12  170.65   53.73
   0  -9  12  150.62   54.45
   0  -9 -12  143.44   56.49
   0   9  12   63.60   51.80
   0  -9 -12  106.95   44.37
   0  -9  12  162.51   49.28
   0  -9 -12  101.63   46.70
   0  -9 -12  149.06   42.16
   0   9  12  124.47   43.03
   0  -9  12  122.72   35.26
   0   9 -12  155.80   45.32
   0   9 -13 1191.25  143.95
   0  -9  13 1206.87  142.55
   0  -9 -13  857.98  115.59
   0  -9 -13  864.16   98.49
   0   9 -13 1239.56  142.18
   0  -9  13 1248.46  142.95
   0  -9 -13  756.81   78.33
   0  -9 -13  859.64   92.35
   0   9  13  990.59  128.96
   0  -9  13 1183.25  137.55
   0   9 -13 1233.64  142.80
   0   9 -14  -31.36   57.86
   0  -9  14    2.19   48.44
   0  -9 -14    4.57   53.61
   0  -9 -14   -3.99   43.63
   0   9 -14   -0.95   40.89
   0  -9 -14    4.30   39.54
   0   9  14   -9.52   47.04
   0  -9  14   -1.63   37.77
   0   9 -15   12.94   50.73
   0  -9  15   27.54   66.12
   0  -9 -15   15.24   50.10
   0   9 -15  -35.67   44.59
   0   9  15   12.74   42.02
   0  -9  15    1.30   43.56
   0   9  15   12.68   31.19
   0   9 -15   -1.90   41.93
   0  -9 -15   18.41   42.15
   0   9 -16  212.52   62.31
   0  -9  16  243.73   60.37
   0  -9 -16  125.15   45.63
   0   9 -16  222.06  120.51
   0  -9  16  205.99   75.57
   0   9  16  216.06   50.38
   0   9 -16  199.18   38.22
   0  -9 -16  156.61   55.47
   0   9 -17  806.50   97.83
   0  -9  17  981.05  116.57
   0  -9 -17  421.91   67.20
   0   9 -17  811.78   89.19
   0  -9  17  784.94   90.46
   0   9  17  643.24   84.95
   0   9 -17  863.51   91.55
   0  -9 -17  622.58   80.83
   0   9 -18  215.73  100.12
   0  -9  18  176.69   63.32
   0  -9 -18   98.18   49.11
   0   9 -18  239.51   58.45
   0  -9 -18  139.38   50.48
   0  -9  18  303.81  143.67
   0   9  18  186.80   51.63
   0   9 -18  226.87   57.16
   0  -9 -18  162.92   58.84
   0   9 -19 1430.43  159.98
   0   9 -19 1380.11  148.70
   0  -9 -19  770.64  103.25
   0   9  19  786.87  107.42
   0  -9  19 1503.36  162.30
   0   9  19 1079.77  127.32
   0   9 -19 1154.41  124.99
   0  -9 -19  971.37  129.43
   0   9 -20   32.96   62.72
   0  -9 -20   50.62   58.83
   0   9 -20  -42.97   47.86
   0  -9 -20    7.60   45.34
   0   9  20   -7.11   51.69
   0  -9  20   45.17   69.04
   0   9  20   35.01   41.78
   0   9 -20   54.28   46.17
   0  -9 -20   22.08   51.16
   0   9 -21  406.76   78.54
   0  -9 -21  287.60   77.71
   0   9 -21  325.63   61.62
   0  -9 -21  213.43   62.17
   0  -9  21  334.80   60.91
   0   9  21  275.66   55.02
   0   9 -21  378.31   59.85
   0  -9 -21  255.16   58.65
   0   9 -22  566.36   93.94
   0  -9 -22  314.16   67.61
   0   9 -22  576.86   82.55
   0  -9 -22  282.47   59.66
   0  -9  22  533.83   82.72
   0   9  22  334.97   51.96
   0   9 -22  433.24   59.09
   0  -9 -22  404.57   64.16
   0   9 -23  328.78   74.50
   0  -9 -23  226.71   69.72
   0   9 -23  337.51   56.52
   0  -9  23  366.90   67.39
   0   9  23  247.49   58.98
   0   9 -23  238.67   38.86
   0  -9 -23  151.79   51.47
   0  -9 -24  383.08   88.76
   0   9 -24  456.82   58.92
   0  -9  24  634.64  109.38
   0   9  24  380.00   87.43
   0   9 -24  333.09   41.81
   0  -9 -24  390.60   66.15
   0  -9 -25  273.90   79.66
   0   9 -25  321.41   54.46
   0  -9  25  429.32   65.06
   0   9  25  231.52   42.90
   0   9 -25  297.24   66.88
   0  -9 -25  228.35   55.43
   0  -9 -26   29.16   89.70
   0   9 -26  166.22   64.31
   0  -9  26  191.01   62.62
   0   9  26  148.91   64.32
   0   9 -26  213.70   60.43
   0  -9 -26   80.54   55.28
   0  -9 -27  270.65   76.32
   0   9 -27  494.66   90.06
   0  -9  27  406.67   75.64
   0   9  27  275.50   62.19
   0   9 -27  311.63   68.79
   0  -9 -27  255.77   71.65
   0  -9 -28   78.17   96.00
   0   9 -28  149.90   70.26
   0  -9  28  267.71   69.69
   0   9  28   97.20   53.42
   0   9 -28   96.02   62.63
   0  -9 -28  164.64   51.56
   0  -9 -29  148.91   94.82
   0  -9  29  129.15   67.90
   0   9  29  148.60   70.24
   0   9 -29  163.93   59.44
   0  -9 -29   37.90   56.71
   0 -10   0  154.04   53.41
   0  10   0  119.54   48.05
   0  10   0  122.74   36.58
   0 -10   0  112.40   50.29
   0  10   0  125.62   39.25
   0 -10   0   83.25   40.77
   0  10   0   91.87   48.42
   0 -10  -1 4038.53  431.43
   0 -10   1 3565.03  380.94
   0  10   1 4186.46  408.72
   0  10  -1 4185.93  392.32
   0  10   1 3126.28  292.23
   0  10  -1 4272.90  395.63
   0 -10  -1 3786.26  356.77
   0 -10   1 5176.43  486.77
   0  10   1 4381.59  421.05
   0  10  -1 4420.68  414.99
   0 -10  -1 3610.44  342.12
   0 -10  -1 3735.41  347.28
   0  10   1 4115.05  381.81
   0  10  -1 4139.46  382.48
   0 -10  -2  149.08   58.17
   0 -10   2  104.98   46.39
   0  10   2  146.41   59.79
   0  10  -2  138.66   46.93
   0  10   2   89.44   39.04
   0  10  -2  123.82   37.32
   0 -10  -2  119.98   39.89
   0 -10   2  168.98   47.98
   0  10   2  146.68   41.70
   0  10  -2  159.35   50.11
   0 -10  -2  140.00   40.05
   0 -10  -2  121.71   36.28
   0  10   2  141.85   37.67
   0  10  -2  147.51   43.89
   0 -10  -3 1654.71  184.15
   0 -10   3 1301.44  139.71
   0  10   3 1737.43  171.27
   0  10  -3 1644.44  130.97
   0  10   3 1719.94  147.78
   0  10  -3 1881.11  185.64
   0 -10  -3 1203.22  132.06
   0 -10   3 1686.29  133.82
   0  10   3 1637.34  156.21
   0 -10  -3 1635.17  137.15
   0  10  -3 1605.03  125.71
   0 -10  -3 1659.70  140.38
   0  10   3 1641.06  130.34
   0  10  -3 1567.89  127.38
   0 -10   4 1343.42  119.48
   0 -10  -4 1486.20  189.87
   0  10   4 1357.91  142.38
   0 -10   4 1256.17  138.43
   0  10   4 1506.24  157.90
   0 -10  -4 1372.89  148.37
   0  10  -4 1302.92  103.49
   0 -10   4 1825.23   80.03
   0  10   4 1517.31  145.18
   0 -10  -4 1429.64  131.42
   0  10  -4 1504.40  118.83
   0 -10  -4 1520.41  123.14
   0  10   4 1427.69  116.73
   0 -10  -4 1516.89  125.42
   0 -10   5  218.40   54.20
   0 -10  -5  218.93   71.30
   0  10   5  124.61   49.57
   0 -10   5  198.52   47.53
   0  10   5  183.26   36.88
   0 -10  -5  190.19   52.70
   0  10  -5  240.21   43.18
   0 -10   5  202.15   50.96
   0  10   5  201.63   47.19
   0 -10  -5  214.86   43.32
   0 -10  -5  162.89   46.66
   0  10   5  239.94   42.68
   0 -10   5  215.73   52.14
   0 -10  -5  219.93   41.45
   0 -10   6  208.06   47.06
   0 -10  -6  150.60   58.38
   0  10   6  219.65   64.41
   0 -10   6  246.41   45.34
   0  10   6  206.68   40.31
   0 -10  -6  150.52   47.52
   0  10  -6  277.91   43.04
   0 -10   6  271.50   58.48
   0  10   6  216.17   48.58
   0 -10  -6  198.84   40.70
   0 -10  -6  198.72   44.58
   0  10   6  142.96   33.97
   0 -10   6  235.53   45.48
   0 -10  -6  286.72   45.71
   0 -10   7 1413.03   70.55
   0 -10  -7 1550.74  197.18
   0  10   7 1557.79  179.89
   0 -10   7 1767.09  170.46
   0  10   7 1666.27  158.74
   0 -10  -7 1269.95  166.35
   0 -10   7 2032.21  192.12
   0  10   7 1845.85  185.59
   0 -10  -7 1427.17  145.82
   0 -10  -7 1573.64  158.41
   0  10   7 1513.77  147.49
   0 -10   7 1472.91  139.95
   0 -10   7 1823.96  171.30
   0 -10  -7 1435.52  146.07
   0 -10   8  906.37   99.22
   0 -10  -8  683.26  105.55
   0  10   8  931.01  126.40
   0 -10   8  958.48  101.24
   0 -10  -8  589.71   90.38
   0 -10   8  989.13   99.93
   0  10   8  812.75  106.00
   0 -10  -8  812.89   89.47
   0 -10  -8  883.11  102.19
   0  10   8  831.76   89.44
   0 -10   8  889.59   87.11
   0  10  -8 1022.62  102.15
   0 -10   8  959.92   99.23
   0 -10  -8  854.89   96.92
   0 -10   9 5544.29  537.77
   0 -10  -9 4338.06  457.50
   0  10   9 3668.76  381.44
   0 -10   9 4947.80  477.44
   0 -10  -9 3074.73  331.04
   0 -10  -9 4211.39  422.55
   0 -10  -9 4247.47  420.19
   0  10   9 4505.16  436.28
   0 -10   9 5600.63  539.50
   0  10  -9 5798.19  555.27
   0 -10   9 4535.69  434.53
   0 -10  -9 4739.67  486.16
   0 -10  10  321.02   50.50
   0 -10 -10  225.59   49.82
   0  10  10  306.37   63.75
   0 -10  10  333.38   45.32
   0 -10 -10  184.57   44.73
   0 -10 -10  294.27   50.50
   0 -10 -10  299.73   47.00
   0  10  10  262.61   44.74
   0 -10  10  384.68   47.16
   0  10 -10  379.41   51.16
   0 -10  10  325.34   49.12
   0 -10 -10  296.09   44.30
   0  10 -11  923.85   71.82
   0 -10  11 1212.77  149.17
   0 -10 -11  796.86  122.50
   0  10  11  823.33  118.59
   0 -10 -11  644.22   90.69
   0  10 -11 1063.61  151.70
   0 -10 -11  691.94   79.91
   0 -10 -11  874.63   89.81
   0  10  11  843.71   85.68
   0 -10  11 1084.23  126.40
   0  10 -11 1100.68  126.66
   0  10 -12  339.11   60.29
   0 -10  12  355.10   61.65
   0 -10 -12  343.87   73.88
   0  10  12  309.86   63.30
   0 -10 -12  167.13   50.67
   0  10 -12  394.53  112.76
   0 -10 -12  377.77   55.16
   0 -10 -12  236.66   47.92
   0  10  12  292.20   58.42
   0 -10  12  439.36   54.84
   0  10 -12  361.79   57.01
   0  10 -13  366.09   49.99
   0 -10  13  555.83   83.52
   0 -10 -13  411.87   87.03
   0 -10 -13  239.65   63.38
   0  10 -13  591.39   79.44
   0 -10 -13  367.15   56.17
   0  10  13  354.02   53.05
   0 -10  13  539.90   75.84
   0  10 -14   19.35   54.55
   0 -10  14   70.25   48.30
   0 -10 -14   28.95   52.49
   0 -10 -14   31.62   46.92
   0 -10 -14   24.93   43.58
   0  10  14   11.17   48.32
   0  10 -15  897.46  106.45
   0 -10  15 1138.55  122.36
   0 -10 -15  629.96  107.57
   0 -10 -15  517.40   98.27
   0  10 -15 1025.30  113.22
   0 -10 -15  623.75   91.26
   0 -10  15  997.90  146.87
   0  10 -16  660.72   87.74
   0 -10  16  873.95  113.20
   0 -10 -16  585.78  102.80
   0 -10 -16  369.20   69.49
   0  10 -16  743.68   88.03
   0 -10  16  740.36   86.64
   0  10  16  422.73   46.33
   0  10 -16  539.49   67.30
   0 -10 -16  487.62   73.79
   0  10 -17   -2.74   55.79
   0 -10  17   53.15   49.90
   0 -10 -17   27.62   44.85
   0  10 -17  118.88   47.13
   0 -10  17   10.23   54.57
   0  10  17   18.39   39.78
   0  10 -17  -33.06   46.75
   0 -10 -17   -2.65   57.01
   0  10 -18   -3.68   69.65
   0 -10 -18   -7.59   42.09
   0  10 -18  -29.25   49.84
   0 -10  18   -2.69   45.54
   0  10  18   22.66   44.66
   0  10 -18   -2.37   46.21
   0 -10 -18    8.54   41.17
   0  10 -19   30.64   63.65
   0  10 -19  151.60   60.79
   0 -10 -19   52.16   49.70
   0  10  19   12.78   44.03
   0 -10  19   96.24   59.22
   0  10  19   87.61   46.11
   0  10 -19   79.12   55.75
   0 -10 -19   37.88   46.56
   0  10 -20  148.96   59.35
   0  10 -20  331.58   57.66
   0 -10 -20  103.08   44.75
   0  10  20  156.00   48.22
   0 -10  20  185.37  113.60
   0  10  20  199.78   47.41
   0  10 -20  188.23  123.70
   0 -10 -20  197.36   51.67
   0  10 -21 1140.85  164.94
   0 -10 -21  655.73  115.33
   0  10 -21 1275.83  173.73
   0 -10 -21  653.61   97.49
   0 -10  21 1250.82  170.60
   0  10  21  831.39  125.70
   0  10 -21 1151.84  157.22
   0 -10 -21  811.23  130.01
   0  10 -22   57.53   63.58
   0 -10 -22   79.76   61.94
   0  10 -22   74.72   56.91
   0 -10  22  135.71   48.47
   0  10  22   75.34   59.01
   0  10 -22  108.06   47.00
   0 -10 -22   59.57   50.20
   0 -10 -23  692.80  119.03
   0  10 -23  999.27  125.06
   0 -10  23  707.24  102.10
   0  10  23  589.68  114.14
   0  10 -23  937.38  115.68
   0 -10 -23  564.04   67.71
   0 -10 -24  368.50   93.26
   0  10 -24  467.57   74.18
   0 -10  24  483.61   62.62
   0  10  24  300.80   57.61
   0  10 -24  391.65   56.07
   0 -10 -24  249.32   64.33
   0 -10 -25  230.33   94.14
   0  10 -25  278.77   61.19
   0 -10  25  213.50   60.36
   0  10  25  169.01   62.80
   0  10 -25  245.21   54.26
   0 -10 -25  137.90   64.38
   0 -10 -26   29.41   69.57
   0  10 -26    4.92   49.35
   0 -10  26   32.68   46.38
   0  10  26  -42.58   47.04
   0  10 -26   30.40   55.59
   0 -10 -26    0.69   59.77
   0 -10 -27  103.89   77.95
   0  10 -27  289.63   63.18
   0 -10  27  322.99   62.58
   0  10  27  155.30   65.21
   0  10 -27  231.28   56.66
   0 -10 -27  166.85   58.67
   0 -10 -28  182.46   87.05
   0  10 -28    2.13   71.89
   0 -10  28   11.53   64.24
   0  10  28  -19.57   59.77
   0  10 -28   34.50   69.33
   0 -10 -28  -23.35   68.28
   0 -11   0    1.93   47.35
   0  11   0   -8.20   46.53
   0  11   0    7.49   31.59
   0 -11   0  -11.98   45.88
   0  11   0    2.75   30.23
   0 -11   0    8.46   25.10
   0  11   0   23.34   34.62
   0 -11  -1  854.65  120.98
   0 -11   1  711.91  103.14
   0  11   1  887.90  111.31
   0  11  -1  833.56   81.35
   0  11   1  717.53   64.04
   0  11  -1  833.72   81.81
   0 -11  -1  540.94   51.99
   0 -11   1  909.85   97.03
   0  11   1  877.49   93.89
   0  11  -1  911.88   84.72
   0 -11  -1  720.99   66.82
   0 -11  -1  767.49   84.61
   0 -11   1  796.31   76.38
   0  11   1  733.79   50.00
   0  11  -1  829.31   83.76
   0 -11  -2 3144.58  339.60
   0 -11   2 2737.34  307.21
   0  11   2 3064.19  314.43
   0  11  -2 3396.74  318.22
   0  11   2 3238.25  313.60
   0  11  -2 2668.51  249.58
   0 -11  -2 2764.83  267.31
   0 -11   2 3411.85  324.22
   0  11   2 2939.05  279.32
   0  11  -2 3050.72  286.99
   0 -11  -2 3353.03  327.43
   0 -11  -2 3157.40  302.94
   0  11   2 3185.83  301.77
   0  11  -2 3661.50  340.88
   0 -11  -3   67.27   47.13
   0 -11   3   62.44   49.19
   0  11   3   55.48   48.26
   0  11  -3  110.09   35.32
   0  11   3   90.48   38.11
   0  11  -3   82.83   44.94
   0 -11  -3   73.95   38.19
   0 -11   3   87.33   50.87
   0  11   3   90.92   42.51
   0  11  -3  144.73   41.30
   0 -11  -3   76.82   36.61
   0 -11  -3   98.04   36.98
   0  11   3   84.79   33.52
   0  11  -3   85.26   43.73
   0 -11   4  258.23   67.54
   0 -11  -4  201.67   53.11
   0 -11   4  199.81   51.42
   0  11   4  192.59   51.69
   0  11   4  240.48   44.18
   0  11  -4  260.22   34.88
   0 -11  -4  155.03   43.02
   0 -11   4  307.75   49.99
   0  11   4  253.95   52.04
   0 -11  -4  271.96   49.98
   0  11  -4  255.96   42.32
   0 -11  -4  232.18   43.80
   0  11   4  196.43   38.85
   0 -11  -4  265.06   40.15
   0 -11   5   31.65   46.25
   0 -11  -5   37.67   56.76
   0  11   5    2.63   42.97
   0 -11   5   31.77   40.46
   0  11   5  -18.47   40.68
   0 -11  -5  -14.52   48.03
   0  11  -5  -16.13   27.00
   0 -11   5   30.67   47.98
   0  11   5  -21.07   39.40
   0 -11  -5  -14.57   35.42
   0  11  -5  -22.65   33.13
   0 -11  -5   10.85   39.47
   0  11   5   22.65   43.74
   0 -11   5  -10.90   47.22
   0 -11  -5  -28.32   39.32
   0 -11   6 3831.45  349.44
   0 -11  -6 3170.63  346.91
   0  11   6 3092.02  306.82
   0 -11   6 3124.46  304.83
   0  11   6 3848.61  343.78
   0 -11  -6 3085.85  317.69
   0  11  -6 4208.35  369.42
   0 -11   6 3120.06  274.45
   0  11   6 3937.02  362.50
   0 -11  -6 3287.06  304.89
   0 -11  -6 3309.23  306.81
   0  11   6 3049.07  279.25
   0 -11   6 4170.19  365.31
   0 -11  -6 3443.35  318.55
   0 -11   7 1467.67  151.81
   0 -11  -7 1153.20  164.10
   0  11   7 1152.60  154.04
   0 -11   7 1292.03  153.16
   0  11   7 1419.21  139.74
   0 -11  -7  912.82  146.85
   0  11  -7 1400.49   64.86
   0 -11   7 1720.91  167.17
   0  11   7 1367.85  154.82
   0 -11  -7 1220.52  129.43
   0 -11  -7 1167.70  123.98
   0  11   7 1049.39  102.51
   0 -11   7 1214.87  118.14
   0 -11   7 1376.82   65.96
   0 -11  -7 1189.96  133.63
   0 -11   8    1.27   59.58
   0 -11  -8   20.95   42.65
   0  11   8  -32.74   59.36
   0 -11   8   -1.20   35.07
   0  11   8  -10.59   39.12
   0 -11  -8    8.61   35.74
   0 -11   8   20.91   47.22
   0  11   8   -8.91   42.26
   0 -11  -8   -3.25   38.07
   0 -11  -8    2.74   43.13
   0  11   8  -23.77   44.80
   0 -11   8   22.37   32.38
   0  11  -8   -7.00   44.92
   0 -11   8   -9.85   42.17
   0 -11  -8   12.27   34.08
   0 -11   9   17.41   58.07
   0 -11  -9   34.41   50.33
   0  11   9    7.92   42.91
   0 -11   9   17.42   38.56
   0 -11  -9   11.41   31.53
   0 -11   9   80.69   46.35
   0 -11  -9   16.88   37.21
   0 -11  -9  -28.24   41.38
   0  11   9   33.42   37.59
   0 -11   9   21.15   35.97
   0  11  -9   34.49   46.68
   0 -11   9   22.89   44.82
   0 -11  -9   -5.33   42.15
   0 -11 -10   60.16    3.59
   0 -11  11  378.86   64.37
   0 -11 -11  350.41   67.76
   0  11  11  214.23   56.79
   0 -11  11  408.83   49.78
   0 -11 -11  259.73   57.26
   0 -11 -11  314.25   53.63
   0 -11 -11  287.32   58.50
   0  11  11  287.80   51.36
   0 -11  11  361.33   50.60
   0 -11 -11  389.29   47.70
   0 -11  12  513.49   63.65
   0 -11 -12  415.18   80.11
   0 -11  12  470.71   66.08
   0 -11 -12  247.00   61.48
   0  11 -12  525.96   68.75
   0 -11 -12  280.58   63.14
   0  11  12  354.18   52.02
   0 -11  12  520.90   54.46
   0  11 -13  761.44   95.59
   0 -11  13 1074.37  143.03
   0 -11 -13  669.25  121.02
   0 -11 -13  484.47   92.56
   0  11 -13  933.20  114.17
   0 -11 -13  694.68   93.01
   0  11  13  649.81   97.67
   0 -11  13  844.10   60.55
   0  11 -14  269.01   53.91
   0 -11  14  328.33   53.46
   0 -11 -14  269.10   64.67
   0 -11 -14   82.45   40.58
   0  11 -14  287.09   55.77
   0 -11 -14  265.09   55.87
   0 -11  14  294.74   50.79
   0  11 -15    5.77   55.83
   0 -11  15   38.27   56.87
   0 -11 -15   21.74   60.25
   0 -11 -15  -20.27   46.06
   0  11 -15   46.40   52.17
   0 -11 -15   -7.50   44.08
   0 -11  15   11.36   36.75
   0  11 -16   48.18   60.09
   0 -11  16   87.54   64.95
   0 -11 -16   20.75   53.79
   0 -11 -16   37.19   45.43
   0  11 -16   55.43   48.08
   0 -11  16   49.72   46.35
   0  11 -17  -15.80   60.61
   0 -11 -17  -61.93   71.47
   0 -11 -17   -5.49   45.42
   0  11 -17  -14.88   81.84
   0  11  17  -10.85   42.45
   0 -11 -17   -9.88   45.32
   0  11 -18 1146.87  137.91
   0 -11 -18  747.09  107.21
   0  11 -18 1145.44  128.80
   0 -11  18 1097.27  139.11
   0  11  18 1008.38  124.10
   0  11 -18 1109.43  133.33
   0 -11 -18  835.54  116.76
   0  11 -19  376.54   70.79
   0  11 -19  474.41   69.79
   0 -11  19  380.91   57.92
   0  11  19  320.71   62.00
   0  11 -19  319.76   40.76
   0 -11 -19  202.97   49.17
   0  11 -20   65.39   59.75
   0  11 -20   40.74   57.49
   0 -11 -20   70.71   52.75
   0 -11  20  105.25   59.39
   0  11  20   96.36   55.12
   0  11 -20   43.07   39.14
   0 -11 -20   44.27   41.79
   0  11 -21  196.42   50.97
   0 -11  21  153.39   65.94
   0  11  21   66.16   53.36
   0  11 -21  205.42   44.94
   0 -11 -21  130.39   56.21
   0  11 -22  493.36   63.05
   0 -11  22  441.41   63.38
   0  11  22  286.76   53.89
   0  11 -22  434.79   51.62
   0 -11 -22  293.62   62.23
   0 -11 -23   71.96   65.23
   0  11 -23  -10.17   54.53
   0 -11  23  -40.46   61.61
   0  11  23   13.28   54.59
   0  11 -23   15.25   43.40
   0 -11 -23   -5.53   55.96
   0 -11 -24  120.54   70.87
   0  11 -24    3.09   62.35
   0 -11  24   52.84   57.41
   0  11  24   89.73   53.48
   0  11 -24   42.36   47.90
   0 -11 -24   44.27   57.85
   0 -11 -25  -57.40   74.95
   0  11 -25   49.64   59.89
   0 -11  25   60.04   54.12
   0  11  25   84.87   53.87
   0  11 -25  -22.32   54.50
   0 -11 -25   55.32   59.99
   0 -11 -26  374.45   81.76
   0  11 -26  543.38   94.87
   0 -11  26  409.93   74.20
   0  11  26  245.53   61.47
   0  11 -26  444.55   77.04
   0 -11 -26  269.45   69.06
   0 -11 -27   37.02   83.45
   0  11 -27   72.54   62.17
   0 -11  27   94.11   70.68
   0  11  27    0.96   46.87
   0  11 -27   31.56   49.39
   0 -11 -27   14.60   62.22
   0 -12   0 7491.99  713.17
   0  12   0 9416.48  199.11
   0  12   0 8657.11  753.99
   0 -12   0 8683.05  758.72
   0  12   0 9862.53  246.84
   0 -12   0 9788.29  179.50
   0  12   0 9694.14  178.35
   0 -12  -1  131.50   53.63
   0 -12   1  103.41   57.60
   0  12   1  152.85   51.72
   0  12  -1  159.80   42.57
   0  12   1  134.34   34.18
   0  12  -1  137.97   38.41
   0 -12  -1  131.27   44.92
   0 -12   1  134.52   41.17
   0  12   1  148.47   36.98
   0  12  -1  165.76   44.04
   0 -12  -1  109.82   32.68
   0 -12  -1  163.97   42.78
   0 -12   1  164.17   35.79
   0  12   1  164.12   49.85
   0  12  -1  130.51   42.54
   0 -12  -2  137.45   56.92
   0 -12   2  109.15   58.29
   0  12   2  110.23   51.12
   0  12  -2  127.14   45.34
   0  12   2  120.78   38.72
   0  12  -2   98.39   43.64
   0 -12  -2  119.76   37.25
   0 -12   2  173.15   45.80
   0  12   2  146.03   42.22
   0  12  -2  105.86   39.61
   0 -12  -2  164.48   47.33
   0 -12  -2  143.29   42.41
   0  12   2  132.74   48.46
   0  12  -2  165.17   50.17
   0 -12  -3   80.22   49.84
   0 -12   3   45.22   35.69
   0  12   3   12.35   48.88
   0  12  -3   16.64   45.33
   0  12   3   -4.21   41.71
   0  12  -3   11.59   40.11
   0 -12  -3   34.53   49.90
   0 -12   3   79.36   44.17
   0  12   3   53.78   39.46
   0  12  -3   28.23   35.02
   0 -12  -3   28.35   40.94
   0 -12  -3   44.28   40.26
   0  12   3    3.55   35.02
   0  12  -3   45.78   42.17
   0 -12   4  274.39   61.33
   0 -12  -4  237.49   59.07
   0 -12   4  232.64   65.47
   0  12   4  227.74   49.22
   0  12   4  257.04   46.23
   0  12  -4  368.70   49.27
   0 -12  -4  224.45   52.63
   0 -12   4  226.76   57.41
   0  12   4  285.66   47.55
   0 -12  -4  241.89   53.74
   0  12  -4  321.02   48.55
   0 -12  -4  236.28   43.63
   0  12   4  154.41   31.45
   0  12  -4  203.71   41.53
   0 -12  -4  205.51   44.48
   0 -12   5  508.60   61.99
   0 -12  -5  512.69   66.05
   0 -12   5  495.37   67.45
   0  12   5  519.02   55.12
   0  12   5  592.55   71.90
   0  12  -5  473.86   42.28
   0 -12  -5  374.63   57.34
   0 -12   5  625.06   77.03
   0  12   5  540.15   78.43
   0 -12  -5  604.93   85.80
   0  12  -5  490.26   48.46
   0 -12  -5  487.35   64.39
   0  12   5  504.71   47.29
   0 -12   5  512.37   49.65
   0 -12  -5  592.13   75.89
   0 -12   6    5.80   47.65
   0 -12  -6   28.62   55.62
   0  12   6   32.39   54.60
   0 -12   6   14.46   39.23
   0  12   6   30.62   39.44
   0 -12  -6   -2.14   39.38
   0  12  -6   18.46   31.38
   0 -12   6   20.05   36.43
   0  12   6   54.68   37.44
   0 -12  -6   14.08   37.78
   0  12  -6   40.63   31.46
   0 -12  -6   63.17   39.14
   0  12   6   15.67   36.39
   0 -12   6   42.69   44.31
   0 -12  -6   43.35   35.55
   0 -12   7   52.67   60.83
   0 -12  -7   87.24   51.20
   0  12   7   53.48   60.14
   0 -12   7   46.49   41.95
   0  12   7   10.70   35.51
   0 -12  -7   40.42   39.23
   0  12  -7   43.25   45.64
   0 -12   7   81.43   50.57
   0  12   7   46.18   41.82
   0 -12  -7   77.75   43.67
   0 -12  -7  113.22   41.47
   0  12   7   51.06   37.12
   0 -12   7   70.12   44.32
   0 -12  -7   27.72   41.14
   0 -12   8  525.46   67.04
   0 -12  -8  340.55   71.92
   0  12   8  417.62   88.18
   0 -12   8  445.71   61.77
   0  12   8  502.01   62.39
   0 -12  -8  297.03   60.57
   0  12  -8  526.15   56.34
   0 -12   8  632.59   79.31
   0  12   8  486.03   72.94
   0 -12  -8  443.75   58.63
   0 -12  -8  413.59   53.01
   0  12   8  428.77   61.88
   0 -12   8  523.44   62.15
   0 -12   8  579.12   61.29
   0 -12  -8  454.16   62.70
   0 -12   9   21.65   47.89
   0 -12  -9   -7.15   53.35
   0  12   9   18.37   54.25
   0 -12   9   -2.83   46.49
   0 -12  -9   -5.85   40.81
   0  12   9  -23.71   42.22
   0 -12  -9   10.63   45.18
   0 -12  -9   17.95   44.32
   0  12   9    6.44   33.72
   0 -12   9   16.86   36.12
   0 -12  -9  -46.92   43.19
   0 -12  10 2547.89  292.36
   0 -12 -10 1321.77  182.44
   0  12  10 1911.08  243.22
   0 -12  10 2069.61  247.66
   0 -12 -10 1593.17  221.96
   0 -12 -10 1809.45  225.15
   0  12  10 1844.68  224.06
   0 -12  10 2472.82  273.42
   0 -12 -10 2020.65  247.91
   0 -12  11   17.76   52.75
   0 -12 -11   -5.95   64.29
   0 -12  11   20.85   42.62
   0 -12 -11  -11.61   32.00
   0 -12 -11   10.60   40.23
   0  12  11   34.52   41.27
   0 -12  11   26.49   33.38
   0 -12 -11   24.89   44.26
   0 -12  12  475.03   79.86
   0 -12 -12  425.25   90.34
   0 -12  12  447.72   63.78
   0 -12 -12  190.70   43.57
   0 -12 -12  292.67   58.97
   0 -12  12  365.90   49.55
   0 -12  13   25.10   70.05
   0 -12 -13   30.66   65.82
   0 -12  13   31.75   47.19
   0 -12 -13   12.89   38.92
   0  12 -13   36.13   28.11
   0 -12 -13   -4.24   38.39
   0 -12  13   21.09   43.75
   0 -12  14  406.52   66.13
   0 -12 -14  347.24   82.18
   0 -12  14  303.52   51.68
   0 -12 -14  183.52   51.96
   0  12 -14  408.73   55.09
   0 -12 -14  265.41   59.69
   0 -12  14  402.62   55.10
   0 -12  15  106.95   55.93
   0 -12 -15   18.70   58.36
   0 -12 -15   35.20   50.06
   0  12 -15   68.24   44.10
   0 -12 -15   15.60   53.96
   0 -12  15   52.74   52.44
   0  12 -16   25.80   58.04
   0 -12 -16   72.94   56.58
   0 -12 -16   62.78   43.03
   0  12 -16  135.47   43.07
   0 -12 -16   78.90   53.09
   0 -12  16   88.78   49.26
   0  12 -17   99.22   55.21
   0 -12 -17  117.46   58.97
   0  12 -17  127.80   45.71
   0 -12  17  137.59   47.83
   0  12  17  144.68   44.25
   0  12 -18   95.10   68.30
   0 -12 -18  -28.97   72.20
   0  12 -18   84.93   51.54
   0 -12  18   29.70   48.21
   0  12  18   35.59   42.41
   0 -12 -18    0.09   49.58
   0  12 -19   14.84   59.54
   0 -12 -19    0.19   72.78
   0  12 -19  -15.91   49.12
   0  12  19    7.92   55.03
   0 -12 -19    5.08   46.55
   0 -12 -20  448.75  110.70
   0  12 -20 1101.45  158.72
   0 -12  20  818.42  114.03
   0  12  20  677.96   90.15
   0 -12 -20  610.90   98.20
   0  12 -21   18.41   58.88
   0 -12  21   39.21   49.05
   0  12  21  114.09   59.43
   0 -12 -21   53.48   43.97
   0  12 -22   99.35   48.15
   0 -12  22   83.10   50.89
   0  12  22   65.65   57.45
   0 -12 -22   66.69   59.47
   0  12 -23  -18.55   53.93
   0 -12  23  -98.50   54.54
   0  12  23  -18.73   50.54
   0 -12 -23   29.34   56.02
   0  12 -24  279.34   60.34
   0 -12  24  277.13   65.46
   0  12  24  132.57   59.01
   0  12 -24  176.49   58.11
   0 -12 -24   65.01   46.22
   0 -12 -25  -39.63   81.25
   0  12 -25   21.13   55.08
   0 -12  25   24.44   54.13
   0  12  25   46.57   67.99
   0  12 -25  -74.98   58.87
   0 -12 -25  -65.22   55.71
   0 -12 -26  236.11   80.01
   0  12 -26  300.73   73.43
   0 -12  26  379.69   71.51
   0  12  26  257.15   58.72
   0  12 -26  505.29   87.87
   0 -12 -26  238.07   64.58
   0 -12 -27   12.14   84.51
   0  12 -27   47.44   63.42
   0 -12  27   59.61   59.01
   0  12  27  -24.14   64.08
   0  12 -27   93.06   61.07
   0 -12 -27   35.13   63.56
   0 -13   0  -26.27   48.81
   0  13   0    8.77   42.11
   0  13   0    5.57   31.59
   0 -13   0  -14.39   47.95
   0  13   0  -14.26   37.82
   0 -13   0    2.30   30.48
   0  13   0  -20.61   40.75
   0 -13  -1 1585.52  207.41
   0 -13   1 1415.40  189.91
   0  13   1 1853.20  196.44
   0  13  -1 1947.82  204.90
   0  13   1 1887.35  195.25
   0  13  -1 1925.07  199.19
   0 -13  -1 1991.17  221.32
   0 -13   1 1919.23  209.69
   0  13   1 1735.70  183.53
   0  13  -1 1942.85  206.36
   0 -13  -1 1761.59  188.47
   0 -13   1 1817.07  190.73
   0  13   1 1920.25  198.87
   0  13  -1 1515.12  155.10
   0 -13  -2  723.15  107.43
   0 -13   2  659.34  106.86
   0  13   2  708.08   94.93
   0  13  -2  779.08   84.98
   0  13   2  747.83   84.55
   0  13  -2  862.23   96.10
   0 -13  -2  734.33   87.55
   0 -13   2  830.80   94.69
   0  13   2  708.16   80.25
   0  13  -2  868.35   93.74
   0 -13  -2  535.27   67.33
   0 -13  -2  754.82   78.83
   0 -13   2  650.25   72.27
   0  13   2  640.77   70.23
   0  13  -2  796.84   85.08
   0 -13  -3  589.54  109.19
   0 -13   3  555.86   86.21
   0  13   3  610.67   96.00
   0  13  -3  680.23   75.12
   0  13   3  662.05   94.70
   0  13  -3  694.57   78.17
   0 -13  -3  656.29   84.07
   0 -13   3  764.27   91.91
   0  13   3  593.83  100.73
   0  13  -3  635.13   70.24
   0 -13  -3  747.37   89.84
   0 -13  -3  629.86   68.37
   0  13   3  469.73   42.26
   0  13  -3  750.14   84.98
   0 -13   4   25.75   52.15
   0 -13  -4   48.19   53.37
   0 -13   4    4.43   46.06
   0  13   4   45.46   57.23
   0  13   4   -3.23   37.90
   0  13  -4   10.23   39.61
   0 -13  -4   28.27   37.64
   0 -13   4   24.63   48.08
   0  13   4    3.12   39.50
   0  13  -4   50.96   45.09
   0 -13  -4   -2.57   40.26
   0 -13  -4   42.05   38.77
   0  13   4   26.96   52.31
   0  13  -4   24.94   37.95
   0 -13  -4    3.17   32.28
   0 -13   5   65.60   52.84
   0 -13  -5   72.35   53.81
   0 -13   5   71.81   54.99
   0  13   5   61.79   47.26
   0  13   5  115.71   42.82
   0  13  -5  116.59   41.95
   0 -13  -5   35.03   37.85
   0 -13   5  111.82   51.74
   0  13   5   89.29   41.82
   0 -13  -5   69.98   54.00
   0  13  -5   86.99   35.09
   0 -13  -5  103.00   38.83
   0  13   5   48.75   42.74
   0 -13   5   37.95   40.44
   0 -13  -5   88.76   40.90
   0 -13   6  244.91   61.62
   0 -13  -6  163.73   52.16
   0 -13   6  185.39   59.24
   0  13   6  161.52   52.93
   0  13   6  267.08   46.44
   0  13  -6  163.98   36.99
   0 -13  -6  146.49   52.38
   0 -13   6  197.37   45.00
   0  13   6  167.29   43.15
   0 -13  -6  269.52   60.77
   0  13  -6  189.78   32.67
   0 -13  -6  232.52   45.22
   0  13   6  215.79   47.16
   0 -13   6  221.02   46.07
   0 -13  -6  203.44   42.86
   0 -13   7  683.13   96.39
   0 -13  -7  461.61   84.28
   0  13   7  519.80   74.19
   0 -13   7  459.60   73.61
   0  13   7  647.50   80.41
   0 -13  -7  423.87   75.33
   0  13  -7  548.82   64.63
   0  13   7  630.29  102.47
   0 -13  -7  415.95   54.95
   0  13  -7  656.01   79.77
   0 -13  -7  419.20   48.71
   0  13   7  438.17   53.96
   0 -13  -7  549.82   71.99
   0 -13   8 2644.35  302.02
   0 -13  -8 1587.53  217.93
   0  13   8 1648.91  205.67
   0 -13   8 1920.82  254.87
   0  13   8 2016.19  228.89
   0 -13  -8 1248.88  175.35
   0  13  -8 2663.49  294.38
   0  13   8 1789.59  216.66
   0 -13  -8 1949.55  232.30
   0 -13  -8 1983.09  246.63
   0  13   8 1794.72  207.76
   0 -13   8 1758.69  196.95
   0 -13  -8 2175.06  264.42
   0 -13   9  156.08   61.60
   0 -13  -9  158.74   56.34
   0 -13   9  114.77   51.25
   0 -13  -9   87.09   40.48
   0  13  -9  145.15   41.38
   0  13   9   58.03   40.47
   0 -13  -9   78.56   36.62
   0 -13   9  164.77   48.05
   0 -13  -9   77.18   41.17
   0 -13  10   33.56   44.56
   0 -13 -10   19.60   56.84
   0 -13  10   30.41   53.60
   0 -13 -10   30.00   48.43
   0 -13 -10   46.07   47.17
   0 -13  10   73.71   39.26
   0 -13 -10   36.72   45.68
   0 -13  11 1323.74  144.60
   0 -13 -11 1000.11  145.41
   0 -13  11 1023.87  115.12
   0 -13 -11  580.82  101.60
   0 -13 -11  863.34  115.22
   0 -13  11 1063.52  108.25
   0 -13 -11  829.60  105.25
   0 -13  12  296.73   68.14
   0 -13 -12  174.80   66.54
   0 -13  12  236.02   48.57
   0 -13 -12  150.62   49.97
   0 -13 -12  203.77   49.55
   0 -13  12  249.32   51.88
   0 -13 -12  232.17   51.17
   0 -13  13  242.39   63.52
   0 -13 -13   80.71   56.32
   0 -13  13  168.24   44.55
   0 -13 -13   49.86   36.38
   0 -13 -13  126.93   42.82
   0 -13  13  170.39   37.38
   0 -13 -14  -56.27   55.42
   0 -13  14    8.14   48.63
   0 -13 -14   10.44   30.65
   0  13 -14   11.58   72.63
   0 -13 -14    7.97   52.10
   0 -13  14   -3.54   35.83
   0 -13 -15  168.36   63.33
   0 -13  15  173.32   49.35
   0 -13 -15  108.40   43.49
   0  13 -15  225.28   40.74
   0 -13 -15  120.08   50.38
   0 -13  15  237.30   51.62
   0 -13 -16   -8.21   55.75
   0 -13  16    3.30   38.16
   0  13 -16   -6.19   43.37
   0 -13 -16   38.63   59.19
   0 -13  16   26.95   43.06
   0 -13 -17    0.92   63.75
   0  13 -17   30.43   29.78
   0 -13 -17  -28.20   52.14
   0 -13  17   21.91   56.09
   0 -13 -18   80.24   67.29
   0  13 -18   -3.63   32.42
   0 -13  18   54.17   77.20
   0  13  18   49.93   39.95
   0 -13 -18   29.51   36.56
   0 -13 -19  156.50   56.85
   0  13 -19  156.92   37.44
   0 -13  19  207.51   66.54
   0  13  19  126.64   51.02
   0 -13 -19  145.00   57.33
   0 -13 -20  247.28   78.42
   0  13 -20  251.06   39.27
   0 -13  20  279.03   57.61
   0  13  20  160.23   62.99
   0 -13 -20  215.30   55.14
   0 -13 -21  140.81   75.70
   0  13 -21  152.26   43.66
   0 -13  21  181.51   58.34
   0  13  21   84.98   49.12
   0 -13 -21  140.78   51.83
   0  13 -22   -3.27   45.28
   0 -13  22    5.37   55.87
   0  13  22    2.94   50.55
   0 -13 -22   11.73   60.66
   0  13 -23   23.96   32.89
   0 -13  23   41.99   53.80
   0  13  23  -14.82   48.94
   0 -13 -23  -72.70   56.06
   0  13 -24  -13.66   39.06
   0 -13  24    5.39   59.10
   0  13  24   46.76   58.30
   0 -13 -24  -75.79   57.91
   0  13 -25   44.13   37.96
   0 -13  25   59.83   60.28
   0  13  25   37.55   59.94
   0 -13 -25   28.30   44.37
   0 -13 -26   43.81   93.07
   0  13 -26    7.76   57.41
   0 -13  26   66.37   61.62
   0  13  26   22.46   62.63
   0 -13 -26   37.64   63.20
   0 -14   0  558.25  109.09
   0  14   0  756.68   77.42
   0  14   0  531.72   56.47
   0 -14   0  566.68   66.79
   0  14   0  781.78   82.69
   0 -14   0  668.49   70.22
   0  14   0  670.32   70.67
   0 -14  -1 1776.21  242.92
   0 -14   1 2163.20  285.21
   0  14   1 1736.64  200.66
   0  14  -1 2114.80  232.61
   0  14   1 1863.45  214.95
   0  14  -1 1456.66  161.14
   0 -14  -1 1611.82  194.23
   0 -14   1 2015.82  228.00
   0  14   1 1799.88  209.03
   0  14  -1 2073.54  236.82
   0 -14  -1 2127.36  239.79
   0 -14   1 1522.82  167.63
   0  14   1 1940.38  219.28
   0  14  -1 1833.40  202.21
   0 -14  -2   39.19   55.05
   0 -14   2   38.26   48.10
   0  14   2   33.20   47.07
   0  14  -2   13.44   48.04
   0  14   2   31.78   43.85
   0  14  -2   40.76   37.20
   0 -14  -2   20.45   37.13
   0 -14   2   -6.28   40.17
   0  14   2   38.37   29.97
   0  14  -2    6.73   36.40
   0 -14  -2   25.69   33.36
   0 -14  -2   37.12   40.70
   0 -14   2   12.84   35.45
   0  14   2   45.50   38.38
   0 -14  -3  614.66  110.08
   0 -14   3  604.23  102.10
   0  14   3  568.35   94.68
   0  14  -3  746.45   96.64
   0  14   3  629.20   79.72
   0  14  -3  564.48   76.59
   0 -14   3  707.42   88.77
   0  14   3  595.75   86.80
   0  14  -3  661.69  106.87
   0 -14  -3  618.71   91.32
   0 -14  -3  692.26   83.90
   0  14   3  634.92   83.66
   0 -14  -3  603.05   80.00
   0 -14   4  940.66  121.63
   0 -14  -4  807.72  137.19
   0 -14   4  687.69  106.03
   0  14   4  757.66  105.96
   0  14   4  675.38   87.63
   0  14  -4  829.52   92.87
   0 -14  -4  665.64  110.85
   0 -14   4  962.38  111.77
   0  14   4  692.24   96.39
   0  14  -4  978.50  106.43
   0 -14  -4  661.90   78.94
   0 -14  -4  723.89   88.75
   0  14   4  798.03   95.15
   0 -14  -4  810.02   96.30
   0 -14   5  -10.61   49.28
   0 -14  -5    1.52   50.18
   0 -14   5    4.33   55.71
   0  14   5   17.55   60.50
   0  14   5  -14.02   41.37
   0  14  -5   -1.81   40.99
   0 -14  -5   24.88   42.47
   0  14   5    7.58   38.73
   0  14  -5  -37.11   43.04
   0 -14  -5    8.50   46.46
   0 -14  -5   61.36   38.84
   0 -14  -5   -2.02   34.86
   0 -14   6  388.73   58.94
   0 -14  -6  309.56   90.11
   0 -14   6  364.23   69.70
   0  14   6  235.88   53.27
   0  14   6  414.25   48.37
   0  14  -6  436.50   52.05
   0 -14  -6  304.60   68.64
   0  14   6  317.78   53.60
   0 -14  -6  350.81   49.93
   0  14  -6  423.93   47.62
   0 -14  -6  406.84   59.45
   0 -14  -6  256.12   42.39
   0 -14   7   79.82   52.12
   0 -14  -7  104.06   55.40
   0 -14   7   65.89   48.97
   0  14   7   77.19   53.01
   0  14   7   83.56   39.20
   0  14  -7   93.23   43.00
   0 -14  -7   36.15   38.22
   0  14   7   83.01   50.77
   0 -14  -7  127.04   55.25
   0  14  -7   50.57   32.77
   0 -14  -7   68.82   31.95
   0 -14  -7   96.68   38.16
   0 -14   8   93.65   63.31
   0 -14  -8   -1.46   42.81
   0 -14   8   35.87   44.71
   0  14   8   57.96   50.35
   0 -14  -8   35.41   36.17
   0  14  -8   62.02   38.02
   0  14   8   41.86   37.48
   0  14  -8  108.32   38.92
   0 -14  -8  118.97   49.60
   0 -14  -8    8.56   49.07
   0 -14   9 2456.22  231.11
   0 -14  -9 2073.00  242.51
   0 -14   9 2036.75  241.61
   0  14   9 2211.45  210.43
   0 -14  -9 1445.14  179.53
   0  14  -9 2673.77  238.10
   0  14   9 2116.04  224.08
   0  14  -9 1978.81  180.70
   0 -14  -9 1962.90  202.39
   0 -14   9 2000.71  179.45
   0 -14  -9 1892.67  187.98
   0 -14  10  162.82   61.83
   0 -14 -10   57.06   45.91
   0 -14  10  175.07   63.61
   0 -14 -10   90.62   52.42
   0  14 -10  212.16   51.23
   0 -14 -10  117.04   50.16
   0 -14  10  153.16   48.42
   0 -14 -10  133.09   54.74
   0 -14  11   49.94   52.93
   0 -14 -11   10.23   68.14
   0 -14  11   68.39   47.85
   0 -14 -11   59.16   43.40
   0 -14 -11   27.20   42.91
   0 -14  11   96.35   41.61
   0 -14 -11   27.62   43.31
   0 -14  12  515.55   78.68
   0 -14 -12  303.84   89.36
   0 -14  12  394.70   60.00
   0 -14 -12  229.91   64.66
   0 -14 -12  286.33   53.72
   0 -14  12  419.98   45.95
   0 -14 -12  396.73   58.78
   0 -14 -13  106.01   63.01
   0 -14  13   96.72   42.92
   0 -14 -13   72.61   50.56
   0 -14 -13   70.87   45.32
   0 -14  13  156.89   47.33
   0 -14 -14   32.45   59.83
   0 -14  14   25.23   42.86
   0 -14 -14   28.61   46.36
   0 -14  14   65.26   47.20
   0 -14 -15   51.00   71.07
   0 -14  15   84.88   46.12
   0  14 -15  103.32   54.21
   0 -14 -15   69.67   47.79
   0 -14  15  110.72   60.21
   0 -14 -16 1209.86  182.16
   0  14 -16 1691.44  202.57
   0 -14 -16  897.79  145.02
   0 -14  16 1219.40  144.80
   0 -14 -17  259.86   72.17
   0  14 -17  306.83   63.05
   0 -14 -17  151.39   55.62
   0 -14  17  364.03   49.92
   0 -14 -18  -58.84   70.21
   0  14 -18  -38.17   51.63
   0 -14  18   49.68   50.66
   0 -14 -19  -41.24   70.02
   0  14 -19  -76.26   66.61
   0 -14  19    8.78   84.95
   0  14  19   24.90   57.37
   0 -14 -19   25.20   50.23
   0 -14 -20  166.97   71.02
   0  14 -20  242.16   58.67
   0 -14  20  250.65   75.44
   0  14  20  153.11   57.46
   0 -14 -20   84.53   59.61
   0 -14 -21  182.40   76.92
   0  14 -21  183.77   66.85
   0 -14  21  174.87   60.11
   0  14  21  150.05   64.83
   0 -14 -21   53.08   56.59
   0 -14 -22  -86.49   89.02
   0  14 -22  149.58   63.35
   0 -14  22   34.83   58.68
   0  14  22    3.36   63.43
   0 -14 -22   32.98   56.17
   0 -14 -23  209.18   87.14
   0  14 -23  281.15   66.54
   0 -14  23  253.95   66.96
   0  14  23  116.65   47.38
   0 -14 -23   62.63   59.24
   0  14 -24  106.16   65.26
   0 -14  24   83.03   54.87
   0  14  24   35.26   54.39
   0 -14 -24    5.88   57.71
   0  14 -25   93.56   70.17
   0 -14  25  233.95   63.56
   0  14  25   28.40   61.25
   0 -14 -25  104.81   68.95
   0 -15   0  -49.91   65.65
   0  15   0   -0.16   46.62
   0  15   0  -12.79   33.88
   0 -15   0   35.28   47.92
   0  15   0   18.65   40.04
   0 -15   0   57.43   37.70
   0 -15  -1  148.36   54.44
   0 -15   1  141.84   58.47
   0  15   1  204.22   54.45
   0  15  -1  123.13   48.95
   0  15   1  109.03   41.56
   0  15  -1   94.81   35.82
   0 -15  -1  106.15   54.10
   0 -15   1  157.60   40.07
   0  15   1  167.35   39.53
   0  15  -1    5.16    1.46
   0 -15   1  171.32   41.98
   0 -15  -2 1488.71  198.57
   0 -15   2 1637.38  215.15
   0  15   2 1828.60  214.19
   0  15  -2 1894.50  213.40
   0  15   2 1868.69  218.76
   0  15  -2 2053.32  248.65
   0 -15  -2 1491.97  190.17
   0 -15   2 1667.71  188.75
   0  15   2 1419.73  166.13
   0  15  -2 1597.37  185.45
   0 -15  -2 1726.94  207.04
   0 -15   2 1819.86  205.24
   0 -15  -3  237.77   57.79
   0 -15   3  185.09   61.15
   0  15   3  271.46   65.35
   0  15  -3  324.78   58.31
   0  15   3  171.84   38.53
   0  15  -3  345.58   50.77
   0 -15  -3  272.63   67.24
   0  15   3  250.46   53.50
   0  15  -3  242.12   50.35
   0 -15  -3  196.77   48.53
   0 -15  -3  277.97   50.79
   0 -15   3  232.13   53.79
   0 -15  -3  227.34   42.97
   0 -15   4   85.39   57.60
   0 -15  -4  117.18   67.53
   0 -15   4   92.79   57.76
   0  15   4   90.33   54.67
   0  15   4   78.82   41.14
   0  15  -4  139.16   41.92
   0 -15  -4   36.03   30.79
   0  15   4   86.52   39.35
   0  15  -4  126.72   44.01
   0 -15  -4   77.94   43.12
   0 -15  -4  126.96   48.97
   0 -15  -4   46.52   38.12
   0 -15   5    3.56   53.72
   0 -15  -5  -21.75   52.86
   0 -15   5   -9.16   38.16
   0  15   5  -51.25   49.94
   0  15   5  -11.22   42.55
   0  15  -5   25.67   36.82
   0 -15  -5   16.54   46.98
   0  15   5    2.57   37.46
   0  15  -5   14.54   41.83
   0 -15  -5  -13.99   44.12
   0 -15  -5    7.70   41.28
   0 -15  -5  -24.91   47.12
   0 -15   6 1384.13  147.20
   0 -15  -6 1151.68  147.87
   0 -15   6 1098.58  153.56
   0  15   6 1289.83  155.56
   0  15   6 1194.71  118.40
   0  15  -6 1561.93  147.80
   0 -15  -6 1043.81  155.27
   0  15   6 1346.42  153.20
   0  15  -6 1676.30  165.62
   0 -15  -6 1381.43  145.75
   0 -15  -6 1217.53  128.67
   0 -15   7  156.75   56.74
   0 -15  -7  181.52   61.21
   0 -15   7  145.36   55.26
   0  15   7  148.60   43.57
   0  15  -7  213.44   46.89
   0 -15  -7  120.08   56.21
   0  15   7  154.77   55.13
   0  15  -7  220.02   43.52
   0 -15  -7  231.08   56.71
   0 -15  -7  103.43   39.81
   0 -15   8   58.08   65.50
   0 -15  -8   38.84   51.87
   0 -15   8   19.70   61.44
   0  15   8   14.72   42.41
   0  15  -8   98.58   53.38
   0 -15  -8   12.09   47.06
   0  15   8  -46.65   36.28
   0  15  -8   28.45   35.87
   0 -15  -8   15.19   39.86
   0 -15  -8    0.86   46.31
   0 -15   9  446.99   70.98
   0 -15  -9  345.39   81.77
   0 -15   9  428.07   87.27
   0  15   9  328.70   49.02
   0 -15  -9  217.48   55.04
   0  15  -9  312.80   50.75
   0  15   9  325.36   62.09
   0  15  -9  483.58   65.57
   0 -15  -9  277.43   45.11
   0 -15   9  383.49   51.39
   0 -15  -9  240.91   53.12
   0 -15  10  956.79  128.63
   0 -15 -10  676.44  107.27
   0 -15  10  788.16  102.80
   0 -15 -10  688.23  101.52
   0  15 -10  877.85  109.84
   0  15 -10  921.96  115.03
   0 -15 -10  817.98  108.89
   0 -15  10 1122.65  138.39
   0 -15 -10  805.92  102.66
   0 -15 -11  -97.63   69.58
   0 -15  11    6.74   58.20
   0 -15 -11   -7.95   50.12
   0  15 -11   68.36   39.85
   0 -15 -11   18.36   46.87
   0 -15  11    0.56   40.89
   0 -15 -11  -10.85   45.04
   0 -15 -12  172.44   66.50
   0 -15  12  110.88   53.30
   0 -15 -12   44.86   49.43
   0 -15 -12   67.86   43.38
   0 -15  12  138.38   53.15
   0 -15 -12   77.83   42.41
   0 -15 -13   64.55   60.51
   0 -15  13   76.11   51.46
   0 -15 -13  130.22   54.45
   0 -15  13  130.96   45.51
   0 -15 -14  574.34  102.51
   0 -15 -14  386.00   56.71
   0 -15  14  612.25   69.10
   0 -15 -15  588.52  100.38
   0 -15 -15  501.10   79.64
   0 -15  15  913.03  120.54
   0 -15 -16   24.56   82.16
   0  15 -16   23.75   54.38
   0 -15 -16   60.24   51.43
   0 -15  16  -11.48   63.71
   0 -15 -17  251.45   75.69
   0  15 -17  539.46   82.03
   0 -15 -17  233.98   60.94
   0 -15  17  507.83   77.01
   0 -15 -18  193.80   76.68
   0  15 -18   55.64   61.53
   0 -15 -18   31.55   55.79
   0 -15  18   61.64   41.90
   0 -15 -19  -64.00   58.04
   0  15 -19  -68.14   60.74
   0 -15  19  -14.13   38.83
   0  15  19   -1.46   58.31
   0 -15 -19  -18.70   45.63
   0 -15 -20    7.21   70.81
   0  15 -20  -17.62   62.56
   0 -15  20  -14.40   50.81
   0  15  20  -11.34   48.49
   0 -15 -20  -30.06   48.78
   0 -15 -21   50.07   86.42
   0  15 -21   56.18   54.48
   0 -15  21   -0.19   62.78
   0  15  21   -0.46   55.56
   0 -15 -21   -7.84   57.17
   0 -15 -22  183.22   84.31
   0  15 -22  380.46   74.19
   0 -15  22  314.82   77.88
   0  15  22  144.95   60.79
   0 -15 -22  236.91   66.68
   0 -15 -23   79.88   84.36
   0  15 -23   52.51   68.44
   0 -15  23   -2.15   68.19
   0  15  23   67.90   70.12
   0 -15 -23   46.66   50.31
   0 -15 -24   43.69   75.28
   0  15 -24   30.15   68.71
   0 -15  24    3.49   70.02
   0  15  24   77.75   57.98
   0 -15 -24    1.85   66.22
   0 -15 -25  -39.57   78.52
   0  15 -25  113.83   74.00
   0 -15  25   56.91   61.05
   0  15  25  -26.48   59.42
   0 -15 -25   21.79   59.08
   0 -16   0 1307.18  161.84
   0  16   0 1754.71  169.54
   0  16   0 2101.27  202.17
   0  16   0 1437.26  160.93
   0 -16   0 1513.10  151.49
   0 -16  -1   63.08   56.85
   0 -16   1   39.73   57.23
   0  16   1   17.23   49.72
   0  16  -1   22.48   49.96
   0  16   1    8.67   42.19
   0  16  -1  -39.60   30.00
   0  16   1   -5.51   31.01
   0  16  -1   -9.30   39.84
   0 -16  -1   27.38   43.63
   0 -16   1   10.64   35.08
   0 -16  -2    8.62   55.43
   0 -16   2   -2.19   64.70
   0  16   2   46.99   49.48
   0  16  -2   78.59   50.56
   0  16   2   75.25   43.07
   0  16  -2   86.73   43.44
   0 -16  -2   46.18   60.56
   0  16   2   12.40   44.45
   0  16  -2   48.24   49.14
   0 -16  -2   54.16   41.54
   0 -16   2   38.98   34.67
   0 -16  -3  173.26   63.21
   0 -16   3  218.29   65.00
   0  16   3  221.48   61.86
   0  16  -3  233.42   63.90
   0  16   3  136.88   52.44
   0  16  -3  232.81   53.46
   0 -16  -3  123.65   49.43
   0  16   3  181.65   56.37
   0  16  -3  196.86   45.32
   0 -16  -3  125.90   33.10
   0 -16  -3  176.76   49.08
   0 -16   3  248.29   41.83
   0 -16  -3  117.33   45.87
   0 -16   4  879.51  110.58
   0 -16  -4  956.85  128.95
   0 -16   4  953.66  142.25
   0  16   4  953.84  121.25
   0  16   4 1117.85  123.81
   0  16  -4  932.80   99.30
   0 -16  -4  749.00  103.19
   0  16   4  757.83  104.16
   0  16  -4 1070.61  149.41
   0 -16  -4 1016.65  114.55
   0 -16  -4  888.30  105.03
   0 -16   5   27.01   53.91
   0 -16  -5  104.80   62.32
   0 -16   5   24.13   60.18
   0  16   5   20.90   50.12
   0  16   5   59.66   46.97
   0  16  -5   58.45   48.86
   0 -16  -5   -2.78   30.38
   0  16   5   20.79   35.93
   0  16  -5   20.13   34.47
   0 -16  -5   -9.43   38.02
   0 -16  -5   45.23   41.53
   0 -16   6  -25.77   53.79
   0 -16  -6   33.31   48.47
   0 -16   6   17.45   54.74
   0  16   6   -6.83   46.67
   0  16  -6  -39.96   36.65
   0 -16  -6   -3.14   55.68
   0  16   6   42.16   48.97
   0  16  -6   35.93   35.29
   0 -16  -6   22.23   45.95
   0 -16  -6   28.56   43.89
   0 -16   7 1137.56  147.08
   0 -16  -7  875.65  137.48
   0 -16   7  979.75  149.74
   0  16   7 1050.34  140.10
   0  16  -7 1218.23  147.36
   0 -16  -7  782.05  118.10
   0  16   7 1001.84  153.26
   0  16  -7 1304.85  172.21
   0 -16  -7  951.16  130.74
   0 -16  -7  971.90  131.63
   0 -16  -8  575.11  107.82
   0 -16   8  546.53  112.00
   0  16   8  737.15   90.15
   0  16  -8  796.19   93.71
   0 -16  -8  385.09   59.30
   0  16   8  591.73  101.03
   0  16  -8  825.91   87.96
   0 -16  -8  605.67   83.00
   0 -16  -8  687.83   84.54
   0 -16  -9  -27.76   63.33
   0 -16   9   73.01   61.77
   0  16   9   31.42   40.67
   0  16  -9   15.91   50.29
   0 -16  -9   46.15   48.06
   0  16   9   35.71   47.80
   0  16  -9   22.91   44.14
   0 -16  -9   57.00   43.44
   0 -16  -9   50.32   43.97
   0 -16 -10  154.22   47.98
   0 -16  10  219.47   66.22
   0  16 -10  177.13   39.83
   0 -16 -10  114.80   42.21
   0  16 -10  254.46   50.64
   0 -16 -10  145.59   49.11
   0 -16  10  259.71   42.67
   0 -16 -10  228.93   54.18
   0 -16 -11  -21.67   69.79
   0 -16  11   32.91   51.34
   0 -16 -11   -3.83   39.41
   0  16 -11   38.75   41.85
   0  16 -11    2.31   34.85
   0 -16 -11    0.45   47.62
   0 -16  11   60.82   45.63
   0 -16 -11   51.97   55.65
   0 -16 -12  269.94   77.28
   0  16 -12  300.57   40.63
   0  16 -12  310.72   39.17
   0 -16 -12  275.17   54.53
   0 -16  12  414.27   45.83
   0 -16 -12  200.80   53.95
   0 -16 -13  -31.19   63.35
   0 -16 -13  -13.39   63.97
   0 -16  13   14.56   48.19
   0 -16 -13   31.21   49.31
   0 -16 -14  143.08   71.06
   0 -16 -14  100.97   55.63
   0 -16  14  284.93   60.06
   0 -16 -15  351.77   76.82
   0 -16 -15  269.10   57.87
   0 -16  15  646.16   87.49
   0 -16 -16  117.00   74.98
   0 -16 -16   53.84   53.19
   0 -16  16   89.70   49.52
   0 -16 -17  191.29   83.34
   0  16 -17  203.36   53.94
   0 -16 -17   69.67   56.32
   0 -16  17  177.99   52.64
   0 -16 -18  -66.35   93.12
   0  16 -18   84.30   57.92
   0 -16 -18   48.47   63.77
   0 -16  18   91.18   71.01
   0 -16 -19  341.17   80.43
   0  16 -19  423.22   61.07
   0 -16  19  332.68   58.48
   0 -16 -20   51.45   72.59
   0  16 -20   95.61   52.51
   0 -16  20  149.90   53.92
   0  16  20   56.34   63.97
   0 -16 -20   99.55   58.06
   0 -16 -21   -8.52   80.65
   0  16 -21  -33.86   60.57
   0 -16  21  -31.74   58.02
   0  16  21   14.31   50.65
   0 -16 -21   -3.40   71.84
   0 -16 -22  179.64   90.83
   0  16 -22  192.03   58.47
   0 -16  22  139.52   57.63
   0  16  22   82.77   62.35
   0 -16 -22  167.10   56.61
   0 -16 -23   19.45  102.43
   0  16 -23  143.36   60.10
   0 -16  23   46.33   61.64
   0  16  23   16.67   64.17
   0 -16 -23    5.60   58.51
   0 -16 -24  292.36   90.88
   0  16 -24  466.18   69.26
   0 -16  24  388.80   60.91
   0  16  24  174.47   71.10
   0 -16 -24  212.49   71.42
   0 -17   0   62.23   59.88
   0  17   0    9.49   57.39
   0  17   0   34.40   39.28
   0  17   0   26.91   42.85
   0 -17   0   43.10   45.17
   0 -17  -1  613.64   95.71
   0 -17   1  680.47  114.36
   0  17   1  734.20   86.03
   0  17  -1  737.80   86.99
   0  17   1  711.06   92.60
   0  17  -1  640.89   74.36
   0  17   1  680.48   96.40
   0  17  -1  599.13   70.81
   0 -17  -1  579.87   75.82
   0 -17   1  711.63   83.85
   0 -17  -2  956.28  148.94
   0 -17   2  999.09  167.80
   0  17   2 1087.09  146.70
   0  17  -2  888.73  110.49
   0  17   2 1012.09  144.40
   0  17  -2  965.98  123.50
   0  17   2 1076.59  148.00
   0  17  -2  995.53  152.04
   0 -17  -2  968.78  127.27
   0 -17   2 1131.17  140.62
   0 -17  -3  691.81  117.29
   0 -17   3  675.05  115.67
   0  17   3  826.68  101.59
   0  17   3  752.18  100.71
   0  17  -3  857.18   56.27
   0  17   3  677.74   98.10
   0  17  -3  702.46   85.90
   0 -17  -3  710.23   83.63
   0 -17   3  889.89  121.50
   0 -17  -3  627.05   77.44
   0 -17   4  152.45   53.55
   0 -17  -4  122.66   68.22
   0 -17   4  143.18   64.27
   0  17   4  131.20   50.94
   0  17  -4  158.72   43.88
   0  17   4  181.52   55.93
   0  17  -4  183.14   49.69
   0 -17  -4  170.58   45.88
   0 -17   4  174.34   43.94
   0 -17  -4  129.22   44.26
   0 -17   5  203.95   57.08
   0 -17  -5  237.93   66.07
   0 -17   5  202.00   59.78
   0  17   5  301.07   58.07
   0  17  -5  329.20   62.63
   0  17   5  155.56   48.14
   0  17  -5  301.23   62.69
   0 -17  -5  284.60   49.93
   0 -17  -5  192.28   40.67
   0 -17  -6  307.49   78.94
   0 -17   6  273.11   80.93
   0  17   6  324.43   56.52
   0  17  -6  345.23   60.72
   0 -17  -6  142.93   38.42
   0  17   6  226.70   56.29
   0  17  -6  343.86   45.81
   0 -17  -6  276.67   61.04
   0 -17  -6  221.61   45.48
   0 -17  -7  434.69   72.83
   0 -17   7  523.26  103.15
   0  17   7  547.99   73.42
   0  17  -7  447.97   52.85
   0 -17  -7  358.16   57.97
   0  17   7  533.51   93.23
   0  17  -7  578.28   63.92
   0 -17  -7  543.25   78.88
   0 -17  -7  434.33   53.38
   0 -17  -8  556.79   79.74
   0 -17   8  528.66   86.10
   0  17   8  678.60   90.15
   0  17  -8  964.70  113.94
   0 -17  -8  434.44   78.67
   0  17   8  634.44  101.15
   0  17  -8  837.31  100.97
   0 -17  -8  538.87   77.54
   0 -17  -8  646.28   87.97
   0 -17  -9   86.35   57.68
   0 -17   9  105.42   56.65
   0  17   9  132.04   55.24
   0  17  -9  222.78   59.15
   0 -17  -9   72.03   50.29
   0  17   9   83.70   47.92
   0  17  -9  113.89   39.72
   0 -17  -9   76.91   42.29
   0 -17  -9   69.23   42.39
   0 -17 -10  192.87   73.79
   0  17 -10  285.20   61.98
   0  17 -10  231.16   52.97
   0 -17 -10  197.95   56.55
   0 -17  10  130.21   40.89
   0 -17 -10  243.18   55.86
   0 -17 -11   51.06   67.03
   0  17 -11  129.69   54.39
   0  17 -11   63.76   46.31
   0 -17 -11   68.07   50.97
   0 -17  11   84.51   44.29
   0 -17 -11   78.41   62.62
   0 -17 -12  -35.59   69.69
   0  17 -12   30.95   42.83
   0  17 -12   88.52   53.80
   0 -17 -12  -28.25   56.81
   0 -17  12   84.63   53.82
   0 -17 -12   62.16   44.87
   0 -17 -13  258.98   77.78
   0  17 -13  227.40   52.70
   0  17 -13  266.05   41.05
   0 -17 -13  258.77   66.92
   0 -17  13  330.25   57.68
   0 -17 -13  191.69   59.19
   0 -17 -14   16.19   77.14
   0 -17 -14  -11.96   48.24
   0 -17  14   37.44   41.22
   0 -17 -15  127.94   71.16
   0 -17 -15   90.20   47.66
   0 -17  15  274.25   46.04
   0 -17 -16  -15.49   66.17
   0 -17 -16  -25.22   60.12
   0 -17  16   45.91   55.98
   0 -17 -17  -21.11   74.48
   0 -17 -17  -15.92   62.18
   0 -17  17  -10.26   53.71
   0 -17 -18   25.38   71.46
   0  17 -18   51.33   53.81
   0 -17 -18   43.21   63.07
   0 -17  18    6.42   55.00
   0 -17 -19  -27.42   75.60
   0  17 -19  -12.35   54.37
   0 -17 -19  -39.29   54.87
   0 -17  19   88.14   52.56
   0 -17 -20    1.19   78.45
   0  17 -20   54.49   63.66
   0  17  20   50.28   43.97
   0 -17 -20   54.53   43.91
   0 -17 -21  334.77   94.71
   0  17 -21  410.75   84.07
   0 -17  21  444.89   79.77
   0  17  21  210.07   66.34
   0 -17 -21  261.21   67.86
   0 -17 -22  205.53   82.04
   0  17 -22  309.83   72.00
   0 -17  22  367.73   75.89
   0  17  22  242.17   63.73
   0 -17 -22  165.79   59.25
   0 -17 -23  208.61   85.95
   0  17 -23  433.16   76.72
   0 -17  23  304.16   55.85
   0  17  23  195.77   63.87
   0 -17 -23  165.12   72.58
   0 -18   0   -1.25   60.45
   0  18   0   35.75   49.71
   0  18   0   24.79   39.82
   0  18   0   59.11   34.73
   0 -18   0   41.04   44.99
   0 -18  -1  212.05   68.75
   0 -18   1  250.89   88.79
   0  18   1  274.54   59.48
   0  18  -1  319.51   58.91
   0  18   1  267.59   60.32
   0  18  -1  268.89   53.31
   0  18   1  180.38   45.36
   0  18  -1  223.29   59.12
   0 -18  -1  353.39   57.33
   0 -18   1  245.76   54.45
   0 -18  -2  -13.22   63.33
   0 -18   2  -18.87   56.37
   0  18   2  -32.57   44.89
   0  18  -2   48.19   48.38
   0  18   2  -15.14   44.02
   0  18  -2   23.53   40.89
   0  18   2   27.62   52.88
   0  18  -2   20.10   45.67
   0 -18  -2   44.19   48.02
   0 -18   2   24.75   34.72
   0 -18  -2  -13.74   44.35
   0 -18   3  259.79   76.21
   0  18  -3   12.04    2.14
   0 -18  -4   72.25   70.12
   0 -18   4   31.76   65.05
   0  18   4   54.73   48.20
   0  18  -4   48.72   43.90
   0  18   4   32.34   45.11
   0  18  -4   36.83   37.81
   0 -18  -4   60.30   53.64
   0 -18   4  141.54   46.18
   0 -18  -4   10.81   43.63
   0 -18  -5  775.63  130.03
   0 -18   5  895.06  137.55
   0  18   5  831.76   97.03
   0  18  -5  907.00  118.18
   0  18   5  918.48  131.09
   0  18  -5 1026.50  110.81
   0 -18  -5  776.61  101.04
   0 -18   5  761.21  105.07
   0 -18  -5  721.18   98.60
   0 -18  -6  102.01   64.76
   0 -18   6  111.22   68.54
   0  18   6  121.23   62.29
   0  18  -6   70.37   50.60
   0  18   6   75.92   47.07
   0  18  -6   74.82   54.00
   0 -18  -6   12.29   50.72
   0 -18  -6   56.59   49.52
   0 -18  -7   54.04   54.76
   0 -18   7   20.60   53.39
   0  18   7   15.51   60.64
   0  18  -7  -26.01   47.32
   0  18   7   -4.38   48.78
   0  18  -7   51.69   45.47
   0 -18  -7   18.10   52.23
   0 -18  -7   30.87   39.68
   0 -18  -8  179.68   62.97
   0  18   8  325.80   54.77
   0  18  -8  324.89   49.11
   0  18   8  188.10   80.10
   0  18  -8  364.17   50.57
   0 -18  -8  227.74   46.13
   0 -18  -8  377.33   62.12
   0 -18  -9  900.15  143.36
   0  18   9 1144.27  149.45
   0  18  -9 1754.41  210.32
   0  18   9  937.42  128.37
   0  18  -9 1425.59  171.41
   0 -18  -9  902.56  126.88
   0 -18  -9 1047.29  139.69
   0 -18 -10   20.54   75.69
   0  18 -10   82.30   50.23
   0  18 -10  -13.44   51.09
   0 -18 -10    5.96   48.41
   0 -18  10   46.59   38.46
   0 -18 -10    5.99   58.08
   0 -18 -11  244.46   95.28
   0  18 -11  286.69   60.81
   0  18 -11  246.83   43.43
   0 -18 -11  142.70   59.64
   0 -18  11  350.09   58.06
   0 -18 -11  259.82   64.13
   0 -18 -12   20.88   74.72
   0  18 -12   32.17   67.17
   0  18 -12   14.41   38.51
   0 -18 -12   23.96   50.77
   0 -18  12  142.02   58.02
   0 -18 -12   61.17   50.70
   0 -18 -13  119.07   72.16
   0  18 -13  176.66   55.46
   0  18 -13  158.52   42.56
   0 -18 -13  171.28   62.85
   0 -18  13  117.82   40.84
   0 -18 -13   62.72   58.41
   0 -18 -14   35.43   71.36
   0  18 -14   12.72   47.03
   0 -18 -14   68.04   53.49
   0 -18  14   81.51   53.02
   0 -18 -15   15.35   76.60
   0 -18 -15   34.48   49.58
   0 -18  15   86.93   50.03
   0 -18 -16  181.77   71.26
   0 -18 -16   93.06   64.44
   0 -18  16  102.32   52.27
   0 -18 -17  141.72   81.91
   0 -18 -17   62.04   68.78
   0 -18  17  221.65   55.79
   0 -18 -18   -7.61   97.53
   0 -18 -18   30.68   53.49
   0 -18  18   12.44   51.02
   0 -18 -19   42.83   96.82
   0  18 -19   22.01   49.72
   0 -18 -19   22.37   63.75
   0 -18  19  -54.57   61.96
   0 -18 -20   25.25   74.67
   0  18 -20   -6.46   48.89
   0 -18  20   21.91   69.68
   0 -18 -21   -2.85  100.42
   0  18 -21   30.22   50.44
   0 -18  21   75.85   59.75
   0  18  21   34.18   60.92
   0 -18 -21  -25.19   58.22
   0 -19   0  -16.59   66.98
   0  19   0   10.43   50.77
   0  19   0   -1.08   46.99
   0 -19   0  -18.18   52.87
   0 -19  -1  569.23   98.64
   0 -19   1  627.04  101.57
   0  19   1  535.47   78.62
   0  19  -1  483.73   63.33
   0  19   1  557.77   70.62
   0  19  -1  444.11   72.34
   0 -19  -1  468.44   70.72
   0 -19   1  590.87   78.04
   0 -19  -2  942.64  151.54
   0 -19   2  957.11  148.28
   0  19   2 1100.55  149.91
   0  19  -2  983.49  133.78
   0  19   2 1000.46  135.20
   0  19  -2 1081.73  141.76
   0 -19  -2 1090.62  149.07
   0 -19   2 1173.58  153.23
   0 -19  -2 1024.62  132.45
   0 -19  -3  -32.47   64.53
   0 -19   3   55.11   64.01
   0  19   3   10.20   57.38
   0  19  -3    8.21   34.97
   0  19   3   13.44   51.31
   0  19  -3   19.06   45.55
   0 -19  -3   33.31   48.71
   0 -19   3   42.17   33.75
   0 -19  -3   14.91   47.94
   0 -19  -4  227.97   77.60
   0 -19   4  190.12   72.88
   0  19   4  120.93   48.08
   0  19  -4  139.35   41.02
   0  19   4  145.60   41.99
   0  19  -4    4.95    1.56
   0 -19  -4   78.86   50.95
   0 -19   4  150.75   37.30
   0 -19  -4  102.97   43.01
   0 -19  -5  109.77   52.98
   0 -19   5   66.77   62.08
   0  19   5  101.66   45.94
   0  19  -5   63.99   43.45
   0  19   5   51.63   48.04
   0  19  -5  133.94   48.92
   0 -19  -5  125.96   47.47
   0 -19   5  116.41   46.02
   0 -19  -5  148.15   57.04
   0 -19  -6  365.91   73.04
   0  19   6  602.14   76.00
   0  19  -6  604.40   76.22
   0  19   6  446.28   66.18
   0  19  -6  534.87   77.68
   0 -19  -6  391.61   61.97
   0 -19  -6  410.14   62.16
   0 -19  -7  124.68   76.82
   0  19   7   91.51   55.19
   0  19  -7  117.64   54.07
   0  19   7  171.81   48.62
   0  19  -7  153.85   47.75
   0 -19  -7  106.13   56.27
   0 -19  -7   59.71   50.66
   0 -19  -8  218.10   55.79
   0  19   8  263.17   71.60
   0  19  -8  375.79   66.06
   0  19   8  182.32   67.04
   0  19  -8  278.64   49.65
   0 -19  -8  168.79   58.57
   0 -19  -8  319.07   71.75
   0 -19  -9   26.45   65.59
   0  19   9   -9.46   49.51
   0  19  -9  -70.22   54.84
   0  19  -9   15.71   43.37
   0 -19  -9   23.74   41.26
   0 -19  -9   -9.88   42.27
   0 -19 -10  866.39  160.62
   0  19 -10 1138.04  157.18
   0  19 -10 1331.47  195.48
   0 -19 -10  678.49   97.10
   0 -19 -10  783.42  126.84
   0 -19 -11  167.65   78.66
   0  19 -11  157.05   61.89
   0  19 -11   88.35   52.23
   0 -19 -11   52.08   62.40
   0 -19  11   69.91   35.63
   0 -19 -11   57.18   46.88
   0 -19 -12  -26.77   84.25
   0  19 -12    3.12   48.91
   0 -19 -12   24.95   60.97
   0 -19  12   23.23   34.94
   0 -19 -12  -39.91   52.85
   0 -19 -13  -25.18   81.11
   0  19 -13  -16.27   57.85
   0 -19 -13  -54.48   57.99
   0 -19  13  -36.46   53.16
   0 -19 -13  -14.85   52.91
   0 -19 -14  191.34   75.97
   0  19 -14  291.97   75.72
   0 -19 -14  213.94   62.03
   0 -19  14  276.55   55.01
   0 -19 -15  274.82   89.88
   0  19 -15  363.19   62.24
   0 -19 -15  188.96   53.91
   0 -19  15  261.29   45.90
   0 -19 -16  -37.48   62.09
   0 -19 -16  -11.66   52.31
   0 -19  16   25.37   61.06
   0 -19 -17   34.21   79.18
   0 -19 -17  -34.27   64.30
   0 -19  17  -61.43   68.55
   0 -19 -18   52.98   73.75
   0 -19 -18   48.48   63.85
   0 -19  18  144.86   61.78
   0 -19 -19  -61.82   81.46
   0 -19 -19   14.39   67.61
   0 -19  19   47.79   53.15
   0 -19 -20  101.38   75.64
   0  19 -20  105.15   58.98
   0 -19 -20   95.82   64.91
   0 -19  20   85.44   52.46
   0 -20   0 1255.50  200.26
   0  20   0 1308.25  179.90
   0  20   0 1314.22  203.72
   0 -20   0 1267.77  190.56
   0 -20  -1  323.71   86.14
   0 -20   1  433.84   90.23
   0  20   1  406.01   52.28
   0  20  -1  513.45   73.02
   0  20   1  390.70   66.93
   0  20  -1  314.44   63.75
   0 -20  -1  387.71   56.62
   0 -20   1  274.74   45.74
   0 -20  -1  312.16   62.49
   0 -20  -2   23.39   69.94
   0 -20   2    5.48   67.32
   0  20   2   26.20   47.45
   0  20  -2   17.72   45.28
   0  20   2    8.36   51.80
   0  20  -2   65.24   51.04
   0 -20  -2    7.10   45.18
   0 -20   2  -16.34   52.90
   0 -20  -2   46.02   48.87
   0 -20  -3  -17.82   91.91
   0 -20   3   42.25   71.08
   0  20   3   32.82   49.90
   0  20  -3    6.12   42.53
   0  20   3   -7.87   56.34
   0  20  -3   -5.80   43.00
   0 -20  -3   -3.06   58.57
   0 -20   3  -72.71   51.20
   0 -20  -3  -23.87   41.18
   0 -20  -4  258.22   64.35
   0  20   4  310.55   53.83
   0  20  -4  195.01   42.78
   0  20   4  227.84   58.92
   0  20  -4  262.80   59.27
   0 -20  -4  173.46   57.20
   0 -20   4  321.65   62.29
   0 -20  -4  102.40   52.52
   0 -20  -5   62.13   74.07
   0  20   5  151.13   54.60
   0  20  -5  142.32   45.79
   0  20   5   94.95   53.69
   0  20  -5    2.87    1.83
   0 -20  -5   77.34   54.94
   0 -20   5  108.20   55.01
   0 -20  -5   74.50   42.15
   0 -20  -6  220.01   65.69
   0  20   6  219.81   60.81
   0  20  -6  186.30   45.67
   0  20   6  159.59   62.09
   0  20  -6  130.72   41.58
   0 -20  -6  216.02   56.67
   0 -20   6  158.76   51.87
   0 -20  -6  123.61   58.28
   0 -20  -7  281.82   73.83
   0  20   7  335.88   63.05
   0  20  -7  401.00   55.62
   0  20   7  320.13   70.72
   0  20  -7  345.41   69.99
   0 -20  -7  202.46   44.48
   0 -20  -7  303.99   66.41
   0 -20  -8  374.30   84.19
   0  20   8  227.59   59.25
   0  20  -8  348.27   61.91
   0  20   8  333.28   63.60
   0  20  -8  256.18   60.84
   0 -20  -8  216.12   59.14
   0 -20  -8  300.10   60.07
   0 -20  -9   -0.96   75.82
   0  20   9   -7.67   57.70
   0  20  -9    6.59   51.49
   0  20  -9  -20.55   48.73
   0 -20  -9   -0.85   50.13
   0 -20  -9    3.34   46.33
   0 -20 -10  101.20   75.94
   0  20 -10  199.56   64.60
   0 -20 -10   86.86   52.41
   0 -20 -10   62.79   55.04
   0 -20 -11  228.73   81.60
   0  20 -11  335.87   72.76
   0 -20 -11  177.99   60.22
   0 -20  11  184.99   50.75
   0 -20 -11  186.50   60.98
   0 -20 -12  242.41   72.60
   0  20 -12  157.19   52.25
   0 -20 -12  110.78   54.07
   0 -20  12  144.65   48.15
   0 -20 -12   38.34   51.39
   0 -20 -13  143.55   67.87
   0  20 -13  262.36   61.62
   0 -20 -13  165.71   61.23
   0 -20  13  127.24   39.98
   0 -20 -13  156.27   64.70
   0 -20 -14  -12.11   74.01
   0  20 -14   -7.29   56.65
   0 -20 -14   32.11   51.26
   0 -20  14   -6.59   60.03
   0 -20 -15  104.19   70.27
   0  20 -15  298.28   66.96
   0 -20 -15  140.76   52.35
   0 -20  15  244.52   56.21
   0 -20 -16  -26.83   79.56
   0  20 -16  102.99   69.59
   0 -20 -16   71.86   53.95
   0 -20  16   18.79   63.63
   0 -20 -17  261.86   88.38
   0 -20 -17  272.27   81.25
   0 -20  17  317.19   60.06
   0 -20 -18   58.78   76.28
   0 -20 -18   94.99   59.59
   0 -20  18   67.95   38.45
   0 -20 -19   13.46   85.33
   0 -20 -19   57.04   64.85
   0 -20  19   52.76   70.27
   0 -21   0  -38.18   75.48
   0  21   0   66.47   54.83
   0  21   0   30.82   51.78
   0 -21   0   43.22   45.83
   0 -21  -1  243.44   66.83
   0 -21   1  221.99   64.86
   0  21   1  241.21   51.33
   0  21  -1  325.15   62.15
   0  21   1  222.61   50.63
   0  21  -1  296.52   58.00
   0 -21  -1  254.48   60.30
   0 -21   1  272.29   56.22
   0 -21  -1  286.51   60.36
   0 -21  -2  100.37   64.52
   0  21   2  116.14   60.70
   0  21  -2  139.22   49.80
   0  21   2  140.79   60.07
   0  21  -2   93.69   46.20
   0 -21  -2   62.96   56.83
   0 -21   2   90.60   49.94
   0 -21  -2  107.81   49.18
   0 -21  -3  417.13   67.27
   0  21   3  426.73   59.26
   0  21  -3  561.88   68.12
   0  21   3  319.32   49.27
   0  21  -3  330.62   83.68
   0 -21  -3  326.61   63.44
   0 -21   3  357.84   63.63
   0 -21  -3  356.02   62.13
   0 -21  -4   29.22   56.08
   0  21   4  -45.85   56.32
   0  21  -4   21.24   44.02
   0  21   4   32.82   56.00
   0  21  -4  -23.43   44.51
   0 -21  -4    3.70   64.05
   0 -21   4   22.39   51.80
   0 -21  -4   26.76   43.64
   0 -21  -5  247.29   77.71
   0  21   5  202.71   53.10
   0  21  -5  171.84   43.82
   0  21   5  285.27   68.70
   0  21  -5  236.86   62.70
   0 -21  -5  245.54   64.26
   0 -21   5  295.87   58.95
   0 -21  -5  211.25   54.22
   0 -21  -6   26.32   63.21
   0  21   6  104.63   64.11
   0  21  -6  124.37   46.76
   0  21   6   41.02   53.09
   0  21  -6    2.76    1.68
   0 -21  -6   52.08   49.44
   0 -21   6  136.65   58.83
   0 -21  -6   93.65   55.04
   0 -21  -7  151.65   75.11
   0  21   7  121.91   59.41
   0  21  -7   88.67   44.43
   0  21   7   96.09   60.80
   0  21  -7   88.47   40.94
   0 -21  -7   32.70   36.83
   0 -21  -7   49.47   57.39
   0 -21  -8  191.09   76.39
   0  21   8  272.05   62.28
   0  21  -8  229.66   74.26
   0  21   8  195.46   57.09
   0 -21  -8  191.19   64.39
   0 -21  -8  137.92   53.66
   0 -21  -9  201.40   78.21
   0  21   9  112.80   54.79
   0  21  -9  145.27   55.07
   0 -21  -9  151.95   57.52
   0 -21  -9  117.44   60.47
   0 -21 -10   51.47   80.33
   0  21 -10   -8.24   61.89
   0 -21 -10   20.77   64.78
   0 -21 -10    2.43   60.97
   0 -21 -11  200.99   73.56
   0  21 -11  182.10   68.10
   0 -21 -11  165.32   67.54
   0 -21 -11  130.93   57.98
   0 -21 -12   38.35   85.58
   0  21 -12   -7.86   65.04
   0 -21 -12  -77.42   63.98
   0 -21  12   54.71   56.87
   0 -21 -12   21.90   53.25
   0 -21 -13  120.47   69.00
   0  21 -13   98.03   70.63
   0 -21 -13  115.95   69.46
   0 -21  13   39.07   62.62
   0 -21 -13   -2.77   63.81
   0 -21 -14  122.35   77.59
   0  21 -14  215.05   59.54
   0 -21 -14  154.25   63.86
   0 -21  14  108.74   43.58
   0 -21 -15  137.47   77.04
   0  21 -15  248.35   71.87
   0 -21 -15   96.47   67.10
   0 -21  15  241.55   44.66
   0 -21 -16  -64.28   83.00
   0  21 -16   19.84   70.70
   0 -21 -16    0.92   60.21
   0 -21  16   -1.50   52.97
   0 -21 -17  269.00   79.54
   0  21 -17  198.68   74.91
   0 -21 -17   54.35   67.96
   0 -21  17  119.47   62.40
   0  22   0    0.33   49.94
   0  22   0  -18.21   45.20
   0 -22   0    5.85   46.95
   0 -22   0   41.27   50.67
   0 -22  -1  228.27   77.90
   0  22   1  261.48   57.60
   0  22  -1  354.39   68.56
   0  22   1  219.78   58.10
   0  22  -1  204.72   75.64
   0 -22  -1  269.85   59.39
   0 -22   1  187.49   62.97
   0 -22  -1  273.62   57.47
   0 -22  -2   31.80   70.49
   0  22   2  -24.88   64.07
   0  22  -2  -23.86   53.96
   0  22   2    8.21   45.29
   0  22  -2   30.35   55.13
   0 -22  -2   32.54   59.91
   0 -22   2   28.20   68.93
   0 -22  -2   35.49   52.61
   0 -22  -3  162.20   69.26
   0  22   3  199.28   58.11
   0  22  -3  231.59   55.57
   0  22   3  217.04   59.32
   0  22  -3  125.85   41.26
   0 -22  -3  128.92   58.95
   0 -22   3  229.42   52.86
   0 -22  -3  201.73   60.78
   0 -22  -4   67.92   66.19
   0  22   4   49.39   41.72
   0  22  -4  130.48   57.15
   0  22   4   40.55   55.75
   0  22  -4   60.99   44.99
   0 -22  -4   52.23   54.82
   0 -22   4   65.28   51.93
   0 -22  -4   16.27   57.95
   0 -22  -5   30.62   59.16
   0  22   5   41.51   54.27
   0  22  -5   16.98   51.01
   0  22   5   18.31   61.08
   0 -22  -5  -11.53   60.00
   0 -22   5   65.04   42.39
   0 -22  -5   54.34   55.94
   0 -22  -6   49.81   79.37
   0  22   6   56.31   64.78
   0  22  -6   18.33   40.61
   0  22   6   45.99   67.97
   0 -22  -6   30.68   50.54
   0 -22   6    7.79   57.71
   0 -22  -6   67.62   52.04
   0 -22  -7   70.15   72.63
   0  22   7  -11.06   48.76
   0  22  -7   19.88   48.82
   0  22   7  -48.57   52.27
   0 -22  -7  -48.76   51.72
   0 -22   7   12.91   58.39
   0 -22  -7  -12.08   55.17
   0 -22  -8  213.95   85.32
   0  22   8  232.14   65.65
   0  22  -8  188.74   47.72
   0 -22  -8  151.44   75.22
   0 -22  -8   57.05   54.23
   0 -22  -9   64.61   87.76
   0  22   9   99.19   53.30
   0  22  -9  203.44   65.07
   0 -22  -9   39.86   51.04
   0 -22  -9   62.23   52.38
   0 -22 -10  -10.66   79.18
   0  22 -10   35.29   50.36
   0 -22 -10   67.38   72.11
   0 -22 -10   26.00   58.75
   0 -22 -11   84.00   83.67
   0  22 -11  134.71   59.81
   0 -22 -11   20.00   72.94
   0 -22 -11   50.00   54.71
   0 -22 -12   -6.10   85.41
   0  22 -12  136.58   68.00
   0 -22 -12   19.31   56.61
   0 -22  12  135.73   55.83
   0 -22 -12   -8.40   57.15
   0 -22 -13   69.28   87.66
   0  22 -13  151.94   66.56
   0 -22 -13   72.53   69.47
   0 -22  13  196.90   52.52
   0 -22 -13  139.75   66.48
   0 -22 -14    6.45   94.57
   0  22 -14  -45.27   68.38
   0 -22 -14   90.72   60.85
   0 -22  14    9.35   55.16
   0 -22 -15   39.02   86.22
   0  22 -15   81.25   80.18
   0 -22 -15   19.82   70.41
   0 -22  15   83.32   62.16
   0  23   0   75.06   62.49
   0  23   0  -12.11   63.78
   0 -23   0   12.32   53.90
   0 -23   0   39.07   57.01
   0  23   1  159.73   60.03
   0  23  -1  133.48   60.70
   0  23   1  125.63   57.24
   0  23  -1  155.81   56.22
   0 -23  -1  125.85   62.42
   0 -23   1   92.65   53.36
   0 -23  -1  113.60   53.66
   0 -23   1  168.51   59.95
   0  23   2  109.12   58.61
   0  23  -2  103.74   55.53
   0  23   2  149.32   60.74
   0  23  -2  143.32   55.55
   0 -23  -2  185.42   60.64
   0 -23   2   87.71   55.68
   0 -23  -2  113.49   61.33
   0  23   3  -12.98   71.91
   0  23  -3   18.80   53.38
   0  23   3   40.79   56.94
   0 -23  -3  -19.04   62.38
   0 -23   3   80.76   46.95
   0 -23  -3   27.99   65.66
   0 -23  -4  -16.94   65.50
   0  23   4   18.02   49.88
   0  23  -4  -18.83   48.65
   0  23   4  -25.52   63.59
   0 -23  -4    7.09   54.17
   0 -23   4  -32.98   56.24
   0 -23  -4   40.61   53.19
   0 -23  -5   27.66   78.14
   0  23   5    5.10   54.42
   0  23  -5  -64.27   62.85
   0  23   5   11.30   53.68
   0 -23  -5   10.24   51.71
   0 -23   5   17.26   57.83
   0 -23  -5   31.94   63.61
   0 -23  -6   82.51   73.86
   0  23   6  136.24   63.45
   0  23  -6   39.54   48.77
   0  23   6  108.91   62.51
   0 -23  -6  112.89   66.67
   0 -23   6   85.74   49.80
   0 -23  -6  106.08   59.94
   0 -23  -7   83.32   95.78
   0  23   7  -55.58   47.79
   0  23  -7  -19.06   39.91
   0  23   7  -31.66   62.66
   0 -23  -7   40.21   74.19
   0 -23   7  -15.72   56.35
   0 -23  -7    4.26   58.66
   0 -23  -8   57.54   75.16
   0  23  -8  111.98   53.03
   0 -23  -8  -35.29   57.79
   0 -23  -8   23.67   52.14
   0 -23  -9  -26.35   77.18
   0  23  -9  118.38   49.60
   0 -23  -9   24.59   65.56
   0 -23  -9   71.32   62.79
   0 -23 -10  249.29   83.86
   0  23 -10  301.26   57.98
   0 -23 -10  131.59   73.01
   0 -23 -10  225.71   64.93
   0 -23 -11  -22.00   83.32
   0  23 -11   61.82   60.37
   0 -23 -11   85.24   73.59
   0 -23 -11   -6.48   57.28
   0 -23 -12  103.92   90.94
   0  23 -12  -42.03   65.50
   0 -23 -12   -6.19   63.13
   0 -23 -12  -21.58   65.29
   0 -23 -13   66.88   80.82
   0  23 -13    5.34   55.23
   0 -23 -13   12.21   62.41
   0 -23  13  -45.12   59.44
   0 -23 -13  -23.12   69.94
   0  24   0  416.56   91.67
   0 -24   0  507.44   91.21
   0 -24   0  340.24   63.67
   0  24   1  -45.11   49.41
   0  24  -1  -12.59   65.99
   0 -24  -1   27.41   56.26
   0 -24   1    0.45   51.57
   0 -24  -1   17.90   50.66
   0 -24   1    8.77   60.58
   0  24   2    5.00   63.09
   0  24  -2   -2.65   50.48
   0  24   2    3.39   62.57
   0 -24  -2   10.59   65.38
   0 -24   2   10.19   54.13
   0 -24  -2    7.32   59.22
   0  24   3   64.37   54.60
   0  24  -3  141.93   60.57
   0  24   3   39.69   57.80
   0 -24  -3   67.96   51.30
   0 -24   3   62.11   60.13
   0 -24  -3   69.21   62.28
   0  24   4   75.99   64.45
   0  24  -4   21.21   71.83
   0  24   4   90.86   51.62
   0 -24  -4  108.15   60.66
   0 -24   4   66.78   56.03
   0 -24  -4   29.10   69.94
   0  24   5  130.16   57.69
   0  24  -5  226.47   67.40
   0  24   5  159.80   63.40
   0 -24  -5   13.76   61.02
   0 -24   5  163.94   66.66
   0 -24  -5   94.89   58.03
   0  24   6    1.56   60.57
   0  24  -6  -79.40   66.66
   0  24   6  -25.37   65.31
   0 -24  -6   -2.28   44.11
   0 -24   6  -46.71   59.91
   0 -24  -6  -35.96   59.81
   0 -24  -7  304.27   98.47
   0  24  -7  306.62   57.51
   0 -24  -7  143.72   73.60
   0 -24   7  249.94   62.60
   0 -24  -7  224.07   61.13
   0 -24  -8  -39.61   91.64
   0  24  -8   53.92   47.78
   0 -24  -8   51.13   72.28
   0 -24   8   92.12   63.71
   0 -24  -8   19.86   57.79
   0 -24  -9  147.57   80.89
   0  24  -9  201.60   46.58
   0 -24  -9   45.23   66.83
   0 -24  -9   47.71   64.60
   0 -24 -10  111.12   69.76
   0  24 -10   88.45   58.59
   0 -24 -10   26.36   74.10
   0 -24 -10   -9.73   62.75
   0  25   0   96.13   62.71
   0 -25   0  -26.96   62.13
   0 -25   0  -69.09   53.94
   0  25   1  170.36   57.98
   0  25  -1  134.97   60.08
   0 -25  -1  111.40   63.24
   0 -25   1  124.52   62.87
   0 -25  -1   61.73   66.46
   0 -25   1   96.96   58.49
   0  25   2   -2.94   65.74
   0  25  -2  -13.44   48.70
   0 -25  -2   -3.77   61.96
   0 -25   2   35.00   63.40
   0 -25  -2  -12.60   68.90
   0 -25   2   33.68   66.27
   0  25   3  321.01   64.83
   0  25  -3  344.46   65.95
   0 -25  -3  277.56   69.86
   0 -25   3  407.42   73.77
   0 -25  -3  234.51   57.85
   0  25   4    3.08   62.86
   0  25  -4  -77.64   66.01
   0 -25  -4  -12.34   62.90
   0 -25   4   82.58   59.56
   0 -25  -4  -28.24   62.22
   0  25  -5   66.00   64.51
   0  25   5   60.37   56.30
   0 -25  -5   84.44   77.28
   0 -25   5   22.58   51.36
   0 -25  -5   16.79   61.41
   1   0 -30  -53.23   80.84
   1   0 -30    2.20   54.47
  -1   0  30   64.99   52.68
   1   0 -30   24.07   62.76
   1   0 -29   42.71   84.00
   1   0 -29   41.31   62.92
  -1   0  29   26.27   54.27
   1   0 -29    5.49   59.37
   1   0 -28  -57.78   70.32
   1   0 -28   44.05   50.79
  -1   0  28  -26.31   56.75
   1   0 -28   88.57   56.76
   1   0 -27  461.73   82.97
   1   0 -27  368.95   70.70
  -1   0  27  345.58   64.31
   1   0 -27  368.08   60.74
   1   0 -26   10.95   71.61
   1   0 -26  -10.37   55.90
  -1   0  26   -3.13   55.36
   1   0 -26  -97.47   53.46
   1   0 -25  451.33   76.18
   1   0 -25  396.04   72.98
  -1   0  25  373.62   60.93
   1   0 -25  446.27   64.61
   1   0 -24  -41.71   61.82
   1   0 -24  -47.02   51.86
  -1   0  24  -12.12   44.33
   1   0 -24  -35.46   47.74
   1   0 -23  546.18   82.99
   1   0 -23  513.66   72.66
  -1   0  23  513.41   66.45
   1   0 -23  414.72   62.26
   1   0 -22  -14.57   61.23
   1   0 -22   -7.54   48.92
  -1   0  22    7.30   42.83
   1   0 -22   19.51   50.92
   1   0 -21  645.32   89.99
   1   0 -21  484.98   65.34
  -1   0  21  582.09   73.32
   1   0 -21  581.97   74.96
   1   0 -20   -3.24   49.47
   1   0 -20   31.43   45.48
  -1   0  20  -31.28   52.96
   1   0 -20  -12.84   41.85
   1   0 -19 2718.24  299.17
  -1   0  19 2658.66  327.36
   1   0 -19 2522.32  280.22
  -1   0  19 2927.96  319.29
   1   0 -19 2616.75  292.68
   1   0 -19 2654.84  293.19
   1   0 -18  -21.50   50.56
  -1   0  18   26.19   56.40
   1   0 -18  -12.34   36.94
  -1   0  18    8.65   38.56
   1   0 -18   -8.12   41.10
   1   0 -18    6.99   43.90
   1   0 -17  457.60   70.01
  -1   0  17  357.46   67.88
   1   0 -17  325.71   49.48
  -1   0  17  337.56   52.61
   1   0 -17  365.67   52.97
   1   0 -17  335.50   55.87
  -1   0  17  347.68   50.40
   1   0 -16  -22.92   46.14
  -1   0  16   -4.54   56.51
   1   0 -16  -28.61   44.74
  -1   0  16   -1.60   36.84
   1   0 -16  -28.72   36.24
   1   0 -16   50.99   42.39
  -1   0  16   -6.41   45.62
   1   0 -15  582.38   82.35
  -1   0  15  550.87   85.98
   1   0 -15  430.12   48.67
   1   0 -15  440.75   46.53
  -1   0  15  423.30   42.42
   1   0 -15  525.41   66.82
   1   0 -15  442.11   50.69
  -1   0  15  654.47   78.25
   1   0 -14  -20.43   62.18
  -1   0  14   17.47   59.25
   1   0 -14   -7.68   40.26
   1   0 -14  -20.38   37.74
  -1   0  14  -18.27   38.49
   1   0 -14  -27.51   29.96
   1   0 -14   -8.61   35.46
  -1   0  14   11.35   39.34
   1   0 -13 2378.47  236.35
  -1   0  13 2357.94  243.73
   1   0 -13 2197.15  211.93
   1   0 -13 1980.95  195.01
  -1   0  13 2067.77  199.05
   1   0 -13 2168.74  212.57
   1   0 -13 2223.56  214.79
  -1   0  13 2061.02  196.83
   1   0 -12   -3.60   42.70
  -1   0  12   -6.38   65.21
   1   0 -12    9.33   39.58
   1   0 -12  -19.25   35.00
  -1   0  12    5.50   33.14
   1   0 -12  -11.61   38.11
   1   0 -12  -24.64   29.39
   1   0 -11 8438.13  598.00
  -1   0  11 8452.01  631.55
   1   0 -11 8557.27  600.88
   1   0 -11 6278.55  449.48
  -1   0  11 8295.80  583.62
   1   0 -11 7599.89  532.15
   1   0 -11 7767.51  547.61
   1   0 -10  -13.96   47.58
  -1   0  10   64.37   60.15
   1   0 -10  -14.16   41.52
   1   0 -10  -10.15   43.09
  -1   0  10  -25.44   36.96
   1   0 -10   22.93   39.25
   1   0  -9 1929.97  139.60
  -1   0   9 1811.97  134.69
   1   0  -9 1952.65  132.20
   1   0  -9 1808.22  128.36
  -1   0   9 1656.77  101.28
   1   0  -9 1628.37  100.26
   1   0  -8    6.06   44.28
  -1   0   8  -14.86   49.80
   1   0  -8    6.11   43.45
   1   0  -8   14.23   38.66
  -1   0   8    5.12   31.83
   1   0  -8  -11.53   35.24
   1   0  -7 2987.00  193.53
  -1   0   7 2744.84  178.45
   1   0  -7 2846.45  178.04
  -1   0   7 2557.87  164.16
   1   0  -7 2819.53  176.31
   1   0  -6   35.96   52.25
  -1   0   6   24.75   51.99
   1   0  -6   15.38   43.66
  -1   0   6    2.28   36.42
   1   0  -6  -17.99   37.62
   1   0  -5   68.21   58.65
  -1   0   5   59.98   54.83
  -1   0   5   51.29   43.30
   1   0  -5   33.36   33.76
  -1   0   5   19.41   43.65
   1   0  -4  -36.39   56.29
  -1   0   4   -6.51   53.22
  -1   0   4  -47.66   75.16
   1   0  -4  -42.27   72.59
  -1   0   4    4.52   38.47
  -1   0   3  442.21   60.60
  -1   0   3  402.18   61.73
  -1   0   3  444.82   53.19
  -1   0  -3 1106.39   98.80
  -1   0  -3 1205.06  122.16
  -1   0  -3  797.10   56.54
  -1   0  -3 1104.50   94.54
   1   0   4    2.83   55.40
   1   0   4   16.09   76.88
  -1   0  -4   -9.61   49.36
  -1   0  -4    2.18   41.31
   1   0   4  -21.22   41.63
   1   0   545697.15  400.23
  -1   0  -543202.27 1245.62
  -1   0  -544735.68  346.33
   1   0   541335.35 1189.20
  -1   0  -542194.07 1208.02
   1   0   543624.22  339.26
  -1   0  -6   -1.31   49.76
   1   0   6  -27.62   52.99
  -1   0  -6   -8.91   36.52
   1   0   6   -2.60   42.17
  -1   0  -6  -43.78   48.15
   1   0   6   25.05   41.59
  -1   0  -6  -12.21   38.41
   1   0   6  -15.81   42.97
  -1   0  -724796.96  755.02
   1   0   727455.48  822.60
  -1   0  -723804.04  732.66
   1   0   726811.19  869.32
   1   0   724437.40  722.66
   1   0   722305.73  662.15
  -1   0  -725872.58  758.97
   1   0   726116.90  768.04
  -1   0  -8    7.39   45.85
   1   0   8   -9.08   50.94
   1   0   8   -1.97   45.04
   1   0   8   -6.82   34.75
   1   0   8  -15.66   56.17
  -1   0  -8    3.70   34.01
   1   0   8   -1.65   39.61
  -1   0  -9 8208.27  312.35
   1   0   9 8417.35  308.06
  -1   0  -9 7104.25  254.91
   1   0   9 7682.98  320.26
   1   0   9 7522.14  260.32
   1   0   9 7245.30  243.32
  -1   0  -9 7670.57  257.62
   1   0   9 7738.13  257.54
  -1   0 -10   20.55   57.85
   1   0  10   -6.79   55.08
  -1   0 -10    1.82   33.59
   1   0  10    2.54   37.94
   1   0  10  -23.92   33.60
   1   0  10  -21.75   27.93
  -1   0 -10  -32.40   37.14
  -1   0 -10   22.11   37.73
   1   0  10   18.59   32.83
  -1   0 -11 5644.01  443.04
   1   0  11 5841.75  436.67
  -1   0 -11 4003.52  323.26
   1   0  11 5425.23  426.40
   1   0  11 5404.38  387.02
   1   0  11 5360.29  382.38
  -1   0 -11 4298.83  314.22
  -1   0 -11 5426.06  389.33
   1   0  11 5808.57  415.49
  -1   0 -12  -10.24   48.44
   1   0  12  -17.22   57.82
  -1   0 -12   11.53   33.35
   1   0  12  -16.39   46.14
   1   0  12  -24.75   36.82
   1   0  12   33.01   35.79
  -1   0 -12   -0.75   46.99
  -1   0 -12   28.51   36.12
   1   0  12   13.46   44.03
  -1   0 -13 1539.40  156.99
   1   0  13 1312.51  136.65
  -1   0 -13 1052.81  116.85
   1   0  13 1254.34  132.07
   1   0  13 1591.44  133.07
   1   0  13 1287.53  106.17
  -1   0 -13 1364.95  120.65
  -1   0 -13 1504.53  124.16
   1   0  13 1359.75  113.12
  -1   0 -14   26.38   54.05
   1   0  14   16.64   51.21
  -1   0 -14  -36.80   31.29
   1   0  14  -16.23   49.67
   1   0  14   11.86   36.35
   1   0  14    8.87   42.57
  -1   0 -14  -12.54   41.17
  -1   0 -14   24.60   43.34
   1   0  14  -29.51   40.82
  -1   0 -15  183.29   49.15
   1   0  15  179.68   62.55
  -1   0 -15  153.02   45.16
   1   0  15  148.87   48.89
   1   0  15  207.90   49.62
   1   0  15  182.42   42.34
  -1   0 -15  159.38   39.76
  -1   0 -15  207.64   45.65
   1   0  15  243.40   51.97
  -1   0 -16    4.28   44.73
   1   0  16  -14.29   58.51
  -1   0 -16   14.05   37.17
   1   0  16    2.85   39.85
   1   0  16   35.65   35.62
   1   0  16  -10.41   32.98
  -1   0 -16   15.59   43.04
  -1   0 -16   -0.64   41.44
   1   0  16   21.64   35.57
  -1   0 -17  877.86   96.60
   1   0  17 1022.61  149.57
  -1   0 -17  737.02   88.43
   1   0  17  903.08   77.15
  -1   0 -17  839.51   88.24
  -1   0 -17  888.16   81.59
   1   0  17  940.63  114.75
  -1   0 -18   -0.42   54.96
   1   0  18  -22.27   61.81
   1   0  18   43.79   45.04
  -1   0 -18    3.31   46.21
   1   0  18  -10.62   37.37
  -1   0 -19 3969.50  444.57
  -1   0 -19 3576.93  427.64
   1   0  19 4173.81  442.20
  -1   0 -19 3857.49  417.98
  -1   0 -20  -17.48   63.31
  -1   0 -20  -53.31   43.49
   1   0  20  -20.69   37.05
  -1   0 -20  -35.50   39.11
  -1   0 -21 1263.69  145.83
  -1   0 -21  993.90  139.11
   1   0  21 1408.74  153.53
  -1   0 -21 1211.32  142.05
  -1   0 -22  -15.01   62.00
  -1   0 -22   20.67   36.90
   1   0  22  -17.28   39.44
  -1   0 -22   29.60   48.35
  -1   0 -23   37.53   59.02
  -1   0 -23   30.26   47.97
   1   0  23   48.11   45.92
  -1   0 -23   41.22   58.98
  -1   0 -24  -55.30   69.71
  -1   0 -24   -5.60   46.29
   1   0  24   35.46   57.55
  -1   0 -24  -19.13   56.04
  -1   0 -25  210.34   68.02
  -1   0 -25  160.19   54.96
   1   0  25  233.59   58.87
  -1   0 -25  249.43   53.45
  -1   0 -26   16.38   71.72
  -1   0 -26   -6.84   52.31
   1   0  26  -21.67   48.11
  -1   0 -26   20.35   47.18
  -1   0 -27  307.87   82.17
  -1   0 -27  168.80   61.20
   1   0  27  267.94   66.90
  -1   0 -27  189.24   56.77
  -1   0 -28  -65.25   63.54
   1   0  28   -0.13   62.87
  -1   0 -28  -39.08   50.27
  -1   0 -29   33.73   79.00
   1   0  29  110.52   62.09
  -1   0 -29   45.83   67.23
  -1   0 -30  102.69   79.42
   1   0  30   12.88   71.33
  -1   0 -30   44.18   55.15
   1   1 -30   14.00   77.36
   1  -1 -30   52.97   80.65
   1   1 -30  -50.81   54.01
  -1  -1  30  -22.51   47.60
  -1   1  30  -18.36   56.60
   1   1 -30   11.74   54.56
   1  -1 -30   -5.69   59.73
   1   1 -29   36.69   67.98
   1  -1 -29   35.66   73.83
   1   1 -29   67.25   66.69
   1  -1 -29   28.38   54.64
  -1  -1  29   85.01   55.64
  -1   1  29   18.68   55.69
   1   1 -29   82.53   67.43
   1  -1 -29  144.97   62.09
   1   1 -28  371.15   93.80
   1  -1 -28  359.63   87.07
   1   1 -28  334.81   71.48
   1  -1 -28  331.49   65.02
  -1  -1  28  346.06   62.05
  -1   1  28  349.75   66.06
   1   1 -28  275.81   56.07
   1  -1 -28  289.22   67.77
   1   1 -27  -57.17   61.11
   1  -1 -27   71.83   68.89
   1   1 -27   -7.69   53.40
   1  -1 -27   10.74   62.32
  -1  -1  27  -20.18   45.87
  -1   1  27   -1.02   46.41
   1   1 -27   -9.91   57.15
   1  -1 -27   23.01   67.86
   1   1 -26    5.49   68.40
   1  -1 -26  -52.30   84.00
   1   1 -26  -61.04   55.28
   1  -1 -26  -57.58   64.64
  -1  -1  26   33.67   54.24
  -1   1  26   23.64   55.14
   1   1 -26    1.10   46.20
   1  -1 -26  -34.46   50.59
   1   1 -25  196.46   72.06
   1  -1 -25  165.97   68.13
   1   1 -25  115.25   51.14
   1  -1 -25   76.17   51.23
  -1  -1  25  100.25   52.69
  -1   1  25   90.13   53.01
   1   1 -25  160.94   58.62
   1  -1 -25   66.38   59.29
   1   1 -24 1767.96  219.38
   1  -1 -24 1500.03  200.45
   1   1 -24 1699.31  219.22
   1  -1 -24 1379.21  177.99
  -1  -1  24 1620.93  194.50
  -1   1  24 1591.70  210.66
   1   1 -24 1550.52  191.22
   1  -1 -24 1513.24  192.12
   1   1 -23  788.96  100.63
   1  -1 -23  946.62  123.79
   1   1 -23  904.97  117.94
   1  -1 -23  659.22   98.24
  -1  -1  23  966.01  114.19
  -1   1  23  831.05  109.75
   1   1 -23  847.08  103.36
   1  -1 -23  870.12  111.12
   1   1 -22  105.20   70.60
   1  -1 -22   70.65   57.32
   1   1 -22   53.78   55.11
   1  -1 -22   35.27   45.68
  -1  -1  22   44.28   52.82
  -1   1  22   70.79   58.04
   1   1 -22   41.94   56.49
   1  -1 -22   20.07   50.76
   1   1 -21  773.49   97.91
   1  -1 -21  677.20   85.37
   1   1 -21  682.22   84.89
   1  -1 -21  627.34   82.67
  -1  -1  21  730.48   80.92
  -1   1  21  736.32   79.42
   1   1 -21  807.58   90.24
   1  -1 -21  719.54   89.12
   1   1 -20  300.72   66.45
   1  -1 -20  239.47   61.01
  -1  -1  20  260.82   72.00
   1   1 -20  228.91   42.80
   1  -1 -20  174.66   41.72
  -1  -1  20  247.60   49.72
  -1   1  20  204.92   40.17
   1  -1 -20  188.84   50.66
   1   1 -20  276.96   52.42
   1  -1 -20  179.89   48.57
   1   1 -19  121.35   56.96
   1  -1 -19  167.70   55.37
  -1  -1  19  177.48   70.76
  -1   1  19  163.73   72.29
   1   1 -19  203.66   53.56
   1  -1 -19  129.05   46.73
  -1  -1  19  199.60   42.52
  -1   1  19  181.83   46.63
   1   1 -19  211.85   53.40
   1  -1 -19  133.89   37.57
   1   1 -19  180.46   45.91
   1  -1 -19  265.68   51.61
   1   1 -18   97.93   42.62
   1  -1 -18  155.64   57.08
  -1  -1  18  135.21   61.78
  -1   1  18   82.34   62.58
   1   1 -18  218.93   47.91
   1  -1 -18  104.02   46.79
   1   1 -18  139.95   47.75
  -1  -1  18  166.71   41.34
  -1   1  18  133.36   37.55
   1   1 -18   94.05   45.44
   1  -1 -18   94.11   44.43
   1   1 -18  145.34   45.92
   1  -1 -18   95.06   48.31
   1   1 -17   68.38   52.95
   1  -1 -17   25.64   65.95
  -1  -1  17   96.23   55.84
  -1   1  17   14.58   61.18
   1   1 -17   35.79   44.33
   1  -1 -17   63.76   39.86
   1   1 -17    7.60   36.50
  -1  -1  17   38.38   42.95
  -1   1  17   43.43   44.29
   1   1 -17   42.90   44.64
   1  -1 -17   34.44   36.63
   1   1 -17   26.09   39.30
   1  -1 -17   46.71   42.40
   1   1 -16  668.20   80.07
   1  -1 -16  653.16   98.27
  -1  -1  16  660.86   99.74
  -1   1  16  602.27   86.28
   1   1 -16  682.86   76.25
   1  -1 -16  698.36   82.39
   1   1 -16  634.79   76.73
  -1  -1  16  700.27   74.43
  -1   1  16  694.56   73.90
   1   1 -16  628.58   72.57
   1  -1 -16  545.44   68.89
   1   1 -16  692.47   78.88
   1  -1 -16  619.44   67.41
  -1  -1  16  770.91   83.85
   1   1 -15  829.32   98.13
   1  -1 -15  824.12   99.07
  -1  -1  15  820.80   94.83
  -1   1  15  764.07  108.64
   1   1 -15  678.38   71.87
   1  -1 -15  846.71   91.05
   1   1 -15  747.89   80.88
  -1  -1  15  744.98   81.09
  -1   1  15  824.98   84.79
   1   1 -15  740.34   82.90
   1  -1 -15  722.78   77.96
   1   1 -15  651.94   75.68
   1  -1 -15  816.30   89.02
  -1  -1  15  695.66   73.26
  -1   1  15  671.39   70.56
   1   1 -14  479.30   53.09
   1  -1 -14  485.27   62.06
  -1  -1  14  542.20   96.82
  -1   1  14  528.86   79.19
   1   1 -14  513.53   49.31
   1  -1 -14  479.12   53.71
   1   1 -14  440.83   45.72
  -1  -1  14  540.25   52.07
  -1   1  14  442.57   47.12
   1   1 -14  456.38   49.78
   1  -1 -14  458.55   53.29
   1   1 -14  578.94   72.17
   1  -1 -14  444.43   49.26
  -1  -1  14  482.12   55.75
  -1   1  14  398.06   42.55
   1   1 -13  693.11   73.54
   1  -1 -13  690.64   68.59
  -1  -1  13  655.49   74.55
  -1   1  13  562.83   88.54
   1   1 -13  728.18   57.52
   1  -1 -13  573.14   58.60
   1   1 -13  528.39   59.22
  -1  -1  13  644.88   57.22
  -1   1  13  653.01   56.31
   1   1 -13  633.87   57.96
   1  -1 -13  567.74   64.10
   1   1 -13  660.74   55.13
   1  -1 -13  606.30   60.66
  -1   1  13  615.82   56.27
   1   1 -12 2521.43  247.22
   1  -1 -12 2276.37  223.85
  -1  -1  12 2449.83  245.25
  -1   1  12 2391.41  254.41
   1   1 -12 2138.51  205.36
   1  -1 -12 2473.90  237.26
   1   1 -12 2168.18  212.84
  -1  -1  12 2279.39  219.18
  -1   1  12 2017.23  193.11
   1   1 -12 2333.23  223.96
   1  -1 -12 2245.28  217.29
   1   1 -12 2046.08  199.43
   1  -1 -12 2357.79  225.40
  -1   1  12 2257.68  218.87
   1   1 -11 1296.47  116.48
   1  -1 -11 1460.45  136.48
  -1  -1  11 1351.38  123.16
  -1   1  11 1160.55  114.15
   1   1 -11 1368.29  116.41
   1  -1 -11 1290.65  109.14
   1   1 -11 1148.40  104.97
  -1  -1  11 1262.10  108.08
  -1   1  11 1186.96  100.93
   1   1 -11 1358.54  113.88
   1  -1 -11 1193.33  104.08
   1  -1 -11 1297.01  110.06
   1   1 -10   15.34   41.98
   1  -1 -10   40.51   49.77
  -1  -1  10   -1.87   58.01
  -1   1  10  -22.62   53.52
   1   1 -10    3.30   40.41
   1  -1 -10   17.14   36.19
   1   1 -10  -39.91   43.05
   1  -1 -10  -19.05   41.05
  -1  -1  10   11.07   37.34
  -1   1  10   13.55   34.05
   1   1 -10   17.49   32.81
   1  -1 -10   17.61   42.52
   1  -1 -10   24.84   36.93
   1   1  -9  236.27   53.05
   1  -1  -9  212.33   39.41
  -1  -1   9  244.07   56.69
  -1   1   9  172.02   58.30
   1   1  -9  180.07   41.70
   1  -1  -9  228.93   43.42
   1  -1  -9  189.37   45.22
  -1  -1   9  175.74   45.12
  -1   1   9  184.59   38.81
   1   1  -9  229.95   41.76
   1  -1  -9  209.34   47.27
   1  -1  -9  123.42   31.45
   1   1  -8  220.39   55.52
   1  -1  -8  195.01   47.47
  -1  -1   8  224.31   57.96
  -1   1   8  163.76   61.43
   1   1  -8  205.13   46.78
   1  -1  -8  157.36  100.47
  -1  -1   8  181.89   38.17
   1   1  -8  100.08   33.58
  -1   1   8  160.78   38.28
   1  -1  -8  226.40   45.82
   1   1  -7 1303.33   97.59
   1  -1  -7 1349.67  103.39
  -1  -1   7 1285.33  102.09
  -1   1   7 1279.93  100.57
   1   1  -7 1311.85   91.75
   1  -1  -7 1312.54  218.89
  -1  -1   7 1101.45   78.75
   1   1  -7 1141.63   80.88
  -1   1   7 1146.96   80.84
   1  -1  -7 1180.02   84.36
  -1   1   7 1163.69   83.56
   1   1  -6 1398.71   94.16
   1  -1  -6 1897.62  142.43
  -1  -1   6 1874.15  139.05
  -1   1   6 1543.72  106.16
   1   1  -6 1699.79  110.57
   1  -1  -6 1262.94  140.71
  -1  -1   6 1639.17  103.30
   1   1  -6 1498.43   94.56
  -1   1   6 1646.94  103.15
   1  -1  -6 1545.72   98.44
  -1  -1   6 1524.42   99.33
  -1   1   6 1454.78   91.68
   1   1  -511950.40  387.76
   1  -1  -511952.96  389.04
  -1  -1   512536.08  405.53
  -1   1   511159.79  364.49
   1   1  -510505.13  337.61
   1  -1  -5 9971.07  594.38
  -1  -1   511309.68  357.27
  -1   1   511291.79  356.52
   1  -1  -5 9559.36  301.71
  -1  -1   511415.44  359.81
  -1   1   511419.47  360.47
   1   1  -4 2197.15  178.20
   1  -1  -4 2322.06  162.02
  -1  -1   4 2541.95  218.56
  -1   1   4 2306.95  157.87
  -1  -1   4 2261.48  151.17
   1   1  -4 2320.09  152.98
  -1   1   4 2159.98  151.94
  -1  -1   4 2308.91  150.69
   1  -1  -4 1959.07  127.93
  -1   1   4 2221.25  145.41
   1   1  -3   10.91   71.97
   1  -1  -3   20.32   46.33
  -1   1   3   16.86   47.09
  -1  -1   3   19.06   67.34
   1   1  -3   51.26   73.91
  -1   1   3   19.46   49.53
   1   1  -3  -10.60   36.92
  -1  -1   3   26.31   41.27
   1  -1  -3   17.33   38.35
  -1   1   3   33.76   41.00
  -1  -1  -3   98.66    3.36
   1  -1   419562.62  587.12
  -1   1  -418012.73  534.53
   1  -1   421804.81  643.18
  -1  -1  -421538.29  793.29
   1   1   420016.38  976.07
   1   1   418832.68  555.11
  -1  -1  -422975.84  677.52
   1  -1   420039.73  597.78
  -1   1  -422931.70  676.09
   1  -1   419632.51  578.25
  -1  -1  -423130.71  681.80
   1   1   420298.57  596.79
  -1   1  -5 3708.20  233.09
   1  -1   5 3811.13  237.90
  -1   1  -5 3699.98  224.37
   1  -1   5 3972.01  239.25
  -1  -1  -5 3629.82  290.56
   1   1   5 3112.95  328.55
   1   1   5 3719.93  225.03
  -1  -1  -5 3261.65  197.56
   1  -1   5 3742.77  227.88
  -1   1  -5 3250.17  200.09
  -1   1  -5 3637.88  219.37
   1  -1   5 3662.53  220.71
  -1  -1  -5 3920.92  234.69
   1   1   5 3069.24  184.80
  -1   1  -6 1728.90  117.62
   1  -1   6 1849.67  136.24
   1   1   6 1522.14  112.57
  -1   1  -6 1482.08   94.50
   1  -1   6 1750.08  109.34
  -1  -1  -6 1674.01  111.28
   1   1   6 1554.06  148.81
  -1  -1  -6 1374.21   86.40
   1  -1   6 1655.88  104.12
  -1   1  -6 1631.50  112.63
  -1   1  -6 1612.17   98.75
   1  -1   6 1736.61  106.39
  -1  -1  -6 1727.87  105.32
   1   1   6 1759.44  108.64
  -1   1  -7   25.18   54.44
   1  -1   7   34.00   60.95
   1   1   7    9.73   50.58
   1  -1   7    0.86   39.05
   1   1   7   17.43   43.88
  -1  -1  -7   -3.50   39.24
  -1   1  -7   -5.50   43.71
   1   1   7   19.54   32.99
  -1   1  -7    4.42   30.48
   1  -1   7   32.30   40.60
  -1  -1  -7   49.64   36.23
   1   1   7   28.51   39.63
  -1   1  -819016.64  590.11
  -1  -1  -819081.17  623.18
   1  -1   818609.82  569.23
   1   1   820258.60  646.23
  -1   1  -820087.78  611.02
  -1  -1  -819796.88  652.25
   1  -1   818877.17  582.02
   1   1   820281.72  844.62
  -1  -1  -819398.96  579.56
   1  -1   818844.14  571.77
   1   1   819620.85  590.53
  -1   1  -819864.44  594.94
   1  -1   818401.29  551.17
   1   1   819471.04  582.63
  -1  -1  -816694.08  522.42
  -1   1  -819841.09  595.58
   1  -1   818267.50  544.19
  -1  -1  -816793.33  503.99
   1   1   816822.01  503.52
  -1   1  -9 2631.49  173.98
  -1  -1  -9 2532.11  181.72
   1  -1   9 2792.18  201.48
   1   1   9 2217.31  151.39
  -1   1  -9 1830.38  121.04
  -1  -1  -9 2230.83  189.81
   1  -1   9 2348.88  151.81
   1   1   9 2266.80  198.94
  -1  -1  -9 2609.52  187.71
   1  -1   9 2623.05  169.27
   1   1   9 2313.36  150.10
  -1   1  -9 2330.77  231.15
   1  -1   9 2417.43  154.56
   1   1   9 2491.61  158.41
  -1   1  -9 2263.81  155.21
  -1  -1  -9 2302.83  178.79
  -1   1  -9 2340.21  149.53
  -1  -1  -9 2347.03  154.43
   1  -1   9 2521.44  160.77
   1   1   9 2154.27  137.90
  -1   1 -10  203.74   58.47
  -1  -1 -10  206.27   49.89
   1  -1  10  197.08   58.31
   1   1  10  156.58   59.81
  -1   1 -10  177.25   41.97
  -1  -1 -10  158.39   52.36
   1  -1  10  212.11   45.08
   1   1  10  139.46   71.00
  -1  -1 -10  200.86   50.08
   1  -1  10  163.44   46.42
   1   1  10  202.57   42.65
  -1   1 -10  107.86   44.28
   1  -1  10  159.73   39.48
   1   1  10  190.58   37.59
  -1   1 -10  172.29   43.39
  -1  -1 -10  186.78   46.25
  -1   1 -10  215.63   43.89
  -1  -1 -10  176.31   40.58
   1  -1  10  228.61   46.88
   1   1  10  242.38   46.31
  -1   1 -11   67.15   52.27
  -1  -1 -11   90.68   46.27
   1  -1  11   25.87   62.84
   1   1  11   60.43   52.32
  -1   1 -11   37.99   43.88
  -1  -1 -11   51.89   47.51
   1  -1  11   77.19   43.16
   1   1  11   68.77   40.62
  -1  -1 -11   23.43   44.07
   1  -1  11   80.60   55.12
   1   1  11   94.46   34.12
   1  -1  11   46.27   40.61
   1   1  11   38.12   31.65
  -1   1 -11   53.98   39.50
  -1  -1 -11   34.36   44.11
  -1   1 -11   95.95   40.35
  -1  -1 -11   56.88   35.81
   1  -1  11   47.35   35.56
   1   1  11   67.27   40.50
  -1   1 -12 3583.45  347.20
  -1  -1 -12 3555.68  345.83
   1  -1  12 3476.17  340.15
   1   1  12 3678.99  368.15
  -1   1 -12 2854.71  274.38
  -1  -1 -12 2930.90  320.22
   1  -1  12 3538.12  344.51
  -1  -1 -12 3542.75  331.02
   1  -1  12 3743.48  349.86
   1   1  12 3788.47  355.02
   1  -1  12 3285.24  305.36
   1   1  12 3579.38  334.04
  -1   1 -12 3547.19  335.56
  -1  -1 -12 3134.70  311.89
  -1   1 -12 3588.49  334.35
  -1  -1 -12 3318.36  310.01
   1  -1  12 3775.20  350.78
   1   1  12 3621.73  336.42
  -1   1 -13  495.58   64.92
  -1  -1 -13  470.69   64.43
   1  -1  13  540.16   67.04
   1   1  13  437.94   65.45
  -1   1 -13  433.37   55.69
  -1  -1 -13  425.17   71.32
   1  -1  13  468.79   59.67
  -1  -1 -13  437.81   55.64
   1  -1  13  387.27   43.33
   1   1  13  431.18   48.97
   1  -1  13  469.22   50.63
   1   1  13  540.56   51.98
  -1   1 -13  456.08   51.53
  -1  -1 -13  385.62   52.59
  -1   1 -13  525.99   56.86
  -1  -1 -13  527.24   55.33
   1  -1  13  454.54   58.28
   1   1  13  486.53   51.17
  -1   1 -14  249.79   65.88
  -1  -1 -14  303.90   64.18
   1  -1  14  282.69   64.80
   1   1  14  235.10   62.09
  -1   1 -14  221.18   45.24
  -1  -1 -14  193.71   62.75
   1  -1  14  222.62   46.80
  -1  -1 -14  242.46   48.39
   1   1  14  274.70   51.94
   1  -1  14  268.15   46.85
   1   1  14  198.27   32.64
  -1   1 -14  291.67   46.20
  -1  -1 -14  223.89   45.16
  -1   1 -14  269.39   44.43
  -1  -1 -14  196.71   47.90
   1  -1  14  222.91   36.24
   1   1  14  293.66   47.26
  -1   1 -15  135.74   52.69
  -1  -1 -15  168.51   56.89
   1  -1  15  169.54   65.67
   1   1  15  227.76   65.67
  -1   1 -15  133.36   53.29
  -1  -1 -15  147.93   42.84
   1  -1  15  188.46   54.08
  -1  -1 -15  170.01   51.19
   1   1  15  166.60   46.22
   1  -1  15  218.49   40.83
   1   1  15  222.38   48.22
  -1   1 -15  168.60   38.45
  -1  -1 -15  148.83   40.89
  -1   1 -15  159.20   41.89
  -1  -1 -15  205.78   47.19
   1  -1  15  197.95   48.04
   1   1  15  184.90   52.15
  -1   1 -16  610.49   75.72
  -1  -1 -16  569.75   73.16
   1  -1  16  725.98   75.86
   1   1  16  675.47   88.00
  -1   1 -16  601.77   71.69
  -1  -1 -16  436.28   71.15
   1  -1  16  548.08   62.41
  -1  -1 -16  524.42   66.92
   1   1  16  606.94   66.13
   1  -1  16  665.34   65.95
   1   1  16  653.72   70.18
  -1   1 -16  641.83   67.48
  -1  -1 -16  494.18   59.04
  -1   1 -16  628.38   64.73
  -1  -1 -16  686.16   70.08
   1  -1  16  734.30   72.39
   1   1  16  714.67   72.17
  -1   1 -17    1.88   54.13
  -1  -1 -17  -50.36   53.87
   1  -1  17   19.20   68.04
   1   1  17  -49.34   64.73
  -1   1 -17   13.56   44.72
  -1  -1 -17    7.30   42.85
   1  -1  17   24.71   48.85
  -1  -1 -17   65.16   55.99
   1   1  17   -9.70   43.35
   1  -1  17    5.86   33.78
   1   1  17  -16.74   41.40
  -1   1 -17  -10.99   36.87
  -1  -1 -17   42.42   42.90
  -1   1 -17    6.73   41.01
  -1  -1 -17  -11.66   40.27
   1  -1  17    8.61   40.88
   1   1  17   -2.64   47.20
  -1   1 -18   31.71   57.21
  -1  -1 -18  -14.82   52.38
   1  -1  18   55.36   60.91
  -1   1 -18   20.22   46.94
  -1  -1 -18   15.95   34.62
   1  -1  18   48.98   38.53
  -1  -1 -18   12.65   52.09
   1   1  18   19.30   36.01
   1  -1  18    5.48   41.36
   1   1  18   61.69   40.25
  -1   1 -18   29.22   41.10
  -1  -1 -18   83.20   43.35
   1  -1  18   35.46   54.52
   1   1  18   47.57   38.24
  -1   1 -19  205.05   64.49
  -1  -1 -19  139.17   62.02
  -1   1 -19  154.63   40.62
  -1  -1 -19  114.56   49.32
   1  -1  19  196.36   52.31
   1   1  19  188.55   46.82
  -1   1 -19  143.07   40.08
  -1  -1 -19  190.53   55.44
  -1   1 -20  579.44   85.47
  -1  -1 -20  552.97   84.11
  -1   1 -20  522.26   96.69
  -1  -1 -20  424.29   51.52
   1  -1  20  491.02   66.74
   1   1  20  640.13   74.19
  -1   1 -20  715.51   84.35
  -1  -1 -20  553.90   72.58
  -1   1 -21  874.04  108.64
  -1  -1 -21  863.32  122.22
  -1   1 -21  963.68  131.20
  -1  -1 -21  808.54   99.88
   1  -1  21 1115.62  123.68
   1   1  21 1046.28  116.17
  -1   1 -21  720.27   79.90
  -1  -1 -21  913.98  113.10
  -1   1 -22  168.16   69.36
  -1  -1 -22  205.32   64.85
  -1   1 -22  216.79   59.36
  -1  -1 -22  188.69   50.71
   1  -1  22  279.62   52.89
   1   1  22  235.90   49.81
  -1   1 -22  197.54   43.46
  -1  -1 -22  283.06   53.47
  -1   1 -23 1622.49  193.07
  -1  -1 -23 1618.12  205.85
  -1   1 -23 1444.69  182.83
  -1  -1 -23 1180.36  165.57
   1  -1  23 1680.84  180.84
   1   1  23 1440.08  157.04
  -1   1 -23 1452.60  166.69
  -1  -1 -23 1210.30  147.39
  -1   1 -24   45.77   82.91
  -1  -1 -24  144.53   71.41
  -1   1 -24   83.44   52.39
  -1  -1 -24   82.74   35.86
   1  -1  24   51.81   52.62
   1   1  24  108.45   44.34
  -1   1 -24   76.44   44.86
  -1  -1 -24   63.16   52.61
  -1   1 -25   37.59   55.02
  -1  -1 -25  -40.64   69.09
  -1   1 -25   20.63   55.98
  -1  -1 -25   27.55   52.72
   1  -1  25  -80.53   42.11
   1   1  25  -21.38   53.68
  -1   1 -25    3.75   50.07
  -1  -1 -25   -4.98   46.95
  -1   1 -26  -20.76   71.40
  -1  -1 -26 -111.46   82.45
  -1   1 -26   37.17   61.60
  -1  -1 -26  -21.58   50.80
   1  -1  26   54.15   50.98
   1   1  26  -14.81   50.75
  -1   1 -26  -28.65   49.36
  -1  -1 -26   42.83   42.88
  -1   1 -27   11.37   74.90
  -1  -1 -27  -40.19   77.95
  -1   1 -27   37.81   56.45
   1  -1  27  -50.51   52.56
   1   1  27  -53.61   59.02
  -1   1 -27  -26.35   55.40
  -1  -1 -27   18.07   49.74
  -1   1 -28    2.64   67.97
  -1  -1 -28   26.08   74.44
  -1   1 -28   44.66   61.79
   1  -1  28  -27.12   55.80
   1   1  28   -8.93   59.82
  -1   1 -28   54.01   60.35
  -1  -1 -28  -25.94   55.41
  -1   1 -29  166.91   76.41
  -1  -1 -29  111.41   87.61
   1  -1  29   38.71   54.13
   1   1  29    6.83   67.61
  -1   1 -29  113.88   58.00
  -1  -1 -29   36.86   62.47
  -1   1 -30   81.37   80.35
  -1  -1 -30   64.45   66.33
   1  -1  30   48.82   66.98
   1   1  30   18.73   61.48
  -1   1 -30   27.09   58.27
  -1  -1 -30   17.40   55.01
   1   2 -30  306.16   91.05
   1  -2 -30  319.65   90.52
   1   2 -30  234.04   48.62
  -1  -2  30  213.21   48.95
  -1   2  30  314.05   71.10
   1   2 -30  297.30   61.41
   1  -2 -30  314.85   70.11
   1   2 -29  133.46   71.35
   1  -2 -29  213.39   82.01
   1   2 -29  197.11   62.30
   1  -2 -29  144.67   58.60
  -1  -2  29  128.28   62.73
  -1   2  29  148.20   62.52
   1   2 -29  194.42   61.50
   1  -2 -29  170.95   68.80
   1   2 -28  -15.75   73.26
   1  -2 -28   16.57   74.29
   1   2 -28  -78.03   61.55
   1  -2 -28  -33.02   57.02
  -1  -2  28  -38.99   41.66
  -1   2  28   54.38   57.47
   1   2 -28   33.47   52.90
   1  -2 -28  -40.02   55.86
   1   2 -27    6.73   69.89
   1  -2 -27   38.94   73.81
   1   2 -27   77.37   52.11
   1  -2 -27   47.89   59.33
  -1  -2  27  -11.30   51.82
  -1   2  27   23.24   58.75
   1   2 -27   -4.68   57.36
   1  -2 -27   -6.07   58.65
   1   2 -26  245.65   85.34
   1  -2 -26  186.97   69.35
   1   2 -26  163.97   61.49
   1  -2 -26  131.97   56.11
  -1  -2  26  239.63   60.66
  -1   2  26  161.32   58.09
   1   2 -26  201.80   49.88
   1  -2 -26  212.27   56.96
   1   2 -25   12.95   71.53
   1  -2 -25   35.80   72.76
   1   2 -25   28.86   52.39
   1  -2 -25    5.27   42.67
  -1  -2  25   27.77   50.29
  -1   2  25  -34.32   55.68
   1   2 -25   13.65   59.53
   1  -2 -25  134.66   55.11
   1   2 -24  356.32   70.31
   1  -2 -24  331.36   75.07
   1   2 -24  424.39   64.19
   1  -2 -24  438.30   65.78
  -1  -2  24  398.93   50.90
  -1   2  24  454.78   62.23
   1   2 -24  405.81   65.46
   1  -2 -24  377.09   58.16
   1   2 -23   -4.90   64.32
   1  -2 -23   86.51   56.66
   1   2 -23   66.89   52.69
   1  -2 -23   19.90   48.53
  -1  -2  23  -38.43   40.51
  -1   2  23   33.43   40.99
   1   2 -23  -40.50   56.70
   1  -2 -23    5.55   54.03
   1   2 -22 1949.24  218.17
   1  -2 -22 1381.28  170.19
   1   2 -22 1747.98  198.42
   1  -2 -22 1289.88  161.99
  -1  -2  22 1623.76  173.27
  -1   2  22 1628.46  179.22
   1   2 -22 1679.58  188.62
   1  -2 -22 1431.39  167.32
   1   2 -21  154.34   66.87
   1  -2 -21  133.19   69.58
   1   2 -21  127.68   56.35
   1  -2 -21   34.97   47.33
   1   2 -21  150.81   55.11
  -1  -2  21  149.70   43.72
  -1   2  21  133.48   40.58
   1   2 -21  161.35   58.89
   1  -2 -21  161.37   48.23
   1   2 -20   89.16   65.06
   1  -2 -20   84.47   57.20
  -1  -2  20  110.52   65.17
   1   2 -20   96.75   54.39
   1  -2 -20  112.68   50.84
   1   2 -20   92.06   48.06
  -1   2  20   78.30   49.91
  -1  -2  20   68.02   42.71
  -1   2  20   70.03   42.73
   1   2 -20  133.40   48.63
   1  -2 -20  106.79   49.39
   1   2 -19   17.63   52.37
   1  -2 -19   -2.12   52.28
  -1  -2  19   53.80   58.39
   1   2 -19   27.10   40.05
   1  -2 -19   33.45   39.58
   1   2 -19   34.13   45.69
  -1   2  19   -4.32   44.94
  -1  -2  19   13.25   43.39
  -1   2  19   34.42   39.50
   1   2 -19   63.88   45.19
   1   2 -19   12.75   41.80
   1  -2 -19   -6.32   37.79
   1   2 -18  624.65   89.12
   1  -2 -18  549.90   96.06
  -1  -2  18  540.05   94.18
  -1   2  18  421.14   69.82
   1   2 -18  537.25   75.88
   1  -2 -18  513.22   80.68
   1   2 -18  451.74   66.25
  -1   2  18  555.32   78.30
  -1  -2  18  566.48   73.81
  -1   2  18  614.92   75.94
   1   2 -18  546.19   75.01
   1   2 -18  522.91   73.63
   1  -2 -18  459.03   67.57
   1   2 -17   -7.02   53.39
   1  -2 -17   45.48   54.32
  -1  -2  17   53.35   48.99
  -1   2  17    8.40   62.89
   1   2 -17   -1.64   41.10
   1  -2 -17    9.42   38.22
   1   2 -17   19.42   41.47
  -1   2  17   15.65   48.24
  -1  -2  17   28.30   43.31
  -1   2  17   39.84   40.62
   1   2 -17   24.66   44.94
   1   2 -17   48.27   45.27
   1  -2 -17   74.57   43.46
  -1   2  17   45.30   39.31
   1   2 -16   78.82   45.96
   1  -2 -16   86.16   52.28
  -1  -2  16   53.68   57.49
  -1   2  16   73.63   68.00
   1   2 -16  101.49   41.51
   1  -2 -16   65.68   42.45
   1   2 -16   76.46   36.35
  -1   2  16   83.15   38.15
  -1  -2  16   53.16   45.69
  -1   2  16   72.16   31.41
   1   2 -16  102.95   42.29
   1   2 -16  138.52   44.54
   1  -2 -16   42.83   38.03
  -1  -2  16   74.34   45.34
  -1   2  16   68.21   47.93
   1   2 -15  -28.84   45.29
   1  -2 -15   -2.16   50.72
  -1  -2  15  -20.00   54.21
  -1   2  15   16.08   65.98
   1   2 -15   21.73   38.01
   1  -2 -15    4.68   35.97
   1   2 -15   -2.95   46.38
  -1   2  15   18.08   40.16
  -1  -2  15   22.73   34.45
  -1   2  15   -2.10   35.42
   1   2 -15   -6.52   43.19
   1   2 -15    7.47   32.96
   1  -2 -15   16.83   40.46
  -1  -2  15  -25.59   42.37
  -1   2  15    3.19   42.70
   1   2 -14 1352.27  136.61
   1  -2 -14 1092.85  124.29
  -1  -2  14 1320.34  155.52
  -1   2  14  982.58  127.38
   1   2 -14 1242.33  120.40
   1  -2 -14 1269.69  134.81
   1   2 -14 1103.22  110.29
  -1   2  14 1160.76  114.69
  -1  -2  14 1217.48  119.56
  -1   2  14  822.61   80.99
   1   2 -14 1237.12  120.99
   1   2 -14 1130.61  113.18
   1  -2 -14 1121.18  110.18
  -1   2  14 1197.93  117.74
   1   2 -13  449.99   62.26
   1  -2 -13  330.84   61.11
  -1  -2  13  478.83   76.52
  -1   2  13  342.26   70.79
   1   2 -13  386.24   50.53
   1  -2 -13  392.69   64.61
  -1  -2  13  395.27   51.92
   1   2 -13  409.25   59.14
  -1   2  13  410.14   52.04
  -1  -2  13  435.90   48.19
  -1   2  13  381.89   45.24
   1   2 -13  340.41   42.97
   1   2 -13  323.50   42.87
   1  -2 -13  455.49   51.69
  -1   2  13  348.45   47.37
   1   2 -12  950.61   97.40
   1  -2 -12  882.42   91.26
  -1  -2  12  930.07  101.07
  -1   2  12  782.31  116.04
   1   2 -12  749.74   81.73
   1  -2 -12  862.30   86.04
  -1  -2  12  873.45   84.33
   1   2 -12  839.57   83.97
  -1   2  12  933.72   87.65
  -1  -2  12  866.04   86.32
  -1   2  12  879.17   83.47
   1   2 -12  895.52   84.62
   1  -2 -12  863.89   81.73
  -1   2  12  736.94   58.50
   1   2 -11  139.11   45.31
   1  -2 -11  206.48   55.75
  -1  -2  11  152.24   57.43
  -1   2  11  108.04   59.84
   1   2 -11   90.88   31.91
  -1  -2  11  145.12   53.51
   1  -2 -11  218.35   49.11
  -1   2  11  149.44   44.17
  -1  -2  11  121.69   41.84
   1   2 -11  120.44   31.80
  -1   2  11  113.63   31.96
   1  -2 -11  143.67   43.58
  -1   2  11  136.25   40.42
   1   2 -10 6001.94  433.24
   1  -2 -10 4459.70  338.36
  -1  -2  10 5491.04  398.43
  -1   2  10 5394.61  427.36
   1   2 -10 5430.76  388.63
  -1  -2  10 5755.33  410.05
  -1   2  10 5686.74  406.69
  -1  -2  10 5295.29  377.81
   1   2 -10 5645.77  401.78
  -1   2  10 5109.85  365.43
   1  -2 -10 4657.66  334.52
  -1   2  10 4871.71  347.46
   1   2  -9  256.24   56.97
   1  -2  -9  219.24   48.35
  -1  -2   9  281.13   61.56
  -1   2   9  190.49   56.53
   1   2  -9  257.22   94.34
  -1  -2   9  229.53   46.11
  -1   2   9  201.63   47.19
  -1  -2   9  192.13   34.36
   1   2  -9  193.73   40.59
  -1   2   9  232.54   43.27
   1  -2  -9  232.49   39.84
  -1   2   9  211.96   44.35
   1   2  -8  171.41   59.54
   1  -2  -8   97.47   47.31
  -1  -2   8  179.90   60.28
  -1   2   8  144.80   56.08
   1   2  -8  103.30   43.62
  -1  -2   8   71.90   51.03
  -1   2   8  150.30   47.13
  -1  -2   8  182.36   42.09
   1   2  -8  170.58   47.17
  -1   2   8  155.25   38.23
   1  -2  -8  128.68   38.55
  -1   2   8  201.26   54.78
   1   2  -7  133.87   51.23
   1  -2  -7  120.03   54.90
  -1  -2   7  128.18   60.03
  -1   2   7  111.77   51.21
   1   2  -7   87.89   33.04
  -1  -2   7   77.13   48.66
  -1   2   7   81.20   41.71
  -1  -2   7   65.99   28.98
   1   2  -7   93.95   42.92
  -1   2   7   89.81   32.74
  -1  -2   7   83.62   44.04
  -1   2   7   56.48   36.79
   1   2  -6  450.97   61.76
  -1  -2   6  480.47   66.00
   1  -2  -6  417.35   68.61
  -1   2   6  377.99   58.35
   1   2  -6  338.89   43.30
  -1   2   6  322.70   45.87
  -1  -2   6  375.60   47.51
   1   2  -6  370.10   47.93
  -1   2   6  352.36   43.02
  -1  -2   6  371.85   52.83
  -1   2   6  378.77   52.18
   1  -2  -510060.46  337.14
  -1   2   510638.54  412.85
  -1   2   5 9996.33  322.88
  -1  -2   5 9498.44  303.20
   1   2  -5 9119.92  290.27
  -1  -2   510091.55  319.88
   1  -2  -510006.50  324.07
  -1   2   510113.72  323.91
   1   2  -4 1167.78  100.33
  -1   2   4 1482.00  110.87
   1  -2  -4 1318.19   95.12
  -1   2   4 1272.04  112.50
  -1  -2   4 1277.61   87.60
   1   2  -4  985.61   69.62
   1   2  -4 1208.49   84.63
  -1  -2   4 1386.98   95.18
   1  -2  -4 1278.92   89.24
  -1   2   4 1187.41   80.26
   1   2  -3  191.39   64.98
  -1   2   3  145.71   54.01
  -1  -2   3  104.21   90.34
   1  -2  -3  122.62   63.50
   1   2  -3  140.40   47.94
   1   2  -3  186.04   44.63
  -1  -2   3  184.96   47.82
   1  -2  -3  130.70   36.84
   1  -2  -2 4038.61  242.73
  -1  -2   2 4776.48  174.67
  -1  -2   2 4723.15  173.81
   1   2  -2 4543.33  166.51
   1   2  -2 5224.81  190.42
  -1  -2   2 5044.38  185.09
  -1  -2   1  189.05   64.63
  -1  -2   1  183.00   48.70
  -1  -2   1  164.94   43.67
  -1  -2   1  125.71   55.17
  -1  -2   0 1043.23  106.38
  -1  -2   0 1012.33   84.67
   1  -2   1 1286.35   97.55
  -1  -2  -1 1695.88  150.80
  -1   2  -1 1568.60  103.69
  -1  -2  -1 1455.31   97.97
  -1   2  -1 1351.74   88.80
   1  -2   2  679.27   70.02
  -1  -2  -2  886.73   86.20
   1   2   2  818.12   84.85
  -1   2  -2  683.00   58.60
   1  -2   2  584.53   58.20
  -1  -2  -2  795.83   68.15
  -1   2  -2  606.82   62.05
  -1  -2  -2  578.04   57.99
   1  -2   2  595.72   56.50
  -1   2  -2  739.13   59.28
  -1   2  -3  170.39   52.27
   1  -2   3  145.55   51.49
  -1  -2  -3  181.88   57.25
  -1   2  -3  112.46   36.04
   1  -2   3  181.45   49.89
  -1  -2  -3  155.02   48.24
  -1   2  -3  156.69   46.08
   1  -2   3  165.53   47.90
  -1   2  -413451.99  432.69
   1  -2   415333.00  483.86
  -1  -2  -411642.40  378.57
  -1   2  -414861.58  459.23
   1  -2   413446.68  412.22
  -1  -2  -413707.02  556.60
  -1  -2  -413602.86  417.75
  -1   2  -411700.88  367.17
  -1   2  -413841.17  424.65
   1  -2   414404.76  441.06
  -1  -2  -413321.87  408.96
  -1   2  -5   87.72   43.54
   1  -2   5   68.85   57.36
  -1   2  -5   95.52   37.03
   1  -2   5  117.82   45.84
  -1  -2  -5   95.51   59.60
   1   2   5  165.56   45.54
  -1  -2  -5   98.75   46.36
   1  -2   5  111.34   45.92
  -1   2  -5   96.77   36.79
   1  -2   5   84.89   41.05
  -1  -2  -5  104.88   36.84
  -1   2  -6 2302.33  151.34
   1  -2   6 2999.36  196.52
  -1   2  -6 2527.53  158.98
   1  -2   6 2693.86  168.99
  -1  -2  -6 2891.70  200.09
   1   2   6 2754.81  173.90
  -1  -2  -6 2710.22  169.82
   1  -2   6 2926.98  185.62
  -1   2  -6 2624.82  166.03
   1   2   6 2486.69  160.41
   1   2   6 2487.11  157.73
  -1   2  -6 2836.57  176.93
   1  -2   6 2969.14  183.14
  -1  -2  -6 2576.20  160.06
  -1   2  -7  724.76   72.91
   1  -2   7  759.82   71.87
  -1   2  -7  763.13   60.54
   1  -2   7  774.05   60.30
  -1  -2  -7  606.58   65.09
  -1  -2  -7  773.92   62.77
   1  -2   7  916.84   77.70
  -1   2  -7  686.55   55.44
   1   2   7  770.02   58.66
   1   2   7  708.14   56.19
  -1   2  -7  796.55   54.82
   1  -2   7  697.09   51.35
  -1  -2  -7  590.01   42.12
  -1   2  -8 1458.04  106.86
   1  -2   8 1593.34  109.36
   1   2   8 1172.81  120.56
  -1   2  -8 1559.74  123.35
   1  -2   8 1542.19  102.87
  -1  -2  -8 1177.95  132.45
  -1  -2  -8 1115.40   77.41
   1  -2   8 1242.06   83.81
  -1   2  -8 1379.83   91.47
   1   2   8 1605.51  105.18
   1  -2   8 1304.58   87.29
   1   2   8 1467.75   94.81
  -1   2  -8 1433.46   92.23
   1  -2   8 1531.35   99.09
  -1  -2  -8 1523.05   98.04
  -1   2  -9 2577.70  176.23
   1  -2   9 2477.09  167.48
   1   2   9 2142.73  155.95
  -1   2  -9 2256.07  154.50
   1  -2   9 2422.60  155.93
  -1  -2  -9 1766.19  156.71
  -1  -2  -9 2362.48  155.91
  -1   2  -9 2157.61  142.49
   1   2   9 2342.16  157.30
   1  -2   9 2236.77  144.68
  -1   2  -9 1831.12  129.07
   1   2   9 2224.55  143.88
  -1   2  -9 2339.88  149.69
   1  -2   9 2471.98  158.13
  -1  -2  -9 2186.64  141.91
  -1   2 -10 4028.94  295.68
  -1  -2 -10 3938.84  294.29
   1  -2  10 4828.84  356.64
   1   2  10 4231.38  317.59
  -1   2 -10 4871.20  357.71
  -1  -2 -10 3809.32  327.85
   1  -2  10 4835.09  348.88
  -1  -2 -10 4497.37  323.92
  -1   2 -10 4504.90  324.16
   1   2  10 4562.42  328.78
   1   2  10 4720.94  341.19
   1  -2  10 4752.67  341.72
  -1   2 -10 3799.05  272.61
   1   2  10 4725.59  339.38
  -1   2 -10 4363.98  312.96
   1  -2  10 4842.89  346.99
  -1  -2 -10 4695.77  340.58
   1   2  10 4063.90  290.76
  -1   2 -11  -18.70   53.87
  -1  -2 -11   12.36   45.52
   1  -2  11   38.47   45.15
   1   2  11   -7.48   55.57
  -1  -2 -11   10.54   36.85
   1  -2  11    0.84   47.40
  -1  -2 -11   14.80   49.00
  -1   2 -11   -6.01   37.32
   1   2  11   38.30   37.25
   1   2  11  -19.75   67.69
   1  -2  11    4.02   44.36
  -1   2 -11   28.43   45.68
   1   2  11   -8.30   32.22
  -1   2 -11   13.78   36.15
   1  -2  11    2.71   42.71
  -1  -2 -11   12.54   37.85
   1   2  11  -10.21   34.89
  -1   2 -12  733.21   69.72
  -1  -2 -12  682.45   70.32
   1  -2  12  674.65   79.15
   1   2  12  508.92   80.90
  -1   2 -12  556.10   54.53
  -1  -2 -12  414.95   71.86
   1  -2  12  608.92   58.04
  -1  -2 -12  627.60   63.56
   1   2  12  480.45   50.38
  -1   2 -12  524.23   54.84
   1   2  12  571.45   57.78
   1  -2  12  524.71   51.63
  -1   2 -12  569.92   54.70
   1   2  12  614.61   51.59
  -1   2 -12  503.24   47.69
  -1  -2 -12  582.40   61.14
   1  -2  12  596.19   52.26
   1   2  12  462.37   42.34
  -1   2 -13  -43.88   48.26
  -1  -2 -13    1.11   43.06
   1  -2  13   12.60   68.46
   1   2  13   28.90   68.02
  -1  -2 -13    9.13   34.23
   1  -2  13  -23.73   45.89
  -1  -2 -13  -43.21   49.11
   1   2  13   -5.46   31.59
  -1   2 -13  -29.08   49.72
   1   2  13    8.34   42.90
   1  -2  13    3.41   33.45
   1   2  13   29.92   39.83
  -1   2 -13   22.95   40.88
  -1   2 -13   -0.08   40.07
  -1  -2 -13   19.33   35.84
   1  -2  13  -11.80   38.63
   1   2  13   -9.76   31.97
  -1   2 -14 3264.34  300.61
  -1  -2 -14 3054.87  334.46
   1  -2  14 3385.67  311.94
   1   2  14 3030.91  321.60
  -1   2 -14 3531.01  321.28
  -1  -2 -14 2294.73  248.86
   1  -2  14 3412.66  316.92
  -1  -2 -14 3025.77  272.72
   1   2  14 3046.62  273.75
  -1   2 -14 3274.93  293.29
   1   2  14 3199.05  286.95
   1  -2  14 3192.40  284.59
   1   2  14 2543.74  226.49
  -1   2 -14 3096.22  277.60
  -1   2 -14 3403.74  304.18
  -1  -2 -14 2931.37  273.29
   1  -2  14 3441.48  308.05
   1   2  14 2550.50  227.07
  -1   2 -15  278.45   55.58
  -1  -2 -15  310.83   70.44
   1  -2  15  320.50   65.41
   1   2  15  265.95   73.76
  -1   2 -15  323.21   56.59
  -1  -2 -15  259.89   64.20
   1  -2  15  310.79   49.07
  -1  -2 -15  310.73   43.68
   1   2  15  269.45   45.77
  -1   2 -15  277.89   55.32
   1   2  15  343.82   49.86
   1  -2  15  442.89   46.67
   1   2  15  357.72   47.89
  -1   2 -15  309.48   51.50
  -1   2 -15  316.83   48.05
  -1  -2 -15  345.64   43.23
   1  -2  15  376.46   52.76
  -1   2 -16  465.90   71.34
  -1  -2 -16  444.92   81.09
   1  -2  16  536.91   71.63
   1   2  16  342.90   67.43
  -1   2 -16  452.29   70.46
  -1  -2 -16  399.56   68.68
   1  -2  16  599.85   70.89
  -1  -2 -16  386.93   60.22
   1   2  16  458.03   60.53
   1   2  16  414.63   55.45
   1  -2  16  490.21   59.92
   1   2  16  461.21   59.75
  -1   2 -16  533.86   58.13
  -1   2 -16  432.34   54.47
  -1  -2 -16  408.20   52.77
   1  -2  16  568.62   66.32
  -1   2 -17  386.87   59.38
  -1  -2 -17  320.90   58.45
   1  -2  17  398.44   69.49
   1   2  17  341.38   71.18
  -1   2 -17  354.97   68.56
  -1  -2 -17  260.70   54.52
   1  -2  17  405.24   72.20
  -1  -2 -17  308.19   52.93
   1   2  17  296.15   52.42
   1   2  17  317.01   56.05
   1  -2  17  447.22   55.33
   1   2  17  260.99   33.33
  -1   2 -17  388.25   55.12
  -1   2 -17  372.32   51.85
  -1  -2 -17  336.19   48.24
   1  -2  17  273.61   45.18
  -1   2 -18  634.23   91.78
  -1  -2 -18  491.06   87.00
   1  -2  18  695.23   98.85
  -1   2 -18  489.18   76.70
  -1  -2 -18  364.34   60.76
   1  -2  18  580.17   87.75
   1   2  18  424.38   51.16
   1  -2  18  659.58   81.09
   1   2  18  553.47   73.61
  -1   2 -18  518.57   66.83
  -1  -2 -18  563.01   77.05
  -1   2 -19   43.48   70.55
  -1  -2 -19   45.27   50.42
   1  -2  19   82.08   63.71
  -1   2 -19   29.50   41.04
  -1  -2 -19   14.57   45.53
   1  -2  19   50.14   45.43
   1   2  19   22.25   48.82
   1  -2  19  110.76   51.24
   1   2  19   27.20   45.27
  -1   2 -19   38.34   42.90
  -1  -2 -19    6.44   48.07
  -1   2 -20   64.93   63.21
  -1  -2 -20  -16.74   65.40
  -1   2 -20   15.71   43.43
  -1  -2 -20   15.34   43.90
   1  -2  20  -48.56   55.51
   1   2  20   -4.82   43.49
   1  -2  20   20.71   49.88
   1   2  20    2.32   40.18
  -1   2 -20   45.88   44.06
  -1  -2 -20    0.41   40.09
  -1   2 -21  863.21  104.10
  -1  -2 -21 1074.42  146.83
  -1   2 -21  884.65  112.71
  -1  -2 -21  737.34   99.46
   1  -2  21 1102.73  123.22
   1  -2  21 1152.76  128.38
   1   2  21 1071.66  124.07
  -1   2 -21  962.34  109.45
  -1  -2 -21 1093.39  126.21
  -1   2 -22  922.56  124.33
  -1  -2 -22  890.65  133.32
  -1   2 -22  817.67  117.84
  -1  -2 -22  607.31   80.73
   1  -2  22  910.76  105.81
   1   2  22  827.00   99.77
  -1   2 -22  811.71   98.63
  -1  -2 -22  743.16  109.69
  -1   2 -23  162.32   62.54
  -1  -2 -23  156.99   63.85
  -1   2 -23  119.75   56.56
  -1  -2 -23  120.53   61.21
   1  -2  23   84.65   42.86
   1   2  23  148.80   54.17
  -1   2 -23  157.00   45.20
  -1  -2 -23  136.95   49.82
  -1   2 -24  302.05   70.33
  -1  -2 -24  219.66   63.49
  -1   2 -24  273.27   62.57
  -1  -2 -24  212.79   49.08
   1  -2  24  352.49   54.23
   1   2  24  191.28   57.94
  -1   2 -24  212.34   60.62
  -1  -2 -24  250.77   53.94
  -1   2 -25   94.73   76.46
  -1  -2 -25   85.86   71.64
  -1   2 -25   72.00   64.12
  -1  -2 -25   63.05   37.04
   1  -2  25  116.62   54.44
   1   2  25   92.89   46.32
  -1   2 -25  108.11   53.18
  -1  -2 -25   56.95   48.47
  -1   2 -26  158.89   67.41
  -1  -2 -26  175.59   75.01
  -1   2 -26  120.32   55.66
  -1  -2 -26  132.44   60.55
   1  -2  26  122.82   54.96
   1   2  26  122.48   58.23
  -1   2 -26  189.67   51.53
  -1  -2 -26  108.22   53.93
  -1   2 -27   76.74   80.85
  -1  -2 -27   42.77   73.24
  -1   2 -27  -26.65   53.95
   1  -2  27    7.50   59.91
   1   2  27   11.67   48.61
  -1   2 -27   67.69   67.11
  -1  -2 -27   56.05   60.96
  -1   2 -28    5.62   77.16
  -1  -2 -28    5.98   78.15
  -1   2 -28   25.97   62.66
   1  -2  28   22.64   61.34
   1   2  28   -8.51   61.15
  -1   2 -28  -38.27   62.18
  -1  -2 -28    9.75   64.46
  -1   2 -29    1.79   82.31
  -1  -2 -29  -12.96   67.98
   1  -2  29   35.98   52.55
   1   2  29   22.18   60.02
  -1   2 -29   46.45   58.50
  -1  -2 -29  -39.87   62.02
  -1   2 -30  299.06   78.04
  -1  -2 -30  299.18   79.39
   1  -2  30  190.64   56.00
   1   2  30  183.86   56.07
  -1   2 -30  256.97   57.28
  -1  -2 -30  175.11   56.27
   1  -3 -30   11.35   82.83
   1   3 -30   52.06   71.85
  -1  -3  30   81.56   50.82
  -1   3  30  -80.79   56.17
   1   3 -30  -49.59   65.30
   1  -3 -30  126.40   69.17
   1   3 -29  315.31   80.23
   1  -3 -29  195.68   91.72
   1   3 -29  162.49   49.96
  -1  -3  29  248.02   66.14
  -1   3  29  215.58   65.27
   1   3 -29  271.69   61.91
   1  -3 -29  133.24   68.19
   1   3 -28    7.25   59.34
   1  -3 -28   62.02   82.43
   1   3 -28  -90.54   60.67
   1  -3 -28  -14.21   62.75
  -1  -3  28  -20.64   58.01
  -1   3  28  -11.78   56.72
   1   3 -28  -88.18   50.89
   1  -3 -28   83.42   66.13
   1   3 -27   43.79   73.61
   1  -3 -27   36.26   75.83
   1   3 -27   23.94   51.83
   1  -3 -27   14.99   64.08
  -1  -3  27   40.05   48.37
  -1   3  27   50.11   63.25
   1   3 -27   36.07   54.62
   1  -3 -27    1.50   61.07
   1   3 -26  -25.21   71.72
   1  -3 -26  -17.48   72.39
   1   3 -26   -3.34   58.74
   1  -3 -26   67.49   46.53
  -1  -3  26   20.42   45.04
  -1   3  26   -5.99   58.27
   1   3 -26  -50.67   43.47
   1  -3 -26   62.13   53.33
   1   3 -25  412.96   69.80
   1  -3 -25  287.77   78.20
   1   3 -25  369.73   55.16
   1  -3 -25  232.64   55.66
  -1  -3  25  417.99   57.72
  -1   3  25  248.38   52.00
   1   3 -25  407.59   53.36
   1  -3 -25  378.43   58.52
   1   3 -24  212.49   62.73
   1  -3 -24  190.30   61.34
   1   3 -24  219.44   54.18
   1  -3 -24  170.04   55.61
  -1  -3  24  229.75   52.03
  -1   3  24  158.94   53.36
   1   3 -24  147.59   52.54
   1  -3 -24  230.23   60.45
   1   3 -23  911.80  128.19
   1  -3 -23  722.14  103.39
   1   3 -23  654.89   76.54
   1  -3 -23  606.64   76.13
  -1  -3  23  681.92   70.68
  -1   3  23  722.30   84.09
   1   3 -23  811.58  112.17
   1  -3 -23  680.89   79.06
   1   3 -22   71.48   65.16
   1  -3 -22  -35.90   57.63
   1   3 -22   -2.85   49.86
   1  -3 -22  -11.95   59.68
   1   3 -22   40.80   50.79
  -1  -3  22   43.11   43.75
  -1   3  22   57.10   45.05
   1   3 -22   31.77   38.93
   1  -3 -22   25.90   43.28
   1   3 -21  425.66   62.46
   1  -3 -21  339.79   71.53
  -1  -3  21  326.33   84.66
   1   3 -21  458.64   76.19
   1  -3 -21  436.57   68.31
   1   3 -21  484.23   71.24
  -1  -3  21  581.50   71.84
  -1   3  21  460.97   65.55
   1   3 -21  401.10   51.35
   1  -3 -21  379.79   58.23
   1   3 -20   69.72   57.87
   1  -3 -20   75.14   62.00
  -1  -3  20   17.35   65.30
   1   3 -20   40.66   45.80
   1  -3 -20   48.16   45.12
   1   3 -20   39.59   50.95
  -1   3  20   60.64   57.87
  -1  -3  20    9.70   46.42
  -1   3  20   63.92   44.32
   1   3 -20   44.14   39.61
   1  -3 -20   57.21   44.51
   1   3 -19  126.39   55.44
   1  -3 -19   57.00   53.20
  -1  -3  19   96.57   66.17
   1   3 -19   43.32   51.72
   1  -3 -19   64.52   45.17
   1   3 -19   35.07   46.81
  -1   3  19   44.88   46.65
  -1  -3  19  105.25   54.24
  -1   3  19   66.78   37.92
   1   3 -19  106.56   43.91
   1   3 -19   49.17   40.46
   1  -3 -19   53.12   51.93
   1   3 -18  618.00   84.77
   1  -3 -18  695.24  101.70
  -1  -3  18  585.15   97.30
   1   3 -18  698.08   92.45
   1  -3 -18  596.02   86.00
   1   3 -18  530.17   73.58
  -1   3  18  540.18   73.66
  -1  -3  18  736.37   86.08
  -1   3  18  518.99   68.61
   1   3 -18  574.43   77.77
   1   3 -18  651.18   81.43
   1  -3 -18  535.44   71.62
   1   3 -17  144.53   56.56
   1  -3 -17  177.61   62.00
  -1  -3  17  251.61   67.94
  -1   3  17  155.06   61.10
   1   3 -17  233.54   54.96
   1  -3 -17  152.11   43.17
   1   3 -17  177.74   46.45
  -1   3  17  184.39   43.73
  -1  -3  17  159.62   46.44
  -1   3  17  157.96   44.28
   1   3 -17  219.58   44.58
   1   3 -17  187.16   50.22
   1  -3 -17  209.16   45.10
  -1   3  17  111.83   46.17
   1   3 -16  363.01   66.79
   1  -3 -16  250.55   63.79
  -1  -3  16  319.44   64.93
  -1   3  16  275.93   69.84
   1   3 -16  215.82   45.33
   1  -3 -16  260.61   58.20
  -1  -3  16  269.90   46.47
   1   3 -16  275.06   48.74
  -1   3  16  243.26   44.91
  -1  -3  16  313.90   51.75
  -1   3  16  301.94   50.54
   1   3 -16  255.05   47.10
   1   3 -16  299.62   52.69
   1  -3 -16  309.65   52.84
  -1  -3  16  219.02   38.24
  -1   3  16  231.64   42.66
   1   3 -15  565.71   76.38
   1  -3 -15  451.73   69.48
  -1  -3  15  632.01   83.24
  -1   3  15  462.29   92.60
   1   3 -15  514.52   51.99
   1  -3 -15  475.24   58.07
  -1  -3  15  617.30   75.19
   1   3 -15  562.49   68.14
  -1   3  15  496.03   52.34
  -1  -3  15  563.58   68.71
  -1   3  15  608.98   70.46
   1   3 -15  550.38   68.80
   1   3 -15  526.78   64.38
   1  -3 -15  452.11   49.24
  -1   3  15  425.41   53.44
   1   3 -14   60.23   50.13
   1  -3 -14   62.65   50.19
  -1  -3  14   51.17   52.35
  -1   3  14  110.83   66.85
   1   3 -14   45.94   44.57
   1  -3 -14   69.66   39.98
  -1  -3  14   63.59   58.89
   1   3 -14   91.24   42.14
  -1   3  14    4.37   45.44
  -1  -3  14   86.45   45.10
   1   3 -14   50.44   40.45
  -1   3  14   39.04   29.00
   1  -3 -14   37.42   27.75
  -1   3  14   81.84   44.58
   1   3 -13  147.65   52.66
   1  -3 -13  123.01   59.20
  -1  -3  13  125.41   55.78
  -1   3  13   91.66   55.60
   1   3 -13   72.07   35.52
  -1  -3  13   91.11   41.41
   1  -3 -13  121.69   42.63
   1   3 -13  137.72   46.20
  -1   3  13  129.15   48.11
  -1  -3  13  131.11   41.81
   1   3 -13  157.66   44.60
  -1   3  13  110.24   41.08
   1  -3 -13  100.77   39.49
  -1   3  13   87.32   42.12
   1   3 -12 1858.90  189.11
   1  -3 -12 1368.57  157.60
  -1  -3  12 1913.56  197.24
  -1   3  12 1269.34  139.08
   1   3 -12 1731.94  138.15
  -1  -3  12 1879.06  186.92
  -1   3  12 1720.15  139.33
  -1  -3  12 1329.16  107.03
   1   3 -12 1696.45  135.39
  -1   3  12 1639.04  131.71
   1  -3 -12 1362.36  114.09
  -1   3  12 1712.28  140.50
   1   3 -11 1079.41  108.37
   1  -3 -11  791.27   80.15
  -1  -3  11 1082.24  104.16
  -1   3  11  928.10  106.28
   1   3 -11 1107.76  121.07
  -1  -3  11 1239.78  114.11
  -1   3  11  683.85  112.03
  -1   3  11  965.48   62.62
  -1  -3  11 1020.78   92.69
   1   3 -11 1000.50   92.91
  -1   3  11 1018.81   91.78
   1  -3 -11  868.03   64.58
  -1   3  11 1012.16   94.39
   1   3 -10   31.06   45.92
   1  -3 -10   23.05   47.32
  -1  -3  10   78.38   53.77
  -1   3  10    0.21   50.99
   1   3 -10   60.84   36.19
  -1  -3  10   45.82   64.96
  -1   3  10   62.38   40.87
  -1   3  10   68.05   47.65
  -1  -3  10   27.30   31.00
   1   3 -10   38.69   37.52
  -1   3  10   62.67   30.84
   1  -3 -10   53.20   39.07
  -1   3  10   32.56   45.21
   1   3  -9 5523.73  396.64
   1  -3  -9 5847.91  450.46
  -1  -3   9 6797.82  486.92
  -1   3   9 5073.10  394.85
   1   3  -9 6374.15  452.95
  -1  -3   9 6877.99  485.80
  -1   3   9 5027.37  387.89
  -1   3   9 5104.10  364.04
  -1  -3   9 6338.51  449.13
   1   3  -9 5253.82  372.35
  -1   3   9 5244.92  371.62
  -1  -3   9 4936.72  352.40
   1  -3  -9 6342.08  452.96
  -1   3   9 5362.17  380.31
   1   3  -8 3220.94  201.31
  -1  -3   8 3635.74  228.16
   1  -3  -8 3361.23  257.36
  -1   3   8 3201.63  222.11
   1   3  -8 3315.94  201.44
  -1  -3   8 3400.40  208.89
  -1   3   8 2892.18  327.44
  -1   3   8 3317.02  203.19
  -1  -3   8 3212.37  195.80
   1   3  -8 3490.30  210.94
  -1   3   8 3520.07  213.16
  -1  -3   8 3348.62  202.90
   1  -3  -8 2611.96  159.18
  -1   3   8 3311.30  202.34
   1   3  -7  502.40   54.80
  -1  -3   7  574.46   64.18
   1  -3  -7  485.78   58.15
  -1   3   7  475.44   70.83
   1   3  -7  461.88   49.02
  -1   3   7  465.14   55.77
  -1  -3   7  479.20   45.86
   1   3  -7  501.68   53.84
  -1   3   7  396.92   39.02
  -1  -3   7  590.97   53.26
  -1   3   7  500.31   57.31
   1   3  -6  996.56   86.54
  -1   3   6  699.34   62.10
   1  -3  -6  903.00   72.59
  -1   3   6  893.70   72.64
  -1  -3   6  960.44   74.05
   1   3  -6  973.60   78.65
  -1  -3   6  906.69   74.41
   1  -3  -6  931.69   74.57
  -1   3   6  831.54   67.87
   1   3  -5 1591.20  130.97
  -1   3   5 1225.10  112.46
   1  -3  -5 1170.65   80.79
  -1   3   5 1157.81   80.90
  -1  -3   5 1242.89   84.12
   1   3  -5 1037.13   71.33
   1   3  -5 1166.31   80.10
  -1  -3   5 1316.48   89.79
   1  -3  -5 1245.80   85.96
  -1   3   5 1168.37   82.39
   1   3  -4 1488.08  149.43
  -1  -3   4 1173.67   88.13
   1  -3  -4 1221.30   88.61
  -1   3   4 1213.19   85.59
  -1  -3   4 1247.22   84.61
   1   3  -4 1364.38   91.02
   1   3  -4 1355.56   91.49
  -1  -3   4 1379.85   95.57
   1  -3  -4 1081.67   79.48
   1  -3  -3  177.82   47.90
  -1  -3   3  192.41   45.92
   1  -3  -3  159.63   41.03
  -1  -3   3  203.80   43.37
   1   3  -3  195.63   48.83
   1   3  -3  218.92   43.81
  -1  -3   3  209.84   41.50
  -1  -3   2 2905.18  285.25
   1  -3  -2 3097.34  190.62
   1   3  -2 3443.35  208.69
  -1  -3   2 3589.86  218.77
   1  -3  -2 3327.24  201.49
  -1   3   2 3282.60  199.21
  -1  -3   2 3137.26  189.68
   1   3  -2 3277.82  198.52
   1   3  -2 2408.18  145.44
  -1  -3   2 2886.73  174.43
   1   3  -1 6674.20  353.32
   1  -3  -1 5766.08  212.55
   1  -3  -1 5395.51  193.18
  -1  -3   1 5350.61  187.01
   1  -3  -1 4797.07  164.98
  -1   3   1 5578.77  193.46
  -1  -3   0  112.08   91.78
   1   3   0   72.79   99.26
   1  -3   0   64.76   38.25
  -1  -3   0   63.11   37.93
   1  -3   0   54.69   71.17
  -1  -3   0   63.44   37.07
   1  -3   1 4900.41  195.93
  -1  -3  -1 4938.14  188.90
   1   3   1 5629.67  230.15
   1  -3   1 5121.24  190.63
   1   3   1 5172.48  286.61
  -1   3  -1 5301.33  191.09
   1  -3   1 4895.65  176.45
   1  -3   1 4840.56  176.03
  -1   3  -1 4894.96  176.59
  -1  -3  -1 4679.17  170.52
   1   3   1 5033.35  181.61
  -1   3  -2  931.73   83.03
   1  -3   2 1014.36   90.31
  -1  -3  -2 1202.91   97.81
   1   3   2 1163.60   99.77
  -1   3  -2  974.46   78.80
   1   3   2 1104.17   97.13
  -1   3  -2 1144.20   81.06
   1  -3   2  931.97   72.41
  -1   3  -2 1115.63   84.48
   1   3   2  967.07   71.93
  -1   3  -3  737.62   76.19
   1  -3   3  648.65   69.29
  -1  -3  -3  680.56   69.33
   1   3   3  648.45   74.68
   1   3   3  572.27   58.53
  -1   3  -3  647.78   60.18
   1  -3   3  500.87   57.44
  -1   3  -3  570.08   56.41
   1   3   3  555.48   48.55
  -1   3  -4 4974.27  193.58
   1  -3   4 5600.06  220.78
  -1  -3  -4 5372.96  219.01
   1   3   4 5141.90  297.89
  -1   3  -4 4774.08  173.29
   1  -3   4 5786.64  208.74
  -1  -3  -4 4521.46  174.23
  -1   3  -4 4522.57  165.13
   1  -3   4 5235.75  187.43
  -1   3  -5 6468.47  245.64
   1  -3   5 6484.58  238.67
  -1  -3  -5 6243.47  286.70
   1  -3   5 5811.40  202.01
  -1  -3  -5 5098.51  188.78
  -1   3  -5 6300.52  220.01
   1  -3   5 6118.57  211.52
  -1   3  -6 1452.89  111.10
   1  -3   6 1388.76  103.53
  -1  -3  -6 1119.92  120.90
  -1   3  -6 1315.46   91.08
   1  -3   6 1418.69   95.56
   1   3   6 1064.10   80.43
  -1  -3  -6  933.13   64.47
  -1   3  -6 1006.01   79.75
   1   3   6 1342.04   95.19
  -1   3  -6 1423.47   93.53
   1  -3   6 1275.81   86.84
  -1  -3  -6 1359.10   90.15
  -1   3  -7  689.66   58.80
   1  -3   7  853.91   79.08
  -1   3  -7  860.62   68.97
   1  -3   7  850.87   74.12
  -1  -3  -7  728.72   56.50
   1   3   7  836.82   68.27
  -1  -3  -7  779.81   63.82
  -1   3  -7  863.50   72.58
   1   3   7  769.10   55.84
   1   3   7  664.50   45.11
  -1   3  -7  778.48   54.07
   1  -3   7  696.42   51.47
  -1  -3  -7  753.17   53.69
  -1   3  -8 1619.26  107.50
   1  -3   8 1764.40  115.62
  -1   3  -8 1741.75  107.91
   1  -3   8 1833.21  126.24
  -1  -3  -8 1490.38  168.86
  -1  -3  -8 1560.35   97.88
  -1   3  -8 1668.43  104.50
   1   3   8 1574.68  101.34
   1  -3   8 1535.00   99.34
   1   3   8 1668.05  103.04
  -1   3  -8 1825.37  124.10
   1  -3   8 1884.27  130.66
  -1  -3  -8 1829.39  125.00
  -1   3  -9 1082.40   97.60
   1  -3   9 1512.53  138.62
  -1   3  -9 1310.82  111.27
   1  -3   9 1437.41  122.37
  -1  -3  -9 1030.65  133.06
  -1  -3  -9 1336.95  117.51
  -1   3  -9 1283.65  112.27
   1   3   9 1342.24  119.09
   1  -3   9 1237.59  104.91
   1   3   9 1235.98  102.77
  -1   3  -9 1343.62  111.97
   1  -3   9 1322.40  112.69
  -1  -3  -9 1394.30  122.63
  -1   3 -10  980.53   71.84
   1  -3  10  958.60   74.65
   1   3  10  828.96  113.86
  -1   3 -10 1001.27  169.12
   1  -3  10 1030.18   95.28
  -1  -3 -10  696.22  100.58
  -1  -3 -10  837.47   73.43
  -1   3 -10  880.23   71.48
   1   3  10 1013.67   98.69
   1  -3  10  918.48   77.95
  -1   3 -10  911.90   70.35
   1   3  10  773.51   60.22
  -1   3 -10  900.42   66.04
   1  -3  10  978.05   64.40
  -1  -3 -10  958.03   62.72
  -1   3 -11 5314.97  388.51
   1  -3  11 5337.35  392.38
   1   3  11 4400.05  348.34
  -1   3 -11 5582.16  404.55
   1  -3  11 4828.02  347.19
  -1  -3 -11 3929.15  344.81
  -1  -3 -11 4494.32  341.38
  -1   3 -11 4333.33  311.82
   1   3  11 4660.50  335.82
   1  -3  11 4708.66  337.69
  -1   3 -11 4875.91  350.69
   1   3  11 4600.55  330.56
  -1   3 -11 5194.55  372.31
   1  -3  11 5218.13  373.53
  -1  -3 -11 4966.27  357.82
  -1   3 -12 3439.13  327.02
  -1  -3 -12 2255.02  255.01
   1  -3  12 3614.58  342.76
   1   3  12 2784.63  298.82
  -1   3 -12 3147.68  297.37
   1  -3  12 3184.87  297.82
  -1  -3 -12 2068.23  234.66
  -1  -3 -12 2807.89  268.22
  -1   3 -12 2957.20  278.35
   1   3  12 2824.91  266.25
   1   3  12 3060.36  297.96
   1  -3  12 3047.39  285.71
  -1   3 -12 3137.56  294.00
   1   3  12 3219.85  301.49
  -1   3 -12 3284.60  307.63
   1  -3  12 3246.35  302.90
  -1  -3 -12 3128.96  294.71
  -1   3 -13   50.64   43.60
  -1  -3 -13   82.09   48.81
   1  -3  13  147.33   62.52
   1   3  13   71.39   48.21
  -1   3 -13  110.80   57.56
  -1  -3 -13   44.62   31.38
   1  -3  13  114.37   43.52
  -1  -3 -13   78.49   52.38
  -1   3 -13  106.31   41.61
   1   3  13  108.87   42.26
   1   3  13  101.02   55.35
   1  -3  13  103.56   43.35
  -1   3 -13   74.06   32.44
   1   3  13   72.58   39.24
  -1   3 -13   96.83   45.60
   1  -3  13   75.28   40.06
  -1  -3 -13   88.58   39.62
  -1   3 -14  471.44   57.92
  -1  -3 -14  392.62   65.26
   1  -3  14  666.01   90.13
   1   3  14  388.85   66.59
  -1   3 -14  599.69   71.93
  -1  -3 -14  341.09   63.87
   1  -3  14  594.69   79.77
  -1  -3 -14  529.16   65.26
   1   3  14  485.22   54.11
  -1   3 -14  539.51   62.17
   1   3  14  537.22   54.09
   1  -3  14  546.55   49.89
  -1   3 -14  526.01   56.87
   1   3  14  510.67   53.18
  -1   3 -14  520.46   55.17
   1  -3  14  594.10   75.34
  -1  -3 -14  487.73   53.01
  -1   3 -15  466.37   64.85
  -1  -3 -15  300.97   58.90
   1  -3  15  383.73   59.25
   1   3  15  384.99   82.44
  -1   3 -15  381.69   48.88
  -1  -3 -15  280.82   55.79
   1  -3  15  376.82   56.18
  -1  -3 -15  414.32   55.18
   1   3  15  311.41   41.01
  -1   3 -15  393.97   51.61
   1   3  15  434.62   58.82
   1  -3  15  350.15   47.98
  -1   3 -15  361.74   49.43
   1   3  15  424.79   47.40
  -1   3 -15  458.21   54.62
  -1  -3 -15  377.22   50.37
   1  -3  15  476.45   55.31
  -1   3 -16   64.30   51.03
  -1  -3 -16   10.55   50.23
   1  -3  16   -3.59   65.98
   1   3  16  -75.34   56.74
  -1   3 -16   28.37   44.31
  -1  -3 -16   11.70   35.08
   1  -3  16   -8.41   48.48
  -1  -3 -16    9.05   48.23
   1   3  16  -15.72   43.03
  -1   3 -16   19.13   47.00
   1   3  16   45.11   46.63
   1  -3  16  -22.37   36.00
   1   3  16  -16.68   42.30
  -1   3 -16    1.82   40.94
  -1   3 -16  -12.90   43.00
  -1  -3 -16    9.71   36.80
   1  -3  16   -1.83   45.79
  -1   3 -17  372.88   64.33
  -1  -3 -17  321.61   70.92
   1  -3  17  403.54   62.89
  -1   3 -17  373.77   50.55
  -1  -3 -17  273.47   57.79
   1  -3  17  416.41   55.44
  -1  -3 -17  313.24   54.23
   1   3  17  255.79   45.79
  -1   3 -17  385.35   55.96
   1   3  17  308.84   54.31
   1  -3  17  367.21   48.74
   1   3  17  363.96   50.07
  -1   3 -17  386.33   49.46
  -1  -3 -17  323.81   53.46
   1  -3  17  444.20   55.45
  -1   3 -18  150.25   54.52
  -1  -3 -18  159.94   56.63
   1  -3  18  125.97   59.55
  -1   3 -18  145.64   48.46
  -1  -3 -18  118.98   42.86
   1  -3  18  107.81   45.01
   1   3  18  134.22   52.87
  -1   3 -18  131.09   58.54
   1  -3  18  108.66   42.07
   1   3  18  140.64   49.08
  -1   3 -18  154.06   44.73
  -1  -3 -18  161.31   46.18
  -1   3 -19  220.10   54.89
  -1  -3 -19  146.46   56.48
   1  -3  19  204.18   72.19
  -1   3 -19  192.55   58.81
  -1  -3 -19  122.15   53.78
   1  -3  19  231.81   59.70
   1   3  19  150.37   49.36
   1  -3  19  206.41   48.07
   1   3  19  210.74   51.54
  -1   3 -19  158.69   50.37
  -1  -3 -19  127.65   47.79
  -1   3 -20  484.09   80.00
  -1  -3 -20  417.04   71.90
  -1   3 -20  439.26   60.04
  -1  -3 -20  302.62   63.49
   1  -3  20  484.01   69.30
   1   3  20  437.76   58.14
   1  -3  20  472.04   77.96
   1   3  20  506.65   72.31
  -1   3 -20  404.63   49.14
  -1  -3 -20  315.72   60.63
  -1   3 -21  -26.57   51.19
  -1  -3 -21   21.55   67.51
  -1   3 -21   43.68   52.29
  -1  -3 -21   23.94   43.16
   1   3  21   -4.14   49.75
   1  -3  21   11.04   43.47
   1   3  21   -5.08   43.30
  -1   3 -21   -9.71   44.47
  -1  -3 -21   38.11   48.91
  -1   3 -22   66.02   66.63
  -1  -3 -22   65.77   62.62
  -1   3 -22   45.42   54.30
  -1  -3 -22   89.66   52.06
   1  -3  22  117.18   49.87
   1   3  22   89.81   47.57
  -1   3 -22   73.37   42.75
  -1  -3 -22   71.91   47.24
  -1   3 -23  353.20   83.38
  -1  -3 -23  162.41   63.24
  -1   3 -23  395.46   65.92
  -1  -3 -23  199.09   60.60
   1  -3  23  435.16   58.68
   1   3  23  300.95   56.47
  -1   3 -23  404.11   60.60
  -1  -3 -23  301.26   54.90
  -1   3 -24  603.64  100.87
  -1  -3 -24  414.82   82.56
  -1   3 -24  554.56   83.72
  -1  -3 -24  292.88   54.74
   1  -3  24  616.96   80.90
   1   3  24  592.53   79.60
  -1   3 -24  586.18   87.32
  -1  -3 -24  483.13   79.09
  -1   3 -25  244.45   67.64
  -1  -3 -25  190.49   69.21
  -1   3 -25  231.04   50.91
  -1  -3 -25  145.28   43.35
   1  -3  25  247.50   54.24
   1   3  25  308.34   53.51
  -1   3 -25  199.12   55.48
  -1  -3 -25  207.22   62.70
  -1   3 -26  -24.07   77.01
  -1  -3 -26  -25.79   70.96
  -1   3 -26  -36.65   48.14
   1  -3  26  -36.06   45.92
   1   3  26   65.12   59.21
  -1   3 -26   14.13   53.43
  -1  -3 -26   61.73   58.72
  -1   3 -27   49.46   72.96
  -1  -3 -27  133.03   75.78
  -1   3 -27   75.37   49.93
   1  -3  27  -12.81   51.98
   1   3  27  -45.56   51.12
  -1   3 -27   38.66   58.38
  -1  -3 -27   38.83   58.57
  -1   3 -28  -35.19   80.64
  -1  -3 -28   31.66   67.14
  -1   3 -28   29.51   57.75
   1  -3  28   24.52   60.26
   1   3  28  -49.60   54.75
  -1   3 -28   -2.61   43.99
  -1  -3 -28  -29.19   55.42
  -1   3 -29  -21.55   65.26
  -1  -3 -29   54.14   90.42
  -1   3 -29   66.86   56.91
   1  -3  29   36.67   65.47
   1   3  29  -16.30   56.31
  -1   3 -29   78.45   46.71
  -1  -3 -29  -20.24   62.90
  -1   3 -30  -44.60   58.70
  -1  -3 -30  -19.87   88.05
   1  -3  30   30.68   62.20
   1   3  30   -6.11   55.23
  -1   3 -30   21.17   60.54
  -1  -3 -30  -38.71   74.49
   1  -4 -30   26.21   89.14
   1   4 -30   14.42   66.64
  -1  -4  30  -20.94   52.96
  -1   4  30   18.76   59.03
   1   4 -30    6.68   63.53
   1  -4 -30   17.62   63.23
   1  -4 -29    0.85   69.65
   1   4 -29   24.25   65.38
  -1  -4  29  -23.74   41.01
  -1   4  29    2.03   55.02
   1   4 -29  -21.56   63.18
   1  -4 -29   93.52   71.02
   1   4 -28   24.11   67.83
   1  -4 -28  -59.09   80.70
   1   4 -28   19.49   67.17
  -1  -4  28  -13.92   45.39
  -1   4  28   23.43   73.43
   1   4 -28   -2.50   63.17
   1  -4 -28   -6.01   59.70
   1   4 -27  428.67   81.03
   1  -4 -27  235.53   66.71
   1   4 -27  354.31   50.74
   1  -4 -27  240.61   53.79
  -1  -4  27  522.51   74.16
  -1   4  27  360.36   56.46
   1   4 -27  437.05   61.18
   1  -4 -27  304.64   72.53
   1   4 -26   72.86   64.94
   1  -4 -26  -31.96   78.82
   1   4 -26   40.38   61.33
   1  -4 -26   59.32   69.69
  -1  -4  26  103.62   56.86
  -1   4  26   66.28   54.09
   1   4 -26   95.15   60.26
   1  -4 -26   81.16   59.19
   1   4 -25 1316.67  161.08
   1  -4 -25 1413.69  108.08
   1   4 -25 1487.24   94.12
   1  -4 -25  975.34  136.68
  -1  -4  25 1747.47   87.48
  -1   4  25 1433.66  103.87
   1   4 -25 1714.75   89.32
   1  -4 -25  998.26  142.92
   1   4 -24  423.98   75.59
   1  -4 -24  287.74   65.68
   1   4 -24  375.72   58.20
   1  -4 -24  244.33   54.95
  -1  -4  24  378.61   59.95
  -1   4  24  324.72   56.51
   1   4 -24  416.38   58.94
   1  -4 -24  329.72   61.99
   1   4 -23   93.03   60.39
   1  -4 -23   64.63   65.47
   1   4 -23   21.92   46.44
   1  -4 -23   63.38   58.37
  -1  -4  23   65.51   46.37
  -1   4  23   70.25   55.83
   1   4 -23   77.92   48.13
   1  -4 -23   78.97   48.78
   1   4 -22   85.63   64.75
   1  -4 -22   56.76   54.58
  -1  -4  22   70.50   86.85
   1   4 -22   76.19   50.78
   1  -4 -22   54.53   49.67
   1   4 -22   71.89   50.80
  -1  -4  22   74.39   49.11
  -1   4  22    7.79   45.57
   1   4 -22   53.66   42.37
   1  -4 -22  122.04   46.28
   1   4 -21  874.64  111.95
   1  -4 -21  851.43  127.48
  -1  -4  21  873.03  120.99
   1   4 -21  718.07   81.66
   1  -4 -21  645.48   90.70
   1   4 -21  804.79   93.12
  -1  -4  21  871.25  101.41
  -1   4  21  636.00   83.10
   1   4 -21  880.90  100.80
   1  -4 -21  537.48   82.32
   1   4 -20    3.01   55.42
   1  -4 -20  -35.25   61.66
  -1  -4  20   16.23   60.49
   1   4 -20   30.97   46.66
   1  -4 -20   61.44   46.73
   1   4 -20   58.23   45.02
  -1  -4  20   24.27   33.87
  -1   4  20  -13.19   44.23
   1   4 -20   76.50   45.86
   1  -4 -20   17.52   48.85
   1   4 -19 1720.91  170.79
   1  -4 -19 1645.71  202.78
  -1  -4  19 1728.83  189.92
   1   4 -19 1710.45  163.61
   1  -4 -19 1215.70  152.05
   1   4 -19 1625.55  158.76
  -1   4  19 1251.43  124.49
  -1  -4  19 1312.25  125.14
  -1   4  19 1009.59  102.04
   1   4 -19 1440.25  136.63
   1  -4 -19 1455.11  154.23
   1   4 -18  305.97   61.57
   1  -4 -18  253.35   69.26
  -1  -4  18  299.42   61.44
   1   4 -18  378.16   91.46
   1  -4 -18  242.34   48.23
   1   4 -18  253.48   44.58
  -1   4  18  213.43   53.55
  -1  -4  18  228.96   39.12
  -1   4  18  224.23   44.15
   1   4 -18  264.74   52.48
   1   4 -18  306.75   46.31
   1  -4 -18  348.51   54.00
   1   4 -17   62.70   46.44
   1  -4 -17   41.48   54.20
  -1  -4  17   89.43   50.41
  -1   4  17   74.96   65.20
   1   4 -17   49.08   44.33
   1  -4 -17   98.66   45.62
  -1  -4  17   52.84   55.70
   1   4 -17   32.60   58.18
  -1   4  17   72.28   42.07
  -1  -4  17   37.15   35.82
   1   4 -17   56.29   41.94
  -1   4  17  130.02   43.69
   1   4 -17   77.10   44.38
   1  -4 -17   79.56   47.30
   1   4 -16  103.20   48.72
   1  -4 -16   44.73   51.56
  -1  -4  16  103.43   50.47
  -1   4  16  110.68   67.95
   1   4 -16  102.27   43.05
   1  -4 -16   59.99   44.68
  -1  -4  16   97.55   45.03
   1   4 -16   90.21   55.80
  -1   4  16   61.82   44.04
  -1  -4  16   62.04   40.18
   1   4 -16   84.53   41.33
  -1   4  16  124.30   45.66
   1   4 -16   54.58   38.51
   1  -4 -16   35.16   31.70
  -1   4  16   44.74   43.33
   1   4 -15    4.44   45.03
   1  -4 -15  -26.68   50.38
  -1  -4  15   13.67   54.93
  -1   4  15   11.13   57.21
   1   4 -15  -10.81   37.38
  -1  -4  15   -7.91   45.30
   1  -4 -15    8.60   41.11
   1   4 -15   10.39   39.13
  -1   4  15   18.38   39.66
  -1  -4  15    9.53   37.86
   1   4 -15   -5.24   41.81
  -1   4  15   39.69   37.75
   1  -4 -15   13.51   41.17
  -1   4  15   11.69   43.96
   1   4 -14  683.13   84.73
   1  -4 -14  573.28   97.77
  -1  -4  14  714.74   93.57
  -1   4  14  603.24   92.90
   1   4 -14  731.26   87.33
  -1  -4  14  758.35   91.89
   1  -4 -14  561.34   59.78
   1   4 -14  593.23   72.31
  -1   4  14  456.44   84.09
  -1   4  14  687.27   84.45
  -1  -4  14  682.85   78.73
   1   4 -14  667.13   77.16
  -1   4  14  610.02   69.56
   1  -4 -14  630.55   74.42
  -1   4  14  574.93   78.27
   1   4 -13 1615.04  161.74
   1  -4 -13 1367.27  167.41
  -1  -4  13 1412.56   90.51
  -1   4  13 1223.68  154.04
   1   4 -13 1675.44  162.01
  -1  -4  13 1464.14  144.12
  -1   4  13  921.70  148.66
  -1   4  13 1306.66  128.14
  -1  -4  13 1468.11  142.33
   1   4 -13 1496.90  144.16
  -1   4  13 1327.86  125.44
   1  -4 -13 1365.73  131.77
  -1   4  13 1218.46  120.89
   1   4 -12 2205.97  217.48
   1  -4 -12 2127.06  241.30
  -1  -4  12 2072.02  209.02
  -1   4  12 1620.28  167.70
   1   4 -12 2424.65  234.90
  -1  -4  12 2414.02  231.69
  -1   4  12 1355.16  171.09
  -1   4  12 2153.45  209.64
  -1  -4  12 2172.05  209.23
   1   4 -12 2164.14  207.70
  -1   4  12 2025.25  195.61
   1  -4 -12 2051.63  206.63
  -1   4  12 1955.72  188.60
   1   4 -11 1960.67  197.07
   1  -4 -11 1979.41  225.06
  -1  -4  11 1814.68  148.21
  -1   4  11 1269.00  139.86
   1   4 -11 2058.42  245.32
  -1  -4  11 2119.42  207.12
  -1   4  11 1489.49  174.86
  -1   4  11 1837.87   80.86
  -1  -4  11 1820.28  140.62
   1   4 -11 1860.27  182.77
  -1   4  11 1844.65  182.74
   1  -4 -11 1624.01  128.88
  -1   4  11 1755.40  143.78
   1   4 -10 1689.61  141.55
  -1  -4  10 1548.50  131.49
   1  -4 -10 1263.62  134.87
  -1   4  10 1327.90  142.66
   1   4 -10 1701.65  137.65
  -1  -4  10 1660.36  134.69
  -1   4  10 1224.53  135.54
  -1   4  10 1394.48  117.57
  -1  -4  10 1584.46  129.46
   1   4 -10 1662.17  135.29
  -1   4  10 1556.52  127.32
  -1  -4  10 1414.31  118.09
   1  -4 -10 1538.47  127.12
  -1   4  10 1541.57  126.78
   1   4  -9   22.10   40.83
  -1  -4   9  -10.67   52.45
   1  -4  -9    5.02   51.44
  -1   4   9    1.24   63.60
   1   4  -9   48.32   40.26
  -1  -4   9   48.66   49.46
  -1   4   9   -2.88   41.69
  -1  -4   9   -3.21   30.08
   1   4  -9  -25.58   42.67
  -1   4   9   30.08   30.03
  -1  -4   9    8.85   42.50
  -1   4   9    3.45   43.10
   1   4  -8  815.19   76.80
  -1  -4   8  759.98   65.03
  -1   4   8  649.73   69.31
   1   4  -8  743.48   59.74
   1  -4  -8  680.28   52.86
  -1   4   8  705.13   58.06
  -1  -4   8  730.49   56.40
   1   4  -8  821.85   68.79
  -1  -4   8  803.12   62.46
   1  -4  -8  759.72   63.40
  -1   4   8  666.78   51.85
   1   4  -7  214.27   55.72
  -1   4   7  188.07   62.44
   1  -4  -7  163.55   41.62
  -1   4   7  169.41   50.30
  -1  -4   7  149.24   33.94
   1   4  -7  225.64   47.93
   1   4  -7  144.55   39.82
  -1  -4   7  225.24   45.68
   1  -4  -7  229.15   43.67
  -1   4   7  200.33   48.99
   1   4  -6  833.65  118.61
   1  -4  -6  707.78   54.87
  -1   4   6  672.65   54.19
  -1  -4   6  689.68   52.05
   1   4  -6  708.72   54.94
   1   4  -6  689.97   52.16
  -1  -4   6  765.20   58.37
   1  -4  -6  565.93   45.91
  -1   4   6  583.00   45.98
   1   4  -5  643.43  101.89
   1  -4  -5  571.61   59.50
  -1  -4   5  659.92   59.65
   1  -4  -5  572.84   54.06
  -1   4   5  582.68   53.16
  -1  -4   5  661.92   52.77
   1   4  -5  639.73   55.20
   1   4  -5  637.90   55.31
  -1  -4   5  674.70   57.27
  -1  -4   4  522.45   69.66
   1  -4  -4  478.97   56.61
  -1  -4   4  499.53   54.89
   1  -4  -4  323.91   35.25
  -1   4   4  428.23   45.86
  -1  -4   4  484.32   49.00
   1   4  -4  459.56   52.29
   1   4  -4  478.37   51.43
  -1  -4   4  511.21   55.97
   1  -4  -3 2394.01  164.55
  -1   4   3 2891.01  181.32
   1  -4  -3 2749.23  172.93
   1   4  -3 2635.61  164.54
  -1  -4   3 2964.65  183.99
   1  -4  -3 3065.53  191.01
   1  -4  -3 2748.63  172.31
  -1   4   3 2833.46  175.79
  -1  -4   3 2575.79  158.90
   1   4  -3 2983.34  184.03
   1   4  -3 2912.87  180.41
  -1  -4   3 2437.63  151.56
  -1  -4   2  225.42   56.53
   1   4  -2  222.61   63.23
   1  -4  -2  177.07   57.89
  -1   4   2  181.75   40.79
   1  -4  -2  208.55   49.48
   1   4  -2  226.39   47.85
  -1  -4   2  205.20   41.95
   1  -4  -2  181.77   50.16
   1  -4  -2  159.77   32.91
  -1   4   2  135.04   30.15
  -1  -4   2  178.77   34.40
   1   4  -2  184.52   39.73
  -1  -4   2  192.60   39.53
  -1  -4   1 6970.20  256.21
   1   4  -1 6942.86  294.09
   1  -4  -1 5739.98  207.04
  -1   4   1 5213.58  189.57
   1  -4  -1 5660.28  200.05
   1   4  -1 7037.90  244.01
   1  -4  -1 5715.36  197.54
  -1  -4   1 6089.71  211.77
   1  -4  -1 5931.50  205.33
   1   4  -1 5781.38  202.24
  -1   4   1 6131.23  211.35
  -1  -4   0  296.81   65.31
   1   4   0  270.80   65.33
   1  -4   0  310.57   55.11
  -1   4   0  255.95   48.49
   1  -4   0  210.07   42.52
   1   4   0  276.34   48.34
  -1  -4   0  275.55   45.38
  -1   4   0  273.90   92.32
   1  -4   0  224.62   86.90
   1   4   0  278.57   42.82
  -1  -4   0  262.43   42.22
   1  -4   0  296.27   46.80
  -1   4   0  271.80   48.91
   1   4   132421.00  950.37
   1  -4   134196.40  996.15
  -1   4  -134856.44 1010.87
   1   4   133227.13  967.60
  -1   4  -133404.71  961.43
   1  -4   134700.54 1006.17
   1   4   131684.54  932.55
   1  -4   133991.43  980.92
  -1   4  -134258.82  987.09
  -1  -4  -131120.58  897.73
   1  -4   2  303.62   52.78
  -1  -4  -2  467.82   70.72
   1   4   2  373.51   64.44
   1  -4   2  383.37   50.94
   1   4   2  333.67   84.60
  -1   4  -2  369.02   59.56
   1  -4   2  326.01   44.15
  -1   4  -2  362.60   46.17
  -1  -4  -2  363.42   46.34
   1   4   2  365.05   51.13
  -1   4  -3  598.19   59.98
   1  -4   3  727.62   73.77
  -1  -4  -3  613.48   58.52
   1   4   3  534.78   68.90
   1   4   3  592.90   62.13
  -1   4  -3  696.66   62.79
  -1   4  -3  717.89   60.84
  -1  -4  -3  599.58   49.81
   1   4   3  637.86   52.17
  -1   4  -4 4153.25  127.43
   1  -4   4 4587.80  185.48
  -1  -4  -4 4104.77  148.77
   1   4   4 3150.11  229.34
   1   4   4 4173.63  123.19
  -1   4  -4 4012.82  238.37
   1  -4   4 3577.54  214.53
  -1   4  -4 4375.15  164.38
   1  -4   4 4393.62  164.42
   1   4   4 3915.50  231.29
  -1   4  -5  988.82   86.92
   1  -4   5  984.93   92.07
  -1  -4  -5  696.60   79.11
   1   4   5  852.95   86.20
  -1   4  -5  967.13   78.40
   1  -4   5  864.05   71.13
   1   4   5  672.48   49.55
  -1   4  -5  712.83   54.36
   1  -4   5  856.18   68.12
   1   4   5  861.27   70.59
  -1   4  -6   15.72   46.67
   1  -4   6    6.40   38.89
  -1  -4  -6   39.08   52.39
   1   4   6   29.71   40.92
  -1   4  -6   21.52   23.59
   1  -4   6   22.42   43.18
  -1  -4  -6   -7.69   39.43
   1   4   6   43.12   40.08
  -1   4  -6   44.27   32.11
   1  -4   6   21.47   39.92
   1   4   6   63.07   39.73
  -1   4  -7 4694.89  174.72
   1  -4   7 5972.14  218.61
  -1  -4  -7 5288.62  263.05
  -1   4  -7 6305.45  220.79
   1  -4   7 4733.40  165.37
  -1  -4  -7 5135.98  197.21
  -1   4  -7 5690.06  200.59
  -1  -4  -7 4779.90  179.03
   1   4   7 5611.26  198.61
  -1   4  -7 5948.83  205.83
   1  -4   7 6084.69  210.21
   1   4   7 5405.16  192.24
  -1   4  -8 1411.04   96.87
   1  -4   8 1828.08  132.66
  -1   4  -8 1754.61  111.97
   1  -4   8 1824.96  127.81
  -1  -4  -8 1576.70  111.72
  -1   4  -8 1869.46  134.43
  -1  -4  -8 1556.16  106.52
   1   4   8 1688.90  108.90
  -1   4  -8 1803.91   76.34
   1  -4   8 1718.70  108.75
  -1  -4  -8 1576.80   96.68
  -1   4  -9 4328.36  315.59
   1  -4   9 4987.60  362.71
  -1   4  -9 4517.24  324.86
   1  -4   9 5211.61  373.54
  -1  -4  -9 4000.02  360.84
  -1  -4  -9 4936.49  371.31
  -1   4  -9 5001.27  359.43
   1   4   9 4913.23  354.44
   1  -4   9 3911.87  283.46
   1   4   9 5020.50  360.62
  -1   4  -9 4702.55  337.37
   1  -4   9 5264.71  375.49
  -1  -4  -9 4834.25  349.34
  -1   4 -10   62.76   50.68
   1  -4  10   81.28   50.55
  -1   4 -10   71.28   42.61
   1  -4  10   84.56   46.40
  -1  -4 -10   76.16   39.69
  -1  -4 -10   25.19   37.17
  -1   4 -10   53.15   47.76
   1   4  10   46.99   46.19
   1  -4  10   90.31   42.25
  -1   4 -10   70.96   39.92
   1   4  10  143.70   39.73
  -1   4 -10  102.06   34.35
   1  -4  10   63.13   46.30
  -1  -4 -10   99.86   31.92
  -1   4 -11 1484.77  125.76
   1  -4  11 1828.74   96.55
  -1   4 -11 1665.84  132.49
   1  -4  11 1561.08  123.95
  -1  -4 -11 1233.12  149.59
  -1  -4 -11 1231.40  101.58
  -1   4 -11 1444.90  116.93
   1   4  11 1673.35  137.72
   1  -4  11 1794.05  140.47
  -1   4 -11 1516.36  120.83
   1   4  11 1580.12  123.83
  -1   4 -11 1754.98  138.70
   1  -4  11 1841.75   78.18
  -1  -4 -11 1517.86  124.68
  -1   4 -12   13.33   78.49
   1  -4  12   38.76   50.08
   1   4  12   27.46   62.36
   1  -4  12   35.40   38.62
  -1  -4 -12   17.29   37.27
  -1  -4 -12   65.77   48.03
  -1   4 -12   81.76   43.67
   1   4  12   23.94   68.67
   1  -4  12  -12.92   34.68
  -1   4 -12   31.54   39.77
   1   4  12   -3.89   30.41
  -1   4 -12   40.08   42.57
   1  -4  12   26.58   43.73
  -1  -4 -12   53.59   38.99
  -1   4 -13 1629.46  156.47
   1  -4  13 2309.08  224.52
  -1  -4 -13 1293.64  167.10
   1   4  13 1484.75  158.42
  -1   4 -13 2122.60  199.93
   1  -4  13 1834.89  169.97
  -1  -4 -13 1367.49  168.55
  -1  -4 -13 1782.46  179.88
  -1   4 -13 1914.76  177.41
   1   4  13 1543.53  145.35
   1  -4  13 2064.30  190.77
  -1   4 -13 1496.34  138.30
   1   4  13 1959.38  181.82
  -1   4 -13 2106.04  194.70
   1  -4  13 2022.51  187.31
  -1  -4 -13 2031.30  191.42
  -1   4 -14  203.63   53.43
  -1  -4 -14  250.46   53.72
   1  -4  14  251.77   65.18
   1   4  14  156.56   51.33
  -1   4 -14  232.65   60.16
   1  -4  14  264.63   53.29
  -1  -4 -14  146.58   42.15
  -1  -4 -14  177.48   48.11
  -1   4 -14  194.38   43.75
   1   4  14  271.06   45.20
   1   4  14  182.86   40.71
   1  -4  14  272.13   47.13
  -1   4 -14  205.31   46.15
   1   4  14  248.12   45.44
  -1   4 -14  208.97   34.87
   1  -4  14  226.40   45.79
  -1  -4 -14  219.18   43.30
  -1   4 -15  575.76   74.94
  -1  -4 -15  448.00   66.50
   1  -4  15  633.48   85.97
   1   4  15  431.26   78.10
  -1   4 -15  649.58   76.63
  -1  -4 -15  364.82   77.26
   1  -4  15  652.06   81.73
  -1  -4 -15  368.69   45.63
  -1   4 -15  576.16   72.78
   1   4  15  516.12   52.68
   1   4  15  461.03   52.20
   1  -4  15  557.87   71.78
  -1   4 -15  610.80   72.43
   1   4  15  551.05   67.95
  -1   4 -15  468.45   40.65
   1  -4  15  584.40   71.21
  -1  -4 -15  537.96   68.68
  -1   4 -16  341.78   65.32
  -1  -4 -16  285.55   66.46
   1  -4  16  342.48   59.50
   1   4  16  248.92   61.80
  -1   4 -16  302.72   49.58
  -1  -4 -16  195.27   56.07
   1  -4  16  261.11   54.16
  -1  -4 -16  185.21   41.05
   1   4  16  254.37   44.30
  -1   4 -16  253.71   50.87
   1   4  16  252.76   50.85
   1  -4  16  345.11   52.72
  -1   4 -16  295.97   50.39
   1   4  16  267.75   46.29
  -1   4 -16  261.28   47.96
   1  -4  16  322.03   51.48
  -1  -4 -16  244.86   45.03
  -1   4 -17   76.59   61.20
  -1  -4 -17   51.50   50.79
   1  -4  17   76.86   49.23
  -1   4 -17  102.10   40.19
  -1  -4 -17   72.58   48.17
   1  -4  17  132.89   44.88
   1   4  17   81.36   40.48
  -1   4 -17  131.06   52.82
   1   4  17   94.98   42.48
   1  -4  17  130.56   44.87
   1   4  17   66.59   38.88
  -1   4 -17   63.61   33.62
  -1  -4 -17   86.21   40.17
  -1   4 -18  266.66   55.38
  -1  -4 -18  182.74   62.86
   1  -4  18  217.55   61.91
  -1   4 -18  273.38   49.05
  -1  -4 -18  163.64   48.05
   1  -4  18  233.99   45.41
   1   4  18  147.62   51.28
  -1   4 -18  155.89   49.81
   1  -4  18  227.04   40.70
   1   4  18  183.66   47.60
  -1   4 -18  279.84   46.47
  -1  -4 -18  194.17   48.57
  -1   4 -19 1080.47  120.38
  -1  -4 -19  721.36  118.73
   1  -4  19 1171.16  127.19
  -1   4 -19  982.52  110.84
  -1  -4 -19  661.61   98.67
   1  -4  19 1055.74  110.35
   1   4  19  897.07  105.12
   1  -4  19 1068.91  109.98
   1   4  19  969.80  105.53
  -1   4 -19 1033.10  104.99
  -1  -4 -19  735.82   90.57
  -1   4 -20  181.37   60.27
  -1  -4 -20  141.66   71.64
  -1   4 -20  119.94   51.85
  -1  -4 -20   93.20   44.81
   1   4  20  108.94   44.90
   1  -4  20  202.28   48.52
   1   4  20  160.95   45.21
  -1   4 -20  143.23   42.28
  -1  -4 -20   85.49   46.66
  -1   4 -21  481.01   73.44
  -1  -4 -21  483.24   91.69
  -1   4 -21  504.41   70.72
  -1  -4 -21  258.67   59.09
   1   4  21  322.77   59.24
   1  -4  21  566.80   70.50
   1   4  21  558.78   78.34
  -1   4 -21  517.88   68.40
  -1  -4 -21  435.69   58.86
  -1   4 -22  458.45   74.69
  -1  -4 -22  307.49   63.50
  -1   4 -22  348.01   53.58
  -1  -4 -22  318.52   63.66
   1   4  22  305.26   62.06
   1  -4  22  504.47   71.47
   1   4  22  404.13   56.70
  -1   4 -22  383.04   48.46
  -1  -4 -22  308.05   57.51
  -1   4 -23  147.01   58.79
  -1  -4 -23   24.06   84.85
  -1   4 -23  114.62   60.06
  -1  -4 -23   70.68   43.68
   1  -4  23   70.23   51.01
   1   4  23   81.61   49.24
  -1   4 -23   92.89   44.56
  -1  -4 -23  103.17   46.57
  -1   4 -24  110.65   60.39
  -1  -4 -24  114.06   72.80
  -1   4 -24   59.62   49.50
  -1  -4 -24   41.12   44.69
   1  -4  24   46.30   44.56
   1   4  24   99.13   46.29
  -1   4 -24   68.35   44.19
  -1  -4 -24   79.74   49.10
  -1   4 -25  287.73   64.68
  -1  -4 -25  304.55   89.41
  -1   4 -25  273.07   59.40
   1  -4  25  483.35   59.96
   1   4  25  290.73   57.59
  -1   4 -25  280.13   42.85
  -1  -4 -25  175.89   56.49
  -1   4 -26  -19.68   50.39
  -1  -4 -26   -1.63   68.99
  -1   4 -26   15.35   56.58
   1  -4  26   26.66   61.58
   1   4  26   57.37   63.05
  -1   4 -26   34.66   52.56
  -1  -4 -26  -33.60   58.40
  -1   4 -27   18.06   73.99
  -1  -4 -27   52.19   60.44
  -1   4 -27    8.17   61.10
   1  -4  27   27.43   63.46
   1   4  27    0.44   47.43
  -1   4 -27   -9.74   63.64
  -1  -4 -27   60.90   62.87
  -1   4 -28  -34.71   72.33
  -1  -4 -28   34.35   78.54
  -1   4 -28  -17.65   54.08
   1  -4  28  -49.31   42.87
   1   4  28  -68.88   58.78
  -1   4 -28  -65.02   55.66
  -1  -4 -28   57.17   56.64
  -1   4 -29  277.19   66.88
  -1  -4 -29  178.56   88.31
  -1   4 -29  247.74   65.99
   1  -4  29  319.54   59.79
   1   4  29  286.99   68.58
  -1   4 -29  237.50   73.02
  -1  -4 -29  222.23   62.47
  -1   4 -30    8.74   74.99
  -1  -4 -30  -32.69   70.12
   1  -4  30   31.44   52.43
   1   4  30   32.72   47.78
  -1   4 -30   23.71   67.94
  -1  -4 -30  -55.62   67.58
   1  -5 -30  253.45   92.56
   1   5 -30  309.45   71.88
  -1  -5  30  386.01   64.10
  -1   5  30  215.57   70.67
   1   5 -30  272.82   65.46
   1  -5 -30  259.58   69.19
   1  -5 -29  151.94   86.79
   1   5 -29   94.94   53.29
  -1  -5  29  142.20   60.90
  -1   5  29   56.02   52.87
   1   5 -29   60.55   55.52
   1  -5 -29   75.54   63.66
   1  -5 -28   93.45   62.93
   1   5 -28   18.50   64.93
  -1  -5  28   97.10   58.18
  -1   5  28  -39.34   50.55
   1   5 -28   24.71   59.25
   1  -5 -28   78.65   60.40
   1   5 -27    8.99   65.04
   1  -5 -27   21.57   77.90
   1   5 -27   24.50   56.09
   1  -5 -27   21.19   56.57
  -1  -5  27   85.15   65.11
  -1   5  27   -8.59   55.08
   1   5 -27   61.90   47.91
   1  -5 -27   20.46   53.89
   1   5 -26  147.41   65.99
   1  -5 -26   97.29   79.66
   1   5 -26  263.03   65.88
   1  -5 -26  125.09   53.10
  -1  -5  26  160.00   54.64
  -1   5  26  105.12   56.35
   1   5 -26  173.56   59.88
   1  -5 -26  119.35   53.90
   1   5 -25   44.24   64.78
   1  -5 -25   16.38   67.28
   1   5 -25  -11.72   36.83
   1  -5 -25   29.49   52.57
  -1  -5  25    3.58   56.21
  -1   5  25    5.06   61.30
   1   5 -25   16.50   57.61
   1  -5 -25   46.54   61.78
   1   5 -24  666.17   96.03
   1  -5 -24  387.33   87.31
   1   5 -24  601.37   86.04
   1  -5 -24  487.58   77.39
  -1  -5  24  519.36   76.51
  -1   5  24  516.22   76.91
   1   5 -24  655.66   86.86
   1  -5 -24  379.16   65.64
   1   5 -23  713.80  104.35
   1  -5 -23  528.63   82.74
   1   5 -23  706.34   78.32
   1  -5 -23  401.54   57.16
  -1  -5  23  601.68   65.10
  -1   5  23  485.63   63.34
   1   5 -23  700.14   80.30
   1  -5 -23  584.96   74.92
   1   5 -22   36.67   62.06
   1  -5 -22  -21.23   58.48
   1   5 -22   19.59   47.87
   1  -5 -22   79.02   49.41
  -1  -5  22    9.69   38.80
  -1   5  22   -1.36   49.84
   1   5 -22   22.61   43.88
   1  -5 -22   -3.13   55.72
   1   5 -21  414.81   56.45
   1  -5 -21  432.27   80.08
  -1  -5  21  464.19   88.05
   1   5 -21  529.57   66.35
   1  -5 -21  394.19   70.25
  -1  -5  21  407.19   43.12
  -1   5  21  270.34   40.83
   1   5 -21  486.83   66.96
   1  -5 -21  355.85   52.04
   1   5 -20 2131.54  243.83
   1  -5 -20 2110.40  271.62
  -1  -5  20 2631.75  313.57
   1   5 -20 2509.43  281.67
   1  -5 -20 1843.28  239.36
   1   5 -20 2452.48  278.62
  -1  -5  20 1989.41  226.32
  -1   5  20 2107.43  244.53
   1   5 -20 2589.99  289.88
   1  -5 -20 1989.08  234.27
   1   5 -19  -19.27   62.50
   1  -5 -19   40.24   62.80
  -1  -5  19  -13.62   63.36
   1   5 -19   41.51   55.36
   1  -5 -19   13.68   43.11
   1   5 -19   28.56   50.45
  -1   5  19   22.34   47.06
  -1  -5  19   17.94   31.54
  -1   5  19  -10.08   45.10
   1   5 -19  100.82   46.73
   1  -5 -19   48.80   45.74
   1   5 -18  268.03   66.32
   1  -5 -18  290.13   66.30
  -1  -5  18  277.41   64.69
   1   5 -18  226.39   42.79
   1  -5 -18  203.83   52.84
   1   5 -18  219.45   47.64
  -1   5  18  200.53   46.68
  -1  -5  18  213.23   37.60
   1   5 -18  181.20   48.45
  -1   5  18  228.61   50.72
   1   5 -18  266.42   47.66
   1  -5 -18  218.71   48.45
   1   5 -17   79.91   59.24
   1  -5 -17   59.58   59.78
  -1  -5  17   47.44   60.00
   1   5 -17  100.96   41.52
   1  -5 -17   60.11   42.23
   1   5 -17  128.65   53.35
  -1   5  17   72.57   49.39
  -1  -5  17   68.69   34.85
   1   5 -17   89.91   31.92
  -1   5  17   54.38   40.26
   1   5 -17   48.62   45.10
   1  -5 -17   67.13   47.54
   1   5 -16 1157.58  141.02
   1  -5 -16  973.41  118.52
  -1  -5  16 1328.16  166.63
  -1   5  16  750.07  114.86
   1   5 -16 1144.53  137.24
  -1  -5  16 1563.49  181.70
   1  -5 -16 1055.92  164.11
  -1   5  16  651.89  120.72
   1   5 -16 1243.16  157.40
  -1   5  16 1075.09  134.44
  -1  -5  16 1132.56  134.64
   1   5 -16 1184.80  142.37
  -1   5  16 1069.02  127.70
   1  -5 -16 1003.80  116.96
  -1   5  16  958.40  111.01
   1   5 -15   44.75   43.42
   1  -5 -15   98.59   55.16
  -1  -5  15   21.28   50.94
  -1   5  15   -7.85   52.39
   1   5 -15    2.55   39.16
  -1  -5  15   -8.68   44.61
  -1   5  15   13.42   42.21
  -1   5  15   -2.75   47.57
  -1  -5  15   26.43   37.20
   1   5 -15    7.93   39.49
  -1   5  15   -8.58   30.51
   1  -5 -15   29.68   44.95
  -1   5  15   18.05   44.96
   1   5 -14 1745.64  184.19
   1  -5 -14 1533.65  175.66
  -1  -5  14 1574.49  174.68
  -1   5  14 1305.68  158.54
   1   5 -14 1722.98  178.71
  -1  -5  14 1911.06  196.25
  -1   5  14 1013.55  141.57
  -1   5  14 1442.19  153.79
  -1  -5  14 1682.38  174.72
   1   5 -14 1620.60  166.04
  -1   5  14 1501.84  156.56
   1  -5 -14 1467.69  160.39
  -1   5  14 1545.75  166.97
   1   5 -13   72.19   49.33
   1  -5 -13  105.42   53.30
  -1  -5  13   85.11   50.38
  -1   5  13   23.49   54.01
   1   5 -13   82.82   63.80
  -1  -5  13   64.83   41.56
  -1   5  13   52.13   36.87
  -1   5  13   40.97   42.29
  -1  -5  13   71.13   49.19
   1   5 -13  116.30   42.11
  -1   5  13   39.88   28.88
   1  -5 -13   85.73   37.72
  -1   5  13   56.16   51.64
   1   5 -12  741.50   74.98
   1  -5 -12  470.44   81.53
  -1  -5  12  678.97   67.67
  -1   5  12  419.31   98.12
   1   5 -12  693.44   58.44
  -1  -5  12  652.63   60.11
  -1   5  12  458.24   57.25
  -1   5  12  531.49   55.76
  -1  -5  12  597.42   53.44
   1   5 -12  532.73   47.53
  -1   5  12  555.24   50.60
   1  -5 -12  612.14   53.95
  -1   5  12  595.16   51.28
   1   5 -11  501.68   63.84
  -1  -5  11  437.32   51.01
   1  -5 -11  353.63   65.86
  -1   5  11  363.15   70.59
   1   5 -11  487.65   50.57
  -1  -5  11  446.41   55.86
  -1   5  11  432.23   53.76
  -1  -5  11  418.40   47.83
   1   5 -11  482.48   53.99
  -1   5  11  461.99   47.79
  -1  -5  11  455.34   50.39
   1  -5 -11  374.43   38.53
  -1   5  11  503.78   54.07
   1   5 -10 4067.28  303.43
  -1  -5  10 4204.96  313.16
   1  -5 -10 2394.45  237.74
  -1   5  10 3237.44  277.20
   1   5 -10 3897.72  285.48
  -1  -5  10 3728.79  274.58
  -1   5  10 3462.55  255.33
  -1  -5  10 3693.89  270.78
   1   5 -10 3637.56  265.76
  -1   5  10 3592.92  263.60
  -1  -5  10 3754.69  275.32
  -1   5  10 3064.31  234.40
   1   5  -9 1132.34  107.87
  -1  -5   9 1363.43  124.49
  -1   5   9  983.38  106.16
   1   5  -9 1029.23  158.34
   1  -5  -9  969.89   62.56
  -1   5   9  974.80   64.78
  -1  -5   9 1172.04  102.81
   1   5  -9 1117.44   99.07
  -1  -5   9 1139.70  103.99
   1  -5  -9 1096.85   98.03
  -1   5   9 1088.91   98.55
   1   5  -8 2955.17  221.38
   1  -5  -8 3283.59  256.73
  -1   5   8 2288.16  168.14
  -1  -5   8 3683.66  269.39
   1   5  -8 3897.75  285.63
   1   5  -8 3263.82  240.86
  -1  -5   8 3647.14  269.78
   1  -5  -8 2858.59  217.21
  -1   5   8 3214.16  238.80
   1   5  -7  716.44  124.98
   1  -5  -7  621.94   55.47
   1  -5  -7  610.98   57.72
   1  -5  -7  598.79   50.32
  -1   5   7  631.61   52.75
  -1  -5   7  660.30   60.35
   1   5  -7  688.85   62.45
   1   5  -7  668.54   50.03
  -1  -5   7  674.67   57.46
  -1   5   7  642.94   52.40
   1   5  -6   14.73   90.75
   1  -5  -6   80.26   41.05
  -1  -5   6   41.31   35.30
   1  -5  -6   72.73   44.47
   1  -5  -6   60.81   37.73
  -1   5   6   83.47   38.51
  -1  -5   6   91.55   34.72
   1   5  -6   55.84   37.35
   1   5  -6   78.35   33.04
  -1  -5   6   89.02   39.87
   1  -5  -5  161.38   46.62
  -1  -5   5  166.12   48.55
   1  -5  -5  145.71   42.38
   1  -5  -5  178.04   44.33
  -1   5   5  172.10   41.95
  -1  -5   5  140.03   36.95
   1   5  -5  197.31   47.00
   1   5  -5  134.26   28.44
  -1  -5   5  185.02   52.92
  -1  -5   4  418.79   78.08
   1  -5  -4  405.20   55.80
  -1  -5   4  451.81   53.23
  -1   5   4  398.29   43.37
   1  -5  -4  273.36   39.98
   1   5  -4  398.74   47.52
  -1  -5   4  417.15   51.08
   1  -5  -4  423.32   51.21
   1  -5  -4  353.69   44.12
  -1   5   4  360.86   46.20
  -1  -5   4  367.31   42.41
   1   5  -4  430.62   53.07
   1   5  -4  422.44   48.22
  -1  -5   4  334.76   41.35
  -1  -5   3  236.25   60.82
   1  -5  -3  197.38   57.48
  -1   5   3  234.90   61.56
  -1   5   3  206.92   45.66
   1  -5  -3  208.89   44.98
   1   5  -3  192.55   48.80
  -1  -5   3  175.51   41.62
   1  -5  -3  190.38   43.52
   1  -5  -3  168.25   37.64
  -1   5   3  184.21   41.02
  -1  -5   3  241.61   43.67
   1   5  -3  202.56   47.48
  -1  -5   3  217.42   43.49
  -1  -5   2  472.39   85.19
   1  -5  -2  296.02   48.77
   1   5  -2  333.51   72.84
  -1   5   2  300.78   55.42
  -1   5   2  286.28   36.81
   1  -5  -2  331.81   51.91
   1   5  -2  378.33   47.59
  -1  -5   2  351.62   51.64
   1  -5  -2  389.29   52.58
   1  -5  -2  350.40   47.49
  -1  -5   2  330.46   43.31
  -1   5   2  346.43   48.26
   1   5  -2  378.45   50.78
  -1  -5   2  354.18   45.34
  -1   5   124226.42  718.59
  -1   5   124011.82  712.20
   1   5  -128092.10  830.20
  -1  -5   124906.67  728.90
   1  -5  -125556.46  743.34
  -1  -5   122871.40  668.95
   1  -5  -123884.90  697.46
  -1   5   127660.28  807.67
  -1  -5   0 4219.29  159.23
   1   5   0 3786.02  243.90
   1  -5   0 3708.73  231.19
  -1   5   0 3610.32  219.56
   1  -5   0 3704.49  222.03
   1   5   0 3592.65  217.48
  -1  -5   0 4388.90  185.87
  -1   5   0 3581.29  214.06
   1  -5   0 4113.66  110.52
   1   5   0 3911.01  233.88
  -1  -5   0 3524.03  212.42
   1  -5   0 3996.86  237.97
  -1   5   0 4058.29  109.35
  -1  -5  -1  966.82  114.00
   1   5   1  861.00  119.48
   1  -5   1  783.05   59.12
  -1   5  -1  784.74   62.84
   1  -5   1  625.85   54.18
   1   5   1  954.31   81.17
  -1  -5  -1  866.37   75.90
  -1   5  -1  902.67   72.42
   1   5   1  821.82   68.61
   1  -5   1  673.53   48.81
  -1  -5  -1  697.07   51.35
   1  -5   1  795.79   54.80
  -1   5  -1  788.75   53.49
  -1  -5  -1  780.52   54.18
   1  -5   2 5245.93  205.91
  -1  -5  -2 4917.41  245.35
   1   5   2 5369.86  303.84
   1  -5   2 4665.75  175.02
   1   5   2 4164.09  137.56
  -1  -5  -2 4341.54  206.59
   1   5   2 4898.72  184.43
  -1   5  -2 5097.77  194.86
   1  -5   2 4808.10  174.69
  -1   5  -2 5248.46  190.48
  -1  -5  -2 4416.64  160.72
   1  -5   3 2413.03  163.38
  -1  -5  -3 2438.87  227.92
   1   5   3 2429.92  189.53
   1  -5   3 2531.85  164.58
   1   5   3 1839.89  230.31
  -1  -5  -3 1731.56  128.67
   1   5   3 2225.84  158.65
   1  -5   3 1963.92  127.66
  -1   5  -3 2544.19  161.47
  -1  -5  -3 2245.80  144.88
   1   5   3 2261.37  143.35
  -1   5  -4  441.21   56.56
   1  -5   4  485.73   61.57
  -1  -5  -4  413.74   80.75
   1   5   4  360.71   77.39
   1   5   4  485.79   53.93
  -1   5  -4  448.47   44.77
  -1   5  -4  515.15   50.16
   1  -5   4  375.01   43.70
  -1  -5  -4  483.23   46.57
   1   5   4  463.28   45.26
  -1   5  -5 1183.49   91.49
   1  -5   5  935.94   73.14
  -1  -5  -5 1043.61  125.19
   1   5   5 1286.62  141.15
   1   5   5 1219.02   88.74
  -1   5  -5 1177.63   79.46
   1  -5   5 1243.68   91.53
   1   5   5 1103.40   79.61
  -1   5  -5 1255.54   87.98
   1  -5   5 1160.52   79.34
   1   5   5 1258.12   85.30
  -1   5  -6  793.41   69.53
   1  -5   6  893.87   84.08
  -1  -5  -6  841.40  119.22
   1   5   6  713.99   78.22
  -1   5  -6  769.66   55.98
   1  -5   6  939.74   79.80
   1   5   6  742.48   55.82
   1  -5   6  827.41   67.72
   1   5   6  677.15   56.39
  -1   5  -7 1195.38   93.73
   1  -5   7 1028.36   85.09
  -1  -5  -7  960.97  125.84
   1   5   7  878.65   87.89
  -1   5  -7  767.84   42.41
   1  -5   7 1321.43   91.01
  -1  -5  -7 1105.73   82.86
   1   5   7  934.13   69.71
  -1   5  -7  974.42   66.08
   1  -5   7 1044.70   71.39
   1   5   7 1003.61   73.27
  -1   5  -8  820.05   77.08
   1  -5   8  879.31   81.28
  -1  -5  -8  689.35  112.67
   1   5   8  647.88  103.78
  -1   5  -8  859.38   66.10
   1  -5   8  830.98   69.18
  -1  -5  -8  601.06   58.55
  -1   5  -8  901.59   76.41
  -1  -5  -8  843.12   74.71
   1   5   8  821.95   70.94
  -1   5  -8  820.56   67.44
   1  -5   8  843.26   69.65
   1   5   8  878.93   81.05
  -1   5  -9 3112.90  232.57
   1  -5   9 4309.16  317.90
  -1  -5  -9 3142.71  274.69
  -1   5  -9 3921.28  285.13
   1  -5   9 3826.75  277.86
  -1  -5  -9 3734.75  289.53
  -1   5  -9 4087.75  297.64
  -1  -5  -9 3887.37  311.09
   1   5   9 3875.58  283.61
   1  -5   9 3562.45  261.26
  -1   5  -9 4037.77  292.74
   1  -5   9 3824.18  277.41
   1   5   9 3335.69  277.79
  -1   5 -10  374.27   60.13
   1  -5  10  430.69   60.39
  -1   5 -10  445.61   55.90
   1  -5  10  432.33   58.70
  -1  -5 -10  379.13   57.99
  -1   5 -10  407.53   61.06
   1   5  10  328.64   54.30
   1  -5  10  318.94   39.89
   1   5  10  385.73   50.58
  -1   5 -10  430.40   52.76
   1  -5  10  379.43   50.79
  -1  -5 -10  415.76   50.81
   1   5  10  332.51   47.07
  -1   5 -11  581.49   70.21
   1  -5  11  493.61   63.94
   1  -5  11  534.30   61.59
  -1  -5 -11  382.17   72.84
  -1  -5 -11  463.09   57.45
  -1   5 -11  498.26   55.18
   1   5  11  424.22   54.68
   1  -5  11  532.38   66.23
  -1   5 -11  494.37   51.09
   1   5  11  544.92   49.10
  -1   5 -11  433.80   49.45
   1  -5  11  541.79   61.02
  -1  -5 -11  466.84   47.73
  -1   5 -12 3940.36  367.94
   1  -5  12 5532.59  512.68
  -1   5 -12 4856.55  448.81
   1  -5  12 4398.21  403.82
  -1  -5 -12 3762.58  397.98
  -1  -5 -12 4023.48  382.41
  -1   5 -12 4706.49  433.46
   1   5  12 4369.64  409.97
   1  -5  12 4154.78  382.60
  -1   5 -12 4801.22  440.18
   1   5  12 4734.13  435.02
  -1   5 -12 4334.35  398.72
   1  -5  12 4963.07  455.82
  -1  -5 -12 3706.23  343.22
  -1   5 -13  842.37   93.80
   1  -5  13 1087.39  118.00
   1   5  13  732.41  117.87
  -1   5 -13  991.90  105.58
   1  -5  13 1058.75  108.39
  -1  -5 -13  775.84  115.14
  -1  -5 -13  833.16   98.51
  -1   5 -13  890.33   92.63
   1   5  13  971.19  131.41
   1  -5  13 1066.71  117.13
  -1   5 -13  944.55   97.87
   1   5  13 1167.73  114.48
  -1   5 -13 1044.86  105.27
   1  -5  13 1154.16  115.68
  -1  -5 -13  956.99  103.35
  -1   5 -14   63.29   52.63
   1  -5  14  132.59   60.62
   1   5  14   67.19   56.67
  -1   5 -14   71.24   47.81
   1  -5  14   79.62   39.11
  -1  -5 -14   27.25   33.18
  -1  -5 -14   58.73   40.06
  -1   5 -14   91.26   49.19
   1   5  14   72.62   51.70
   1  -5  14   90.58   42.24
  -1   5 -14   89.25   39.65
   1   5  14  100.93   39.95
  -1   5 -14   32.75   34.13
   1  -5  14  131.06   47.82
  -1  -5 -14   97.27   44.99
  -1   5 -15  371.48   69.60
  -1  -5 -15  285.81   68.62
   1  -5  15  401.27   58.80
   1   5  15  243.13   60.47
  -1   5 -15  377.79   60.86
   1  -5  15  438.35   61.48
  -1  -5 -15  244.20   48.36
  -1  -5 -15  250.11   51.79
  -1   5 -15  355.21   57.07
   1   5  15  373.66   58.61
   1   5  15  340.65   56.56
   1  -5  15  439.43   61.09
  -1   5 -15  292.39   39.88
   1   5  15  373.43   50.96
  -1   5 -15  320.39   50.18
   1  -5  15  409.32   54.88
  -1  -5 -15  297.18   48.69
  -1   5 -16  246.96   53.27
  -1  -5 -16  227.13   58.16
   1  -5  16  397.98   69.31
  -1   5 -16  365.81   48.14
  -1  -5 -16  210.91   65.29
   1  -5  16  404.26   52.57
  -1  -5 -16  253.80   45.32
  -1   5 -16  283.36   46.35
   1   5  16  250.05   44.73
   1   5  16  225.59   51.92
   1  -5  16  362.10   47.16
  -1   5 -16  344.83   54.90
   1   5  16  307.42   46.44
  -1   5 -16  331.78   49.09
   1  -5  16  363.76   50.71
  -1  -5 -16  304.95   51.03
  -1   5 -17   74.67   49.51
  -1  -5 -17  -32.20   60.05
   1  -5  17   77.79   57.04
  -1   5 -17   67.63   44.70
  -1  -5 -17   45.41   36.83
   1  -5  17  129.45   49.55
  -1   5 -17   59.86   45.89
   1   5  17   88.45   38.55
   1  -5  17   88.37   39.46
   1   5  17   90.16   46.43
  -1   5 -17   64.46   40.14
  -1  -5 -17   22.11   46.34
  -1   5 -18  374.68   55.45
  -1  -5 -18  377.71   73.72
   1  -5  18  602.11   89.10
  -1   5 -18  524.34   73.10
  -1  -5 -18  341.52   61.69
   1  -5  18  483.15   69.79
   1   5  18  312.69   51.71
   1  -5  18  593.94   77.93
   1   5  18  485.45   67.32
  -1   5 -18  502.05   72.26
  -1  -5 -18  381.45   51.19
  -1   5 -19   47.64   54.83
  -1  -5 -19   35.86   64.14
   1  -5  19   86.25   59.95
  -1   5 -19   57.34   44.34
  -1  -5 -19    7.22   50.94
   1   5  19   62.75   49.54
   1  -5  19   89.75   49.91
   1   5  19   25.59   54.14
  -1   5 -19   56.47   42.57
  -1  -5 -19   38.40   44.51
  -1   5 -20 1767.39  216.64
  -1  -5 -20 1112.93  162.27
   1  -5  20 1711.35  213.44
  -1   5 -20 1519.81  176.87
  -1  -5 -20  872.20  129.44
   1   5  20 1146.06  157.72
   1  -5  20 1893.04  218.95
   1   5  20 1410.53  167.54
  -1   5 -20 1590.49  187.60
  -1  -5 -20 1233.29  156.94
  -1   5 -21  119.34   62.20
  -1  -5 -21   65.69   67.91
  -1   5 -21   93.11   48.66
  -1  -5 -21   56.85   44.38
   1   5  21  103.13   56.14
   1  -5  21  122.89   53.19
   1   5  21  109.67   54.96
  -1   5 -21   81.07   48.88
  -1  -5 -21   81.80   43.54
  -1   5 -22   75.28   59.98
  -1  -5 -22  -19.51   72.88
  -1   5 -22   99.52   43.75
  -1  -5 -22   61.03   53.89
   1   5  22   37.92   59.89
   1  -5  22   79.68   42.84
   1   5  22   53.09   49.60
  -1   5 -22   70.68   49.44
  -1  -5 -22   84.29   42.66
  -1   5 -23   61.00   53.52
  -1  -5 -23   84.60   66.43
  -1   5 -23   62.79   47.61
  -1  -5 -23   48.92   45.58
   1   5  23   33.44   59.30
   1  -5  23   24.49   42.30
   1   5  23   15.10   35.30
  -1   5 -23   25.51   52.40
  -1  -5 -23   73.59   49.73
  -1   5 -24  306.59   71.51
  -1  -5 -24  514.03   96.55
  -1   5 -24  434.86   63.76
   1   5  24  245.65   55.26
   1  -5  24  407.67   46.81
   1   5  24  294.15   52.78
  -1   5 -24  458.86   75.33
  -1  -5 -24  301.14   59.99
  -1   5 -25  104.34   69.77
  -1  -5 -25   60.66   77.95
  -1   5 -25   34.54   61.53
   1  -5  25   85.93   54.98
   1   5  25   82.36   53.92
  -1   5 -25   51.74   50.02
  -1  -5 -25   65.09   60.67
  -1   5 -26  -60.88   67.12
  -1  -5 -26  -32.88   81.40
  -1   5 -26  -24.09   50.73
   1  -5  26    7.53   55.83
   1   5  26   56.50   58.54
  -1   5 -26  -27.74   52.06
  -1  -5 -26   -9.41   53.00
  -1   5 -27   -3.21   72.92
  -1  -5 -27   46.09   70.33
  -1   5 -27   -4.81   54.88
   1  -5  27   14.65   51.56
   1   5  27  -26.55   62.88
  -1   5 -27  -44.48   51.57
  -1  -5 -27   -3.17   58.80
  -1   5 -28    3.41   78.10
  -1  -5 -28  155.22   73.76
  -1   5 -28  116.99   71.13
   1  -5  28   68.54   65.91
   1   5  28  171.42   58.20
  -1   5 -28  155.73   50.07
  -1  -5 -28   79.24   60.68
  -1   5 -29   12.90   65.56
  -1  -5 -29   14.60   77.80
  -1   5 -29   44.85   67.56
   1  -5  29  -41.86   58.91
   1   5  29   -2.96   67.57
  -1   5 -29    1.81   55.71
  -1  -5 -29  -29.04   62.05
  -1  -5 -30   -3.61   94.60
  -1   5 -30  -12.32   55.22
   1  -5  30   76.70   58.99
   1   5  30   24.42   63.67
  -1   5 -30   12.82   58.99
  -1  -5 -30  -11.89   65.78
   1  -6 -30  126.73   89.74
   1   6 -30  102.36   76.27
  -1  -6  30  101.21   64.98
  -1   6  30   46.25   49.47
   1   6 -30  105.37   64.92
   1  -6 -30   75.48   69.61
   1  -6 -29  104.12   86.39
   1   6 -29    5.70   62.48
  -1  -6  29    1.38   53.95
  -1   6  29  -29.10   59.09
   1   6 -29   30.71   60.05
   1  -6 -29   -5.89   58.45
   1  -6 -28  135.10   77.67
   1   6 -28  190.73   57.48
  -1  -6  28  230.73   54.86
  -1   6  28  104.06   59.38
   1   6 -28  212.57   60.27
   1  -6 -28  124.08   68.38
   1  -6 -27   41.73   71.91
   1   6 -27   64.01   59.98
  -1  -6  27  -44.57   47.82
  -1   6  27   23.71   61.74
   1   6 -27  -17.92   55.02
   1  -6 -27  -10.95   52.19
   1   6 -26  768.81  127.30
   1  -6 -26  899.88  159.91
   1   6 -26 1115.98  174.05
   1  -6 -26  540.41  102.63
  -1  -6  26  922.11  138.61
  -1   6  26  741.32  131.50
   1   6 -26  890.54  137.67
   1  -6 -26  610.56  108.42
   1   6 -25   63.55   57.85
   1  -6 -25   63.23   65.03
   1   6 -25   80.96   52.62
   1  -6 -25   53.15   53.59
  -1  -6  25  124.13   46.51
  -1   6  25   85.08   47.78
   1   6 -25   89.50   42.03
   1  -6 -25   28.13   50.68
   1   6 -24  197.20   68.14
   1  -6 -24  161.49   58.04
   1   6 -24  240.99   61.42
   1  -6 -24  153.94   59.13
  -1  -6  24  188.13   56.70
  -1   6  24  102.69   55.61
   1   6 -24  170.10   47.66
   1  -6 -24  140.68   59.28
   1   6 -23   58.52   51.59
   1  -6 -23   50.57   65.11
   1   6 -23  -29.48   37.26
   1  -6 -23   61.52   52.30
  -1  -6  23    8.54   45.43
  -1   6  23   22.73   46.62
   1   6 -23   90.38   41.85
   1  -6 -23   36.23   55.55
   1   6 -22 1041.80  141.10
   1  -6 -22 1044.66  155.11
   1   6 -22  841.83  108.59
   1  -6 -22  737.24   96.31
  -1  -6  22 1244.75  153.86
  -1   6  22  785.52  118.38
   1   6 -22  960.45  123.35
   1  -6 -22  790.05  113.67
   1   6 -21   86.91   56.60
   1  -6 -21   71.17   79.37
   1   6 -21   42.33   57.90
   1  -6 -21   75.79   48.01
  -1  -6  21   53.79   57.61
  -1   6  21   42.78   43.87
   1   6 -21   37.16   41.99
   1  -6 -21   62.76   50.68
   1   6 -20  592.70   83.50
   1  -6 -20  461.26   87.38
  -1  -6  20  578.46   95.55
   1   6 -20  467.36   62.76
   1  -6 -20  366.39   57.93
  -1  -6  20  577.11   69.89
  -1   6  20  324.85   41.24
   1   6 -20  380.73   51.91
   1  -6 -20  392.92   66.65
   1   6 -19   20.88   60.25
   1  -6 -19  -34.74   47.36
  -1  -6  19   74.31   63.13
   1   6 -19   41.46   41.42
   1  -6 -19   28.21   51.85
   1   6 -19   43.17   50.63
  -1   6  19  -17.79   47.89
  -1  -6  19   12.27   40.58
  -1   6  19   90.54   45.60
   1   6 -19    3.97   44.55
   1  -6 -19   14.33   33.97
   1   6 -18 1678.98  166.15
   1  -6 -18 1143.06  157.19
  -1  -6  18 1821.57  184.06
   1   6 -18 1676.56  159.87
   1  -6 -18 1067.57  131.44
   1   6 -18 1825.12  173.96
  -1   6  18 1265.78  138.63
  -1  -6  18 1511.78  142.15
  -1   6  18 1394.16  143.04
   1   6 -18 1194.29  116.13
   1  -6 -18 1401.14  155.84
   1   6 -17 1599.91  186.72
   1  -6 -17 1352.71  189.76
  -1  -6  17 1762.07  217.19
   1   6 -17 1792.03  232.31
   1  -6 -17 1345.00  173.43
   1   6 -17 1744.23  197.26
  -1   6  17 1223.87  147.43
  -1  -6  17 1429.60  162.81
   1   6 -17 1405.76  158.18
  -1   6  17 1293.26  154.84
   1  -6 -17 1110.99  137.28
   1   6 -16  317.34   59.93
   1  -6 -16  334.52   68.59
  -1  -6  16  352.56   60.92
   1   6 -16  340.33   83.02
  -1   6  16  156.42   57.09
  -1   6  16  266.42   54.92
  -1  -6  16  345.41   61.05
   1   6 -16  393.88   53.58
  -1   6  16  313.36   43.50
   1  -6 -16  348.23   54.37
   1   6 -15   33.78   54.10
   1  -6 -15   59.99   44.98
  -1  -6  15   14.06   52.08
  -1   6  15   26.22   60.09
   1   6 -15   22.09   43.86
  -1  -6  15  102.22   59.12
  -1   6  15   24.56   44.14
  -1   6  15   71.24   42.60
  -1  -6  15   35.16   40.33
   1   6 -15   50.14   42.80
  -1   6  15   40.64   42.62
   1  -6 -15   14.29   42.05
  -1   6  15   65.36   45.51
   1   6 -14  365.98   55.09
   1  -6 -14  193.30   53.18
  -1  -6  14  343.77   59.63
  -1   6  14  167.11   66.66
   1   6 -14  321.71   43.52
  -1  -6  14  330.72   55.90
  -1   6  14  243.64   58.60
  -1   6  14  230.94   42.58
  -1  -6  14  294.26   42.22
   1   6 -14  239.47   45.42
  -1   6  14  318.73   45.87
   1  -6 -14  252.29   48.75
  -1   6  14  303.45   54.54
   1   6 -13   90.82   48.76
   1  -6 -13   58.74   39.74
  -1  -6  13  116.66   46.51
  -1   6  13   51.25   62.63
   1   6 -13  107.71   47.14
  -1  -6  13   70.57   49.74
   1  -6 -13   42.66   41.73
  -1   6  13   74.02   44.51
  -1   6  13  106.38   46.30
  -1  -6  13   90.43   38.73
   1   6 -13  154.26   40.51
  -1   6  13   82.71   39.79
  -1  -6  13   91.31   39.43
   1  -6 -13   81.63   35.10
  -1   6  13  109.92   44.76
   1   6 -12   19.40   33.69
  -1  -6  12    8.95   50.51
   1  -6 -12   12.57   46.73
  -1   6  12    6.24   53.32
   1   6 -12   12.85   34.09
  -1  -6  12   36.71   42.67
   1  -6 -12    7.96   41.38
  -1   6  12   15.61   38.37
  -1  -6  12    3.95   38.86
   1   6 -12    9.34   47.08
  -1   6  12   -1.61   29.18
  -1  -6  12    4.08   47.92
  -1   6  12  -60.21   42.35
   1   6 -11  -18.85   44.36
  -1  -6  11   27.25   50.98
  -1   6  11  -18.30   64.57
   1   6 -11  -16.44   32.50
  -1  -6  11  -29.70   44.02
   1  -6 -11   27.02   44.10
   1  -6 -11  -11.21   35.31
  -1   6  11  -10.02   37.75
  -1  -6  11   10.25   33.22
   1   6 -11   28.59   36.83
  -1  -6  11    3.44   46.78
  -1   6  11    0.37   41.44
   1   6 -10   35.04   50.71
  -1  -6  10   56.76   53.30
  -1   6  10  -48.15   52.73
   1  -6 -10   38.33   44.86
   1   6 -10   48.66   35.02
   1  -6 -10   46.17   55.09
   1  -6 -10   73.44   46.15
  -1   6  10   11.29   48.69
  -1  -6  10   34.90   41.91
   1   6 -10   50.87   40.30
  -1  -6  10    4.88   47.18
  -1   6  10   80.68   39.70
   1   6  -9 2692.43  211.98
   1  -6  -9 2390.43  190.45
   1  -6  -9 2309.28  188.94
   1  -6  -9 2664.35  216.85
  -1   6   9 2589.59  196.10
  -1  -6   9 2789.76  209.16
   1   6  -9 2980.01  222.86
   1   6  -9 2585.91  199.65
  -1  -6   9 2937.94  220.16
  -1   6   9 2057.91  161.71
   1   6  -8  776.42   79.69
   1  -6  -8  677.60   66.41
   1  -6  -8  716.37   74.80
   1  -6  -8  680.76   77.11
  -1   6   8  674.08   61.21
  -1  -6   8  553.81   46.45
   1   6  -8  770.59   67.76
   1   6  -8  714.04   59.62
  -1  -6   8  758.56   74.72
  -1   6   8  679.79   60.94
   1   6  -7  229.68  129.03
   1  -6  -7  215.53   45.84
  -1  -6   7  165.12   39.46
   1  -6  -7  237.95   49.40
   1  -6  -7  179.27   44.85
  -1   6   7  207.66   47.74
  -1  -6   7  279.34   40.62
   1   6  -7  250.88   51.53
   1   6  -7  150.23   31.24
  -1  -6   7  210.84   47.13
   1  -6  -6  218.16   64.38
   1  -6  -6  249.46   42.16
  -1  -6   6  290.76   50.63
   1  -6  -6  289.41   49.54
   1  -6  -6  252.86   45.71
  -1   6   6  266.92   46.39
  -1  -6   6  219.40   38.31
   1   6  -6  332.74   48.28
   1   6  -6  216.38   37.86
  -1  -6   6  298.25   48.41
   1  -6  -5 1199.02  133.64
  -1   6   5 1154.18  109.21
  -1  -6   5 1691.66  118.72
  -1   6   5 1412.76   92.83
   1  -6  -5 1470.05   96.62
   1   6  -5 1745.80  109.38
  -1  -6   5 1537.25   95.84
   1  -6  -5 1433.87  100.23
   1  -6  -5 1487.58  101.32
  -1   6   5 1481.25   97.07
  -1  -6   5 1468.09   90.76
   1   6  -5 1590.18  106.53
   1   6  -5 1382.28   86.01
  -1  -6   5 1358.86   84.19
   1  -6  -4   19.25   44.34
  -1  -6   4   -3.83   67.04
  -1   6   4    1.86   51.18
  -1   6   4    1.56   45.56
   1  -6  -4   -1.21   37.78
   1   6  -4   38.28   38.42
  -1  -6   4  -55.31   42.01
   1  -6  -4   -3.57   40.89
   1  -6  -4   20.16   37.38
  -1   6   4   -7.95   37.32
  -1  -6   4   18.17   33.12
   1   6  -4  -10.84   40.30
  -1  -6   4  -13.42   41.01
  -1  -6   3 1189.80  115.29
   1  -6  -3  792.62  109.85
  -1   6   3  953.46  100.89
   1   6  -3  949.73   92.96
  -1   6   3  933.83   76.39
   1  -6  -3  885.17   72.03
   1   6  -3 1095.52   82.43
  -1  -6   3 1103.73   82.59
   1  -6  -3  931.30   74.19
   1  -6  -3  879.30   68.57
  -1   6   3  830.07   63.30
  -1  -6   3  907.90   68.29
   1   6  -3  888.65   67.18
  -1  -6   3  731.01   41.50
   1  -6  -2 5973.35  282.15
  -1   6   2 5509.39  288.50
  -1   6   2 5617.91  201.00
   1  -6  -2 4540.18  172.40
   1   6  -2 5348.95  194.15
  -1  -6   2 5154.50  181.82
  -1   6   2 5041.28  183.89
   1  -6  -2 5497.24  193.24
   1  -6  -2 5574.54  197.24
  -1  -6   2 4874.93  171.61
  -1   6   2 5361.59  199.95
   1   6  -2 5594.33  196.52
  -1  -6   1  241.23   59.69
   1   6  -1  233.93   57.74
   1  -6  -1  276.24   51.02
  -1   6   1  235.34   53.83
  -1   6   1  208.34   40.23
   1  -6  -1  254.42   51.65
   1   6  -1  289.21   51.86
  -1  -6   1  214.49   43.69
  -1   6   1  208.40   36.59
   1  -6  -1  239.68   44.38
   1   6  -1  155.10   30.19
  -1  -6   1  200.51   36.13
   1  -6  -1  228.85   40.41
  -1   6   1  230.20   43.56
  -1  -6   0 5789.00  283.62
   1   6   0 5935.06  252.14
   1  -6   0 5918.94  224.55
  -1   6   0 6253.15  222.41
  -1   6   0 5171.57  184.64
   1  -6   0 6802.00  237.51
  -1  -6   0 6478.68  280.79
  -1   6   0 6593.28  226.01
   1  -6   0 6250.69  214.09
   1   6   0 6807.27  244.04
   1  -6   0 5799.16  201.10
  -1   6   0 5479.17  210.05
  -1  -6  -1  907.72  110.81
   1   6   1 1006.54  119.20
   1  -6   1  998.54   81.56
  -1   6  -1 1077.01   83.49
   1  -6   1 1087.32   84.39
   1   6   1  873.52   76.11
  -1  -6  -1  970.29   91.98
  -1   6  -1 1096.06   77.31
   1   6   1 1182.39   86.56
   1  -6   1 1100.26   79.61
  -1  -6  -1  795.49   47.39
   1  -6   1 1153.09   83.41
  -1   6  -1 1089.60   80.69
  -1  -6  -1 1083.81   78.61
   1  -6   2 6160.98  227.15
  -1  -6  -2 6504.76  366.64
   1   6   2 5803.56  310.47
   1  -6   2 5786.53  205.27
   1  -6   2 5261.29  188.71
  -1  -6  -2 5264.19  253.60
   1   6   2 6217.31  238.28
  -1   6  -2 6545.41  223.22
  -1  -6  -2 6413.69  233.09
   1  -6   2 5992.37  208.75
  -1   6  -2 6271.39  214.58
  -1  -6  -2 6630.96  235.72
   1  -6   3  832.47   77.62
  -1  -6  -3  893.07  125.99
   1   6   3  862.17  110.67
   1  -6   3  796.55   59.01
   1   6   3  566.17   54.65
  -1  -6  -3  467.46   63.47
   1   6   3  847.00   86.06
  -1  -6  -3  762.01   60.28
  -1   6  -3  656.46   43.20
   1  -6   3  797.22   51.80
  -1   6  -3  898.21   70.81
  -1  -6  -3  902.76   70.90
   1  -6   4 5302.74  204.55
  -1  -6  -4 4847.32  259.02
   1   6   4 4953.63  282.17
   1  -6   4 4980.97  184.70
   1   6   4 4572.91  219.81
  -1  -6  -4 3939.86  312.11
   1   6   4 4718.67  196.27
   1   6   4 4410.14  164.24
  -1   6  -4 5235.30  189.11
  -1  -6  -4 4844.03  218.86
   1   6   4 4199.58   97.35
  -1   6  -5 2979.32  189.30
   1  -6   5 3551.61  224.51
  -1  -6  -5 3151.97  289.69
   1   6   5 3192.94  252.32
   1   6   5 3267.04  199.74
  -1  -6  -5 2502.28  232.49
  -1   6  -5 2957.43  182.04
   1   6   5 2868.27  200.04
   1   6   5 3250.78  200.05
  -1   6  -5 3424.94  207.57
  -1  -6  -5 2970.97  195.82
   1   6   5 3236.84  206.28
  -1   6  -6 4130.43  124.28
   1  -6   6 4387.25  177.02
  -1  -6  -6 3557.42  312.12
   1   6   6 3972.53  277.97
  -1   6  -6 4111.49  106.41
   1  -6   6 4497.17  169.76
  -1  -6  -6 3428.64  222.68
   1   6   6 4199.97  111.66
  -1   6  -6 3937.02  235.11
   1  -6   6 4329.51  162.08
   1   6   6 4083.89  108.72
  -1   6  -7 1513.61  137.56
   1  -6   7 1539.32  137.39
  -1  -6  -7 1020.40  142.28
   1   6   7 1207.79  146.46
  -1   6  -7 1509.33  126.73
   1  -6   7 1605.11  131.61
  -1  -6  -7 1297.50  111.06
   1   6   7 1257.62  107.25
   1  -6   7 1274.53  106.91
   1   6   7 1307.54  110.63
  -1   6  -8  -33.07   55.05
   1  -6   8  -38.70   53.28
  -1  -6  -8   27.09   48.05
   1   6   8   17.04   66.00
  -1   6  -8   -9.29   22.26
   1  -6   8    2.95   43.28
  -1  -6  -8   -9.77   36.18
   1   6   8   -5.01   41.20
   1  -6   8   -7.71   40.69
   1   6   8    6.23   48.19
  -1   6  -9   68.56   55.40
   1  -6   9   93.81   52.00
  -1  -6  -9   98.20   58.07
   1   6   9   60.89   59.27
  -1   6  -9   72.38   37.08
   1  -6   9   73.29   48.14
  -1   6  -9   79.40   43.15
  -1  -6  -9   73.47   39.41
   1   6   9   94.63   44.36
  -1   6  -9   74.95   35.04
   1  -6   9  100.41   43.32
   1   6   9   69.99   34.02
  -1   6 -10 7375.15  674.56
   1  -6  10 7942.38  725.05
  -1  -6 -10 5219.22  534.73
   1   6  10 6064.67  597.52
  -1  -6 -10 4814.54  447.30
  -1   6 -10 8035.77  728.21
   1  -6  10 7614.23  689.47
  -1  -6 -10 5523.20  522.00
  -1   6 -10 8211.30  744.03
  -1  -6 -10 6393.67  588.90
   1   6  10 6848.72  628.25
   1  -6  10 6754.88  613.31
  -1   6 -10 7834.92  709.63
   1  -6  10 6813.84  617.08
   1   6  10 6280.84  577.08
  -1   6 -11 1413.06  128.64
   1  -6  11 1375.78  121.42
  -1  -6 -11 1032.17  137.38
  -1  -6 -11  979.57  106.39
  -1   6 -11 1245.40  106.06
   1  -6  11 1449.70  122.55
  -1  -6 -11 1084.13  106.50
  -1   6 -11 1251.23  107.00
   1   6  11 1189.10  108.97
   1  -6  11 1028.88   86.04
  -1   6 -11 1188.24  103.22
  -1   6 -11 1214.06  103.43
   1  -6  11 1319.15  110.63
  -1  -6 -11 1307.08  114.01
   1   6  11 1166.56  104.41
  -1   6 -12   34.97   61.91
   1  -6  12    7.39   58.32
  -1  -6 -12   36.85   36.86
  -1   6 -12   76.81   42.62
   1  -6  12   31.49   45.09
  -1  -6 -12   38.22   41.95
  -1  -6 -12   19.53   45.97
  -1   6 -12   35.30   45.86
   1   6  12   40.41   45.89
   1  -6  12   78.96   45.47
  -1   6 -12   64.53   45.19
   1   6  12   57.16   32.86
  -1   6 -12   35.23   34.20
   1  -6  12   32.26   47.54
  -1  -6 -12   38.53   32.23
   1   6  12   52.17   49.40
  -1   6 -13    5.74   46.17
   1  -6  13  -19.44   50.39
   1  -6  13    5.37   47.60
  -1  -6 -13   -9.24   40.39
  -1  -6 -13    5.25   52.08
  -1   6 -13   23.66   44.95
   1   6  13   32.76   42.87
   1  -6  13   19.49   54.72
  -1   6 -13    9.93   46.64
   1   6  13   11.66   36.29
  -1   6 -13   15.56   39.35
   1  -6  13   -4.68   39.76
  -1  -6 -13   36.37   42.12
  -1   6 -14  591.34   72.19
   1  -6  14  705.94   91.99
  -1   6 -14  667.13   75.26
   1  -6  14  679.05   75.76
  -1  -6 -14  449.20   69.01
  -1  -6 -14  659.99   81.00
  -1   6 -14  725.04   84.28
   1   6  14  610.44   74.83
   1  -6  14  717.21   78.30
  -1   6 -14  674.19   77.48
   1   6  14  539.98   64.34
  -1   6 -14  593.82   65.11
   1  -6  14  790.38   84.88
  -1  -6 -14  635.94   79.55
  -1   6 -15  210.56   52.45
   1  -6  15  224.88   64.98
   1   6  15  185.35   62.42
  -1   6 -15  172.27   41.19
   1  -6  15  170.08   42.90
  -1  -6 -15  119.80   41.37
  -1  -6 -15  150.90   50.79
  -1   6 -15  179.42   40.00
   1   6  15  159.86   44.27
   1  -6  15  214.29   48.59
  -1   6 -15  174.07   43.69
   1   6  15  184.82   38.87
  -1   6 -15  166.90   43.49
   1  -6  15  281.24   54.62
  -1  -6 -15  189.91   44.91
  -1   6 -16   11.03   45.66
   1  -6  16   -7.41   56.48
  -1   6 -16    7.05   47.75
   1  -6  16   -1.61   56.00
  -1  -6 -16   -1.42   38.60
  -1   6 -16  -29.60   53.39
   1   6  16   22.29   52.43
   1  -6  16  -45.58   34.81
   1   6  16    7.09   32.85
  -1   6 -16   33.78   43.31
  -1  -6 -16  -21.92   41.56
  -1   6 -17   67.81   43.34
  -1  -6 -17   96.81   62.34
   1  -6  17  113.66   64.26
  -1   6 -17   66.60   39.65
  -1  -6 -17   65.05   36.35
   1  -6  17   86.34   51.30
   1   6  17   50.66   37.52
   1  -6  17  130.68   36.59
   1   6  17   90.47   42.13
  -1   6 -17   82.58   48.23
  -1  -6 -17   71.84   43.37
  -1   6 -18  322.36   61.56
  -1  -6 -18  139.56   58.73
   1  -6  18  351.60   65.84
  -1   6 -18  331.90   53.40
  -1  -6 -18  195.11   55.87
   1   6  18  227.77   52.71
   1  -6  18  247.43   44.45
   1   6  18  262.75   44.04
  -1   6 -18  229.60   49.24
  -1  -6 -18  189.65   49.81
  -1   6 -19   24.31   60.00
  -1  -6 -19   15.53   54.25
   1  -6  19    8.92   71.02
  -1   6 -19  -41.36   46.22
  -1  -6 -19  -13.97   45.23
   1   6  19  -14.60   46.57
   1  -6  19    6.20   39.69
   1   6  19   42.80   51.81
  -1   6 -19   41.54   40.17
  -1  -6 -19   35.41   39.87
  -1   6 -20  331.62   69.35
  -1  -6 -20  197.83   57.62
   1  -6  20  329.13   63.33
  -1   6 -20  292.65   48.13
  -1  -6 -20  191.72   53.68
   1   6  20  188.58   58.20
   1  -6  20  301.15   46.38
   1   6  20  323.43   51.96
  -1   6 -20  321.46   58.33
  -1  -6 -20  248.78   58.10
  -1   6 -21  -10.24   53.20
  -1  -6 -21   19.72   67.56
  -1   6 -21   41.63   50.00
  -1  -6 -21    6.65   45.12
   1   6  21  -10.17   43.01
   1  -6  21  -23.56   35.55
   1   6  21   20.03   48.79
  -1   6 -21   41.80   44.92
  -1  -6 -21   18.91   42.07
  -1   6 -22 1164.83  151.69
  -1  -6 -22  920.76  148.02
  -1   6 -22 1204.84  146.70
  -1  -6 -22  761.39   88.88
   1   6  22  688.71   99.24
   1  -6  22 1335.31  162.56
   1   6  22  807.82  110.03
  -1   6 -22 1160.59  145.48
  -1  -6 -22  883.11  128.59
  -1   6 -23   79.93   68.86
  -1  -6 -23    0.09   66.06
  -1   6 -23   72.24   48.30
  -1  -6 -23   38.85   48.04
   1   6  23   56.47   53.28
   1  -6  23   48.15   46.60
   1   6  23   49.46   56.90
  -1   6 -23   -6.98   47.11
  -1  -6 -23   41.37   47.42
  -1   6 -24  243.70   87.90
  -1  -6 -24   73.87   77.49
  -1   6 -24  208.07   61.15
   1   6  24  108.89   56.93
   1  -6  24  241.94   57.24
   1   6  24  123.72   57.30
  -1   6 -24  137.81   52.07
  -1  -6 -24   79.36   49.10
  -1   6 -25   71.10   74.56
  -1  -6 -25  151.40   73.94
  -1   6 -25  230.68   58.27
   1  -6  25   99.21   54.38
   1   6  25  113.45   54.37
  -1   6 -25  143.82   44.61
  -1  -6 -25  147.60   51.29
  -1   6 -26  107.95   72.17
  -1  -6 -26   77.01   72.98
  -1   6 -26  131.56   69.44
   1  -6  26   85.24   57.16
   1   6  26  139.12   59.17
  -1   6 -26  201.82   58.34
  -1  -6 -26   86.34   58.25
  -1   6 -27    8.01   57.07
  -1  -6 -27   17.48   83.94
  -1   6 -27  -51.10   62.97
   1  -6  27   95.04   63.54
   1   6  27   82.41   48.16
  -1   6 -27   44.28   55.97
  -1  -6 -27  -63.94   67.69
  -1   6 -28   73.05   68.51
  -1  -6 -28  129.03   85.63
  -1   6 -28  117.53   55.10
   1  -6  28  188.13   67.14
   1   6  28  106.80   69.10
  -1   6 -28   67.64   62.64
  -1  -6 -28   83.87   64.31
  -1  -6 -29  -59.02   94.78
  -1   6 -29    3.03   62.03
   1  -6  29   32.78   40.98
   1   6  29   -2.39   61.95
  -1   6 -29   16.26   56.17
  -1  -6 -29   -7.81   50.89
  -1  -6 -30  174.39   88.85
   1  -6  30  276.70   73.60
   1   6  30  222.03   70.09
  -1   6 -30  245.71   58.61
  -1  -6 -30  177.52   70.16
   1  -7 -29   29.85   75.50
   1   7 -29   62.02   65.83
  -1  -7  29   30.78   65.00
  -1   7  29   30.53   55.51
   1   7 -29  -24.51   60.41
   1  -7 -29   27.55   63.67
   1  -7 -28   93.80   82.47
   1   7 -28   18.52   66.27
  -1  -7  28   28.89   56.66
  -1   7  28   12.09   60.45
   1   7 -28   49.80   59.24
   1  -7 -28   -3.79   60.81
   1  -7 -27   21.68   66.59
   1   7 -27   35.84   56.06
  -1  -7  27   79.60   57.56
  -1   7  27   31.78   60.37
   1   7 -27   24.32   60.13
   1  -7 -27   11.82   47.55
   1  -7 -26   -7.92   83.90
   1   7 -26   56.10   52.71
  -1  -7  26   16.57   64.16
  -1   7  26   51.54   58.33
   1   7 -26   23.54   56.53
   1  -7 -26  -14.67   57.17
   1  -7 -25   99.83   69.01
   1   7 -25   75.07   57.98
   1  -7 -25   60.46   45.15
  -1  -7  25   60.35   59.60
  -1   7  25   64.95   50.21
   1   7 -25   76.44   59.22
   1  -7 -25   42.30   55.99
   1   7 -24   64.17   64.48
   1  -7 -24  119.52   69.33
   1   7 -24  105.29   61.24
   1  -7 -24   97.77   52.24
  -1  -7  24  114.98   56.09
  -1   7  24   35.25   44.01
   1   7 -24   83.97   57.54
   1  -7 -24   40.59   59.09
   1   7 -23  181.31   58.82
   1  -7 -23  406.16   81.73
   1   7 -23  230.52   62.81
   1  -7 -23  128.88   60.74
  -1  -7  23  230.30   53.01
  -1   7  23  165.06   55.69
   1   7 -23  321.53   57.15
   1  -7 -23  174.36   53.05
   1   7 -22   25.01   60.68
   1  -7 -22    2.70   70.44
   1   7 -22  -22.83   45.82
   1  -7 -22   14.92   46.87
  -1  -7  22   27.70   47.32
  -1   7  22   28.52   55.80
   1   7 -22   16.10   52.32
   1  -7 -22  -22.90   53.94
   1   7 -21  485.48   68.90
   1  -7 -21  524.20   85.28
   1   7 -21  651.95   89.23
   1  -7 -21  394.75   64.40
  -1  -7  21  523.76   65.25
  -1   7  21  364.89   57.06
   1   7 -21  643.35   83.96
   1  -7 -21  358.33   56.92
   1   7 -20 1043.24  128.84
   1  -7 -20  804.69   97.47
   1   7 -20 1133.21  128.62
   1  -7 -20  709.08  103.77
  -1  -7  20 1018.34  117.85
  -1   7  20  819.93  100.08
   1   7 -20  846.07   99.82
   1  -7 -20  766.66   95.90
   1   7 -19  565.07   75.89
   1  -7 -19  477.68  105.29
  -1  -7  19  629.86   92.85
   1   7 -19  420.76   60.73
   1  -7 -19  403.02   64.00
  -1   7  19  217.62   72.66
  -1  -7  19  632.58   80.18
  -1   7  19  484.61   65.74
   1  -7 -19  423.12   60.23
   1   7 -18  100.67   50.60
   1  -7 -18  109.11   57.76
  -1  -7  18  133.00   75.81
   1   7 -18  156.39   41.29
   1  -7 -18   77.29   47.99
  -1   7  18   74.75   49.05
  -1   7  18  171.97   53.72
  -1  -7  18  204.52   51.50
  -1   7  18  115.97   45.39
   1  -7 -18  166.35   51.19
   1   7 -17  583.53   80.21
   1  -7 -17  582.91  110.56
  -1  -7  17  675.77   95.62
   1   7 -17  504.83   67.44
   1   7 -17  516.85   67.66
  -1   7  17  273.50   66.17
  -1   7  17  412.26   61.57
  -1  -7  17  547.87   73.28
  -1   7  17  577.80   72.31
   1  -7 -17  514.91   76.97
   1   7 -16  184.39   59.07
   1  -7 -16  166.36   62.49
  -1  -7  16  140.40   50.21
   1   7 -16  149.70   49.33
  -1   7  16   63.59   35.02
  -1   7  16  108.45   44.75
  -1  -7  16  140.24   50.13
   1   7 -16  123.36   49.67
  -1   7  16  155.77   40.43
   1  -7 -16   82.24   38.54
   1   7 -15  754.44   97.47
   1  -7 -15  669.48  102.16
  -1  -7  15  765.07  100.47
   1   7 -15  805.18   96.10
  -1   7  15  413.44   85.80
  -1   7  15  573.11   77.84
  -1  -7  15  702.66   86.57
   1   7 -15  762.98   91.06
  -1   7  15  558.43   70.72
   1  -7 -15  610.06   97.37
   1   7 -14    6.96   60.55
   1  -7 -14    5.49   55.11
  -1  -7  14    1.59   45.78
  -1   7  14   59.99   57.87
   1   7 -14   16.76   50.07
  -1  -7  14  -22.12   45.77
   1  -7 -14  -79.82   54.77
  -1   7  14   -1.20   39.09
  -1  -7  14   -4.63   46.95
   1   7 -14   -0.04   41.03
  -1   7  14   27.43   38.19
  -1  -7  14  -32.25   49.03
   1  -7 -14   10.56   38.45
  -1   7  14    8.90   42.18
   1   7 -13   12.47   46.50
  -1  -7  13  -12.96   51.73
  -1   7  13    6.41   60.29
   1  -7 -13   18.56   37.47
   1   7 -13   14.13   48.31
  -1  -7  13   23.97   50.72
   1  -7 -13   -2.88   44.06
  -1   7  13    7.83   28.79
  -1  -7  13   46.61   39.77
   1   7 -13   44.03   43.57
  -1   7  13   27.29   43.30
  -1  -7  13   17.98   40.48
  -1   7  13   35.98   42.99
   1   7 -12 1690.31  166.02
  -1  -7  12 1995.79  193.64
  -1   7  12 1322.87  170.05
   1  -7 -12 1419.22  154.03
   1   7 -12 1998.90  189.89
  -1  -7  12 2018.62  189.12
   1  -7 -12 1398.02  115.45
   1  -7 -12 1346.72  143.21
  -1   7  12 1528.44  158.86
  -1  -7  12 1722.62  163.42
   1   7 -12 1717.57  161.40
  -1  -7  12 1845.47  176.11
  -1   7  12 1256.32  123.48
   1   7 -11   88.05   52.80
  -1  -7  11  103.15   56.90
   1  -7 -11   71.12   46.31
   1   7 -11   75.45   64.52
   1  -7 -11   88.00   45.02
   1  -7 -11   68.18   45.73
  -1   7  11   42.98   38.15
  -1  -7  11   41.07   36.75
   1   7 -11   67.61   47.30
   1   7 -11   47.68   37.54
  -1  -7  11   92.62   40.02
  -1   7  11   36.04   40.68
   1   7 -10  216.24   47.63
   1  -7 -10  154.79   35.97
   1  -7 -10  219.84   44.23
   1  -7 -10  244.70   46.82
  -1   7  10  244.60   47.72
  -1  -7  10  249.47   44.35
   1   7 -10  216.10   47.00
   1   7 -10  206.61   37.06
  -1  -7  10  293.29   44.02
  -1   7  10  173.33   44.15
   1   7  -9  229.34   52.20
   1  -7  -9  135.20   41.15
   1  -7  -9  208.09   51.89
   1  -7  -9  218.78   42.93
  -1   7   9  278.17   46.20
  -1  -7   9  194.46   38.64
   1   7  -9  193.98   37.75
   1   7  -9  190.27   28.06
  -1  -7   9  214.22   46.98
   1   7  -8   40.71   37.49
   1  -7  -8   72.42   53.61
   1  -7  -8   60.36   39.40
   1  -7  -8   33.97   34.59
   1  -7  -8    5.29   38.94
  -1   7   8   16.53   42.86
  -1  -7   8   34.57   32.36
   1   7  -8   46.51   36.96
   1   7  -8   46.27   37.35
  -1  -7   8   65.94   45.26
   1  -7  -7  238.80   60.51
  -1   7   7  112.85   56.00
  -1  -7   7  171.52   35.61
   1  -7  -7  146.16   34.40
  -1  -7   7  204.07   52.39
   1  -7  -7  184.66   52.17
   1  -7  -7  197.16   44.39
  -1   7   7  176.75   39.63
  -1  -7   7  170.17   36.71
   1   7  -7  198.39   42.55
   1   7  -7  187.83   46.39
  -1  -7   7  216.98   45.16
   1  -7  -6   81.00   50.54
  -1   7   6  123.19   58.74
  -1  -7   6  142.25   67.37
   1  -7  -6   81.02   47.98
   1   7  -6  124.30   36.86
  -1  -7   6  154.77   43.94
   1  -7  -6  117.98   37.37
   1  -7  -6   86.02   41.51
  -1   7   6   92.79   38.30
  -1  -7   6   75.96   35.31
   1   7  -6  120.65   45.24
   1   7  -6  111.78   34.74
  -1  -7   6  124.37   40.36
   1  -7  -5  151.84   42.61
  -1   7   5  224.26   68.69
  -1  -7   5  193.30   68.89
  -1   7   5  210.04   42.32
   1  -7  -5  205.74   44.54
   1   7  -5  233.73   44.96
  -1  -7   5  223.28   54.68
   1  -7  -5  177.52   44.09
   1  -7  -5  238.37   42.28
  -1   7   5  158.16   34.02
  -1  -7   5  181.95   41.71
   1   7  -5  197.58   47.93
  -1  -7   5  176.65   46.24
   1  -7  -4   35.86   43.13
  -1  -7   4   35.48   85.04
  -1   7   4   23.12   46.97
  -1   7   4    4.93   37.32
   1  -7  -4   30.62   48.21
   1   7  -4    4.67   39.42
  -1  -7   4    8.07   44.02
   1  -7  -4   12.95   43.72
   1  -7  -4   21.35   33.90
  -1   7   4   28.50   34.38
  -1  -7   4   -2.93   41.19
   1   7  -4   60.82   44.51
  -1  -7   4   12.78   32.70
  -1  -7   3 2115.62  146.86
   1  -7  -3 1638.11  158.02
  -1   7   3 1572.12  126.37
   1   7  -3 2008.21  137.24
  -1   7   3 1833.52  123.12
   1  -7  -3 1578.46   95.73
   1   7  -3 2095.63  140.67
  -1  -7   3 2059.55  138.27
  -1   7   3 1994.78  142.81
   1  -7  -3 1812.36  126.13
   1  -7  -3 1887.34  129.56
  -1   7   3 1839.29  121.96
  -1  -7   3 1535.19   88.97
   1   7  -3 1803.65   68.95
  -1  -7   3 1809.32  119.11
  -1  -7   2   67.22   47.81
   1  -7  -2   67.52   52.64
  -1   7   2   30.14   47.89
   1   7  -2   22.49   48.09
  -1   7   2   33.77   38.50
   1  -7  -2   28.30   37.04
   1   7  -2   44.45   35.89
  -1  -7   2   27.10   39.65
  -1   7   2   31.67   37.59
   1  -7  -2    0.04   40.18
   1  -7  -2   30.26   31.70
  -1  -7   2   63.76   33.11
  -1   7   2   23.87   30.35
   1   7  -2   27.09   32.52
  -1  -7   1 9369.66  474.79
   1  -7  -1 8885.82  364.74
   1   7  -1 9083.99  311.58
  -1   7   1 8260.82  273.24
  -1   7   1 9502.37  307.00
   1  -7  -1 9739.15  315.94
  -1  -7   1 7533.34  292.60
   1   7  -1 9114.09  290.74
  -1  -7   1 8597.37  282.21
   1  -7  -1 8955.64  288.85
  -1   7   1 9599.34  328.57
  -1  -7   0 5073.92  316.92
   1   7   0 5805.68  238.27
   1  -7   0 5578.91  286.84
  -1   7   0 5171.65  188.04
  -1   7   0 4931.00  176.07
   1  -7   0 4984.95  178.42
   1   7   0 4883.80  196.96
  -1  -7   0 5157.74  206.38
  -1   7   0 5877.64  205.93
   1  -7   0 5686.17  200.67
   1   7   0 5595.62  195.36
  -1   7   0 4554.46  162.71
  -1  -7  -1 1077.14  120.14
   1   7   1 1096.04  101.13
   1  -7   1 1268.86  127.40
  -1   7  -1 1122.19   84.42
  -1   7  -1  994.11   69.34
   1   7   1  997.31   77.53
   1  -7   1 1170.59   82.19
  -1  -7  -1 1149.04   91.85
  -1   7  -1 1293.73   85.21
   1   7   1 1223.34   84.55
   1  -7   1 1067.22   77.78
  -1  -7  -1  933.74   64.60
   1  -7   1 1180.62   79.67
  -1   7  -1 1283.66   90.05
  -1  -7  -2 1391.05  138.43
   1   7   2 1974.18  174.65
   1  -7   2 1659.57  105.31
  -1   7  -2 1938.00  135.58
   1   7   2 1717.83  153.66
   1  -7   2 1810.80  123.00
  -1  -7  -2 1637.93  127.00
   1   7   2 1825.39  133.33
  -1   7  -2 2050.46  135.41
  -1  -7  -2 2015.55  140.40
   1  -7   2 1770.03  104.07
  -1   7  -2 1956.60  129.72
  -1  -7  -2 1876.47  128.20
   1  -7   3 3365.07  214.54
  -1  -7  -3 3266.71  293.46
   1   7   3 3128.12  243.59
   1  -7   3 3219.08  199.12
   1   7   3 2294.53  192.45
  -1  -7  -3 2736.12  217.42
   1   7   3 3321.84  210.47
  -1   7  -3 3739.36  223.60
  -1  -7  -3 3063.69  197.79
   1  -7   3 2707.97  162.96
  -1   7  -3 3808.38  228.82
  -1  -7  -3 3298.86  204.61
   1  -7   4 2725.10  180.02
  -1  -7  -4 2419.58  233.59
   1   7   4 2659.22  237.81
   1  -7   4 2751.08  174.61
   1   7   4 2297.36  203.35
  -1  -7  -4 1865.90  183.99
   1   7   4 2501.27  177.40
  -1  -7  -4 2362.86  167.87
  -1   7  -4 2194.98  136.04
   1   7   4 2444.96  154.41
   1  -7   4 2551.71  160.66
  -1   7  -4 2776.91  171.99
  -1  -7  -4 2334.49  151.07
   1  -7   5  378.16   58.85
  -1  -7  -5  338.16   84.20
   1   7   5  359.97   78.15
   1  -7   5  335.19   48.84
   1   7   5  297.52   39.75
  -1  -7  -5  217.39   57.99
   1   7   5  367.33   55.56
  -1  -7  -5  340.67   51.24
   1   7   5  368.63   53.95
  -1   7  -5  323.30   42.92
  -1  -7  -5  378.54   48.89
   1   7   5  396.24   54.41
  -1   7  -6  166.86   53.62
   1  -7   6  236.30   59.66
  -1  -7  -6  193.61   57.46
   1   7   6  126.04   62.03
   1   7   6  186.32   41.04
  -1  -7  -6  158.33   58.30
  -1   7  -6  229.39   44.95
   1   7   6  172.63   44.99
  -1  -7  -6  216.03   45.84
   1   7   6  162.34   42.17
  -1   7  -6  150.12   37.46
  -1  -7  -6  137.77   35.87
   1   7   6  207.75   46.61
  -1   7  -7  410.70   64.02
   1  -7   7  475.39   66.18
  -1  -7  -7  372.90   79.90
   1   7   7  318.99   85.27
  -1  -7  -7  234.48   65.12
  -1   7  -7  446.38   55.62
   1  -7   7  413.48   56.72
   1   7   7  349.00   49.87
  -1  -7  -7  403.66   52.95
   1   7   7  452.94   55.77
   1  -7   7  376.33   49.96
   1   7   7  391.17   51.88
  -1   7  -8  445.96   61.21
   1  -7   8  424.02   58.13
  -1  -7  -8  381.93   69.88
   1   7   8  439.09   75.91
  -1  -7  -8  287.21   61.97
  -1   7  -8  456.42   54.24
   1  -7   8  521.58   61.03
  -1  -7  -8  405.36   55.22
   1   7   8  430.12   56.00
   1  -7   8  505.02   55.95
   1   7   8  428.23   67.66
  -1   7  -9 4798.11  444.61
   1  -7   9 5600.63  516.92
  -1  -7  -9 4956.26  513.71
   1   7   9 4407.93  445.47
  -1  -7  -9 3037.10  324.76
  -1   7  -9 4253.58  389.45
   1  -7   9 6212.18  567.01
  -1  -7  -9 4303.18  417.92
   1   7   9 4786.56  448.03
   1  -7   9 5668.98  520.05
   1   7   9 4053.77  377.34
  -1   7 -10  -10.81   48.09
   1  -7  10   -3.55   64.43
  -1  -7 -10   15.86   43.09
   1   7  10   61.36   59.79
  -1  -7 -10   -0.59   41.24
  -1   7 -10  -12.14   41.93
   1  -7  10  -10.74   38.35
  -1  -7 -10  -31.42   44.79
   1   7  10  -15.53   42.73
   1  -7  10    2.27   34.76
  -1   7 -10   11.75   34.20
   1  -7  10   -5.57   42.11
   1   7  10   38.13   45.28
  -1   7 -11  507.23   59.61
   1  -7  11  537.95   59.80
  -1  -7 -11  286.11   79.77
   1   7  11  422.09   76.32
  -1  -7 -11  268.25   39.47
  -1   7 -11  476.54   53.38
   1  -7  11  495.30   53.63
  -1   7 -11  576.62   80.50
  -1  -7 -11  374.82   45.79
   1   7  11  429.73   54.81
   1  -7  11  419.95   43.91
  -1   7 -11  418.56   45.95
  -1   7 -11  483.61   44.10
   1  -7  11  512.91   56.04
   1   7  11  410.30   57.84
  -1   7 -12 2252.07  213.35
   1  -7  12 2670.48  247.88
  -1  -7 -12 1995.04  242.67
   1   7  12 1512.95  180.51
  -1  -7 -12 1707.02  174.06
  -1   7 -12 2496.03  239.24
   1  -7  12 2696.03  246.92
  -1  -7 -12 1699.72  168.24
  -1   7 -12 2324.57  215.70
  -1  -7 -12 1967.82  186.84
   1   7  12 1785.48  176.33
   1  -7  12 2338.38  214.38
  -1   7 -12 1994.99  182.40
  -1   7 -12 2350.28  213.20
   1  -7  12 2378.44  217.41
  -1  -7 -12 2143.81  203.94
   1   7  12 2151.58  218.14
  -1   7 -13  872.80   99.12
   1  -7  13  873.01   98.30
  -1  -7 -13  668.99  102.15
  -1  -7 -13  550.24   76.39
  -1   7 -13  820.00   84.91
   1  -7  13  937.74   94.67
  -1  -7 -13  501.17   45.21
  -1   7 -13  903.46   96.31
   1   7  13  664.93   82.36
   1  -7  13  822.02   87.87
  -1   7 -13  750.56   79.03
   1   7  13  788.00   85.84
  -1   7 -13  774.53   81.71
   1  -7  13  755.40   82.66
  -1  -7 -13  645.63  102.96
   1   7  13  618.78   72.11
  -1   7 -14  133.07   53.46
   1  -7  14  179.32   59.39
  -1  -7 -14   79.49   37.73
  -1   7 -14  184.50  116.34
   1  -7  14  178.49   44.57
  -1  -7 -14   60.54   41.63
  -1  -7 -14   93.88   43.47
  -1   7 -14  120.89   49.20
   1   7  14   80.97   41.55
   1  -7  14   90.28   44.68
  -1   7 -14  124.85   47.70
   1   7  14  112.61   46.03
  -1   7 -14  122.69   42.81
   1  -7  14   77.89   46.42
  -1  -7 -14  149.29   43.87
   1   7  14   60.38   40.38
  -1   7 -15  339.54   44.12
   1  -7  15  544.57   76.86
  -1  -7 -15  283.07   55.16
  -1   7 -15  538.52   97.40
   1  -7  15  481.07   56.88
  -1  -7 -15  317.00   63.89
  -1   7 -15  589.15   85.59
   1   7  15  382.53   61.93
   1  -7  15  529.40   69.73
   1   7  15  466.86   53.34
  -1   7 -15  414.49   51.38
  -1  -7 -15  366.08   64.20
  -1   7 -16  227.69   89.39
   1  -7  16  207.65   55.78
  -1  -7 -16  124.38   43.28
  -1   7 -16  245.16   52.62
  -1  -7 -16   75.93   42.31
   1  -7  16  180.16   73.19
   1   7  16  181.66   48.03
  -1   7 -16  135.12   53.98
  -1  -7 -16  130.22   39.94
  -1   7 -17 1100.75  135.05
   1  -7  17 1301.79  163.90
  -1  -7 -17  678.14   96.05
  -1   7 -17 1080.06  133.14
  -1  -7 -17  646.73  102.51
   1  -7  17  839.28   53.68
   1   7  17  931.19  112.85
  -1   7 -17 1104.28  129.82
  -1  -7 -17  892.62  115.54
  -1   7 -18  336.46   61.17
   1  -7  18  445.73   81.11
  -1   7 -18  368.18   52.51
  -1  -7 -18  210.56   51.41
   1   7  18  285.50   68.85
   1  -7  18  342.58   42.89
   1   7  18  282.02   47.94
  -1   7 -18  388.94   50.98
  -1  -7 -18  315.14   51.45
  -1   7 -19   30.15   52.64
  -1  -7 -19  -18.67   52.40
   1  -7  19    9.28   50.62
  -1   7 -19   29.41   50.78
  -1  -7 -19   51.42   52.48
   1   7  19   17.73   42.33
   1  -7  19   -8.47   38.67
   1   7  19   39.67   41.22
  -1   7 -19   70.84   44.86
  -1  -7 -19   34.86   51.76
  -1   7 -20  313.37   60.96
  -1  -7 -20  205.15   61.52
   1  -7  20  311.74   73.36
  -1   7 -20  297.10   57.38
  -1  -7 -20  168.88   41.45
   1   7  20  158.87   45.28
   1  -7  20  235.38   44.96
   1   7  20  199.49   47.78
  -1   7 -20  274.51   50.31
  -1  -7 -20  169.08   52.36
  -1   7 -21  483.56   71.86
  -1  -7 -21  367.42   67.85
  -1   7 -21  627.57   65.04
  -1  -7 -21  276.39   54.55
   1   7  21  321.53   63.06
   1  -7  21  496.73   56.98
   1   7  21  474.05   62.38
  -1   7 -21  498.94   61.04
  -1  -7 -21  475.69   67.46
  -1   7 -22  167.99   83.02
  -1  -7 -22  210.65   74.54
  -1   7 -22  133.81   61.85
  -1  -7 -22   45.46   58.28
   1   7  22   87.05   49.29
   1  -7  22  156.85   44.34
   1   7  22  143.02   52.82
  -1   7 -22  207.01   45.13
  -1  -7 -22   65.86   47.68
  -1   7 -23   92.47   75.40
  -1  -7 -23   59.81   63.22
  -1   7 -23  131.58   58.52
   1   7  23   11.90   71.55
   1  -7  23   89.13   40.35
   1   7  23    6.14   42.39
  -1   7 -23   75.93   45.79
  -1  -7 -23   76.46   50.31
  -1   7 -24  241.34   71.05
  -1  -7 -24  232.80   97.29
  -1   7 -24  225.44   61.63
   1  -7  24  147.92   42.52
   1   7  24  199.82   56.57
  -1   7 -24  247.77   57.29
  -1  -7 -24  154.97   45.55
  -1   7 -25   37.11   61.80
  -1  -7 -25   62.55   68.20
  -1   7 -25   66.68   53.44
   1  -7  25   38.21   60.62
   1   7  25   31.29   57.61
  -1   7 -25   35.31   45.91
  -1  -7 -25  -45.98   52.05
  -1   7 -26  -29.55   62.44
  -1  -7 -26   44.82   73.04
  -1   7 -26    0.82   57.16
   1  -7  26   12.37   51.33
   1   7  26    7.02   46.78
  -1   7 -26   66.99   56.87
  -1  -7 -26   53.36   55.14
  -1   7 -27    1.76   60.44
  -1  -7 -27   48.18   76.70
  -1   7 -27  100.48   54.91
   1  -7  27  175.68   65.95
   1   7  27   36.68   58.08
  -1   7 -27   94.97   74.45
  -1  -7 -27   31.92   64.96
  -1  -7 -28    9.07   77.62
  -1   7 -28   82.08   67.73
   1  -7  28   87.46   63.67
   1   7  28   49.38   53.65
  -1   7 -28  115.99   77.31
  -1  -7 -28  104.53   71.26
  -1  -7 -29   70.00   79.78
  -1   7 -29   69.30   57.40
   1  -7  29   18.36   67.02
   1   7  29   51.94   67.31
  -1   7 -29   45.78   42.58
  -1  -7 -29   33.66   55.71
   1  -8 -29  -31.02   76.20
   1   8 -29   40.55   68.26
  -1  -8  29   66.35   63.22
  -1   8  29    1.72   70.28
   1   8 -29   68.72   70.17
   1  -8 -29   69.58   56.68
   1  -8 -28   42.43   90.37
   1   8 -28  -53.04   60.41
  -1  -8  28  -23.24   64.14
  -1   8  28   21.67   65.71
   1   8 -28   91.41   65.44
   1  -8 -28  -20.27   52.98
   1  -8 -27  123.70   90.04
   1   8 -27  163.57   65.71
  -1  -8  27  173.17   67.10
  -1   8  27  105.78   63.65
   1   8 -27  145.78   54.43
   1  -8 -27   78.96   62.63
   1  -8 -26   22.06   89.10
   1   8 -26  -24.71   62.91
  -1  -8  26   42.53   59.40
  -1   8  26   48.22   59.03
   1   8 -26  -47.67   57.57
   1  -8 -26   48.63   60.02
   1  -8 -25  493.98   80.74
   1   8 -25  925.52  146.64
  -1  -8  25  808.24  131.99
  -1   8  25  479.07   65.46
   1   8 -25  687.36  113.11
   1  -8 -25  370.35   90.90
   1  -8 -24   29.78   74.62
   1   8 -24  -44.68   57.74
   1  -8 -24   15.22   55.95
  -1  -8  24   -8.28   63.40
  -1   8  24   16.40   52.48
   1   8 -24  -26.86   56.47
   1  -8 -24  -10.28   54.68
   1   8 -23  345.10   54.70
   1  -8 -23  402.77   84.40
   1   8 -23  419.94   61.85
   1  -8 -23  285.09   66.82
  -1  -8  23  418.37   62.41
  -1   8  23  227.16   44.91
   1   8 -23  435.46   57.08
   1  -8 -23  264.30   60.72
   1   8 -22   29.22   49.89
   1  -8 -22  117.83   73.04
   1   8 -22   24.69   53.19
   1  -8 -22    7.07   49.32
  -1  -8  22    4.59   54.68
  -1   8  22    2.75   52.18
   1   8 -22  -20.31   46.57
   1  -8 -22  -19.67   51.22
   1   8 -21  815.15  115.57
   1  -8 -21  702.17  109.03
   1   8 -21 1157.32  143.89
   1  -8 -21  707.13   95.51
  -1  -8  21 1039.60  134.12
  -1   8  21  812.59  118.07
   1   8 -21  963.01  123.45
   1  -8 -21  763.99   87.87
   1   8 -20   16.34   67.43
   1  -8 -20   -8.62   78.54
   1  -8 -20   -4.51   50.81
   1   8 -20   65.70   55.38
   1  -8 -20   40.61   45.80
  -1  -8  20   -4.24   51.87
  -1   8  20    8.75   38.88
   1  -8 -20  -14.52   46.77
   1   8 -19  370.01   69.24
   1  -8 -19  261.48   63.69
   1  -8 -19  230.41   61.56
   1   8 -19  504.24   66.97
   1  -8 -19  287.80   64.78
  -1   8  19  161.63   57.72
  -1  -8  19  433.99   56.41
  -1   8  19  331.10   55.33
   1  -8 -19  300.41   64.13
   1   8 -18  118.90   62.71
   1  -8 -18   97.18   68.47
  -1  -8  18   93.62   61.24
   1  -8 -18   42.20   48.69
   1   8 -18   85.72   65.81
  -1   8  18   18.97   36.65
  -1  -8  18   39.57   51.14
  -1   8  18  128.26   41.44
   1  -8 -18   19.94   37.30
   1   8 -17 1398.74  136.54
   1  -8 -17 1273.69  161.07
  -1  -8  17 1874.75  191.23
   1  -8 -17  831.32  109.88
   1   8 -17 1786.57  169.05
  -1   8  17  727.33  105.34
  -1   8  17 1214.97  142.07
  -1  -8  17 1593.05  149.88
  -1   8  17 1210.19  125.37
   1  -8 -17 1278.01  136.19
   1   8 -16  138.07   59.37
   1  -8 -16   69.55   52.49
  -1  -8  16  173.83   56.39
   1  -8 -16   77.23   50.34
   1   8 -16  169.93   51.12
  -1   8  16  102.26   51.14
  -1   8  16   76.43   32.55
  -1   8  16  153.28   41.25
   1  -8 -16  201.27   50.21
   1   8 -15   97.14   57.46
  -1  -8  15  104.25   51.32
   1  -8 -15   56.30   45.43
   1   8 -15   93.54   52.56
  -1   8  15   41.41   42.64
  -1  -8  15   61.11   36.95
   1   8 -15  112.99   51.91
  -1   8  15   86.94   40.14
   1  -8 -15   67.91   44.29
   1   8 -14   16.16   51.06
  -1  -8  14   61.95   58.21
   1  -8 -14   10.18   41.02
   1   8 -14  -10.63   44.75
  -1   8  14    0.35   46.95
  -1  -8  14   37.83   39.81
   1   8 -14   13.49   46.40
  -1   8  14    6.15   42.26
   1   8 -13 1164.86  146.41
  -1  -8  13 1210.10  147.94
   1  -8 -13  783.74   87.06
   1   8 -13 1282.43  149.16
  -1  -8  13 1348.44  154.21
   1  -8 -13  874.20  110.31
   1  -8 -13  867.16   87.25
  -1   8  13  886.95   87.46
  -1  -8  13 1078.80  126.55
   1   8 -13 1127.57  131.04
  -1  -8  13 1304.34  149.13
  -1   8  13  808.20   75.86
   1   8 -12   -0.08   48.08
   1  -8 -12   -2.28   46.46
   1  -8 -12  -13.65   37.42
   1  -8 -12    9.80   37.95
  -1   8  12  -23.78   37.63
  -1  -8  12   52.34   41.24
   1   8 -12  -21.95   44.49
   1   8 -12   -4.07   23.87
  -1  -8  12  -46.33   39.22
  -1   8  12  -27.56   43.17
   1   8 -11  546.56   69.89
   1  -8 -11  438.33   52.83
   1  -8 -11  310.11   58.92
   1  -8 -11  476.10   63.21
  -1   8  11  444.72   50.49
  -1  -8  11  593.34   71.19
   1   8 -11  484.59   51.32
   1   8 -11  536.22   47.18
  -1  -8  11  514.35   52.45
   1   8 -10   54.97   48.53
   1  -8 -10   31.74   48.54
   1  -8 -10   19.58   38.96
   1  -8 -10   64.78   42.86
   1  -8 -10   33.03   35.04
  -1   8  10   48.44   42.32
  -1  -8  10   58.83   42.61
   1   8 -10    0.12   38.53
   1   8 -10   46.27   33.75
  -1  -8  10   44.35   42.42
   1   8  -9  157.21   52.41
   1  -8  -9  120.80   53.29
  -1   8   9   59.28   44.31
   1  -8  -9   80.95   36.20
   1  -8  -9  150.43   43.93
   1  -8  -9  133.03   42.65
  -1   8   9  173.82   40.95
  -1  -8   9  164.43   42.44
   1   8  -9  194.51   48.01
   1   8  -9  211.71   40.67
  -1  -8   9  162.86   46.25
   1  -8  -8  -15.88   49.82
  -1   8   8    7.63   59.56
  -1  -8   8   33.09   39.74
   1  -8  -8   11.86   38.07
  -1  -8   8    5.94   50.17
   1  -8  -8  -11.88   39.70
   1  -8  -8  -25.83   38.69
  -1   8   8  -20.18   43.49
  -1  -8   8   24.73   28.89
   1   8  -8    0.81   39.74
   1   8  -8    6.74   31.83
  -1  -8   8    8.35   36.66
   1  -8  -7 1683.39  206.10
  -1   8   7 2018.39  228.94
  -1  -8   7 1786.99  142.45
   1  -8  -7 1624.67  154.89
   1   8  -7 1968.06  192.64
  -1  -8   7 1919.10  185.87
   1  -8  -7 1933.66  199.69
   1  -8  -7 1613.82  134.35
  -1   8   7 1793.99  139.84
  -1  -8   7 1917.26  184.24
   1   8  -7 2146.68  207.91
  -1  -8   7 2240.61  215.87
   1  -8  -6   64.96   49.46
  -1   8   6   25.41   44.52
  -1  -8   6   62.00   54.05
  -1   8   6   37.93   36.88
   1  -8  -6   30.65   37.22
   1   8  -6   17.82   38.95
  -1  -8   6   72.98   43.36
   1  -8  -6   16.96   42.34
   1  -8  -6   28.98   36.00
  -1   8   6   57.67   41.14
  -1  -8   6   48.69   37.23
   1   8  -6   22.98   34.95
  -1  -8   6   59.09   39.76
   1  -8  -5   83.45   47.17
  -1  -8   5   67.83   55.05
  -1   8   5   53.51   46.79
  -1   8   5   33.94   44.09
   1  -8  -5   37.89   39.68
   1   8  -5   42.62   37.20
  -1  -8   5   28.73   49.78
   1  -8  -5   16.81   39.95
   1  -8  -5   63.05   42.59
  -1   8   5   35.05   39.74
  -1  -8   5   46.06   32.83
   1   8  -5   11.96   37.84
  -1  -8   5   15.94   41.38
  -1  -8   4 1077.36  127.07
   1  -8  -4  891.41  124.75
  -1   8   4 1042.67  132.18
  -1   8   4  900.39   71.71
   1  -8  -4  751.34   67.88
   1   8  -4  935.08   70.68
  -1  -8   4 1047.67   99.85
  -1   8   4  819.02   88.82
   1  -8  -4  849.61   67.90
   1  -8  -4  914.23   70.65
  -1   8   4  827.02   64.86
  -1  -8   4  906.71   65.48
   1   8  -4  957.48   57.72
  -1  -8   4  674.80   50.04
  -1  -8   3  137.36   46.01
   1  -8  -3  142.44   42.34
  -1   8   3   79.99   47.66
   1   8  -3  120.41   44.67
  -1   8   3  149.50   47.72
   1  -8  -3   93.27   34.10
   1   8  -3  146.67   41.37
  -1  -8   3  119.07   48.14
  -1   8   3  144.87   50.05
   1  -8  -3  123.70   41.26
   1  -8  -3  105.04   32.81
  -1  -8   3  114.37   36.80
  -1   8   3  124.27   46.81
   1   8  -3  122.76   33.42
  -1  -8   3  116.42   40.16
  -1  -8   2  155.41   57.70
   1  -8  -2  148.30   61.84
  -1   8   2  171.01   59.56
   1   8  -2  192.54   45.92
  -1   8   2  175.21   42.35
   1  -8  -2  142.97   40.17
   1   8  -2  189.74   45.08
  -1  -8   2  150.65   43.02
  -1   8   2  161.11   43.90
   1  -8  -2  175.64   44.39
   1   8  -2  143.29   38.83
   1  -8  -2  110.76   37.38
  -1  -8   2  179.25   37.94
  -1   8   2  188.23   43.10
  -1  -8   1 1126.50  145.50
   1  -8  -1  924.52  100.83
   1   8  -1 1082.24   98.42
  -1   8   1  880.67   70.47
  -1   8   1 1117.02   97.07
   1  -8  -1 1211.00  109.05
   1   8  -1 1150.46  106.44
  -1  -8   1 1154.89  126.06
  -1   8   1 1023.39   91.22
   1  -8  -1 1038.31   93.32
   1   8  -1 1124.39   97.96
  -1  -8   1  911.08   66.42
   1  -8  -1 1003.30   87.62
  -1   8   1 1012.17   89.50
  -1  -8   0 4860.25  424.42
   1   8   0 5087.95  388.91
   1  -8   0 3712.30  323.24
  -1   8   0 4413.35  320.05
  -1   8   0 4837.91  348.84
   1  -8   0 4689.42  341.00
   1   8   0 4267.28  338.10
  -1  -8   0 4553.80  339.33
  -1   8   0 3654.89  263.55
   1   8   0 4651.97  334.86
   1  -8   0 4890.16  351.54
   1  -8   0 4409.47  321.42
  -1   8   0 3704.72  265.93
  -1  -8  -1 2105.81  211.45
   1   8   1 2428.60  216.53
   1  -8   1 2328.44  152.49
  -1   8  -1 2371.88  183.91
  -1   8  -1 2148.36  161.84
   1   8   1 2442.27  276.04
   1  -8   1 2439.49  185.71
  -1  -8  -1 2140.90  195.61
  -1   8  -1 2636.51  197.94
   1   8   1 2392.32  182.99
   1  -8   1 1903.70  142.95
   1  -8   1 2368.52  179.98
  -1   8  -1 2517.76  190.20
  -1  -8  -2   36.88   43.74
   1   8   2  -15.98   50.28
   1  -8   2  -21.20   38.99
  -1   8  -2   -7.83   43.72
  -1   8  -2  -14.99   33.48
   1   8   2  -29.12   39.87
   1  -8   2   -3.60   46.49
  -1  -8  -2   -5.66   34.35
  -1   8  -2   18.42   35.71
   1   8   2   13.61   33.98
  -1  -8  -2    8.15   35.64
   1  -8   2   -3.14   29.95
  -1   8  -2  -41.54   39.94
  -1  -8  -2   18.79   33.15
   1   8   3   26.80    2.02
   1  -8   4 1167.22  115.12
  -1  -8  -4  873.54  127.10
   1   8   4  951.75  102.46
   1  -8   4 1041.34   97.40
   1   8   4  804.99   98.82
  -1  -8  -4  893.14  125.31
   1  -8   4  853.95   65.17
   1   8   4  875.57   63.62
  -1  -8  -4 1055.50  105.78
  -1   8  -4  819.85   56.56
   1   8   4  945.89   73.14
   1  -8   4  794.24   55.78
  -1   8  -4 1118.40  100.06
  -1  -8  -4 1084.66  106.72
   1  -8   5 3100.65  240.96
  -1  -8  -5 2791.41  270.14
   1   8   5 2631.12  242.86
   1  -8   5 2625.85  211.22
   1   8   5 2537.07  270.72
  -1  -8  -5 2011.33  240.80
   1   8   5 3003.45  230.93
  -1  -8  -5 2478.41  199.70
  -1  -8  -5 2158.19  182.74
   1   8   5 2875.52  215.00
  -1   8  -5 3316.16  247.35
  -1  -8  -5 2617.19  226.20
   1  -8   6 1274.32  119.45
  -1  -8  -6 1045.70  153.13
   1   8   6  941.68  101.13
   1  -8   6  853.95   63.55
   1   8   6 1028.24   91.83
  -1  -8  -6  857.96  134.72
   1   8   6 1131.48  111.03
  -1  -8  -6 1039.23  104.36
  -1  -8  -6 1049.52   97.91
   1   8   6 1102.90   97.60
  -1   8  -6 1162.13  102.24
  -1  -8  -6  859.04   68.40
   1   8   6 1019.81   89.37
  -1   8  -7 1232.20  113.91
   1  -8   7 1201.32  113.22
  -1  -8  -7  851.68  119.45
   1   8   7  943.80  125.94
   1   8   7 1165.85  103.69
  -1  -8  -7  832.82  130.68
  -1   8  -7 1196.55  101.72
   1   8   7 1097.32  106.87
  -1  -8  -7 1037.70  106.18
  -1  -8  -7  939.92  101.70
   1   8   7 1009.59   92.08
  -1   8  -7  994.86   89.19
  -1  -8  -7  992.28   98.86
   1   8   7  985.07   89.78
  -1   8  -8  847.67   87.14
   1  -8   8  918.22   88.43
  -1  -8  -8  864.02  117.05
   1   8   8  682.47   98.80
  -1  -8  -8  453.00   77.47
  -1   8  -8  967.35   89.79
   1  -8   8 1048.36   99.61
   1   8   8  892.06  103.36
  -1  -8  -8  908.00  105.31
   1   8   8  926.21   87.18
   1  -8   8  794.38   79.46
   1   8   8  927.44   89.80
  -1   8  -9  449.17   57.61
   1  -8   9  496.97   62.10
  -1  -8  -9  339.71   78.00
   1   8   9  451.36   69.07
  -1  -8  -9  250.43   58.10
  -1   8  -9  493.40   52.13
   1  -8   9  584.44   57.14
   1   8   9  404.71   54.78
  -1  -8  -9  466.10   49.43
   1   8   9  424.71   48.20
   1  -8   9  534.57   57.93
   1   8   9  397.73   46.47
  -1   8 -10  127.29   54.84
   1  -8  10  125.26   50.33
  -1  -8 -10  141.21   68.17
   1   8  10   89.02   57.66
  -1  -8 -10  100.99   51.02
  -1   8 -10  149.07   44.47
   1  -8  10  150.87   48.63
  -1  -8 -10  122.25   38.63
   1   8  10  108.47   45.83
   1  -8  10  183.76   43.89
   1   8  10  128.07   38.91
  -1   8 -11 3503.93  317.98
   1  -8  11 3620.10  324.83
  -1  -8 -11 2305.24  276.75
   1   8  11 2915.30  291.56
  -1  -8 -11 2462.65  287.91
  -1   8 -11 2406.68  212.82
   1  -8  11 3749.51  333.02
  -1  -8 -11 3087.99  297.50
   1   8  11 3030.69  283.23
   1  -8  11 3256.68  289.68
   1  -8  11 3547.56  313.37
   1   8  11 3154.48  292.11
  -1   8 -12    5.78   47.72
   1  -8  12   21.26   54.08
  -1  -8 -12  -42.94   56.12
   1   8  12  -17.19   59.35
  -1  -8 -12  -19.76   35.11
   1  -8  12   26.02   46.12
  -1   8 -12   36.86   57.88
  -1  -8 -12   -7.09   36.19
   1   8  12  -14.67   30.26
   1  -8  12   -3.24   38.52
  -1   8 -12   -5.40   39.85
  -1   8 -12   -2.09   41.88
   1  -8  12  -24.67   37.12
   1   8  12    4.97   46.77
  -1   8 -13 1575.31  182.59
   1  -8  13 1980.56  223.23
  -1  -8 -13 1324.65  182.14
   1   8  13 1360.00  192.47
  -1  -8 -13 1164.93  164.26
  -1   8 -13 1642.36  184.09
   1  -8  13 1751.51  194.22
  -1   8 -13 1674.30  187.11
  -1  -8 -13 1388.35  166.29
   1   8  13 1381.59  168.67
   1  -8  13 1551.95  180.67
  -1   8 -13 1500.40  165.96
  -1   8 -13 1414.22  155.77
   1  -8  13 1774.92  197.53
  -1  -8 -13 1146.17  138.76
   1   8  13 1374.56  169.44
  -1   8 -14  278.30   67.41
   1  -8  14  294.19   55.54
  -1  -8 -14  288.93   76.19
  -1  -8 -14  182.58   55.39
  -1   8 -14  211.55   56.21
   1  -8  14  258.40   45.58
  -1   8 -14  289.77   55.30
   1   8  14  210.23   50.53
   1  -8  14  236.78   38.58
   1   8  14  239.54   50.69
  -1   8 -14  277.06   47.98
  -1  -8 -14  161.56   57.16
  -1   8 -15  195.89   59.16
   1  -8  15  236.12   54.21
  -1  -8 -15  149.56   74.78
  -1  -8 -15  140.78   41.20
  -1   8 -15  234.55   53.91
  -1  -8 -15  117.01   44.71
   1  -8  15  157.50   37.29
   1   8  15  175.88   40.75
  -1   8 -15  231.99   52.48
  -1  -8 -15  111.09   36.30
  -1   8 -16   21.13   59.14
   1  -8  16   -2.28   57.79
  -1  -8 -16   11.30   38.79
  -1   8 -16   28.99   67.60
  -1  -8 -16   23.82   38.62
   1  -8  16   84.54   61.32
   1   8  16  -20.08   47.09
  -1   8 -16   11.44   44.09
  -1  -8 -16    6.54   36.78
  -1   8 -17  271.47   61.54
   1  -8  17  245.67   70.16
  -1  -8 -17  142.71   41.62
  -1   8 -17  268.22   52.40
  -1  -8 -17  138.66   50.02
   1  -8  17  280.57   53.35
   1   8  17  301.78   56.83
  -1   8 -17  255.59   45.77
  -1  -8 -17  210.89   48.72
  -1   8 -18   12.30   57.83
   1  -8  18   36.77   68.12
  -1  -8 -18  -24.36   46.09
  -1   8 -18  -10.96   45.47
  -1  -8 -18   15.43   43.63
   1  -8  18   15.77   50.53
   1   8  18   29.88   46.02
  -1   8 -18  -14.42   65.56
  -1  -8 -18  -30.31   40.01
  -1   8 -19  664.20   87.37
   1  -8  19  719.33   93.53
  -1   8 -19  584.73   76.25
  -1  -8 -19  428.96   74.06
   1   8  19  435.84   61.94
   1  -8  19  646.96   80.53
   1   8  19  457.61   59.18
  -1   8 -19  660.81   76.70
  -1  -8 -19  336.65   60.82
  -1   8 -20   79.35   52.71
  -1  -8 -20   59.98   53.76
   1  -8  20  123.98   74.61
  -1   8 -20   46.71   47.44
  -1  -8 -20   67.87   59.93
   1   8  20   85.70   57.23
   1  -8  20   81.95   49.42
   1   8  20   99.41   46.83
  -1   8 -20   93.46   49.48
  -1  -8 -20   94.65   53.58
  -1   8 -21  246.15   55.69
  -1  -8 -21  264.94   66.94
  -1   8 -21  332.34   56.55
  -1  -8 -21  168.79   46.04
   1   8  21  212.52   56.13
   1  -8  21  453.31   65.40
   1   8  21  287.44   50.93
  -1   8 -21  332.98   54.58
  -1  -8 -21  264.64   77.45
  -1   8 -22  139.21   52.99
  -1  -8 -22   35.09   58.77
  -1   8 -22   32.79   55.77
   1   8  22   16.67   50.40
   1  -8  22  143.02   57.16
   1   8  22  102.40   50.92
  -1   8 -22   85.99   45.87
  -1  -8 -22   57.49   44.79
  -1   8 -23  733.92   88.99
  -1  -8 -23  768.86  132.84
  -1   8 -23  959.44  137.75
   1   8  23  367.92   71.32
   1  -8  23  986.14  141.81
   1   8  23  608.38   81.93
  -1   8 -23  845.88  123.22
  -1  -8 -23  618.84   90.55
  -1   8 -24   44.54   49.07
  -1  -8 -24    1.09   74.79
  -1   8 -24   33.96   57.71
   1  -8  24   84.38   53.49
   1   8  24   33.73   52.13
  -1   8 -24   17.82   56.16
  -1  -8 -24   33.64   64.63
  -1   8 -25  320.26   63.05
  -1  -8 -25  302.94   85.54
  -1   8 -25  450.20   75.37
   1  -8  25  593.16  107.33
   1   8  25  260.15   57.55
  -1   8 -25  536.25   95.31
  -1  -8 -25  252.04   58.56
  -1   8 -26   67.21   59.27
  -1  -8 -26   99.41   78.04
  -1   8 -26   71.89   56.08
   1  -8  26   32.91   50.85
   1   8  26   96.18   58.71
  -1   8 -26   36.17   53.00
  -1  -8 -26   71.10   56.55
  -1  -8 -27   95.95   93.64
  -1   8 -27   29.73   54.28
   1  -8  27  -35.63   51.08
   1   8  27  -14.49   37.72
  -1   8 -27   10.57   56.94
  -1  -8 -27   27.89   58.79
  -1  -8 -28   -7.39   72.04
  -1   8 -28   22.71   63.80
   1  -8  28    0.95   53.39
   1   8  28    1.14   61.90
  -1   8 -28   -3.67   48.91
  -1  -8 -28   35.84   59.38
  -1  -8 -29   47.82   83.04
  -1   8 -29  118.84   70.69
   1  -8  29   87.59   66.09
   1   8  29   19.69   62.67
  -1   8 -29   65.25   64.64
  -1  -8 -29  -16.55   75.05
   1  -9 -28  452.48   87.73
   1   9 -28  251.75   62.78
  -1  -9  28  244.16   69.35
  -1   9  28  180.83   70.59
   1   9 -28  253.24   70.42
   1  -9 -28  104.15   62.21
   1  -9 -27   30.64   87.15
   1   9 -27  102.00   64.72
  -1  -9  27   99.51   64.76
  -1   9  27   22.47   61.69
   1   9 -27   69.81   74.63
   1  -9 -27  102.44   62.28
   1  -9 -26    3.11   70.41
   1   9 -26   27.31   56.19
  -1  -9  26  -25.04   57.77
  -1   9  26   -3.43   61.80
   1   9 -26   25.26   48.82
   1  -9 -26   65.05   61.05
   1  -9 -25  -62.15   71.65
   1   9 -25  108.04   57.87
  -1  -9  25  143.70   59.20
  -1   9  25   73.10   51.97
   1   9 -25   97.99   54.00
   1  -9 -25   59.95   54.79
   1  -9 -24  963.04  169.81
   1   9 -24  951.21  151.00
   1  -9 -24  501.72  107.74
  -1  -9  24 1022.88  156.27
  -1   9  24  548.77   98.23
   1   9 -24  890.13  135.35
   1  -9 -24  556.77  109.75
   1  -9 -23  583.36  121.87
   1   9 -23  868.49  118.83
   1  -9 -23  468.24   73.17
  -1  -9  23  833.96  115.23
  -1   9  23  499.75   75.62
   1   9 -23  754.96  101.09
   1  -9 -23  519.18   77.82
   1   9 -22   31.53   71.15
   1  -9 -22  -38.46   63.04
   1   9 -22   37.10   60.63
   1  -9 -22   27.22   51.43
  -1  -9  22    1.91   47.54
  -1   9  22   -8.42   59.16
   1   9 -22  -41.26   52.01
   1  -9 -22  -34.44   47.02
   1   9 -21  254.66   54.69
   1  -9 -21  249.37   65.54
   1   9 -21  431.43   64.02
   1  -9 -21  222.06   55.86
  -1  -9  21  398.32   54.95
  -1   9  21  276.01   55.83
   1  -9 -21  276.69   57.30
   1   9 -20 1436.67  156.81
   1  -9 -20 1797.22  219.55
   1   9 -20 2328.16  240.75
   1  -9 -20 1253.26  165.28
  -1  -9  20 2030.05  213.10
  -1   9  20 1602.24  186.53
   1  -9 -20 1441.85  170.81
   1   9 -19  240.83   77.72
   1  -9 -19  135.09   56.64
   1  -9 -19  114.08   52.10
   1   9 -19  320.34  103.93
  -1   9  19  104.65   45.06
  -1   9  19  136.94   40.67
   1  -9 -19  135.27   44.62
   1   9 -18  -12.77   63.94
   1  -9 -18   42.46   69.92
   1  -9 -18   -8.56   43.09
   1   9 -18   68.10   48.06
  -1   9  18   -3.49   43.77
  -1  -9  18   -4.68   49.56
  -1   9  18   29.91   44.90
   1  -9 -18   31.31   37.22
   1   9 -17  713.17   94.78
   1  -9 -17  458.94   90.13
  -1  -9  17  647.00   83.39
   1  -9 -17  400.48   70.95
   1   9 -17  710.44   82.87
  -1   9  17  335.92   75.09
  -1   9  17  538.77   71.25
  -1  -9  17  644.70   75.45
  -1   9  17  502.60   68.89
   1  -9 -17  484.79   78.93
   1   9 -16  102.78   50.55
  -1  -9  16  177.26   61.73
   1  -9 -16   64.21   41.77
   1   9 -16  147.64   51.16
  -1   9  16   83.48   48.45
  -1  -9  16   98.21   66.97
  -1   9  16  128.96   44.09
   1  -9 -16  104.86   44.82
   1   9 -15 1220.94  146.24
  -1  -9  15 1312.38  154.79
   1  -9 -15  948.50  135.63
   1   9 -15 1500.66  175.13
  -1   9  15  994.83  128.19
  -1  -9  15 1335.54  150.74
  -1   9  15 1184.65  143.62
   1   9 -14  107.93   55.78
  -1  -9  14   90.44   52.53
   1  -9 -14   20.28   44.42
   1  -9 -14   49.72   40.71
  -1   9  14    1.90   42.19
  -1  -9  14  138.19   40.69
   1   9 -14   77.13   53.84
   1   9 -13   99.16   52.06
   1  -9 -13   85.92   50.98
   1   9 -13  122.59   41.50
   1  -9 -13   35.23   51.24
   1  -9 -13   92.72   45.16
  -1   9  13   84.10   47.20
  -1  -9  13  137.03   45.04
   1   9 -13  137.53   52.26
   1   9 -13  102.42   40.73
   1   9 -12 1855.36  223.73
   1  -9 -12 1321.38  173.94
   1  -9 -12 1157.71  145.83
   1  -9 -12 1765.24  212.88
  -1   9  12 1422.41  165.66
  -1  -9  12 1862.22  205.32
   1   9 -12 1858.21  204.57
   1   9 -12 1909.55  210.73
  -1  -9  12 2121.36  231.19
   1   9 -11  403.88   52.49
   1  -9 -11  367.82   68.53
  -1   9  11  264.71   72.03
   1  -9 -11  260.92   43.63
   1  -9 -11  270.74   49.55
   1  -9 -11  351.96   47.69
  -1   9  11  401.10   47.43
  -1  -9  11  506.52   50.38
   1   9 -11  510.01   55.10
   1   9 -11  518.67   55.31
  -1  -9  11  492.86   54.77
   1  -9 -10   -1.78   50.79
  -1   9  10   -0.17   65.22
  -1  -9  10   23.38   42.86
   1  -9 -10   36.79   43.56
   1  -9 -10   39.69   40.75
   1  -9 -10   30.42   42.67
  -1   9  10   38.74   42.72
  -1  -9  10   63.21   41.02
   1   9 -10   43.10   43.87
   1   9 -10    6.49   29.51
  -1  -9  10   -9.18   46.66
   1  -9  -9  480.50   78.07
  -1   9   9  471.51   81.30
  -1  -9   9  443.48   50.89
   1  -9  -9  417.95   58.93
  -1  -9   9  475.71   62.30
   1  -9  -9  408.35   61.92
   1  -9  -9  390.18   46.34
  -1   9   9  329.08   40.31
  -1  -9   9  375.52   39.60
   1   9  -9  403.82   41.26
  -1  -9   9  545.47   54.29
   1  -9  -8  921.95  125.83
  -1   9   8 1104.69  134.53
  -1  -9   8 1046.55   95.43
   1  -9  -8  912.09   96.06
   1   9  -8 1044.54   94.03
  -1  -9   8 1120.74   98.11
   1  -9  -8  837.22   92.90
   1  -9  -8  943.29   97.96
  -1   9   8  906.46   84.75
  -1  -9   8 1060.67   92.30
   1   9  -8 1078.04   91.71
  -1  -9   8 1075.96   98.57
   1  -9  -7   15.59   51.62
  -1   9   7  -46.77   43.87
  -1  -9   7   28.16   49.35
   1  -9  -7    7.93   37.47
   1   9  -7   35.15   42.49
  -1  -9   7   -5.89   42.09
   1  -9  -7  -13.55   29.46
   1  -9  -7   -2.88   29.75
  -1   9   7    5.78   37.10
  -1  -9   7   10.84   38.55
   1   9  -7   35.42   41.07
  -1  -9   7  -26.42   29.10
   1  -9  -6  129.68   54.18
  -1  -9   6  205.11   47.82
  -1   9   6  196.49   51.21
  -1   9   6  164.55   45.54
   1  -9  -6  167.32   36.79
   1   9  -6  170.30   38.84
  -1  -9   6  246.66   52.05
   1  -9  -6  123.34   40.84
   1  -9  -6  129.90   48.87
  -1   9   6  160.34   38.00
  -1  -9   6  163.40   36.14
   1   9  -6  199.70   43.61
  -1  -9   6  206.58   42.71
   1  -9  -6  170.20   42.31
   1  -9  -5  174.54   55.07
  -1  -9   5  176.67   46.31
  -1   9   5  161.47   49.00
  -1   9   5  204.75   46.06
   1  -9  -5  141.26   37.39
   1   9  -5  246.04   48.93
  -1  -9   5  205.50   50.43
   1  -9  -5  208.15   44.59
   1  -9  -5  199.87   46.97
  -1   9   5  195.96   43.55
  -1  -9   5  155.19   31.20
   1   9  -5  198.22   45.54
  -1  -9   5  202.85   40.68
   1  -9  -5  176.40   33.56
  -1  -9   4   24.85   47.82
   1  -9  -4   12.55   53.39
  -1   9   4   13.67   58.78
  -1   9   4   22.76   36.18
   1  -9  -4   41.71   38.37
   1   9  -4   47.11   41.10
  -1  -9   4    9.91   36.18
  -1   9   4   56.30   44.05
   1  -9  -4    2.56   40.72
   1  -9  -4   33.14   33.85
  -1   9   4   37.84   36.84
  -1  -9   4   29.29   25.35
   1   9  -4   -8.64   47.06
  -1  -9   4   50.86   42.78
  -1  -9   3  101.69   58.05
   1  -9  -3  112.49   57.09
  -1   9   3   65.06   45.20
   1   9  -3   83.82   43.70
  -1   9   3  118.27   42.96
   1  -9  -3   78.33   41.45
   1   9  -3   70.48   28.64
  -1  -9   3  103.47   44.49
  -1   9   3   65.71   40.93
   1  -9  -3   88.49   40.22
   1   9  -3   67.65   27.56
   1  -9  -3   69.10   34.23
  -1  -9   3   67.58   35.65
  -1   9   3   92.81   41.34
   1   9  -3   95.88   33.22
  -1  -9   3  111.70   32.65
  -1  -9   2   28.14   44.78
   1  -9  -2   11.74   47.89
  -1   9   2   44.65   45.14
   1   9  -2   60.11   48.70
  -1   9   2   48.17   33.19
   1  -9  -2   84.31   46.86
   1   9  -2   57.16   36.72
  -1  -9   2   13.45   42.65
  -1   9   2   26.49   34.76
   1  -9  -2   56.05   35.49
   1   9  -2   51.97   30.40
   1  -9  -2   43.76   27.03
  -1  -9   2   78.96   32.33
  -1   9   2   19.07   31.94
  -1  -9   1  821.47  113.82
   1  -9  -1  728.98   98.53
   1   9  -1  701.54   75.10
  -1   9   1  636.59   73.79
  -1   9   1  847.95   66.67
   1  -9  -1  776.01   69.69
   1   9  -1  729.66   66.06
  -1  -9   1  783.85   93.31
  -1   9   1  649.11   58.28
   1  -9  -1  779.36   65.37
   1   9  -1  697.13   56.70
   1  -9  -1  633.81   53.89
  -1   9   1  636.25   56.52
  -1  -9   0 7753.00  599.14
   1  -9   0 7881.16  629.65
   1   9   0 7269.08  556.68
  -1   9   0 7865.52  574.19
  -1   9   0 7366.53  518.89
   1   9   0 5119.76  386.23
   1  -9   0 7077.88  498.17
  -1  -9   0 7978.59  580.12
  -1   9   0 6061.02  426.80
   1   9   0 9494.06  666.29
   1  -9   0 5552.71  395.08
   1  -9   0 7027.85  493.93
  -1   9   0 6350.19  447.04
  -1  -9  -1  671.99   95.87
   1   9   1  776.70   89.44
   1  -9   1  702.54  107.38
  -1   9  -1  740.15   71.14
  -1   9  -1  690.73   56.94
   1   9   1  679.00  102.40
   1  -9   1  692.71   62.26
  -1  -9  -1  626.65   76.64
  -1   9  -1  769.83   62.90
   1   9   1  741.48   67.75
   1  -9   1  537.86   48.72
  -1   9  -1  734.93   65.12
  -1  -9  -2  325.15   63.32
   1   9   2  292.94   57.51
   1  -9   2  324.46   73.26
  -1   9  -2  315.18   46.31
  -1   9  -2  414.38   51.83
   1   9   2  232.05   56.09
   1  -9   2  390.73   59.28
  -1  -9  -2  265.13   50.48
   1   9   2  366.46   48.19
  -1   9  -2  410.72   53.57
  -1  -9  -2  302.93   40.99
   1  -9   2  354.45   46.35
  -1   9  -2  398.91   55.34
  -1  -9  -2  302.71   44.24
   1  -9   3  209.87   66.27
  -1  -9  -3  243.79   54.84
   1   9   3  146.74   31.58
  -1  -9  -3  229.81   63.97
   1   9   3   10.20    1.63
   1  -9   4 1138.08  109.95
  -1  -9  -4 1024.02  139.70
   1   9   4 1053.66  138.60
   1  -9   4 1086.26  115.89
   1   9   4  789.17   89.95
  -1  -9  -4  679.50   92.18
   1  -9   4 1453.93  126.74
   1   9   4 1002.99   98.83
  -1  -9  -4 1076.83  112.98
  -1   9  -4 1197.36   99.78
   1   9   4 1054.31   94.89
   1  -9   4 1044.35   91.28
  -1   9  -4 1262.30  108.38
  -1  -9  -4 1101.77  124.68
   1  -9   5  728.88   68.21
  -1  -9  -5  717.91  107.97
   1   9   5  656.82   93.22
   1  -9   5  807.62   86.96
   1   9   5  626.16  101.73
  -1  -9  -5  472.36   71.40
   1   9   5  644.96   50.23
  -1  -9  -5  803.95   91.36
  -1   9  -5  846.64   79.49
  -1  -9  -5  511.54   40.64
   1   9   5  732.02   53.18
   1  -9   5  544.15   41.34
  -1   9  -5  841.37   78.73
  -1  -9  -5  615.50   68.66
   1  -9   6   63.01   49.74
  -1  -9  -6   -4.90   48.75
   1   9   6  -42.60   51.33
   1  -9   6   16.40   41.12
   1   9   6   -0.59   33.12
  -1  -9  -6   12.54   34.11
   1   9   6   24.38   44.58
  -1  -9  -6  -11.25   37.82
  -1  -9  -6  -13.56   35.66
   1   9   6   24.47   41.29
  -1   9  -6   34.50   43.89
  -1  -9  -6   38.94   33.40
   1  -9   7   96.15   59.99
  -1  -9  -7   16.30   47.52
   1   9   7   27.73   61.61
   1  -9   7   70.33   41.90
   1   9   7   39.11   35.36
  -1  -9  -7   34.15   38.56
   1   9   7   75.70   46.83
  -1  -9  -7   23.21   46.68
  -1  -9  -7   33.56   35.25
   1   9   7   66.44   39.84
  -1   9  -7   47.78   41.69
  -1  -9  -7   12.21   32.82
   1  -9   8 6881.26  600.54
  -1  -9  -8 5007.83  487.31
   1   9   8 4937.40  464.64
   1  -9   8 6656.62  580.23
  -1  -9  -8 3666.19  395.25
  -1   9  -8 6572.06  569.06
   1   9   8 5683.55  511.64
  -1  -9  -8 5385.22  485.22
  -1  -9  -8 5690.40  506.92
   1   9   8 5791.68  508.31
  -1  -9  -8 6091.44  559.40
   1   9   8 5895.30  512.77
  -1   9  -9 4058.17  364.68
   1  -9   9 3837.28  342.33
  -1  -9  -9 3052.84  334.94
   1   9   9 3384.71  349.99
  -1   9  -9 3870.95  341.57
   1  -9   9 4578.23  401.89
   1   9   9 3780.19  356.49
  -1  -9  -9 3212.79  305.88
  -1  -9  -9 3450.61  327.22
   1   9   9 3494.02  317.50
   1  -9   9 3924.33  345.55
   1   9   9 3540.36  319.77
  -1   9 -10   94.78   54.70
   1  -9  10  110.71   52.11
  -1  -9 -10   49.73   60.69
   1   9  10   75.47   67.36
  -1  -9 -10   47.11   26.03
  -1   9 -10  148.06   52.05
   1  -9  10  167.75   48.92
   1   9  10  105.60   42.56
  -1  -9 -10   25.45   49.13
  -1  -9 -10   96.53   38.66
   1   9  10   75.85   44.61
   1  -9  10  131.67   43.46
   1   9  10  115.82   45.35
  -1   9 -11 2578.26  262.64
   1  -9  11 2502.90  250.31
  -1  -9 -11 2156.13  260.54
   1   9  11 2160.23  251.98
  -1  -9 -11 1491.92  197.22
  -1   9 -11 2984.01  295.20
   1  -9  11 2651.98  262.57
  -1  -9 -11 2150.68  246.42
   1   9  11 2185.48  229.33
   1  -9  11 2520.52  250.74
   1  -9  11 2917.57  289.28
   1   9  11 2389.05  245.68
  -1   9 -12 3116.07  339.48
   1  -9  12 3679.44  393.41
  -1  -9 -12 2180.59  281.67
   1   9  12 2560.92  310.00
  -1  -9 -12 1613.32  226.21
  -1   9 -12 2641.76  280.88
   1  -9  12 3530.16  374.58
  -1  -9 -12 2629.56  299.56
   1   9  12 2581.76  288.56
   1  -9  12 3014.42  320.45
  -1   9 -12 3063.53  326.33
   1  -9  12 3024.38  321.40
   1   9  12 2715.77  311.10
  -1   9 -13   68.06   48.93
   1  -9  13  107.01   51.23
  -1  -9 -13   82.57   49.42
  -1  -9 -13   39.13   40.65
   1  -9  13  117.84   57.77
  -1   9 -13   95.07   54.69
  -1  -9 -13   41.62   38.83
   1   9  13   54.25   48.28
  -1   9 -14 1002.10  118.41
   1  -9  14 1154.85  145.82
  -1  -9 -14  908.39  138.82
  -1  -9 -14  501.85   76.29
  -1   9 -14  655.76   72.49
  -1  -9 -14  688.81  100.07
   1  -9  14 1034.14  129.04
  -1  -9 -14  581.68   76.22
  -1   9 -15   58.84   52.45
   1  -9  15   23.45   55.24
  -1  -9 -15   40.36   61.66
  -1  -9 -15   -8.15   40.14
   1   9  15   83.35   45.23
  -1   9 -15   75.36   57.25
  -1  -9 -15   15.08   40.88
  -1   9 -16 2006.41  191.94
   1  -9  16 2290.44  213.40
  -1  -9 -16 1320.92  166.17
  -1  -9 -16 1258.65  151.20
  -1   9 -16 2167.47  203.68
  -1  -9 -16 1287.66  163.74
   1  -9  16 2291.06  212.31
   1   9  16 1716.04  171.82
  -1   9 -16 1742.44  158.51
  -1  -9 -16 1408.18  152.73
  -1   9 -17  235.77   63.75
   1  -9  17  270.98   70.96
  -1  -9 -17   77.61   63.84
  -1  -9 -17  100.66   43.24
  -1   9 -17  233.05   48.06
  -1  -9 -17  165.33   58.56
   1  -9  17  267.85   64.04
   1   9  17  172.55   45.74
  -1   9 -17  254.52   47.42
  -1  -9 -17  137.55   41.00
  -1   9 -18   71.99   62.33
   1  -9  18   65.93   64.50
  -1   9 -18   77.57   50.02
  -1  -9 -18   60.79   46.81
   1  -9  18   54.63   43.09
   1   9  18   23.99   49.50
  -1   9 -18   55.26   50.85
  -1  -9 -18   24.27   45.63
   1  -9  19   26.33   69.76
  -1   9 -19   20.69   47.27
  -1  -9 -19   30.38   47.85
   1  -9  19   39.90   72.81
   1   9  19   24.03   45.76
  -1   9 -19    0.70   76.10
  -1  -9 -19   -9.05   50.13
  -1   9 -20  749.34  106.35
  -1   9 -20  744.56   93.23
  -1  -9 -20  415.40   77.52
   1   9  20  515.94   90.82
   1  -9  20  792.44   97.09
   1   9  20  599.32   81.03
  -1   9 -20  796.28   97.03
  -1  -9 -20  439.39   57.14
  -1   9 -21  112.80   68.39
  -1   9 -21  147.90   55.71
   1   9  21   86.44   52.51
   1  -9  21  121.96   49.96
   1   9  21  140.55   58.85
  -1   9 -21  189.89   51.39
  -1  -9 -21   75.13   51.25
  -1   9 -22    1.37   68.71
  -1  -9 -22   48.30   62.82
  -1   9 -22    9.44   48.06
   1   9  22    7.38   49.63
   1  -9  22  -26.71   44.76
   1   9  22    5.57   43.94
  -1   9 -22  -32.77   55.60
  -1  -9 -22   -3.65   50.86
  -1   9 -23  196.00   64.99
  -1  -9 -23  143.93   63.47
  -1   9 -23  216.83   55.03
   1  -9  23  260.33   49.21
   1   9  23  170.08   55.46
  -1   9 -23  223.04   48.19
  -1  -9 -23  150.51   51.11
  -1   9 -24  315.07   77.10
  -1  -9 -24  245.13   81.97
  -1   9 -24  313.66   63.83
   1  -9  24  324.47   58.71
   1   9  24  252.81   54.54
  -1   9 -24  226.38   52.20
  -1  -9 -24  175.28   57.08
  -1   9 -25  -29.63   68.92
  -1  -9 -25   12.15   76.38
  -1   9 -25    3.16   57.94
   1  -9  25   50.74   48.76
   1   9  25  -30.59   59.35
  -1   9 -25   26.84   44.52
  -1  -9 -25   -7.44   66.82
  -1  -9 -26   67.21   95.80
  -1   9 -26   -5.47   61.68
   1  -9  26   15.44   53.57
   1   9  26    1.68   61.44
  -1   9 -26   56.59   48.96
  -1  -9 -26   60.38   54.66
  -1  -9 -27  -35.14   84.43
  -1   9 -27   56.32   37.66
   1  -9  27    8.16   58.81
   1   9  27    8.59   55.33
  -1   9 -27  140.42   59.67
  -1  -9 -27  -28.16   54.70
  -1  -9 -28  314.59   92.22
  -1   9 -28  179.24   43.44
   1  -9  28  368.44   81.44
   1   9  28  150.21   68.01
  -1   9 -28  313.49   67.23
  -1  -9 -28  177.04   68.55
   1 -10 -28   95.27  102.37
   1  10 -28   38.59   77.77
  -1 -10  28    8.53   64.52
  -1  10  28   56.47   55.82
   1  10 -28   -9.30   58.97
   1 -10 -28  -12.22   68.75
   1 -10 -27   86.40   92.14
   1  10 -27  126.01   68.48
  -1 -10  27  144.01   60.57
  -1  10  27   69.41   63.73
   1  10 -27  172.60   58.31
   1 -10 -27   75.77   66.61
   1 -10 -26  217.65   89.82
   1  10 -26  313.06   67.00
  -1 -10  26  436.08   73.82
  -1  10  26  273.51   64.20
   1  10 -26  408.79   73.55
   1 -10 -26  213.91   72.49
   1 -10 -25   28.71   81.94
   1  10 -25  -12.38   62.85
  -1 -10  25   -5.46   62.51
  -1  10  25  -10.29   41.86
   1  10 -25   26.51   62.81
   1 -10 -25  -10.24   53.90
   1 -10 -24   -8.82   66.06
   1  10 -24   90.54   63.44
  -1 -10  24   59.15   52.69
  -1  10  24    3.45   53.14
   1  10 -24  168.57   49.55
   1 -10 -24   99.06   56.97
   1 -10 -23   78.60   83.38
   1  10 -23  136.92   58.72
   1 -10 -23   80.30   57.97
  -1 -10  23  114.26   75.25
  -1  10  23  113.89   51.54
   1  10 -23   34.88   43.60
   1 -10 -23   48.69   61.41
   1 -10 -22 1931.10  284.11
   1  10 -22 2520.78   89.98
   1 -10 -22 1464.13  216.01
  -1 -10  22 2578.30   88.04
  -1  10  22 1823.94  262.57
   1 -10 -22 1662.14  240.54
   1 -10 -21  -19.17   62.19
   1  10 -21   12.57   73.10
   1 -10 -21    3.69   55.65
  -1  10  21   -3.80   46.29
   1 -10 -21   -2.30   54.42
   1  10 -20  184.71   68.29
   1 -10 -20  237.03   80.20
   1  10 -20  342.08   59.55
  -1 -10  20  271.90   48.25
  -1  10  20   93.19   41.32
   1 -10 -20  118.37   44.75
   1  10 -19  282.48   67.08
   1 -10 -19  240.37   72.23
   1 -10 -19  135.98   52.14
   1  10 -19  319.66   58.23
  -1 -10  19  217.31   47.87
  -1  10  19  222.95   53.23
   1 -10 -19  178.41   50.37
   1  10 -18  784.69   97.63
   1 -10 -18  446.22   67.59
   1  10 -18 1007.32  121.23
  -1  10  18  375.02   78.20
  -1 -10  18  825.28   79.95
  -1  10  18  595.02   75.60
   1 -10 -18  717.74   98.13
   1  10 -17  -27.90   58.43
   1 -10 -17   -5.52   56.97
   1  10 -17  -14.23   50.27
  -1  10  17   11.73   44.36
   1 -10 -17    0.66   43.61
   1  10 -16  690.17   90.68
  -1 -10  16  693.12   88.50
   1 -10 -16  373.45   59.12
   1  10 -16  738.17   87.99
  -1  10  16  482.37   77.47
  -1 -10  16  522.96   58.23
  -1  10  16  502.14   71.07
   1  10 -15  590.65   93.33
  -1 -10  15  698.15   95.72
   1 -10 -15  317.30   56.35
   1  10 -15  595.44   80.27
   1 -10 -15  400.59   54.84
  -1  10  15  398.90   58.03
  -1 -10  15  627.73   74.29
   1  10 -15  523.11   82.40
   1  10 -14  981.35  124.46
   1 -10 -14  479.45   80.17
   1 -10 -14  601.39   80.50
   1  10 -14 1061.84  147.12
   1 -10 -14  851.55   77.65
  -1  10  14  780.64   98.82
  -1 -10  14 1109.72  129.67
   1  10 -14 1078.59  128.79
   1  10 -13   13.23   45.66
   1 -10 -13   59.31   53.62
   1 -10 -13   -5.90   45.30
   1 -10 -13   38.96   48.50
  -1  10  13   -7.26   46.63
  -1 -10  13   -4.60   34.57
   1  10 -13  -23.99   52.82
   1 -10 -12   26.62   40.12
   1 -10 -12  -14.61   36.95
   1 -10 -12   25.09   48.35
   1 -10 -12   29.88   36.62
  -1  10  12   -5.08   34.57
  -1 -10  12   36.27   46.32
   1  10 -12   54.53   43.17
   1  10 -12   -1.27   32.19
   1 -10 -11  366.71   81.64
  -1  10  11  424.86   87.81
  -1 -10  11  496.28   60.57
   1 -10 -11  302.23   56.47
   1 -10 -11  377.04   63.89
   1 -10 -11  429.43   57.28
  -1  10  11  376.37   51.47
  -1 -10  11  443.57   53.91
   1  10 -11  531.56   66.83
  -1 -10  11  468.62   56.17
   1 -10 -10 1300.93  179.51
  -1  10  10 1125.92  149.65
  -1 -10  10 1489.16  160.46
   1 -10 -10  906.90  117.80
  -1 -10  10 1504.50  157.51
   1 -10 -10 1205.86  117.84
   1 -10 -10 1272.39  150.91
  -1  10  10 1165.05  115.81
  -1 -10  10 1495.97  156.26
   1  10 -10 1659.90  172.22
  -1 -10  10 1476.59  153.23
   1 -10  -9  344.66   76.88
  -1  10   9  346.37   65.14
  -1 -10   9  392.54   55.61
   1 -10  -9  307.35   50.56
   1  10  -9  418.01   53.81
  -1 -10   9  424.23   57.68
   1 -10  -9  238.45   39.12
   1 -10  -9  330.18   46.15
  -1  10   9  369.42   53.13
  -1 -10   9  376.39   43.26
   1  10  -9  423.37   56.43
  -1 -10   9  396.48   51.96
   1 -10  -8  -30.77   55.18
  -1  10   8   -6.55   45.85
  -1 -10   8   -6.69   45.97
   1 -10  -8   -9.02   45.28
   1  10  -8  -19.26   35.62
  -1 -10   8    3.71   46.54
   1 -10  -8   -8.90   42.87
   1 -10  -8  -11.40   30.88
  -1  10   8    1.65   43.58
  -1 -10   8  -18.22   38.79
   1  10  -8  -21.86   38.69
  -1 -10   8  -36.35   36.85
   1 -10  -8  -42.41   28.92
   1 -10  -7  193.66   58.69
  -1 -10   7  206.26   49.28
  -1  10   7  151.55   50.64
  -1  10   7  248.27   49.83
   1 -10  -7  161.25   38.09
   1  10  -7  267.59   50.53
  -1 -10   7  190.69   51.63
   1 -10  -7  124.22   38.45
   1 -10  -7  241.01   40.76
  -1  10   7  173.27   40.47
  -1 -10   7  195.00   34.30
   1  10  -7  261.48   47.68
  -1 -10   7  237.01   47.04
   1 -10  -7  156.22   37.06
   1 -10  -6  869.79  112.41
  -1 -10   6  807.78  102.32
  -1  10   6  637.60   77.04
  -1  10   6  892.58   84.17
   1 -10  -6  681.05   83.09
   1  10  -6  958.17   85.73
  -1 -10   6 1043.83   99.05
   1 -10  -6  803.92   86.69
   1 -10  -6  859.42   86.02
  -1  10   6  738.33   63.70
  -1 -10   6  911.64   83.99
   1  10  -6 1016.57   95.98
  -1 -10   6  903.76   82.46
   1 -10  -6  845.63   89.90
   1 -10  -5 1718.88  186.38
  -1 -10   5 1923.45  224.00
  -1  10   5 1534.39  155.32
  -1  10   5 1791.12  140.20
   1 -10  -5 1176.57  106.93
   1  10  -5 1929.53  187.75
  -1 -10   5 1918.51  190.36
  -1  10   5 1658.52  154.78
   1 -10  -5 1570.25  133.00
   1 -10  -5 1645.73  153.64
  -1  10   5 1657.22  139.61
  -1 -10   5 1757.39  138.37
   1  10  -5 2017.16  196.22
  -1 -10   5 1983.31  194.47
   1 -10  -5 1740.19  140.93
  -1 -10   4   79.29   52.09
   1 -10  -4  108.10   52.11
  -1  10   4   30.64   47.95
  -1  10   4   83.25   39.40
   1 -10  -4  107.94   48.86
   1  10  -4   67.91   30.22
  -1 -10   4   62.97   47.90
  -1  10   4   85.17   35.41
   1 -10  -4   48.02   43.05
   1 -10  -4   66.86   38.27
  -1 -10   4   48.16   33.40
  -1  10   4   41.83   35.75
   1  10  -4   64.70   38.61
  -1 -10   4   70.71   42.79
  -1 -10   3  851.81  119.46
   1 -10  -3  918.90  136.39
  -1  10   3  956.65  112.38
   1  10  -3  959.03   91.50
  -1  10   3  913.26   84.90
   1 -10  -3  930.88   90.61
   1  10  -3 1025.48   98.93
  -1 -10   3  981.06   96.76
  -1  10   3  908.90  114.94
   1 -10  -3  877.28   85.08
   1  10  -3 1067.12   93.69
   1 -10  -3  695.83   48.50
  -1 -10   3  963.67   84.92
  -1  10   3  714.83   50.68
   1  10  -3  748.99   70.39
  -1 -10   3  788.61   72.68
  -1 -10   2 2433.94  289.27
   1 -10  -2 2056.95  245.05
  -1  10   2 2502.00  256.24
   1  10  -2 2357.20  225.28
  -1  10   2 2733.07  259.32
   1 -10  -2 2253.82  219.56
   1  10  -2 2363.27  237.47
  -1 -10   2 2141.18  210.60
  -1  10   2 2595.25  260.47
   1 -10  -2 2200.38  214.66
   1  10  -2 2739.97  260.48
   1 -10  -2 2030.16  196.04
  -1 -10   2 2227.21  213.85
  -1  10   2 2321.15  231.90
  -1 -10   1  476.40   78.64
   1 -10  -1  502.27   95.45
   1  10  -1  509.17   58.42
  -1  10   1  453.35   52.75
  -1  10   1  515.54   49.17
   1 -10  -1  433.43   45.78
   1  10  -1  328.42   39.36
  -1 -10   1  483.07   62.90
  -1  10   1  544.58   65.92
   1  10  -1  504.23   52.61
   1 -10  -1  470.30   50.72
   1 -10  -1  545.29   47.87
  -1  10   1  385.97   44.89
  -1 -10   0 1329.21  172.15
   1 -10   0 1120.55  132.72
   1  10   0 1281.42  120.36
  -1  10   0 1470.94  129.03
  -1  10   0 1287.42  106.38
   1  10   0 1146.90  123.96
   1 -10   0 1409.06  121.29
  -1 -10   0 1339.67  134.11
  -1  10   0 1138.35  103.13
   1  10   0 1475.06  126.91
   1 -10   0 1500.62  137.76
   1 -10   0 1477.13  119.54
  -1  10   0 1283.51  108.56
  -1 -10  -1  377.71   69.33
   1  10   1  339.35   61.03
   1 -10   1  377.31   62.81
  -1  10  -1  444.11   57.87
  -1  10  -1  293.70   36.11
   1  10   1  398.81   70.89
   1 -10   1  454.66   64.20
  -1 -10  -1  328.68   53.85
  -1  10  -1  389.40   48.31
   1  10   1  454.63   52.31
   1 -10   1  442.18   50.74
  -1  10  -1  374.99   46.14
  -1 -10  -2 3446.53  354.67
   1  10   2 4550.71  452.53
   1 -10   2 3974.05  414.97
  -1  10  -2 3634.50  335.09
  -1  10  -2 4011.08  368.85
   1  10   2 3531.06  360.77
   1 -10   2 3907.47  359.13
  -1 -10  -2 3649.99  372.51
  -1  10  -2 3906.73  359.62
   1  10   2 4327.01  408.08
  -1 -10  -2 3823.85  366.17
   1  10   2 3681.18  339.99
   1 -10   2 4313.46  399.42
  -1  10  -2 5031.27  467.69
  -1 -10  -2 3932.29  369.08
   1 -10   3  338.10   61.18
  -1 -10  -3  329.13   64.99
   1  10   3  311.64   69.10
   1 -10   3  284.78   65.08
   1  10   3  220.75   36.07
  -1  10  -3  386.58   46.36
   1 -10   3  390.19   56.04
  -1 -10  -3  280.39   50.76
   1  10   3  348.52   46.63
  -1  10  -3  360.74   47.96
  -1 -10  -3  389.14   52.31
   1  10   3  314.04   43.34
   1 -10   3  348.41   42.44
  -1  10  -3  301.67   52.50
  -1 -10  -3  358.44   44.91
   1 -10   4 1727.33  136.81
  -1 -10  -4 1337.02  151.46
   1  10   4 2352.39  255.34
   1 -10   4 2130.18  214.97
   1  10   4 1890.27  232.33
  -1  10  -4 2359.15  227.08
  -1 -10  -4 1729.43  183.71
   1 -10   4 2638.38  253.45
   1  10   4 1950.25  210.71
  -1  10  -4 2792.96  266.68
  -1 -10  -4 1777.22  151.20
  -1 -10  -4 1866.93  191.19
   1  10   4 2069.07  202.16
   1 -10   4 2486.21  240.68
  -1  10  -4 2389.10  230.29
  -1 -10  -4 2084.39  223.79
   1 -10   5   50.77   57.87
  -1 -10  -5  -13.57   54.31
   1  10   5   -7.25   45.21
   1 -10   5   45.66   42.62
   1  10   5  -18.43   34.72
  -1 -10  -5  -15.32   36.82
   1 -10   5   37.26   39.21
   1  10   5   50.60   37.89
  -1 -10  -5    6.15   45.59
  -1  10  -5   34.18   44.87
  -1 -10  -5   61.23   36.98
   1  10   5   45.82   43.39
   1 -10   5   15.04   38.09
  -1  10  -5   18.10   42.05
  -1 -10  -5   25.78   43.96
   1 -10   6 4090.16  368.46
  -1 -10  -6 3546.07  369.40
   1  10   6 3442.65  345.67
   1 -10   6 3619.08  346.95
   1  10   6 3155.03  285.69
   1  10   6 3566.68  337.68
  -1 -10  -6 2803.60  265.30
  -1  10  -6 3458.83  313.71
  -1 -10  -6 3376.04  327.28
   1  10   6 3414.97  307.81
  -1  10  -6 4248.41  377.63
  -1 -10  -6 3220.73  304.52
   1 -10   7    0.03   49.20
  -1 -10  -7    5.18   54.58
   1  10   7   20.83   49.19
   1 -10   7   -0.17   37.75
   1  10   7   -1.88   30.01
  -1 -10  -7   22.68   37.99
   1  10   7   -6.65   35.93
  -1 -10  -7  -25.04   43.66
  -1 -10  -7    0.52   42.53
   1  10   7  -24.00   31.24
  -1  10  -7  -22.82   44.95
  -1 -10  -7   27.92   43.10
   1 -10   8  124.55   51.54
  -1 -10  -8   97.31   51.72
   1  10   8   63.54   62.41
   1 -10   8  101.75   45.71
   1  10   8   86.80   41.92
  -1 -10  -8   78.55   40.66
   1  10   8   72.79   32.18
  -1 -10  -8   43.05   44.74
  -1 -10  -8   80.63   42.52
   1  10   8   90.75   42.43
  -1  10  -8   83.16   33.16
  -1 -10  -8   96.42   35.16
   1 -10   9  309.83   50.58
  -1 -10  -9  229.88   81.22
   1  10   9  206.96   67.01
   1 -10   9  248.29   43.72
  -1 -10  -9  208.15   67.10
  -1  10  -9  320.62   51.75
   1  10   9  213.18   47.56
  -1 -10  -9  249.11   48.91
  -1 -10  -9  241.99   46.22
   1  10   9  243.72   45.92
  -1  10 -10 6547.93  635.61
   1 -10  10 6577.54  631.06
  -1 -10 -10 4571.79  473.08
   1  10  10 5313.22  546.32
  -1  10 -10 6475.55  618.93
   1  10  10 5008.05  492.05
  -1 -10 -10 5444.28  543.23
  -1 -10 -10 5429.86  539.50
   1  10  10 5514.91  541.98
   1 -10  10 6021.00  578.41
   1  10  10 6287.13  610.82
  -1  10 -11  111.44   45.68
   1 -10  11  185.28   53.98
  -1 -10 -11   56.80   51.04
   1  10  11  139.48   59.13
  -1 -10 -11   39.79   34.10
  -1  10 -11  225.02   50.45
   1 -10  11  150.24   47.68
   1  10  11  117.17   45.29
  -1 -10 -11  100.05   37.38
  -1 -10 -11  108.88   39.16
   1  10  11   75.47   45.43
   1 -10  11  151.24   46.54
   1  10  11  103.22   43.02
  -1  10 -12  454.69   67.84
   1 -10  12  472.29   59.45
  -1 -10 -12  317.89   76.82
   1  10  12  279.29   64.32
  -1 -10 -12  163.17   44.31
  -1  10 -12  407.40   48.63
  -1 -10 -12  322.05   60.90
   1  10  12  317.14   57.51
   1 -10  12  392.18   46.53
   1  10  12  306.97   43.96
  -1  10 -13  170.11   57.19
   1 -10  13  203.61   55.14
  -1 -10 -13  172.88   58.04
  -1 -10 -13   97.94   41.53
  -1 -10 -13  182.44   49.09
   1 -10  13  158.02   50.12
  -1  10 -14 4447.73  476.35
   1 -10  14 4845.12  515.44
  -1 -10 -14 2894.60  362.77
  -1 -10 -14 2223.96  291.44
  -1  10 -14 4678.51  495.45
  -1 -10 -14 3159.45  360.53
   1 -10  14 4358.00  465.38
  -1  10 -15  260.99   60.82
   1 -10  15  357.63   66.48
  -1 -10 -15  250.44   71.90
  -1 -10 -15  105.23   47.73
  -1  10 -15  218.02   43.29
  -1 -10 -15  235.68   57.57
   1 -10  15  292.71   84.14
  -1 -10 -15  195.93   56.17
  -1  10 -16  499.96   77.35
   1 -10  16  725.83   98.91
  -1 -10 -16  464.91   93.59
  -1 -10 -16  274.82   68.74
  -1  10 -16  481.04   59.53
   1 -10  16  562.19   70.94
   1  10  16  533.30   74.92
  -1 -10 -16  447.19   57.68
  -1  10 -17  317.20   64.15
   1 -10  17  348.28   70.95
  -1 -10 -17  143.41   75.51
  -1  10 -17  166.25   46.01
  -1 -10 -17  204.52   54.56
   1  10  17  217.13   53.18
  -1 -10 -17  155.45   49.24
  -1  10 -18 1662.06  184.34
   1 -10  18 1890.14  196.10
  -1 -10 -18 1097.41  159.12
  -1  10 -18 1124.96  115.50
  -1 -10 -18  770.52  109.15
   1 -10  18 1886.45  194.85
   1  10  18 1298.99  149.75
  -1  10 -18 1567.37  163.26
  -1 -10 -18 1010.37  123.80
  -1  10 -19   12.20   60.91
  -1  10 -19   35.58   29.11
  -1 -10 -19  -22.21   51.90
   1 -10  19    6.21   82.17
   1  10  19   47.15   50.20
  -1  10 -19   -1.73   50.63
  -1 -10 -19    0.12   45.20
  -1  10 -20  334.59   89.41
  -1  10 -20   97.06   32.64
   1 -10  20  276.27   55.44
   1  10  20  114.61   44.19
  -1  10 -20  238.16   44.75
  -1 -10 -20  164.89   54.23
  -1  10 -21  139.74   68.87
  -1  10 -21  109.27   34.44
   1  10  21   98.23   61.08
   1 -10  21  148.56   51.93
   1  10  21  119.43   57.22
  -1  10 -21  102.90   49.19
  -1 -10 -21  115.18   52.07
  -1  10 -22  399.83   61.56
  -1  10 -22  293.69   37.36
   1 -10  22  511.32   65.26
   1  10  22  360.84   69.31
  -1  10 -22  487.69   60.68
  -1 -10 -22  349.09   67.24
  -1  10 -23   64.76   66.80
  -1  10 -23   28.19   36.37
   1 -10  23   71.62   58.97
   1  10  23  102.09   56.46
  -1  10 -23  113.40   49.75
  -1 -10 -23   56.12   56.42
  -1 -10 -24    5.94   63.58
  -1  10 -24   24.20   35.83
   1 -10  24   51.18   57.25
   1  10  24   48.69   51.63
  -1  10 -24   58.99   46.53
  -1 -10 -24   45.20   55.59
  -1 -10 -25  133.78   76.51
  -1  10 -25  226.44   43.90
   1 -10  25  216.05   58.76
   1  10  25  183.36   64.11
  -1  10 -25  228.16   56.59
  -1 -10 -25  122.66   70.39
  -1 -10 -26   97.79   86.02
  -1  10 -26   83.64   50.92
   1 -10  26  121.27   70.21
   1  10  26   76.67   66.40
  -1  10 -26   84.25   49.83
  -1 -10 -26   74.57   58.32
  -1 -10 -27  -51.46   81.39
  -1  10 -27   41.43   44.14
   1 -10  27  109.46   64.97
   1  10  27   78.67   58.04
  -1  10 -27  178.21   55.23
  -1 -10 -27   81.94   58.72
  -1 -10 -28  102.22   88.25
  -1  10 -28   89.76   66.05
   1 -10  28  120.54   69.05
   1  10  28  222.74   69.80
  -1  10 -28   46.48   63.84
  -1 -10 -28   46.54   55.92
   1 -11 -27  111.85   81.82
   1  11 -27   53.08   53.34
  -1 -11  27   50.07   82.15
  -1  11  27  -12.84   62.76
   1  11 -27   43.23   66.96
   1 -11 -27   65.00   60.34
   1 -11 -26   12.03   82.51
   1  11 -26    3.77   50.66
  -1 -11  26    0.43   58.51
  -1  11  26   62.11   44.59
   1  11 -26   16.90   55.48
   1 -11 -26   17.40   62.00
   1 -11 -25  394.92   93.86
   1  11 -25  862.15   75.54
  -1 -11  25  747.57  103.88
  -1  11  25  427.16   83.03
   1  11 -25  663.30   89.29
   1 -11 -25  363.87   74.51
   1 -11 -24  273.07   89.44
   1  11 -24  412.65   64.56
  -1 -11  24  389.52   65.99
  -1  11  24  243.14   60.05
   1 -11 -24  135.80   57.86
   1 -11 -23  344.62   78.39
   1  11 -23  568.70  100.86
  -1 -11  23  605.45  113.24
  -1  11  23  375.57   64.35
   1 -11 -23  324.94   65.49
   1 -11 -22   69.24   75.45
   1  11 -22   48.42   55.69
   1 -11 -22   41.35   58.24
  -1 -11  22   30.07   41.96
  -1  11  22   58.88   61.19
   1 -11 -22   21.29   62.89
   1 -11 -21  953.43  159.83
   1  11 -21 1260.33  173.33
   1 -11 -21  541.21   92.30
  -1 -11  21  871.53  120.47
  -1  11  21  719.04   98.68
   1 -11 -21  637.18   88.09
   1  11 -20  132.63   56.74
  -1  11  20   44.28   44.13
   1 -11 -20   32.23   44.60
   1  11 -19  199.96   46.70
  -1 -11  19   72.84   55.62
  -1  11  19   60.95   42.22
   1 -11 -19   80.64   45.86
   1  11 -18   15.78   58.61
   1 -11 -18   20.43   45.40
   1  11 -18   27.80   46.59
  -1 -11  18   34.07   47.70
  -1  11  18   -3.28   40.64
   1 -11 -18  -17.09   49.89
   1  11 -17  211.97   55.72
   1 -11 -17  166.35   63.03
   1  11 -17  192.32   43.21
  -1 -11  17  183.10   46.25
  -1  11  17  172.02   52.84
   1 -11 -17  116.52   38.81
   1  11 -16  423.10   69.58
   1 -11 -16  287.10   58.70
   1  11 -16  470.28   64.19
  -1 -11  16  463.93   63.76
   1  11 -16  377.54   55.06
   1  11 -15   36.69   60.73
   1 -11 -15   84.83   63.10
   1 -11 -15   22.01   45.73
   1  11 -15   84.29   41.35
   1 -11 -15  -27.16   38.25
  -1 -11  15   54.33   46.42
   1  11 -15   66.65   42.39
   1 -11 -14  716.23  117.55
  -1 -11  14  892.95  103.41
   1 -11 -14  411.00   65.66
   1 -11 -14  608.85   94.20
  -1  11  14  509.13   73.88
  -1 -11  14  919.27  102.65
   1 -11 -13  503.65   84.09
  -1 -11  13  789.71  103.96
   1 -11 -13  465.78   83.19
   1 -11 -13  674.94   88.45
  -1  11  13  558.39   77.61
  -1 -11  13  729.18   83.62
   1 -11 -12  912.50  127.49
  -1 -11  12 1120.08  142.84
   1 -11 -12  804.64  108.05
   1 -11 -12  923.52  118.36
  -1  11  12  753.95   92.19
  -1 -11  12 1003.00  104.58
   1 -11 -11  198.40   68.64
  -1 -11  11  292.48   46.08
   1 -11 -11  182.59   44.44
   1 -11 -11  232.29   53.31
   1 -11 -11  276.07   49.13
  -1  11  11  241.06   42.92
  -1 -11  11  318.30   51.98
   1  11 -11  362.81   56.57
   1 -11 -10   44.38   54.28
  -1  11  10   27.02   50.04
  -1 -11  10   39.24   43.25
   1 -11 -10   22.90   39.69
   1  11 -10   50.96   45.79
  -1 -11  10  114.55   47.69
   1 -11 -10   76.95   42.51
   1 -11 -10   70.48   45.01
  -1  11  10   27.90   45.01
  -1 -11  10  114.39   38.62
   1  11 -10   22.15   33.66
  -1 -11  10   97.58   47.77
   1 -11  -9  705.95  109.18
  -1  11   9  555.34   87.30
  -1 -11   9  711.47   89.21
   1 -11  -9  511.38   81.07
   1  11  -9  897.24   85.48
  -1 -11   9  693.76   65.35
   1 -11  -9  585.06   73.51
   1 -11  -9  649.99   71.09
  -1  11   9  455.45   54.01
  -1 -11   9  771.50   71.25
   1  11  -9  794.54   83.26
  -1 -11   9  809.62   73.09
   1 -11  -9  641.37   70.49
   1 -11  -8   63.72   52.02
  -1 -11   8   -0.29   52.08
  -1  11   8   30.84   48.45
   1 -11  -8   37.05   39.13
   1  11  -8  -12.12   35.96
  -1 -11   8    0.79   48.56
   1 -11  -8    8.95   48.24
   1 -11  -8  -21.38   43.43
  -1  11   8   29.55   40.01
  -1 -11   8   38.55   32.81
   1  11  -8  -10.48   44.90
  -1 -11   8  -10.81   37.51
   1 -11  -8  -13.96   43.67
   1 -11  -7  158.81   64.37
  -1 -11   7  166.53   57.16
  -1  11   7  110.82   56.96
  -1  11   7  137.05   47.48
   1 -11  -7  106.35   33.36
   1  11  -7  197.13   51.48
  -1 -11   7  202.44   57.59
   1 -11  -7  128.71   47.94
   1 -11  -7  135.13   43.96
  -1  11   7  133.89   39.44
  -1 -11   7  238.41   46.71
   1  11  -7  236.58   47.39
  -1 -11   7  243.92   46.44
   1 -11  -7  170.78   41.74
   1 -11  -6 1666.25  217.66
  -1 -11   6 1701.60  197.01
  -1  11   6 1739.31  187.42
  -1  11   6 1706.90  158.98
   1 -11  -6 1287.80  139.80
   1  11  -6 2178.69  207.57
  -1 -11   6 2165.83  205.58
   1 -11  -6 1344.18  131.06
   1 -11  -6 1840.08  188.64
  -1  11   6 1505.34  146.45
  -1 -11   6 1928.79  177.41
   1  11  -6 2096.44  194.14
  -1 -11   6 2125.42  197.59
   1 -11  -6 1980.03  190.39
   1 -11  -5  904.04  130.06
  -1 -11   5  778.92  116.41
  -1  11   5  959.10  115.46
  -1  11   5  996.69  101.61
   1 -11  -5  936.31  111.91
   1  11  -5  890.17   89.08
  -1 -11   5 1030.19  105.69
  -1  11   5  789.61   92.60
   1 -11  -5  938.00   99.51
   1 -11  -5  909.00  101.91
  -1 -11   5  646.78   65.05
  -1  11   5  588.47   65.44
   1  11  -5 1136.86  114.03
  -1 -11   5  748.94   76.26
   1 -11  -5  947.42  112.62
  -1 -11   4  186.07   50.87
   1 -11  -4  160.31   47.90
  -1  11   4  207.20   49.42
  -1  11   4  202.31   38.66
   1 -11  -4  272.08   52.03
   1  11  -4  261.46   45.85
  -1 -11   4  295.09   56.41
  -1  11   4  295.21   50.32
   1 -11  -4  282.79   54.84
   1  11  -4  245.88   38.87
   1 -11  -4  221.95   47.50
  -1 -11   4  204.04   37.00
  -1  11   4  225.50   40.83
   1  11  -4  263.59   46.38
  -1 -11   4  245.19   48.17
  -1 -11   3   47.80   49.22
   1 -11  -3   30.73   44.91
  -1  11   3   52.79   52.86
   1  11  -3   64.15   42.45
  -1  11   3   78.39   38.44
   1 -11  -3   43.11   36.47
   1  11  -3   46.35   31.26
  -1 -11   3    8.70   40.78
  -1  11   3   57.31   35.96
   1 -11  -3   13.38   37.65
   1  11  -3    3.03   31.08
   1 -11  -3   46.93   39.48
  -1 -11   3   57.19   31.26
  -1  11   3   28.03   38.62
  -1 -11   3   82.58   40.47
  -1 -11   2 1033.70  129.08
   1 -11  -2 1099.08  149.55
  -1  11   2 1110.95  121.73
   1  11  -2 1026.99   94.07
  -1  11   2 1065.67   96.72
   1 -11  -2  980.95   94.42
   1  11  -2  770.29   90.79
  -1 -11   2  891.65   88.87
  -1  11   2 1068.49  137.00
   1 -11  -2 1096.46  102.81
   1  11  -2 1036.54   90.44
   1 -11  -2 1077.20   94.77
  -1  11   2 1004.49   94.94
  -1 -11   1 1807.81  189.30
   1 -11  -1 1595.48  206.16
   1  11  -1 2099.72  208.40
  -1  11   1 1654.14  131.59
  -1  11   1 2033.23  197.96
   1  11  -1 1833.15  164.59
   1 -11  -1 1411.85  113.11
  -1 -11   1 1806.55  161.47
  -1  11   1 1867.92  197.53
   1  11  -1 2715.22  265.82
   1 -11  -1 1479.99  118.00
   1 -11  -1 2091.29  204.81
  -1  11   1 1753.75  139.21
  -1 -11   0   55.98   44.64
   1 -11   0  118.32   49.47
   1  11   0   74.87   50.41
  -1  11   0  125.26   44.85
  -1  11   0   66.43   36.83
   1  11   0   57.96   38.54
   1 -11   0   99.70   43.38
  -1 -11   0   81.82   40.07
  -1  11   0  128.67   39.41
   1  11   0  106.02   32.81
   1 -11   0   76.76   41.98
   1 -11   0   43.36   33.92
  -1  11   0   92.33   38.15
  -1 -11  -1 1853.17  230.81
   1 -11   1 1988.35  235.99
   1  11   1 2181.58  246.27
  -1  11  -1 2139.60  209.15
  -1  11  -1 2052.79  196.15
   1  11   1 1967.70  241.88
   1 -11   1 2095.13  212.88
  -1 -11  -1 1755.46  160.01
  -1  11  -1 2069.68  210.05
   1  11   1 2078.94  204.80
   1 -11   1 1926.50  185.16
  -1  11  -1 2391.85  230.55
  -1  11  -2  154.15    4.83
   1 -11   3 2288.99  218.61
  -1 -11  -3 2153.86  250.90
   1  11   3 2373.62  249.55
   1 -11   3 2091.04  243.56
   1  11   3 1783.49  209.11
  -1  11  -3 2202.15  200.71
   1 -11   3 2599.43  242.86
  -1 -11  -3 1849.50  219.69
   1  11   3 2437.60  233.01
  -1  11  -3 2666.91  258.27
  -1 -11  -3 2137.17  216.34
   1  11   3 2239.32  204.52
   1 -11   3 2469.77  223.29
  -1  11  -3 2448.11  222.09
  -1 -11  -3 2327.73  225.79
   1 -11   4   -0.06   47.59
  -1 -11  -4   -1.34   46.98
   1  11   4   25.33   48.37
   1 -11   4    8.24   45.13
   1  11   4   33.41   34.56
  -1  11  -4    4.72   38.31
  -1 -11  -4   13.85   39.67
   1 -11   4    5.62   43.08
   1  11   4    5.13   37.60
  -1  11  -4  -12.69   27.87
  -1 -11  -4   31.00   45.28
  -1 -11  -4   19.98   36.75
   1  11   4   26.24   39.93
   1 -11   4  -13.37   28.60
  -1  11  -4    4.59   37.99
  -1 -11  -4   15.34   32.23
   1 -11   5  408.58   58.63
  -1 -11  -5  364.25   74.24
   1  11   5  276.46   63.24
   1 -11   5  439.29   56.61
   1  11   5  330.22   72.56
  -1  11  -5  347.20   40.09
   1 -11   5  397.23   50.28
   1  11   5  388.75   63.64
  -1  11  -5  392.90   45.12
  -1 -11  -5  369.32   64.80
  -1 -11  -5  268.41   55.85
   1  11   5  467.54   49.92
   1 -11   5  430.53   50.85
  -1  11  -5  493.68   55.65
  -1 -11  -5  451.22   49.09
   1 -11   6   -0.99   54.86
  -1 -11  -6  -26.93   52.13
   1  11   6   10.82   53.29
   1 -11   6    4.48   34.81
   1  11   6    8.08   33.03
  -1 -11  -6    4.41   40.33
   1 -11   6  -28.84   42.02
   1  11   6   17.67   46.03
  -1 -11  -6  -21.44   42.60
  -1  11  -6  -14.06   23.73
  -1 -11  -6  -41.44   46.16
   1  11   6   -2.33   41.60
   1 -11   6   19.87   35.07
  -1  11  -6   12.75   38.37
  -1 -11  -6    9.21   33.54
   1 -11   7 1975.62  207.59
  -1 -11  -7 1431.40  193.15
   1  11   7 1580.83  203.70
   1 -11   7 1621.37  186.05
   1  11   7 1727.87  190.37
  -1 -11  -7  967.22  142.04
   1  11   7 1383.95  147.03
  -1 -11  -7 1471.30  175.65
  -1  11  -7 1512.56  157.49
  -1 -11  -7 1335.18  153.03
   1  11   7 1590.00  174.97
  -1  11  -7 1929.15  195.60
  -1 -11  -7 1761.29  206.40
   1 -11   8 2515.61  258.58
  -1 -11  -8 1842.35  242.93
   1  11   8 1684.84  205.12
   1 -11   8 2354.48  254.73
   1  11   8 2241.65  228.41
  -1 -11  -8 1181.07  157.85
   1  11   8 1615.06  174.03
  -1 -11  -8 1560.13  172.59
  -1 -11  -8 1933.48  209.48
   1  11   8 1880.44  197.47
  -1  11  -8 2293.63  232.62
  -1 -11  -8 1567.52  183.44
   1 -11   9 1959.17  215.87
  -1 -11  -9 1622.69  211.36
   1  11   9 1666.44  217.96
   1 -11   9 2019.38  225.17
  -1 -11  -9 1243.46  197.32
   1  11   9 2041.21  230.71
  -1 -11  -9 1912.12  228.88
[truncated: 1,727,502 more chars]
