# Supplementary material
Source: MDPI journal article supplement (https://www.mdpi.com/2304-6740/6/3/76)
Supplement: s1 [file s1 › inorganics-328290-supplementary.pdf]

# Synthesis and Characterizations of The Germathioacid chloride Coordinated by an *N*-Heterocyclic carbene ‡

Yasunobu Egawa<sup>1,†,\*</sup>, Chihiro Fukumoto<sup>1</sup>, Koichiro Mikami<sup>2</sup>, Nobuhiro Takeda<sup>1</sup> and Masafumi Unno<sup>1\*</sup>

<sup>1</sup> Department of Chemistry and Chemical Biology, Graduate School of Science and Technology, Gunma University, Kiryu, Gunma 376-8515, Japan; t161a085@gunma-u.ac.jp (C.F.); ntakeda@gunma-u.ac.jp (N.T.);

<sup>2</sup> Functional Polymer Group, Sagami Chemical Research Institute, 2743-1 Hayakawa, Ayase, Kanagawa 252-1193, Japan; koichiro.mikami@sagami.or.jp

† Present Address: Frontier Research Group, Research and Development (R&D) Center for Marine Bioscience, Japan Agency for Marine-Earth Science and Technology (JAMSTEC), 2-15 Natsushima-cho, Yokosuka, Kanagawa 237-0061, Japan

\* Correspondence: nobu\_egawa@jamstec.go.jp (Y.E.); unno@gunma-u.ac.jp (M.U.); Tel.: +81-46-863-9659 (Y.E.); +81-277-30-1230 (M.U.)

‡ Dedicated to Prof. Dr. Robert West in honors of his 90th birthday.

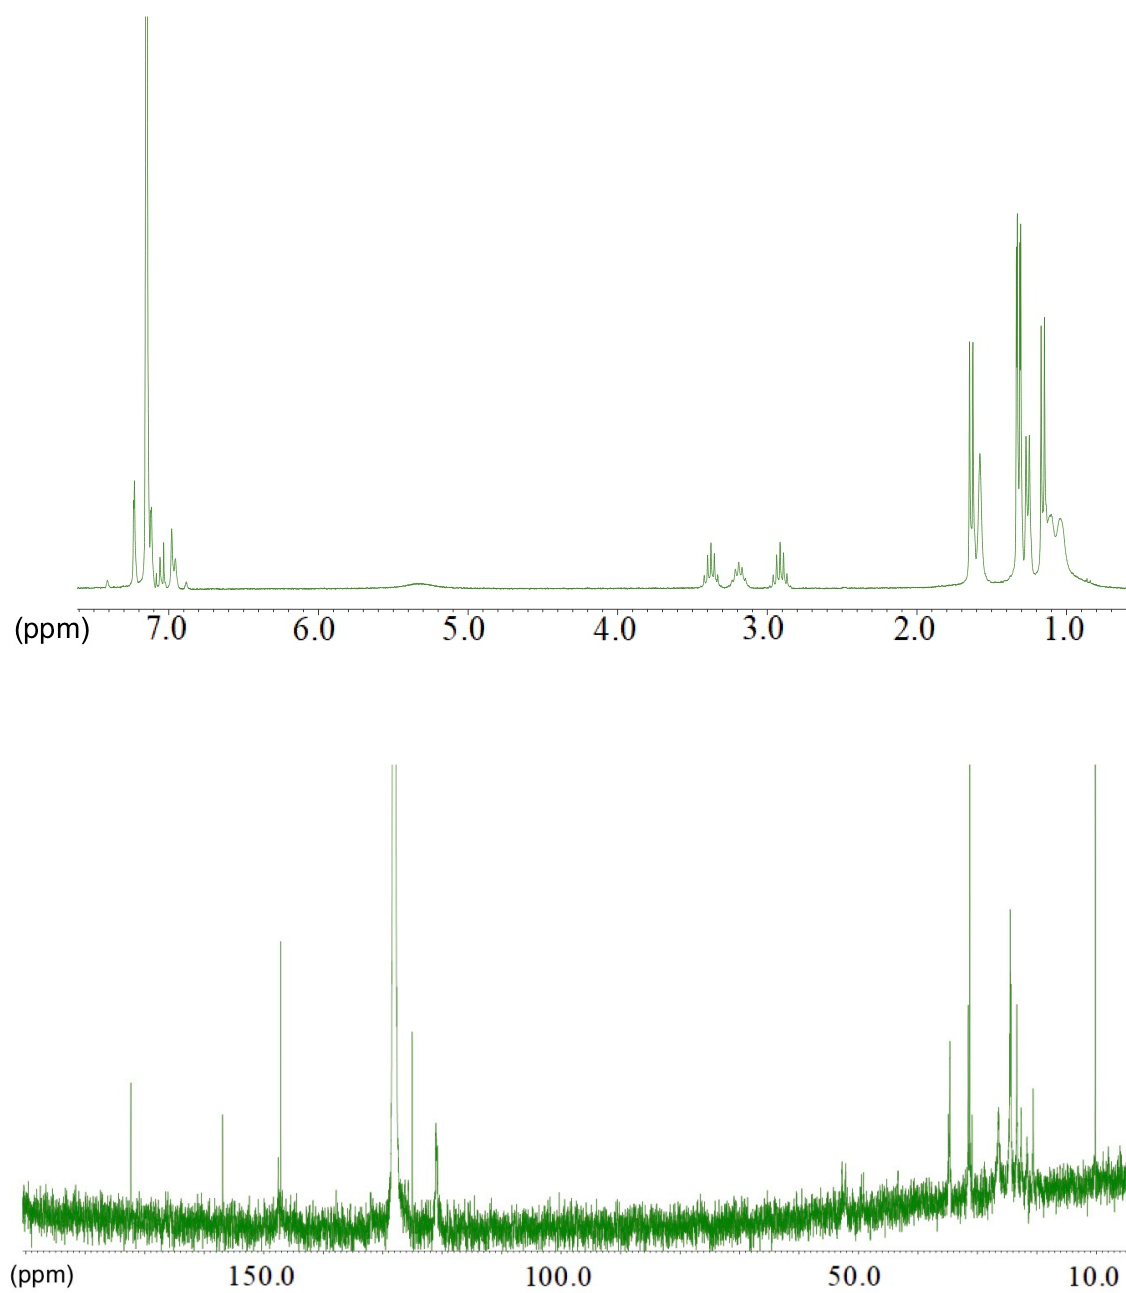

**Figure S1.**  $^1H$ -NMR (top) and  $^{13}C\{^1H\}$ -NMR (bottom) spectra of **2** in  $C_6D_6$

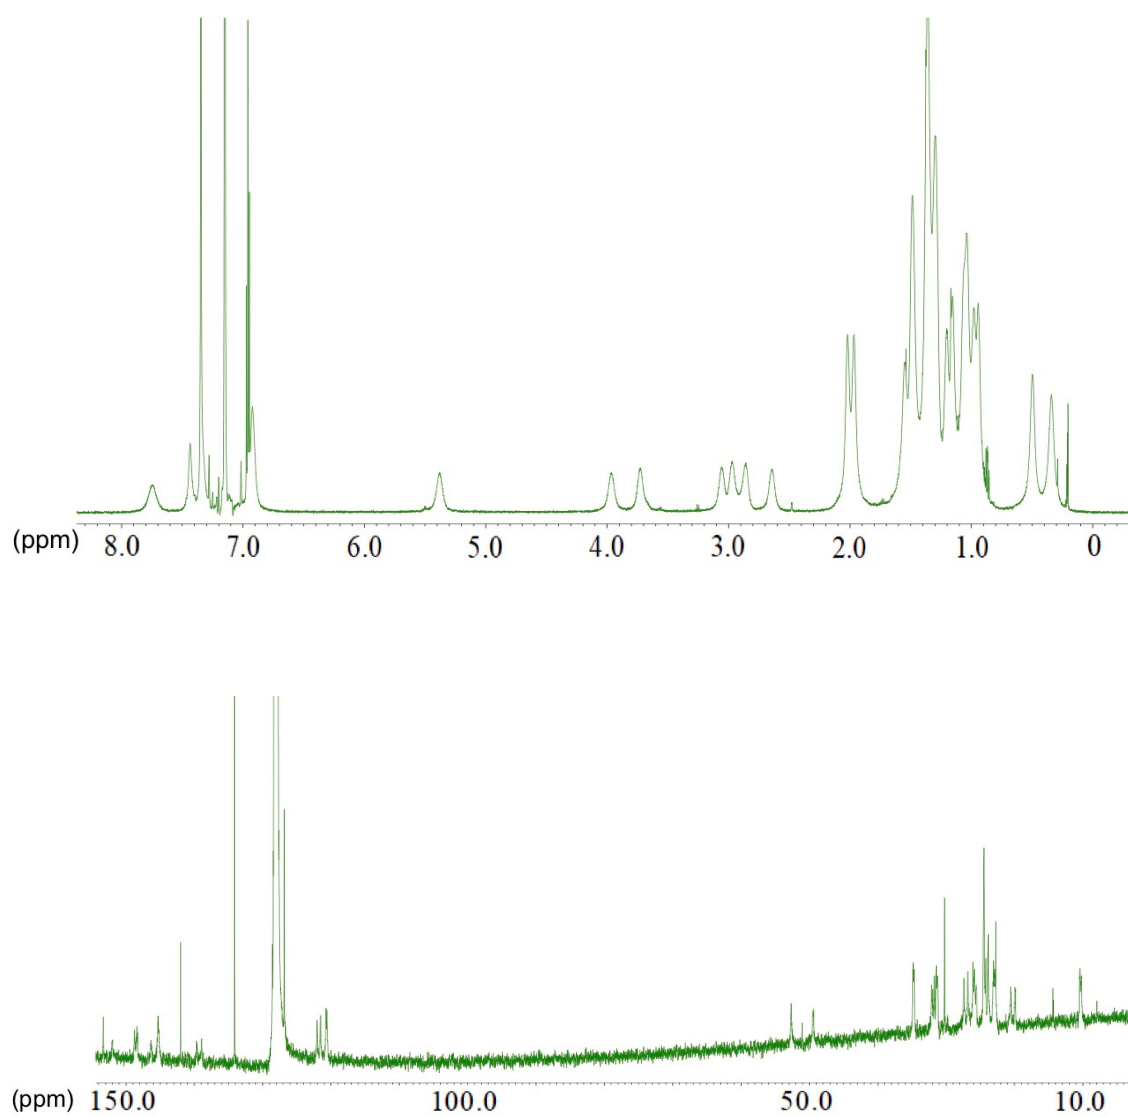

**Figure S2.**  $^1H$ -NMR (top) and  $^{13}C\{^1H\}$ -NMR (bottom) spectra of **3** in  $C_6D_6$

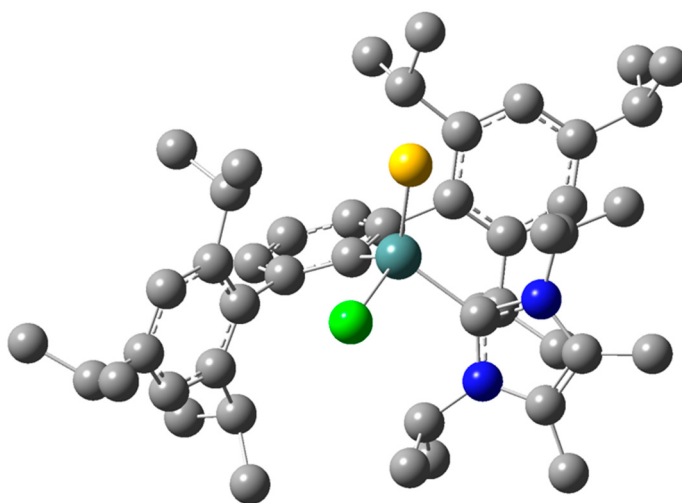

**Figure S3.** Optimized geometries of germathioacid chloride **3**. The geometries were given by ball and stick model (atom color: C: Silver, S: Dark yellow, N: Blue, Cl: Light green, Ge: Green). Hydrogen atoms were omitted for clarify. Selected bond lengths (Å), angles (deg), and Wiberg bond index (WBI): Ge–S = 2.107, Ge–Cl = 2.297, Ge–(NHC) = 2.078, Ge–C(Ar<sub>Tip</sub>) = 1.984, S–Ge–Cl = 105.6, S–Ge–C(NHC) = 116.4, S–Ge–C(Ar<sub>Tip</sub>) = 116.9, C(Ar<sub>Tip</sub>)–Ge–Cl = 113.1, C(Ar<sub>Tip</sub>)–Ge–C(NHC) = 110.8, C(NHC)–Ge–Cl = 90.9. WBI<sub>Ge–S</sub> = 1.367, WBI<sub>Ge–Cl</sub> = 0.664, WBI<sub>Ge–C(NHC)</sub> = 0.603, WBI<sub>Ge–C(Ar<sub>Tip</sub>)</sub> = 0.709. NPA charges of germathioacid chloride **3**: Ge = +1.240, S = –0.762, Cl = –0.456, C(NHC) = +0.114, C(Ar<sub>Tip</sub>) = –0.442.

## Cartesian Coordinates (in Å) and Energies

### Germathioacid chloride

Energy (RB3LYP) = -4875.7021922 A.U.

Free Energy = -4874.731276 A.U.

|    |             |             |             |
|----|-------------|-------------|-------------|
| Ge | -0.09577900 | 0.04161200  | -1.00136500 |
| S  | 0.52572100  | -1.22663400 | -2.56447000 |
| Cl | -1.91167900 | 1.18689500  | -1.81946100 |
| C  | -0.43805400 | -0.80653800 | 0.75949200  |
| C  | -1.73410700 | -1.12769900 | 1.25808900  |
| C  | -1.84087800 | -1.93139700 | 2.40633600  |
| H  | -2.83166800 | -2.21916700 | 2.73828200  |
| C  | -0.72747600 | -2.37837400 | 3.10166400  |
| H  | -0.84080000 | -2.98969600 | 3.99227900  |
| C  | 0.53387300  | -2.06209000 | 2.61797500  |
| H  | 1.41658300  | -2.43197800 | 3.12891900  |
| C  | 0.70522300  | -1.31354100 | 1.44194100  |
| C  | -3.07071800 | -0.75580600 | 0.65421000  |
| C  | -3.55143700 | -1.45009800 | -0.48536900 |
| C  | -4.84630500 | -1.19313500 | -0.94349300 |
| H  | -5.20069600 | -1.72879800 | -1.81828200 |
| C  | -5.69885900 | -0.28569400 | -0.31424200 |
| C  | -5.22471600 | 0.35459600  | 0.82834000  |
| H  | -5.88763400 | 1.04295500  | 1.34541900  |
| C  | -3.93956900 | 0.13258700  | 1.33896100  |
| C  | -2.74555300 | -2.54696900 | -1.18042600 |
| H  | -1.69514000 | -2.43616200 | -0.90379500 |
| C  | -2.79846500 | -2.46177400 | -2.71401800 |
| H  | -3.80367500 | -2.65037800 | -3.10736800 |
| H  | -2.12758400 | -3.20988800 | -3.14642000 |
| H  | -2.45615400 | -1.48232200 | -3.05157500 |
| C  | -3.20271100 | -3.93407600 | -0.68425800 |
| H  | -3.10172700 | -4.02610300 | 0.40216100  |
| H  | -2.60156300 | -4.72371400 | -1.14852600 |
| H  | -4.25316800 | -4.11615400 | -0.93871400 |
| C  | -7.10206100 | -0.01145600 | -0.83805800 |
| H  | -7.55946700 | 0.72331700  | -0.16160200 |
| C  | -7.07320700 | 0.61212100  | -2.24594100 |
| H  | -6.63731200 | -0.07825000 | -2.97581700 |
| H  | -6.47480000 | 1.52799700  | -2.26000400 |
| H  | -8.08674300 | 0.85809400  | -2.58232400 |
| C  | -7.98454400 | -1.27336000 | -0.81057900 |
| H  | -9.00455400 | -1.04044000 | -1.13609600 |
| H  | -8.03643000 | -1.69868000 | 0.19657900  |
| H  | -7.59191000 | -2.04726000 | -1.47886500 |
| C  | -3.56976900 | 0.83573600  | 2.65032000  |
| H  | -2.48171600 | 0.78789600  | 2.76779700  |
| C  | -3.98292000 | 2.32021600  | 2.67330000  |
| H  | -3.66057100 | 2.84706200  | 1.77316000  |
| H  | -3.55262000 | 2.82207700  | 3.54736500  |
| H  | -5.06875900 | 2.43692800  | 2.74650900  |
| C  | -4.20542000 | 0.14083700  | 3.87441400  |
| H  | -5.29744700 | 0.13937100  | 3.78860000  |

|   |             |             |             |
|---|-------------|-------------|-------------|
| H | -3.94169800 | 0.67086500  | 4.79705100  |
| H | -3.87926300 | -0.89516000 | 3.98074400  |
| C | 2.15474600  | -1.20143900 | 1.00568100  |
| C | 2.73704400  | -2.25622400 | 0.24906400  |
| C | 4.11966000  | -2.25528500 | 0.03865400  |
| H | 4.55432600  | -3.06904400 | -0.53186400 |
| C | 4.96052400  | -1.26836900 | 0.55800000  |
| C | 4.37252500  | -0.24875100 | 1.30580500  |
| H | 5.01590400  | 0.51321500  | 1.73660300  |
| C | 2.99333700  | -0.19927000 | 1.55184100  |
| C | 1.92036800  | -3.44769200 | -0.25526200 |
| H | 0.89831800  | -3.09063000 | -0.40017300 |
| C | 2.40227300  | -3.99401400 | -1.61047400 |
| H | 2.50836400  | -3.19351800 | -2.34381500 |
| H | 1.66733100  | -4.70707600 | -1.99731300 |
| H | 3.35444700  | -4.53054000 | -1.52167400 |
| C | 1.91535300  | -4.59878600 | 0.77357200  |
| H | 2.93454100  | -4.95892200 | 0.95652000  |
| H | 1.32764100  | -5.44072900 | 0.39116200  |
| H | 1.48582700  | -4.30141600 | 1.73203100  |
| C | 6.47437700  | -1.33570600 | 0.39376300  |
| H | 6.87870200  | -0.37803500 | 0.74913600  |
| C | 6.91991600  | -1.51094800 | -1.06824900 |
| H | 6.57358400  | -2.46320600 | -1.48323600 |
| H | 8.01299400  | -1.50064900 | -1.13902200 |
| H | 6.53134500  | -0.71007300 | -1.70392800 |
| C | 7.07263000  | -2.44482900 | 1.28225900  |
| H | 6.70769400  | -3.43101400 | 0.97538300  |
| H | 6.79949000  | -2.30108000 | 2.33216000  |
| H | 8.16602100  | -2.45395500 | 1.21102700  |
| C | 2.45266500  | 0.87917600  | 2.49092500  |
| H | 1.39785500  | 1.01829800  | 2.23220000  |
| C | 3.16560100  | 2.23517300  | 2.34557500  |
| H | 4.18299700  | 2.19941900  | 2.74860000  |
| H | 2.63122600  | 3.00422400  | 2.91373200  |
| H | 3.22868400  | 2.55849200  | 1.30414600  |
| C | 2.52520100  | 0.43681200  | 3.96799700  |
| H | 1.93604200  | -0.46209100 | 4.15522000  |
| H | 2.14774500  | 1.22888400  | 4.62538100  |
| H | 3.56234300  | 0.22958600  | 4.25392700  |
| C | 0.96157800  | 1.81648000  | -0.77424000 |
| N | 2.08017900  | 2.16054100  | -1.45909200 |
| C | 2.41749400  | 3.48488100  | -1.19541900 |
| C | 1.50179200  | 3.95580300  | -0.29458200 |
| N | 0.60825200  | 2.91303900  | -0.04780200 |
| C | 2.72011200  | 1.27785100  | -2.48047700 |
| H | 2.38930200  | 0.27316600  | -2.21637600 |
| C | 4.24832900  | 1.27085600  | -2.42989100 |
| H | 4.71405600  | 2.14080000  | -2.89678300 |
| H | 4.58551800  | 0.38849100  | -2.98143200 |
| H | 4.60965000  | 1.17151300  | -1.40273200 |
| C | 2.12470200  | 1.60442900  | -3.85136500 |
| H | 1.03744400  | 1.50686200  | -3.80612800 |
| H | 2.49023300  | 0.88251500  | -4.58671300 |

|   |             |            |             |
|---|-------------|------------|-------------|
| H | 2.39266600  | 2.61084700 | -4.19296600 |
| C | 3.56852100  | 4.22170400 | -1.80373900 |
| H | 3.48103300  | 5.28603200 | -1.57959600 |
| H | 3.58694000  | 4.11899200 | -2.89123800 |
| H | 4.53342600  | 3.88102900 | -1.41743600 |
| C | 1.49960900  | 5.29278200 | 0.37806200  |
| H | 1.82698300  | 5.21978300 | 1.42030700  |
| H | 0.52276500  | 5.77732100 | 0.36567100  |
| H | 2.19733500  | 5.95821100 | -0.13291000 |
| C | -0.66628700 | 3.04480100 | 0.71847300  |
| H | -1.11687600 | 2.05293200 | 0.68125400  |
| C | -0.44181600 | 3.40009600 | 2.19147300  |
| H | 0.23095000  | 2.69169000 | 2.67731200  |
| H | -1.40439100 | 3.35598000 | 2.70525100  |
| H | -0.04703100 | 4.40861400 | 2.32749700  |
| C | -1.61300800 | 4.02075800 | 0.00533700  |
| H | -1.31601600 | 5.06323100 | 0.14237800  |
| H | -2.61816800 | 3.91289800 | 0.41733500  |
| H | -1.66724100 | 3.79259200 | -1.05873300 |

-----
